# Supplementary material for: High resolution GHz and THz (FTIR) spectroscopy and theory of parity violation and tunneling for 1,2-dithiine (C4H4S2) as a candidate for measuring the parity violating energy difference between enantiomers of chiral molecules
Source: Royal Society of Chemistry journal article supplement (doi:10.1039/c6cp01493c), 2016-01-01
Supplement: c6cp01493c1.pdf [file c6cp01493c1.pdf]

### Supporting information:

**High resolution GHz and THz (FTIR) spectroscopy and theory of parity violation and tunneling for 1,2-dithiine ( $C_4H_4S_2$ ) as a candidate for measuring the parity violating energy difference between enantiomers of chiral molecules**

S. Albert<sup>a,b</sup>, I. Bolotova<sup>a</sup>, Z. Chen<sup>a</sup>, C. Fábri<sup>a</sup>, L. Horný<sup>a</sup>, M. Quack<sup>\*a</sup>, G. Seyfang<sup>a</sup> and D. Zindel<sup>a</sup>

<sup>a</sup> Physical Chemistry, ETH Zurich, CH-8093 Zurich, Switzerland, <sup>b</sup> Swiss Light Source, PSI Villigen, CH-5232 Villigen Switzerland.

\* Author for correspondence email address:

[martin@quack.ch](mailto:martin@quack.ch)

Table 11 provide structural parameters along the IRC path. Table 12 gives rotational constants along the reaction path as a function of the  $\tau_{C_6S_1S_2C_3}$  coordinate (constrained geometry optimizations with different fixed  $\tau_{C_6S_1S_2C_3}$  values were carried out with the Gaussian 09 program package at the MP2/cc-pVTZ level of theory). Projected harmonic wavenumbers along the reaction path ( $3N - 7 = 23$  values excluding the ring puckering mode) are given by Tables 13 and 14. Table 15 gives harmonic wavenumbers, electric dipole transition moments and intensities calculated according to the double harmonic approximation (MP2/cc-pVTZ level of theory). The electric dipole transition moment components  $\mu_a$ ,  $\mu_b$  and  $\mu_c$  are given in the principal axis frame (see Table 16 for Cartesian coordinates of the equilibrium structure expressed in the principal axis frame). Tables 17, 18, 19, 20, 21, 22, 23, 24, 25 and 26 provide harmonic wavenumbers, intensities corresponding to the double harmonic approximation and equilibrium rotational constants (all of these quantities were calculated with the Gaussian 09 program package, MP2/cc-pVTZ level of theory) for all possible deuterated isotopomers of 1,2-dithiine. Table 27 provides a line list for the rotational transitions of the ground state of dithiine, Tables 28, 29 and 30 line lists for the fundamentals of the  $\nu_{22}$ ,  $\nu_{17}$  and  $\nu_3$  of dithiine.

Table 11: Molecular structural parameters ( $r$  in pm, bond ( $\alpha$ ) and torsional ( $\tau$ ) angles in degrees) along the IRC path for the stereomutation of 1,2-dithiine as calculated with MP2/cc-pVTZ level of theory obtained by the Gaussian 09 program package. The reaction coordinate  $q_i$  is given by discrete values numbered from  $i = 1$ . Internal coordinates are defined as follows:  $r_1 = r(\text{S}_1\text{C}_6)$ ,  $r_2 = r(\text{S}_1\text{S}_2)$ ,  $r_3 = r(\text{C}_5\text{C}_6)$ ,  $r_4 = r(\text{C}_4\text{C}_5)$ ,  $r_5 = r(\text{C}_6\text{H}_7)$ ,  $r_6 = r(\text{C}_5\text{H}_{10})$ ,  $\alpha_1 = \alpha(\text{C}_6\text{S}_1\text{S}_2)$ ,  $\alpha_2 = \alpha(\text{S}_1\text{C}_6\text{C}_5)$ ,  $\alpha_3 = \alpha(\text{C}_4\text{C}_5\text{C}_6)$ ,  $\alpha_4 = \alpha(\text{S}_1\text{C}_6\text{H}_7)$ ,  $\alpha_5 = \alpha(\text{C}_6\text{C}_5\text{H}_{10})$ ,  $\tau_1 = \tau(\text{C}_6\text{S}_1\text{S}_2\text{C}_3)$ ,  $\tau_2 = \tau(\text{S}_2\text{S}_1\text{C}_6\text{H}_7)$ ,  $\tau_3 = \tau(\text{S}_2\text{S}_1\text{C}_6\text{C}_5)$  and  $\tau_4 = \tau(\text{S}_1\text{C}_6\text{C}_5\text{H}_{10})$ . The second last column gives the energy with respect to the potential minimum.

| $r_1$ | $r_2$ | $r_3$ | $r_4$ | $r_5$ | $r_6$ | $\alpha_1$ | $\alpha_2$ | $\alpha_3$ | $\alpha_4$ | $\alpha_5$ | $\tau_1$ | $\tau_2$ | $\tau_3$ | $\tau_4$ | $E/(hc \text{ cm}^{-1})$ | $q_i$    |
|-------|-------|-------|-------|-------|-------|------------|------------|------------|------------|------------|----------|----------|----------|----------|--------------------------|----------|
| 175.4 | 212.8 | 134.2 | 145.4 | 108.3 | 108.1 | 104.7      | 129.6      | 125.7      | 109.9      | 116.7      | 0.0      | 180.0    | 0.0      | 180.0    | 2899                     | $q_1$    |
| 175.4 | 212.8 | 134.2 | 145.4 | 108.3 | 108.1 | 104.7      | 129.6      | 125.7      | 109.9      | 116.7      | -1.8     | -178.7   | 1.6      | 179.7    | 2892                     | $q_2$    |
| 175.4 | 212.7 | 134.2 | 145.4 | 108.3 | 108.1 | 104.7      | 129.5      | 125.7      | 109.9      | 116.7      | -3.7     | -177.4   | 3.1      | 179.5    | 2875                     | $q_3$    |
| 175.4 | 212.7 | 134.2 | 145.4 | 108.3 | 108.1 | 104.7      | 129.5      | 125.7      | 110.0      | 116.7      | -5.5     | -176.2   | 4.7      | 179.2    | 2846                     | $q_4$    |
| 175.4 | 212.6 | 134.2 | 145.3 | 108.3 | 108.1 | 104.6      | 129.4      | 125.7      | 110.0      | 116.7      | -7.4     | -174.9   | 6.2      | 179.0    | 2804                     | $q_5$    |
| 175.4 | 212.5 | 134.2 | 145.3 | 108.3 | 108.1 | 104.6      | 129.3      | 125.7      | 110.1      | 116.7      | -9.2     | -173.6   | 7.8      | 178.7    | 2754                     | $q_6$    |
| 175.4 | 212.4 | 134.2 | 145.3 | 108.3 | 108.1 | 104.5      | 129.2      | 125.7      | 110.2      | 116.7      | -11.0    | -172.4   | 9.3      | 178.5    | 2690                     | $q_7$    |
| 175.4 | 212.3 | 134.3 | 145.3 | 108.3 | 108.1 | 104.4      | 129.0      | 125.7      | 110.4      | 116.7      | -12.9    | -171.1   | 10.8     | 178.3    | 2618                     | $q_8$    |
| 175.4 | 212.2 | 134.3 | 145.3 | 108.3 | 108.1 | 104.3      | 128.9      | 125.7      | 110.5      | 116.7      | -14.7    | -169.8   | 12.3     | 178.1    | 2534                     | $q_9$    |
| 175.5 | 212.0 | 134.3 | 145.3 | 108.3 | 108.1 | 104.2      | 128.7      | 125.7      | 110.7      | 116.7      | -16.5    | -168.6   | 13.8     | 177.9    | 2444                     | $q_{10}$ |
| 175.5 | 211.9 | 134.3 | 145.2 | 108.3 | 108.1 | 104.1      | 128.5      | 125.7      | 110.8      | 116.7      | -18.3    | -167.3   | 15.3     | 177.7    | 2343                     | $q_{11}$ |
| 175.5 | 211.7 | 134.4 | 145.2 | 108.3 | 108.1 | 104.0      | 128.3      | 125.7      | 111.0      | 116.7      | -20.1    | -166.1   | 16.7     | 177.5    | 2236                     | $q_{12}$ |
| 175.5 | 211.5 | 134.4 | 145.2 | 108.3 | 108.1 | 103.8      | 128.0      | 125.7      | 111.2      | 116.8      | -21.9    | -164.8   | 18.2     | 177.3    | 2120                     | $q_{13}$ |
| 175.6 | 211.3 | 134.4 | 145.1 | 108.3 | 108.1 | 103.7      | 127.8      | 125.6      | 111.5      | 116.8      | -23.6    | -163.6   | 19.6     | 177.2    | 1999                     | $q_{14}$ |
| 175.6 | 211.1 | 134.5 | 145.1 | 108.3 | 108.2 | 103.5      | 127.5      | 125.6      | 111.7      | 116.8      | -25.4    | -162.3   | 21.0     | 177.1    | 1872                     | $q_{15}$ |
| 175.6 | 210.8 | 134.5 | 145.1 | 108.3 | 108.2 | 103.3      | 127.3      | 125.6      | 111.9      | 116.8      | -27.1    | -161.1   | 22.3     | 177.0    | 1742                     | $q_{16}$ |
| 175.6 | 210.6 | 134.5 | 145.1 | 108.3 | 108.2 | 103.1      | 127.0      | 125.6      | 112.2      | 116.9      | -28.8    | -159.9   | 23.6     | 176.9    | 1608                     | $q_{17}$ |
| 175.7 | 210.3 | 134.6 | 145.0 | 108.3 | 108.2 | 102.9      | 126.7      | 125.6      | 112.4      | 116.9      | -30.5    | -158.7   | 24.9     | 176.8    | 1472                     | $q_{18}$ |
| 175.7 | 210.1 | 134.6 | 145.0 | 108.3 | 108.2 | 102.7      | 126.4      | 125.5      | 112.7      | 116.9      | -32.2    | -157.5   | 26.2     | 176.7    | 1334                     | $q_{19}$ |
| 175.7 | 209.8 | 134.7 | 145.0 | 108.3 | 108.2 | 102.5      | 126.1      | 125.5      | 113.0      | 117.0      | -33.9    | -156.3   | 27.5     | 176.7    | 1198                     | $q_{20}$ |
| 175.8 | 209.5 | 134.7 | 144.9 | 108.3 | 108.2 | 102.2      | 125.7      | 125.4      | 113.2      | 117.0      | -35.6    | -155.1   | 28.7     | 176.6    | 1062                     | $q_{21}$ |
| 175.8 | 209.3 | 134.7 | 144.9 | 108.3 | 108.2 | 102.0      | 125.4      | 125.4      | 113.5      | 117.0      | -37.2    | -153.9   | 29.9     | 176.6    | 930                      | $q_{22}$ |
| 175.8 | 209.0 | 134.8 | 144.9 | 108.3 | 108.2 | 101.7      | 125.1      | 125.3      | 113.8      | 117.1      | -38.8    | -152.8   | 31.1     | 176.6    | 801                      | $q_{23}$ |
| 175.9 | 208.7 | 134.8 | 144.9 | 108.2 | 108.2 | 101.4      | 124.7      | 125.2      | 114.1      | 117.1      | -40.5    | -151.6   | 32.3     | 176.6    | 678                      | $q_{24}$ |
| 175.9 | 208.4 | 134.8 | 144.8 | 108.2 | 108.2 | 101.1      | 124.4      | 125.2      | 114.4      | 117.2      | -42.1    | -150.5   | 33.4     | 176.6    | 559                      | $q_{25}$ |
| 175.9 | 208.1 | 134.9 | 144.8 | 108.2 | 108.2 | 100.8      | 124.0      | 125.1      | 114.6      | 117.3      | -43.6    | -149.4   | 34.5     | 176.6    | 449                      | $q_{26}$ |
| 176.0 | 207.9 | 134.9 | 144.8 | 108.2 | 108.2 | 100.5      | 123.7      | 125.0      | 114.9      | 117.3      | -45.2    | -148.3   | 35.6     | 176.7    | 348                      | $q_{27}$ |
| 176.0 | 207.6 | 134.9 | 144.8 | 108.2 | 108.2 | 100.2      | 123.3      | 124.9      | 115.2      | 117.4      | -46.7    | -147.1   | 36.7     | 176.7    | 258                      | $q_{28}$ |
| 176.0 | 207.3 | 135.0 | 144.8 | 108.2 | 108.2 | 99.8       | 123.0      | 124.8      | 115.5      | 117.5      | -48.2    | -146.1   | 37.7     | 176.8    | 179                      | $q_{29}$ |
| 176.1 | 207.1 | 135.0 | 144.7 | 108.2 | 108.2 | 99.4       | 122.6      | 124.7      | 115.7      | 117.5      | -49.7    | -145.0   | 38.7     | 176.9    | 114                      | $q_{30}$ |
| 176.2 | 206.2 | 135.1 | 144.7 | 108.2 | 108.2 | 98.0       | 121.4      | 124.2      | 116.6      | 117.9      | -55.0    | -141.1   | 42.3     | 177.2    | 0                        | $q_{31}$ |

Table 12: Rotational constants ( $A$ ,  $B$  and  $C$ , in  $\text{cm}^{-1}$ ) along the reaction path (the reaction coordinate is defined as  $\tau_{\text{C}_6\text{S}_1\text{S}_2\text{C}_3}$  and given in degrees). Rotational constants were calculated from MP2/cc-pVTZ geometries obtained by setting  $\tau_{\text{C}_6\text{S}_1\text{S}_2\text{C}_3}$  to a fixed value and optimizing the remaining coordinates. Constrained optimizations were carried out by the Gaussian 09 program package. The values  $\tau_{\text{C}_6\text{S}_1\text{S}_2\text{C}_3} = 0.0000^\circ$  and  $\tau_{\text{C}_6\text{S}_1\text{S}_2\text{C}_3} = 54.9891^\circ$  correspond to transition state and equilibrium structures. Symmetrically equivalent rotational constant values with  $\tau_{\text{C}_6\text{S}_1\text{S}_2\text{C}_3} < 0.0000^\circ$  can be readily obtained by reflection to  $\tau_{\text{C}_6\text{S}_1\text{S}_2\text{C}_3} = 0.0000^\circ$ .

| $\tau_{\text{C}_6\text{S}_1\text{S}_2\text{C}_3}$ | $A$      | $B$      | $C$      | $\tau_{\text{C}_6\text{S}_1\text{S}_2\text{C}_3}$ | $A$      | $B$      | $C$      |
|---------------------------------------------------|----------|----------|----------|---------------------------------------------------|----------|----------|----------|
| 0.0000                                            | 0.107846 | 0.100062 | 0.051904 | 50.1371                                           | 0.110749 | 0.102956 | 0.057704 |
| 1.6173                                            | 0.107851 | 0.100065 | 0.051910 | 51.7545                                           | 0.110861 | 0.103137 | 0.058096 |
| 3.2347                                            | 0.107863 | 0.100076 | 0.051928 | 53.3718                                           | 0.110965 | 0.103326 | 0.058503 |
| 4.8520                                            | 0.107883 | 0.100093 | 0.051958 | 54.9891                                           | 0.111061 | 0.103524 | 0.058925 |
| 6.4693                                            | 0.107912 | 0.100117 | 0.052000 | 56.6064                                           | 0.111148 | 0.103730 | 0.059362 |
| 8.0866                                            | 0.107948 | 0.100148 | 0.052054 | 58.2238                                           | 0.111224 | 0.103946 | 0.059814 |
| 9.7040                                            | 0.107993 | 0.100185 | 0.052119 | 59.8411                                           | 0.111287 | 0.104174 | 0.060282 |
| 11.3213                                           | 0.108045 | 0.100230 | 0.052197 | 61.4584                                           | 0.111338 | 0.104413 | 0.060766 |
| 12.9386                                           | 0.108105 | 0.100280 | 0.052287 | 63.0757                                           | 0.111374 | 0.104665 | 0.061265 |
| 14.5559                                           | 0.108173 | 0.100337 | 0.052388 | 64.6931                                           | 0.111393 | 0.104932 | 0.061780 |
| 16.1733                                           | 0.108247 | 0.100400 | 0.052501 | 66.3104                                           | 0.111395 | 0.105214 | 0.062310 |
| 17.7906                                           | 0.108329 | 0.100470 | 0.052627 | 67.9277                                           | 0.111379 | 0.105512 | 0.062855 |
| 19.4079                                           | 0.108417 | 0.100545 | 0.052764 | 69.5451                                           | 0.111342 | 0.105829 | 0.063415 |
| 21.0252                                           | 0.108512 | 0.100626 | 0.052913 | 71.1624                                           | 0.111283 | 0.106166 | 0.063989 |
| 22.6426                                           | 0.108612 | 0.100712 | 0.053074 | 72.7797                                           | 0.111202 | 0.106523 | 0.064576 |
| 24.2599                                           | 0.108719 | 0.100804 | 0.053247 | 74.3970                                           | 0.111098 | 0.106901 | 0.065176 |
| 25.8772                                           | 0.108830 | 0.100902 | 0.053433 | 76.0144                                           | 0.110970 | 0.107303 | 0.065787 |
| 27.4946                                           | 0.108946 | 0.101004 | 0.053630 | 77.6317                                           | 0.110817 | 0.107727 | 0.066408 |
| 29.1119                                           | 0.109067 | 0.101112 | 0.053839 | 79.2490                                           | 0.110639 | 0.108176 | 0.067037 |
| 30.7292                                           | 0.109192 | 0.101224 | 0.054060 | 80.8663                                           | 0.110437 | 0.108649 | 0.067673 |
| 32.3465                                           | 0.109319 | 0.101341 | 0.054293 | 82.4837                                           | 0.110212 | 0.109145 | 0.068314 |
| 33.9639                                           | 0.109450 | 0.101463 | 0.054539 | 84.1010                                           | 0.109964 | 0.109666 | 0.068959 |
| 35.5812                                           | 0.109582 | 0.101590 | 0.054797 | 85.7183                                           | 0.110209 | 0.109695 | 0.069606 |
| 37.1985                                           | 0.109716 | 0.101721 | 0.055068 | 87.3356                                           | 0.110773 | 0.109407 | 0.070252 |
| 38.8158                                           | 0.109851 | 0.101857 | 0.055351 | 88.9530                                           | 0.111356 | 0.109103 | 0.070897 |
| 40.4332                                           | 0.109985 | 0.101998 | 0.055647 | 90.5703                                           | 0.111957 | 0.108786 | 0.071539 |
| 42.0505                                           | 0.110119 | 0.102144 | 0.055956 | 92.1876                                           | 0.112572 | 0.108460 | 0.072176 |
| 43.6678                                           | 0.110252 | 0.102295 | 0.056278 | 93.8050                                           | 0.113198 | 0.108129 | 0.072808 |
| 45.2851                                           | 0.110382 | 0.102451 | 0.056614 | 95.4223                                           | 0.113832 | 0.107800 | 0.073434 |
| 46.9025                                           | 0.110509 | 0.102613 | 0.056964 | 97.0396                                           | 0.114468 | 0.107480 | 0.074052 |
| 48.5198                                           | 0.110631 | 0.102781 | 0.057327 | 98.6569                                           | 0.115101 | 0.107178 | 0.074664 |



|         |       |       |       |       |       |       |       |       |       |       |       |       |       |        |        |        |        |        |        |        |        |        |        |
|---------|-------|-------|-------|-------|-------|-------|-------|-------|-------|-------|-------|-------|-------|--------|--------|--------|--------|--------|--------|--------|--------|--------|--------|
| 51.7545 | 212.8 | 313.2 | 448.8 | 520.4 | 569.6 | 629.5 | 701.1 | 738.7 | 779.7 | 857.9 | 929.8 | 938.3 | 998.1 | 1185.4 | 1188.6 | 1331.5 | 1392.6 | 1575.4 | 1615.1 | 3196.3 | 3203.5 | 3219.7 | 3225.3 |
| 53.3718 | 213.5 | 314.0 | 448.3 | 521.3 | 570.5 | 630.8 | 701.4 | 739.4 | 780.0 | 858.2 | 929.2 | 938.3 | 997.8 | 1183.4 | 1186.6 | 1330.5 | 1391.4 | 1571.7 | 1612.6 | 3196.5 | 3204.0 | 3220.3 | 3225.4 |
| 54.9891 | 214.4 | 315.0 | 447.8 | 522.1 | 571.2 | 632.0 | 701.7 | 740.1 | 780.2 | 858.5 | 928.6 | 938.2 | 997.3 | 1181.3 | 1184.4 | 1329.3 | 1390.0 | 1567.7 | 1609.8 | 3196.6 | 3204.4 | 3220.9 | 3225.6 |
| 56.6064 | 215.5 | 316.1 | 447.2 | 522.9 | 571.8 | 633.3 | 702.1 | 740.7 | 780.2 | 858.6 | 927.9 | 938.1 | 996.7 | 1179.1 | 1182.2 | 1328.1 | 1388.5 | 1563.5 | 1606.8 | 3196.7 | 3204.9 | 3221.6 | 3225.9 |
| 58.2238 | 216.8 | 317.4 | 446.7 | 523.6 | 572.1 | 634.6 | 702.4 | 741.3 | 780.1 | 858.8 | 927.1 | 937.8 | 995.9 | 1176.8 | 1179.8 | 1326.7 | 1386.9 | 1558.9 | 1603.6 | 3196.7 | 3205.3 | 3222.4 | 3226.3 |
| 59.8411 | 218.3 | 318.8 | 446.1 | 524.1 | 572.3 | 635.9 | 702.8 | 741.7 | 779.9 | 858.8 | 926.2 | 937.5 | 995.0 | 1174.4 | 1177.3 | 1325.3 | 1385.1 | 1554.0 | 1600.2 | 3196.8 | 3205.7 | 3223.4 | 3226.9 |
| 61.4584 | 219.9 | 320.3 | 445.5 | 524.6 | 572.2 | 637.1 | 703.3 | 742.1 | 779.6 | 858.8 | 925.2 | 937.0 | 993.9 | 1171.9 | 1174.7 | 1323.8 | 1382.2 | 1548.8 | 1596.4 | 3196.8 | 3206.1 | 3224.4 | 3227.5 |
| 63.0757 | 221.7 | 321.9 | 445.0 | 524.9 | 572.0 | 638.3 | 703.8 | 742.3 | 779.3 | 858.6 | 924.1 | 936.3 | 992.7 | 1169.3 | 1171.9 | 1322.2 | 1381.2 | 1543.2 | 1592.4 | 3196.8 | 3206.4 | 3225.6 | 3228.3 |
| 64.6931 | 223.5 | 323.8 | 444.3 | 525.1 | 571.6 | 639.4 | 704.3 | 742.3 | 778.9 | 858.4 | 922.9 | 935.6 | 991.2 | 1166.5 | 1169.0 | 1320.4 | 1378.9 | 1537.1 | 1588.1 | 3196.7 | 3206.6 | 3226.8 | 3229.3 |
| 66.3104 | 225.5 | 325.7 | 443.7 | 525.0 | 571.0 | 640.4 | 705.0 | 742.1 | 778.6 | 858.0 | 921.6 | 934.7 | 989.6 | 1163.7 | 1166.0 | 1318.6 | 1376.6 | 1530.6 | 1583.4 | 3196.6 | 3206.7 | 3228.2 | 3230.3 |
| 67.9277 | 227.5 | 327.8 | 443.0 | 524.6 | 570.2 | 641.3 | 705.8 | 741.6 | 778.3 | 857.6 | 920.2 | 933.7 | 987.7 | 1160.8 | 1162.8 | 1316.7 | 1374.0 | 1523.6 | 1578.4 | 3196.5 | 3206.7 | 3229.6 | 3231.5 |
| 69.5451 | 229.6 | 330.1 | 442.3 | 524.0 | 569.4 | 642.1 | 706.6 | 740.8 | 778.2 | 857.0 | 918.7 | 932.5 | 985.7 | 1157.8 | 1159.4 | 1314.6 | 1371.3 | 1516.1 | 1573.0 | 3196.2 | 3206.7 | 3231.1 | 3232.8 |
| 71.1624 | 231.6 | 332.5 | 441.5 | 523.1 | 568.3 | 642.6 | 707.6 | 739.5 | 778.2 | 856.2 | 917.1 | 931.2 | 983.4 | 1154.6 | 1155.9 | 1312.5 | 1368.4 | 1508.0 | 1567.1 | 3196.0 | 3206.5 | 3232.7 | 3234.2 |
| 72.7797 | 233.7 | 335.1 | 440.6 | 521.8 | 567.2 | 643.0 | 708.7 | 737.9 | 778.4 | 855.3 | 915.4 | 929.7 | 980.9 | 1151.4 | 1152.2 | 1310.2 | 1365.2 | 1499.3 | 1560.9 | 3195.6 | 3206.3 | 3234.3 | 3235.7 |
| 74.3970 | 235.7 | 337.8 | 439.7 | 520.1 | 566.0 | 643.2 | 710.0 | 735.9 | 778.8 | 854.3 | 913.6 | 928.1 | 978.2 | 1148.1 | 1148.4 | 1307.8 | 1361.9 | 1490.1 | 1554.2 | 3195.2 | 3205.9 | 3236.0 | 3237.2 |
| 76.0144 | 237.6 | 340.6 | 438.7 | 518.0 | 564.7 | 643.2 | 711.4 | 733.4 | 779.4 | 853.1 | 911.8 | 926.2 | 975.3 | 1144.4 | 1144.7 | 1305.3 | 1358.4 | 1480.1 | 1547.1 | 3194.8 | 3205.5 | 3237.6 | 3238.8 |
| 77.6317 | 239.4 | 343.6 | 437.6 | 515.5 | 563.3 | 642.9 | 712.9 | 730.5 | 780.2 | 851.8 | 909.9 | 924.2 | 972.2 | 1140.2 | 1141.2 | 1302.7 | 1354.7 | 1469.5 | 1539.5 | 3194.2 | 3205.0 | 3239.2 | 3240.3 |
| 79.2490 | 241.0 | 346.7 | 436.4 | 512.5 | 561.9 | 642.4 | 714.6 | 727.1 | 781.3 | 850.2 | 908.0 | 922.1 | 968.9 | 1135.9 | 1137.5 | 1300.0 | 1350.7 | 1458.2 | 1531.5 | 3193.6 | 3204.4 | 3240.8 | 3241.9 |
| 80.8663 | 242.5 | 349.9 | 435.2 | 509.1 | 560.4 | 641.7 | 716.4 | 723.4 | 782.5 | 848.5 | 906.1 | 919.7 | 965.5 | 1131.4 | 1133.8 | 1297.1 | 1346.4 | 1446.3 | 1522.9 | 3192.9 | 3203.7 | 3242.3 | 3243.3 |
| 82.4837 | 243.7 | 353.2 | 433.9 | 505.1 | 559.0 | 640.7 | 718.4 | 719.4 | 783.9 | 846.6 | 904.1 | 917.2 | 961.9 | 1126.7 | 1129.9 | 1294.1 | 1341.7 | 1433.8 | 1513.8 | 3192.1 | 3202.9 | 3243.7 | 3244.7 |
| 84.1010 | 244.7 | 356.5 | 432.7 | 500.7 | 557.5 | 639.5 | 715.0 | 720.5 | 785.5 | 844.4 | 902.1 | 914.4 | 958.3 | 1121.8 | 1126.0 | 1290.9 | 1336.6 | 1420.7 | 1504.3 | 3191.3 | 3202.1 | 3245.0 | 3246.0 |
| 85.7183 | 245.3 | 359.9 | 431.5 | 495.8 | 556.0 | 638.1 | 710.4 | 722.6 | 787.1 | 842.1 | 900.1 | 911.5 | 954.5 | 1116.7 | 1121.9 | 1287.5 | 1330.8 | 1407.3 | 1494.3 | 3190.4 | 3201.1 | 3246.1 | 3247.1 |
| 87.3356 | 245.6 | 363.4 | 430.4 | 490.3 | 554.6 | 636.4 | 705.4 | 724.9 | 788.9 | 839.5 | 898.2 | 908.4 | 950.8 | 1111.4 | 1117.6 | 1284.0 | 1324.2 | 1393.7 | 1483.8 | 3189.4 | 3200.1 | 3247.0 | 3248.0 |
| 88.9530 | 245.4 | 366.8 | 429.5 | 484.1 | 553.1 | 634.6 | 700.3 | 727.2 | 790.8 | 836.6 | 896.3 | 905.0 | 947.0 | 1105.9 | 1113.1 | 1280.2 | 1316.2 | 1380.5 | 1473.0 | 3188.3 | 3199.0 | 3247.7 | 3248.7 |
| 90.5703 | 244.8 | 370.1 | 428.9 | 477.3 | 551.7 | 632.5 | 695.0 | 729.6 | 792.7 | 833.5 | 894.4 | 901.5 | 943.3 | 1100.1 | 1108.5 | 1276.1 | 1306.3 | 1368.1 | 1461.7 | 3187.1 | 3197.9 | 3248.1 | 3249.1 |
| 92.1876 | 243.5 | 373.5 | 428.5 | 469.7 | 550.4 | 630.3 | 689.5 | 731.9 | 794.6 | 830.1 | 892.6 | 897.8 | 939.7 | 1093.9 | 1103.5 | 1271.8 | 1294.1 | 1357.2 | 1450.1 | 3185.9 | 3196.7 | 3248.1 | 3249.2 |
| 93.8050 | 241.5 | 376.7 | 428.4 | 461.4 | 549.2 | 628.0 | 684.1 | 734.2 | 796.6 | 826.4 | 890.8 | 894.0 | 936.0 | 1087.3 | 1098.3 | 1267.0 | 1279.3 | 1347.9 | 1438.2 | 3184.6 | 3195.5 | 3247.8 | 3248.9 |
| 95.4223 | 238.6 | 379.8 | 428.2 | 452.4 | 548.1 | 625.6 | 678.6 | 736.3 | 798.6 | 822.5 | 889.1 | 890.1 | 932.5 | 1080.3 | 1092.5 | 1261.9 | 1262.2 | 1340.1 | 1426.2 | 3183.3 | 3194.2 | 3247.1 | 3248.2 |
| 97.0396 | 234.6 | 382.7 | 426.4 | 444.1 | 547.2 | 623.2 | 673.3 | 738.3 | 800.5 | 818.2 | 886.1 | 887.4 | 929.0 | 1072.6 | 1086.1 | 1243.3 | 1256.3 | 1333.6 | 1414.0 | 3182.0 | 3192.9 | 3245.8 | 3246.9 |
| 98.6569 | 229.1 | 385.5 | 418.7 | 442.3 | 546.5 | 621.0 | 668.1 | 740.0 | 802.7 | 813.7 | 882.2 | 885.8 | 925.7 | 1064.1 | 1078.7 | 1223.7 | 1250.1 | 1328.1 | 1401.8 | 3180.6 | 3191.7 | 3244.0 | 3245.1 |



|         |       |       |       |       |       |       |       |       |       |       |       |       |        |        |        |        |        |        |        |        |        |        |
|---------|-------|-------|-------|-------|-------|-------|-------|-------|-------|-------|-------|-------|--------|--------|--------|--------|--------|--------|--------|--------|--------|--------|
| 48.5198 | 212.2 | 311.8 | 449.8 | 567.1 | 518.7 | 627.3 | 700.6 | 737.3 | 778.8 | 857.1 | 938.0 | 998.4 | 1189.2 | 1192.3 | 1333.4 | 1394.8 | 1582.1 | 1619.7 | 3196.1 | 3202.6 | 3219.0 | 3225.4 |
| 50.1371 | 212.4 | 312.4 | 449.3 | 568.4 | 519.6 | 628.4 | 700.9 | 738.0 | 779.3 | 857.5 | 938.2 | 998.3 | 1187.3 | 1190.5 | 1332.5 | 1393.7 | 1578.9 | 1617.5 | 3196.2 | 3203.0 | 3219.3 | 3225.3 |
| 51.7545 | 212.8 | 313.2 | 448.8 | 569.6 | 520.4 | 629.5 | 701.1 | 738.7 | 779.7 | 857.9 | 938.3 | 998.1 | 1185.4 | 1188.6 | 1331.5 | 1392.6 | 1575.4 | 1615.1 | 3196.3 | 3203.5 | 3219.7 | 3225.3 |
| 53.3718 | 213.5 | 314.0 | 448.3 | 570.5 | 521.3 | 630.8 | 701.4 | 739.4 | 780.0 | 858.2 | 938.3 | 997.8 | 1183.4 | 1186.6 | 1330.5 | 1391.4 | 1571.7 | 1612.6 | 3196.5 | 3204.0 | 3220.3 | 3225.4 |
| 54.9891 | 214.4 | 315.0 | 447.8 | 571.2 | 522.1 | 632.0 | 701.7 | 740.1 | 780.2 | 858.5 | 938.2 | 997.3 | 1181.3 | 1184.4 | 1329.3 | 1390.0 | 1567.7 | 1609.8 | 3196.6 | 3204.4 | 3220.9 | 3225.6 |
| 56.6064 | 215.5 | 316.1 | 447.2 | 571.8 | 522.9 | 633.3 | 702.1 | 740.7 | 780.2 | 858.6 | 938.1 | 996.7 | 1179.1 | 1182.2 | 1328.1 | 1388.5 | 1563.5 | 1606.8 | 3196.7 | 3204.9 | 3221.6 | 3225.9 |
| 58.2238 | 216.8 | 317.4 | 446.7 | 572.1 | 523.6 | 634.6 | 702.4 | 741.3 | 780.1 | 858.8 | 937.8 | 995.9 | 1176.8 | 1179.8 | 1326.7 | 1386.9 | 1558.9 | 1603.6 | 3196.7 | 3205.3 | 3222.4 | 3226.3 |
| 59.8411 | 218.3 | 318.8 | 446.1 | 572.3 | 524.1 | 635.9 | 702.8 | 741.7 | 779.9 | 858.8 | 937.5 | 995.0 | 1174.4 | 1177.3 | 1325.3 | 1385.1 | 1554.0 | 1600.2 | 3196.8 | 3205.7 | 3223.4 | 3226.9 |
| 61.4584 | 219.9 | 320.3 | 445.5 | 572.2 | 524.6 | 637.1 | 703.3 | 742.1 | 779.6 | 858.8 | 937.0 | 993.9 | 1171.9 | 1174.7 | 1323.8 | 1383.2 | 1548.8 | 1596.4 | 3196.8 | 3206.1 | 3224.4 | 3227.5 |
| 63.0757 | 221.7 | 321.9 | 445.0 | 572.0 | 524.9 | 638.3 | 703.8 | 742.3 | 779.3 | 858.6 | 936.3 | 992.7 | 1169.3 | 1171.9 | 1322.2 | 1381.2 | 1543.2 | 1592.4 | 3196.8 | 3206.4 | 3225.6 | 3228.3 |
| 64.6931 | 223.5 | 323.8 | 444.3 | 571.6 | 525.1 | 639.4 | 704.3 | 742.3 | 778.9 | 858.4 | 935.6 | 991.2 | 1166.5 | 1169.0 | 1320.4 | 1378.9 | 1537.1 | 1588.1 | 3196.7 | 3206.6 | 3226.8 | 3229.3 |
| 66.3104 | 225.5 | 325.7 | 443.7 | 571.0 | 525.0 | 640.4 | 705.0 | 742.1 | 778.6 | 858.0 | 934.7 | 989.6 | 1163.7 | 1166.0 | 1318.6 | 1376.6 | 1530.6 | 1583.4 | 3196.6 | 3206.7 | 3228.2 | 3230.3 |
| 67.9277 | 227.5 | 327.8 | 443.0 | 570.2 | 524.6 | 641.3 | 705.8 | 741.6 | 778.3 | 857.6 | 933.7 | 987.7 | 1160.8 | 1162.8 | 1316.7 | 1374.0 | 1523.6 | 1578.4 | 3196.5 | 3206.7 | 3229.6 | 3231.5 |
| 69.5451 | 229.6 | 330.1 | 442.3 | 569.4 | 524.0 | 642.1 | 706.6 | 740.8 | 778.2 | 857.0 | 932.5 | 985.7 | 1157.8 | 1159.4 | 1314.6 | 1371.3 | 1516.1 | 1573.0 | 3196.2 | 3206.7 | 3231.1 | 3232.8 |
| 71.1624 | 231.6 | 332.5 | 441.5 | 568.3 | 523.1 | 642.6 | 707.6 | 739.5 | 778.2 | 856.2 | 931.2 | 983.4 | 1154.6 | 1155.9 | 1312.5 | 1368.4 | 1508.0 | 1567.1 | 3196.0 | 3206.5 | 3232.7 | 3234.2 |
| 72.7797 | 233.7 | 335.1 | 440.6 | 567.2 | 521.8 | 643.0 | 708.7 | 737.9 | 778.4 | 855.3 | 929.7 | 980.9 | 1151.4 | 1152.2 | 1310.2 | 1365.2 | 1499.3 | 1560.9 | 3195.6 | 3206.3 | 3234.3 | 3235.7 |
| 74.3970 | 235.7 | 337.8 | 439.7 | 566.0 | 520.1 | 643.2 | 710.0 | 735.9 | 778.8 | 854.3 | 928.1 | 978.2 | 1148.1 | 1148.4 | 1307.8 | 1361.9 | 1490.1 | 1554.2 | 3195.2 | 3205.9 | 3236.0 | 3237.2 |
| 76.0144 | 237.6 | 340.6 | 438.7 | 564.7 | 518.0 | 643.2 | 711.4 | 733.4 | 779.4 | 853.1 | 926.2 | 975.3 | 1144.7 | 1144.4 | 1305.3 | 1358.4 | 1480.1 | 1547.1 | 3194.8 | 3205.5 | 3237.6 | 3238.8 |
| 77.6317 | 239.4 | 343.6 | 437.6 | 563.3 | 515.5 | 642.9 | 712.9 | 730.5 | 780.2 | 851.8 | 924.2 | 972.2 | 1141.2 | 1140.2 | 1302.7 | 1354.7 | 1469.5 | 1539.5 | 3194.2 | 3205.0 | 3239.2 | 3240.3 |
| 79.2490 | 241.0 | 346.7 | 436.4 | 561.9 | 512.5 | 642.4 | 714.6 | 727.1 | 781.3 | 850.2 | 922.1 | 968.9 | 1137.5 | 1135.9 | 1300.0 | 1350.7 | 1458.2 | 1531.5 | 3193.6 | 3204.4 | 3240.8 | 3241.9 |
| 80.8663 | 242.5 | 349.9 | 435.2 | 560.4 | 509.1 | 641.7 | 716.4 | 723.4 | 782.5 | 848.5 | 919.7 | 965.5 | 1133.8 | 1131.4 | 1297.1 | 1346.4 | 1446.3 | 1522.9 | 3192.9 | 3203.7 | 3242.3 | 3243.3 |
| 82.4837 | 243.7 | 353.2 | 433.9 | 559.0 | 505.1 | 640.7 | 718.4 | 719.4 | 783.9 | 846.6 | 917.2 | 961.9 | 1129.9 | 1126.7 | 1294.1 | 1341.7 | 1433.8 | 1513.8 | 3192.1 | 3202.9 | 3243.7 | 3244.7 |
| 84.1010 | 244.7 | 356.5 | 432.7 | 557.5 | 500.7 | 639.5 | 720.5 | 715.0 | 785.5 | 844.4 | 914.4 | 958.3 | 1126.0 | 1121.8 | 1290.9 | 1336.6 | 1420.7 | 1504.3 | 3191.3 | 3202.1 | 3245.0 | 3246.0 |
| 85.7183 | 245.3 | 359.9 | 431.5 | 556.0 | 495.8 | 638.1 | 722.6 | 710.4 | 787.1 | 842.1 | 911.5 | 954.5 | 1121.9 | 1116.7 | 1287.5 | 1330.8 | 1407.3 | 1494.3 | 3190.4 | 3201.1 | 3246.1 | 3247.1 |
| 87.3356 | 245.6 | 363.4 | 430.4 | 554.6 | 490.3 | 636.4 | 724.9 | 705.4 | 788.9 | 839.5 | 908.4 | 950.8 | 1117.6 | 1111.4 | 1284.0 | 1324.2 | 1393.7 | 1483.8 | 3189.4 | 3200.1 | 3247.0 | 3248.0 |
| 88.9530 | 245.4 | 366.8 | 429.5 | 553.1 | 484.1 | 634.6 | 727.2 | 700.3 | 790.8 | 836.6 | 905.0 | 947.0 | 1113.1 | 1105.9 | 1280.2 | 1316.2 | 1380.5 | 1473.0 | 3188.3 | 3199.0 | 3247.7 | 3248.7 |
| 90.5703 | 244.8 | 370.1 | 428.9 | 551.7 | 477.3 | 632.5 | 729.6 | 695.0 | 792.7 | 833.5 | 901.5 | 943.3 | 1108.5 | 1100.1 | 1276.1 | 1306.3 | 1368.1 | 1461.7 | 3187.1 | 3197.9 | 3248.1 | 3249.1 |
| 92.1876 | 243.5 | 373.5 | 428.5 | 550.4 | 469.7 | 630.3 | 731.9 | 689.5 | 794.6 | 830.1 | 892.6 | 939.7 | 1103.5 | 1093.9 | 1271.8 | 1294.1 | 1357.2 | 1450.1 | 3185.9 | 3196.7 | 3248.1 | 3249.2 |
| 93.8050 | 241.5 | 376.7 | 428.4 | 549.2 | 461.4 | 628.0 | 734.2 | 684.1 | 796.6 | 826.4 | 890.8 | 936.0 | 1098.3 | 1087.3 | 1267.0 | 1279.3 | 1347.9 | 1438.2 | 3184.6 | 3195.5 | 3247.8 | 3248.9 |
| 95.4223 | 238.6 | 379.8 | 428.2 | 548.1 | 452.4 | 625.6 | 736.3 | 678.6 | 798.6 | 822.5 | 889.1 | 932.5 | 1092.5 | 1080.3 | 1261.9 | 1262.2 | 1340.1 | 1426.2 | 3183.3 | 3194.2 | 3247.1 | 3248.2 |
| 97.0396 | 234.6 | 382.7 | 426.4 | 547.2 | 444.1 | 623.2 | 738.3 | 673.3 | 800.5 | 818.2 | 887.4 | 929.0 | 1086.1 | 1072.6 | 1256.3 | 1243.3 | 1333.6 | 1414.0 | 3182.0 | 3192.9 | 3245.8 | 3246.9 |
| 98.6569 | 229.1 | 385.5 | 418.7 | 546.5 | 442.3 | 621.0 | 740.0 | 668.1 | 802.7 | 813.7 | 885.8 | 925.7 | 1078.7 | 1064.1 | 1250.1 | 1223.7 | 1328.1 | 1401.8 | 3180.6 | 3191.7 | 3244.0 | 3245.1 |

Table 15: Symmetry labels ( $C_2$  point group), calculated harmonic wavenumbers  $\tilde{\omega}_i$  (in  $\text{cm}^{-1}$ ), electric dipole transition moments ( $\mu_a, \mu_b, \mu_c$ , in Debye) in the principal axis frame and intensities  $I$  (in  $\text{km/mol}$ ), corresponding to the double harmonic approximation. Cartesian coordinates in the principal axis frame are given in Table 16. These data were calculated at the MP2/cc-pVTZ level of theory by the Gaussian 09 program package.

| Mode | Symmetry | $\tilde{\omega}_i$ | $\mu_a$                | $\mu_b$                | $\mu_c$                | $I$    |
|------|----------|--------------------|------------------------|------------------------|------------------------|--------|
| 1    | A        | 3226               | $3.24 \times 10^{-2}$  | 0                      | 0                      | 8.495  |
| 2    | A        | 3204               | $-5.07 \times 10^{-3}$ | 0                      | 0                      | 0.206  |
| 3    | A        | 1568               | $5.31 \times 10^{-2}$  | 0                      | 0                      | 11.063 |
| 4    | A        | 1390               | $-3.58 \times 10^{-2}$ | 0                      | 0                      | 4.468  |
| 5    | A        | 1181               | $5.74 \times 10^{-3}$  | 0                      | 0                      | 0.098  |
| 6    | A        | 997                | $-3.27 \times 10^{-2}$ | 0                      | 0                      | 2.670  |
| 7    | A        | 938                | $1.86 \times 10^{-2}$  | 0                      | 0                      | 0.814  |
| 8    | A        | 780                | $4.20 \times 10^{-2}$  | 0                      | 0                      | 3.451  |
| 9    | A        | 740                | $5.18 \times 10^{-2}$  | 0                      | 0                      | 4.977  |
| 10   | A        | 573                | $-8.35 \times 10^{-3}$ | 0                      | 0                      | 0.100  |
| 11   | A        | 523                | $7.19 \times 10^{-3}$  | 0                      | 0                      | 0.068  |
| 12   | A        | 448                | $1.47 \times 10^{-2}$  | 0                      | 0                      | 0.243  |
| 13   | A        | 204                | $-1.42 \times 10^{-3}$ | 0                      | 0                      | 0.001  |
| 14   | B        | 3221               | 0                      | $-2.31 \times 10^{-2}$ | $1.17 \times 10^{-2}$  | 5.420  |
| 15   | B        | 3197               | 0                      | $-9.64 \times 10^{-3}$ | $4.14 \times 10^{-3}$  | 0.882  |
| 16   | B        | 1610               | 0                      | $-6.25 \times 10^{-3}$ | $-3.60 \times 10^{-3}$ | 0.210  |
| 17   | B        | 1329               | 0                      | $6.28 \times 10^{-2}$  | $-2.24 \times 10^{-2}$ | 14.809 |
| 18   | B        | 1184               | 0                      | $-1.94 \times 10^{-2}$ | $-3.90 \times 10^{-3}$ | 1.162  |
| 19   | B        | 929                | 0                      | $-5.59 \times 10^{-3}$ | $-5.31 \times 10^{-3}$ | 0.139  |
| 20   | B        | 858                | 0                      | $-9.36 \times 10^{-3}$ | $3.42 \times 10^{-2}$  | 2.711  |
| 21   | B        | 702                | 0                      | $1.72 \times 10^{-2}$  | $2.35 \times 10^{-2}$  | 1.495  |
| 22   | B        | 632                | 0                      | $-1.33 \times 10^{-1}$ | $-2.02 \times 10^{-1}$ | 92.517 |
| 23   | B        | 315                | 0                      | $-1.94 \times 10^{-3}$ | $1.01 \times 10^{-2}$  | 0.083  |
| 24   | B        | 214                | 0                      | $1.00 \times 10^{-1}$  | $1.11 \times 10^{-1}$  | 12.041 |

Table 16: Cartesian coordinates (in bohr) expressed in the principal axis frame. These data were calculated at the MP2/cc-pVTZ level of theory by the Gaussian 09 program package.

| atom            | $a$     | $b$     | $c$     |
|-----------------|---------|---------|---------|
| S <sub>1</sub>  | 1.8031  | 1.8364  | 0.6517  |
| S <sub>2</sub>  | 1.8031  | -1.8364 | -0.6517 |
| C <sub>3</sub>  | -1.1220 | -2.7816 | 0.6283  |
| C <sub>4</sub>  | -3.1653 | -1.2539 | 0.5454  |
| C <sub>5</sub>  | -3.1653 | 1.2539  | -0.5454 |
| C <sub>6</sub>  | -1.1220 | 2.7816  | -0.6283 |
| H <sub>7</sub>  | -1.2229 | 4.6797  | -1.3822 |
| H <sub>8</sub>  | -1.2229 | -4.6797 | 1.3822  |
| H <sub>9</sub>  | -4.9295 | -1.9765 | 1.2870  |
| H <sub>10</sub> | -4.9295 | 1.9765  | -1.2870 |

Table 17: Calculated harmonic wavenumbers  $\tilde{\omega}_i$  (in  $\text{cm}^{-1}$ ) and IR intensities (in  $\text{km mol}^{-1}$ ) of ( $\text{D}_7\text{H}_8\text{H}_9\text{H}_{10}$ ) 1,2-dithiine obtained by the Gaussian 09 program package.

| Mode | Symmetry | $\tilde{\omega}_i$ | Intensity |
|------|----------|--------------------|-----------|
| 1    | A        | 3224               | 7.194     |
| 2    | A        | 3211               | 2.778     |
| 3    | A        | 3199               | 1.470     |
| 4    | A        | 2375               | 1.725     |
| 5    | A        | 1603               | 0.292     |
| 6    | A        | 1561               | 11.313    |
| 7    | A        | 1371               | 7.047     |
| 8    | A        | 1300               | 9.380     |
| 9    | A        | 1182               | 0.535     |
| 10   | A        | 1050               | 3.140     |
| 11   | A        | 937                | 0.212     |
| 12   | A        | 904                | 3.158     |
| 13   | A        | 873                | 1.937     |
| 14   | A        | 814                | 2.786     |
| 15   | A        | 741                | 9.090     |
| 16   | A        | 706                | 23.934    |
| 17   | A        | 695                | 0.198     |
| 18   | A        | 580                | 52.109    |
| 19   | A        | 573                | 0.273     |
| 20   | A        | 520                | 0.448     |
| 21   | A        | 443                | 0.285     |
| 22   | A        | 312                | 0.061     |
| 23   | A        | 207                | 5.577     |
| 24   | A        | 194                | 5.718     |

Table 18: Calculated harmonic wavenumbers  $\tilde{\omega}_i$  (in  $\text{cm}^{-1}$ ) and IR intensities (in  $\text{km mol}^{-1}$ ) of ( $\text{H}_7\text{H}_8\text{H}_9\text{D}_{10}$ ) 1,2-dithiine obtained by the Gaussian 09 program package.

| Mode | Symmetry | $\tilde{\omega}_i$ | Intensity |
|------|----------|--------------------|-----------|
| 1    | A        | 3223               | 7.280     |
| 2    | A        | 3214               | 3.726     |
| 3    | A        | 3201               | 0.187     |
| 4    | A        | 2370               | 1.508     |
| 5    | A        | 1594               | 0.967     |
| 6    | A        | 1564               | 10.991    |
| 7    | A        | 1373               | 5.682     |
| 8    | A        | 1284               | 11.541    |
| 9    | A        | 1183               | 0.669     |
| 10   | A        | 1028               | 3.952     |
| 11   | A        | 941                | 0.252     |
| 12   | A        | 891                | 0.353     |
| 13   | A        | 850                | 5.577     |
| 14   | A        | 840                | 2.576     |
| 15   | A        | 756                | 10.045    |
| 16   | A        | 735                | 5.787     |
| 17   | A        | 681                | 0.372     |
| 18   | A        | 597                | 50.994    |
| 19   | A        | 548                | 11.351    |
| 20   | A        | 501                | 6.835     |
| 21   | A        | 438                | 1.119     |
| 22   | A        | 313                | 0.150     |
| 23   | A        | 214                | 11.855    |
| 24   | A        | 200                | 0.021     |

Table 19: Calculated harmonic wavenumbers  $\tilde{\omega}_i$  (in  $\text{cm}^{-1}$ ) and IR intensities (in  $\text{km mol}^{-1}$ ) of ( $\text{D}_7\text{H}_8\text{H}_9\text{D}_{10}$ ) 1,2-dithiine obtained by the Gaussian 09 program package.

| Mode | Symmetry | $\tilde{\omega}_i$ | Intensity |
|------|----------|--------------------|-----------|
| 1    | A        | 3223               | 7.270     |
| 2    | A        | 3201               | 0.208     |
| 3    | A        | 2389               | 3.137     |
| 4    | A        | 2355               | 0.274     |
| 5    | A        | 1589               | 1.746     |
| 6    | A        | 1554               | 10.422    |
| 7    | A        | 1364               | 8.511     |
| 8    | A        | 1193               | 1.177     |
| 9    | A        | 1141               | 8.539     |
| 10   | A        | 941                | 0.206     |
| 11   | A        | 894                | 0.781     |
| 12   | A        | 873                | 1.058     |
| 13   | A        | 802                | 2.311     |
| 14   | A        | 761                | 6.137     |
| 15   | A        | 738                | 6.773     |
| 16   | A        | 694                | 12.258    |
| 17   | A        | 675                | 0.962     |
| 18   | A        | 575                | 26.693    |
| 19   | A        | 546                | 15.885    |
| 20   | A        | 494                | 10.044    |
| 21   | A        | 434                | 0.765     |
| 22   | A        | 310                | 0.084     |
| 23   | A        | 204                | 6.674     |
| 24   | A        | 193                | 4.409     |

Table 20: Calculated harmonic wavenumbers  $\tilde{\omega}_i$  (in  $\text{cm}^{-1}$ ) and IR intensities (in  $\text{km mol}^{-1}$ ) of ( $\text{D}_7\text{H}_8\text{D}_9\text{H}_{10}$ ) 1,2-dithiine obtained by the Gaussian 09 program package.

| Mode | Symmetry | $\tilde{\omega}_i$ | Intensity |
|------|----------|--------------------|-----------|
| 1    | A        | 3214               | 3.637     |
| 2    | A        | 3210               | 3.999     |
| 3    | A        | 2375               | 1.713     |
| 4    | A        | 2370               | 1.517     |
| 5    | A        | 1584               | 0.349     |
| 6    | A        | 1559               | 11.838    |
| 7    | A        | 1332               | 4.628     |
| 8    | A        | 1276               | 9.987     |
| 9    | A        | 1065               | 3.430     |
| 10   | A        | 943                | 0.721     |
| 11   | A        | 900                | 5.110     |
| 12   | A        | 846                | 7.663     |
| 13   | A        | 836                | 1.014     |
| 14   | A        | 807                | 2.732     |
| 15   | A        | 726                | 7.433     |
| 16   | A        | 683                | 0.664     |
| 17   | A        | 666                | 3.415     |
| 18   | A        | 576                | 23.964    |
| 19   | A        | 539                | 22.627    |
| 20   | A        | 499                | 7.131     |
| 21   | A        | 433                | 1.402     |
| 22   | A        | 310                | 0.089     |
| 23   | A        | 206                | 7.043     |
| 24   | A        | 192                | 4.219     |

Table 21: Calculated harmonic wavenumbers  $\tilde{\omega}_i$  (in  $\text{cm}^{-1}$ ) and IR intensities (in  $\text{km mol}^{-1}$ ) of ( $\text{H}_7\text{H}_8\text{D}_9\text{D}_{10}$ ) 1,2-dithiine obtained by the Gaussian 09 program package.

| Mode | Symmetry | $\tilde{\omega}_i$ | Intensity |
|------|----------|--------------------|-----------|
| 1    | A        | 3214               | 5.322     |
| 2    | A        | 2376               | 0.746     |
| 3    | A        | 1562               | 11.632    |
| 4    | A        | 1337               | 3.558     |
| 5    | A        | 1033               | 4.579     |
| 6    | A        | 858                | 0.015     |
| 7    | A        | 841                | 0.088     |
| 8    | A        | 730                | 6.839     |
| 9    | A        | 713                | 0.758     |
| 10   | A        | 552                | 0.066     |
| 11   | A        | 493                | 0.139     |
| 12   | A        | 430                | 0.163     |
| 13   | A        | 196                | 0.001     |
| 14   | B        | 3214               | 2.100     |
| 15   | B        | 2364               | 2.182     |
| 16   | B        | 1575               | 1.237     |
| 17   | B        | 1256               | 11.484    |
| 18   | B        | 970                | 0.595     |
| 19   | B        | 849                | 8.549     |
| 20   | B        | 827                | 8.068     |
| 21   | B        | 671                | 0.152     |
| 22   | B        | 526                | 59.237    |
| 23   | B        | 312                | 0.249     |
| 24   | B        | 214                | 11.695    |

Table 22: Calculated harmonic wavenumbers  $\tilde{\omega}_i$  (in  $\text{cm}^{-1}$ ) and IR intensities (in  $\text{km mol}^{-1}$ ) of ( $\text{D}_7\text{D}_8\text{H}_9\text{H}_{10}$ ) 1,2-dithiine obtained by the Gaussian 09 program package.

| Mode | Symmetry | $\tilde{\omega}_i$ | Intensity |
|------|----------|--------------------|-----------|
| 1    | A        | 3216               | 3.551     |
| 2    | A        | 2374               | 2.621     |
| 3    | A        | 1556               | 12.013    |
| 4    | A        | 1331               | 5.542     |
| 5    | A        | 1080               | 2.413     |
| 6    | A        | 904                | 0.428     |
| 7    | A        | 826                | 0.020     |
| 8    | A        | 725                | 7.461     |
| 9    | A        | 621                | 0.178     |
| 10   | A        | 572                | 0.074     |
| 11   | A        | 517                | 0.024     |
| 12   | A        | 437                | 0.259     |
| 13   | A        | 197                | 0.001     |
| 14   | B        | 3204               | 4.327     |
| 15   | B        | 2375               | 0.833     |
| 16   | B        | 1595               | 0.023     |
| 17   | B        | 1291               | 8.299     |
| 18   | B        | 951                | 2.280     |
| 19   | B        | 866                | 11.888    |
| 20   | B        | 788                | 3.480     |
| 21   | B        | 691                | 0.569     |
| 22   | B        | 567                | 56.370    |
| 23   | B        | 309                | 0.076     |
| 24   | B        | 187                | 10.464    |

Table 23: Calculated harmonic wavenumbers  $\tilde{\omega}_i$  (in  $\text{cm}^{-1}$ ) and IR intensities (in  $\text{km mol}^{-1}$ ) of ( $\text{D}_7\text{H}_8\text{D}_9\text{D}_{10}$ ) 1,2-dithiine obtained by the Gaussian 09 program package.

| Mode | Symmetry | $\tilde{\omega}_i$ | Intensity |
|------|----------|--------------------|-----------|
| 1    | A        | 3214               | 3.712     |
| 2    | A        | 2390               | 2.877     |
| 3    | A        | 2371               | 1.232     |
| 4    | A        | 2354               | 0.720     |
| 5    | A        | 1570               | 2.876     |
| 6    | A        | 1554               | 10.091    |
| 7    | A        | 1310               | 6.375     |
| 8    | A        | 1139               | 8.935     |
| 9    | A        | 985                | 1.729     |
| 10   | A        | 872                | 1.238     |
| 11   | A        | 847                | 6.224     |
| 12   | A        | 838                | 1.040     |
| 13   | A        | 796                | 2.055     |
| 14   | A        | 751                | 0.802     |
| 15   | A        | 716                | 7.165     |
| 16   | A        | 672                | 0.745     |
| 17   | A        | 660                | 0.747     |
| 18   | A        | 551                | 0.274     |
| 19   | A        | 513                | 50.779    |
| 20   | A        | 490                | 0.974     |
| 21   | A        | 426                | 0.217     |
| 22   | A        | 308                | 0.141     |
| 23   | A        | 203                | 8.046     |
| 24   | A        | 190                | 2.993     |

Table 24: Calculated harmonic wavenumbers  $\tilde{\omega}_i$  (in  $\text{cm}^{-1}$ ) and IR intensities (in  $\text{km mol}^{-1}$ ) of ( $\text{D}_7\text{D}_8\text{H}_9\text{D}_{10}$ ) 1,2-dithiine obtained by the Gaussian 09 program package.

| Mode | Symmetry | $\tilde{\omega}_i$ | Intensity |
|------|----------|--------------------|-----------|
| 1    | A        | 3210               | 3.920     |
| 2    | A        | 2390               | 3.084     |
| 3    | A        | 2375               | 1.799     |
| 4    | A        | 2355               | 0.255     |
| 5    | A        | 1578               | 0.821     |
| 6    | A        | 1552               | 11.662    |
| 7    | A        | 1314               | 6.583     |
| 8    | A        | 1170               | 7.418     |
| 9    | A        | 973                | 1.660     |
| 10   | A        | 903                | 5.573     |
| 11   | A        | 856                | 1.157     |
| 12   | A        | 822                | 0.180     |
| 13   | A        | 782                | 2.524     |
| 14   | A        | 743                | 0.229     |
| 15   | A        | 720                | 7.123     |
| 16   | A        | 674                | 0.497     |
| 17   | A        | 620                | 0.185     |
| 18   | A        | 570                | 18.951    |
| 19   | A        | 537                | 23.910    |
| 20   | A        | 493                | 9.916     |
| 21   | A        | 429                | 0.968     |
| 22   | A        | 308                | 0.072     |
| 23   | A        | 194                | 0.137     |
| 24   | A        | 187                | 10.236    |

Table 25: Calculated harmonic wavenumbers  $\tilde{\omega}_i$  (in  $\text{cm}^{-1}$ ) and IR intensities (in  $\text{km mol}^{-1}$ ) of ( $\text{D}_7\text{D}_8\text{D}_9\text{D}_{10}$ ) 1,2-dithiine obtained by the Gaussian 09 program package.

| Mode | Symmetry | $\tilde{\omega}_i$ | Intensity |
|------|----------|--------------------|-----------|
| 1    | A        | 2392               | 3.214     |
| 2    | A        | 2359               | 0.343     |
| 3    | A        | 1551               | 12.558    |
| 4    | A        | 1216               | 7.846     |
| 5    | A        | 845                | 0.103     |
| 6    | A        | 821                | 0.009     |
| 7    | A        | 760                | 0.052     |
| 8    | A        | 707                | 7.283     |
| 9    | A        | 620                | 0.114     |
| 10   | A        | 549                | 0.025     |
| 11   | A        | 487                | 0.096     |
| 12   | A        | 421                | 0.191     |
| 13   | A        | 191                | 0.001     |
| 14   | B        | 2387               | 2.658     |
| 15   | B        | 2351               | 0.519     |
| 16   | B        | 1558               | 0.578     |
| 17   | B        | 1058               | 6.231     |
| 18   | B        | 885                | 0.226     |
| 19   | B        | 777                | 2.269     |
| 20   | B        | 728                | 0.459     |
| 21   | B        | 665                | 0.042     |
| 22   | B        | 505                | 49.335    |
| 23   | B        | 306                | 0.097     |
| 24   | B        | 187                | 10.271    |

Table 26: Equilibrium ( $A_e$ ,  $B_e$  and  $C_e$ , in  $\text{cm}^{-1}$ ) rotational constants for various deuterated isotopomers of 1,2-dithiine (MP2/cc-pVTZ level of theory) obtained by the Gaussian 09 program package.

| isotopomer                                        | $A_e$    | $B_e$    | $C_e$    |
|---------------------------------------------------|----------|----------|----------|
| ( $\text{D}_7\text{H}_8\text{H}_9\text{H}_{10}$ ) | 0.106700 | 0.102659 | 0.057604 |
| ( $\text{H}_7\text{H}_8\text{H}_9\text{D}_{10}$ ) | 0.110264 | 0.098861 | 0.057341 |
| ( $\text{D}_7\text{H}_8\text{H}_9\text{D}_{10}$ ) | 0.106404 | 0.097764 | 0.056097 |
| ( $\text{D}_7\text{H}_8\text{D}_9\text{H}_{10}$ ) | 0.105423 | 0.098524 | 0.056084 |
| ( $\text{H}_7\text{H}_8\text{D}_9\text{D}_{10}$ ) | 0.108814 | 0.095125 | 0.055863 |
| ( $\text{D}_7\text{D}_8\text{H}_9\text{H}_{10}$ ) | 0.102388 | 0.102041 | 0.056313 |
| ( $\text{D}_7\text{H}_8\text{D}_9\text{D}_{10}$ ) | 0.104422 | 0.094608 | 0.054677 |
| ( $\text{D}_7\text{D}_8\text{H}_9\text{D}_{10}$ ) | 0.101846 | 0.097434 | 0.054868 |
| ( $\text{D}_7\text{D}_8\text{D}_9\text{D}_{10}$ ) | 0.100140 | 0.094262 | 0.053517 |

Table 27: Rotational transition frequencies  $\nu_{obs}$  for the *ground state* of dithiine.  $J''$ ,  $K_a''$  and  $K_c''$  are lower state quantum numbers,  $J'$ ,  $K_a'$  and  $K_c'$  are upper state quantum numbers,  $\nu_{obs.}$  = observed frequency,  $\nu_{cal.}$  = frequency calculated with the parameters in Table 10. All frequencies are given in MHz.

Table 27: Rotational transitions for the *ground state* of dithiine.

| $J'$ | $K_a'$ | $K_c'$ | $J''$ | $K_a''$ | $K_c''$ | $\nu_{obs}$<br>/MHz | $(\nu_{obs} - \nu_{cal})$<br>/MHz |
|------|--------|--------|-------|---------|---------|---------------------|-----------------------------------|
| 2    | 1      | 2      | 1     | 1       | 1       | 8370.843            | 0.004                             |
| 2    | 0      | 2      | 1     | 0       | 1       | 8568.786            | 0.002                             |
| 5    | 2      | 3      | 5     | 2       | 4       | 10104.868           | 0.004                             |
| 2    | 1      | 1      | 1     | 1       | 0       | 11064.516           | 0.003                             |
| 3    | 1      | 3      | 2     | 1       | 2       | 11979.432           | 0.006                             |
| 3    | 0      | 3      | 2     | 0       | 2       | 12003.160           | 0.003                             |
| 6    | 2      | 4      | 6     | 2       | 5       | 13048.281           | 0.000                             |
| 6    | 3      | 4      | 6     | 1       | 5       | 13053.240           | 0.012                             |
| 5    | 2      | 4      | 5     | 0       | 5       | 13074.712           | 0.000                             |
| 2    | 2      | 0      | 1     | 0       | 1       | 14454.321           | 0.002                             |
| 3    | 2      | 2      | 2     | 2       | 1       | 14576.495           | 0.008                             |
| 3    | 1      | 2      | 2     | 1       | 1       | 15121.322           | 0.001                             |
| 4    | 1      | 4      | 3     | 1       | 3       | 15501.775           | 0.002                             |
| 4    | 0      | 4      | 3     | 0       | 3       | 15503.509           | 0.003                             |
| 3    | 2      | 1      | 2     | 2       | 0       | 17149.834           | 0.006                             |
| 13   | 7      | 7      | 12    | 7       | 6       | 64606.030           | 0.003                             |
| 13   | 6      | 7      | 12    | 6       | 6       | 64610.760           | 0.007                             |
| 18   | 0      | 18     | 17    | 0       | 17      | 64666.100           | 0.000                             |
| 18   | 1      | 18     | 17    | 1       | 17      | 64666.100           | 0.000                             |
| 15   | 5      | 11     | 14    | 5       | 10      | 65770.400           | 0.001                             |
| 15   | 4      | 11     | 14    | 4       | 10      | 65770.400           | 0.001                             |
| 16   | 3      | 13     | 15    | 3       | 12      | 66370.270           | 0.006                             |
| 16   | 4      | 13     | 15    | 4       | 12      | 66370.270           | 0.006                             |
| 17   | 2      | 15     | 16    | 2       | 14      | 66972.200           | 0.006                             |
| 17   | 3      | 15     | 16    | 3       | 14      | 66972.200           | 0.006                             |
| 13   | 8      | 6      | 12    | 8       | 5       | 67549.730           | 0.003                             |
| 18   | 2      | 17     | 17    | 2       | 16      | 67574.740           | 0.001                             |
| 18   | 1      | 17     | 17    | 1       | 16      | 67574.740           | 0.001                             |
| 13   | 7      | 6      | 12    | 7       | 5       | 67638.950           | -0.013                            |
| 14   | 7      | 8      | 13    | 7       | 7       | 68104.560           | -0.001                            |
| 14   | 6      | 8      | 13    | 6       | 7       | 68105.055           | 0.005                             |
| 19   | 1      | 19     | 18    | 1       | 18      | 68177.350           | 0.003                             |
| 19   | 0      | 19     | 18    | 0       | 18      | 68177.350           | 0.003                             |
| 12   | 10     | 2      | 11    | 10      | 1       | 68331.025           | 0.000                             |
| 15   | 6      | 10     | 14    | 6       | 9       | 68685.140           | 0.003                             |
| 15   | 5      | 10     | 14    | 5       | 9       | 68685.140           | 0.003                             |
| 16   | 5      | 12     | 15    | 5       | 11      | 69280.930           | 0.003                             |
| 12   | 9      | 3      | 11    | 9       | 2       | 69977.420           | 0.012                             |
| 13   | 9      | 5      | 12    | 9       | 4       | 70292.700           | -0.002                            |

Continuation, see next page

Continuation of Table 27: ground state of dithiine.

| $J'$ | $K'_a$ | $K'_c$ | $J''$ | $K''_a$ | $K''_c$ | $\nu_{obs}$ | $(\nu_{obs} - \nu_{cal})$ |
|------|--------|--------|-------|---------|---------|-------------|---------------------------|
|      |        |        |       |         |         | /MHz        | /MHz                      |
| 18   | 3      | 16     | 17    | 3       | 15      | 70483.465   | 0.006                     |
| 18   | 2      | 16     | 17    | 2       | 15      | 70483.465   | 0.006                     |
| 14   | 8      | 7      | 13    | 8       | 6       | 71052.370   | 0.008                     |
| 19   | 1      | 18     | 18    | 1       | 17      | 71085.980   | 0.001                     |
| 19   | 2      | 18     | 18    | 2       | 17      | 71085.980   | 0.001                     |
| 13   | 12     | 2      | 12    | 12      | 1       | 71794.910   | -0.004                    |
| 13   | 12     | 1      | 12    | 12      | 0       | 71905.100   | 0.004                     |
| 16   | 6      | 11     | 15    | 6       | 10      | 72194.190   | 0.010                     |
| 16   | 5      | 11     | 15    | 5       | 10      | 72194.190   | 0.010                     |
| 13   | 11     | 3      | 12    | 11      | 2       | 72407.600   | 0.008                     |
| 17   | 4      | 13     | 16    | 4       | 12      | 72791.615   | -0.001                    |
| 17   | 5      | 13     | 16    | 5       | 12      | 72791.615   | -0.001                    |
| 18   | 3      | 15     | 17    | 3       | 14      | 73392.530   | 0.004                     |
| 18   | 4      | 15     | 17    | 4       | 14      | 73392.530   | 0.004                     |
| 14   | 9      | 6      | 13    | 9       | 5       | 73991.730   | -0.004                    |
| 19   | 2      | 17     | 18    | 2       | 16      | 73994.660   | 0.003                     |
| 19   | 3      | 17     | 18    | 3       | 16      | 73994.660   | 0.003                     |
| 14   | 8      | 6      | 13    | 8       | 5       | 74179.760   | -0.001                    |
| 15   | 8      | 8      | 14    | 8       | 7       | 74544.350   | 0.005                     |
| 15   | 7      | 8      | 14    | 7       | 7       | 74545.780   | 0.006                     |
| 20   | 1      | 19     | 19    | 1       | 18      | 74597.140   | 0.003                     |
| 20   | 2      | 19     | 19    | 2       | 18      | 74597.140   | 0.003                     |
| 13   | 10     | 3      | 12    | 10      | 2       | 75684.940   | 0.011                     |
| 17   | 5      | 12     | 16    | 5       | 11      | 75703.813   | -0.002                    |
| 17   | 6      | 12     | 16    | 6       | 11      | 75703.813   | -0.002                    |
| 18   | 4      | 14     | 17    | 4       | 13      | 76302.390   | 0.002                     |
| 18   | 5      | 14     | 17    | 5       | 13      | 76302.390   | 0.002                     |
| 14   | 10     | 5      | 13    | 10      | 4       | 76590.070   | 0.004                     |
| 19   | 3      | 16     | 18    | 3       | 15      | 76903.600   | -0.006                    |
| 19   | 4      | 16     | 18    | 4       | 15      | 76903.600   | -0.006                    |
| 14   | 13     | 2      | 13    | 13      | 1       | 77267.530   | 0.002                     |
| 20   | 2      | 18     | 19    | 2       | 17      | 77505.785   | 0.006                     |
| 20   | 3      | 18     | 19    | 3       | 17      | 77505.785   | 0.006                     |
| 15   | 9      | 7      | 14    | 9       | 6       | 77506.330   | 0.003                     |
| 15   | 8      | 7      | 14    | 8       | 6       | 77536.020   | 0.007                     |
| 14   | 9      | 5      | 13    | 9       | 4       | 77956.830   | -0.006                    |
| 14   | 12     | 3      | 13    | 12      | 2       | 77993.800   | 0.008                     |
| 14   | 11     | 4      | 13    | 11      | 3       | 78027.400   | -0.004                    |
| 21   | 1      | 20     | 20    | 1       | 19      | 78108.210   | 0.002                     |
| 21   | 2      | 20     | 20    | 2       | 19      | 78108.210   | 0.002                     |
| 17   | 7      | 11     | 16    | 7       | 10      | 78619.850   | 0.003                     |
| 17   | 6      | 11     | 16    | 6       | 10      | 78619.850   | 0.003                     |
| 14   | 12     | 2      | 13    | 12      | 1       | 78756.550   | -0.008                    |
| 18   | 5      | 13     | 17    | 5       | 12      | 79213.810   | -0.003                    |
| 18   | 6      | 13     | 17    | 6       | 12      | 79213.810   | -0.003                    |
| 19   | 4      | 15     | 18    | 4       | 14      | 79813.195   | 0.001                     |

Continuation, see next page

Continuation of Table 27: ground state of dithiine.

| $J'$ | $K'_a$ | $K'_c$ | $J''$ | $K''_a$ | $K''_c$ | $\nu_{obs}$ | $(\nu_{obs} - \nu_{cal})$ |
|------|--------|--------|-------|---------|---------|-------------|---------------------------|
|      |        |        |       |         |         | /MHz        | /MHz                      |
| 19   | 5      | 15     | 18    | 5       | 14      | 79813.195   | 0.001                     |
| 20   | 3      | 17     | 19    | 3       | 16      | 80414.625   | -0.006                    |
| 20   | 4      | 17     | 19    | 4       | 16      | 80414.625   | -0.006                    |
| 15   | 10     | 6      | 14    | 10      | 5       | 80422.930   | 0.003                     |
| 15   | 9      | 6      | 14    | 9       | 5       | 80787.990   | -0.010                    |
| 16   | 8      | 8      | 15    | 8       | 7       | 80995.160   | -0.003                    |
| 21   | 2      | 19     | 20    | 2       | 18      | 81016.825   | 0.005                     |
| 21   | 3      | 19     | 20    | 3       | 18      | 81016.825   | 0.005                     |
| 14   | 11     | 3      | 13    | 11      | 2       | 81158.460   | -0.006                    |
| 14   | 10     | 4      | 13    | 10      | 3       | 81348.960   | 0.004                     |
| 22   | 1      | 21     | 21    | 1       | 20      | 81619.180   | -0.008                    |
| 22   | 2      | 21     | 21    | 2       | 20      | 81619.180   | -0.008                    |
| 18   | 7      | 12     | 17    | 7       | 11      | 82128.165   | 0.003                     |
| 18   | 6      | 12     | 17    | 6       | 11      | 82128.165   | 0.003                     |
| 23   | 0      | 23     | 22    | 0       | 22      | 82221.450   | -0.002                    |
| 23   | 1      | 23     | 22    | 1       | 22      | 82221.450   | -0.002                    |
| 19   | 5      | 14     | 18    | 5       | 13      | 82724.030   | 0.000                     |
| 19   | 6      | 14     | 18    | 6       | 13      | 82724.030   | 0.000                     |
| 15   | 14     | 2      | 14    | 14      | 1       | 82732.955   | 0.002                     |
| 15   | 14     | 1      | 14    | 14      | 0       | 82767.520   | -0.004                    |
| 15   | 11     | 5      | 14    | 11      | 4       | 82815.530   | -0.003                    |
| 20   | 4      | 16     | 19    | 4       | 15      | 83324.000   | 0.001                     |
| 20   | 5      | 16     | 19    | 5       | 15      | 83324.000   | 0.001                     |
| 15   | 13     | 3      | 14    | 13      | 2       | 83531.340   | 0.006                     |
| 21   | 3      | 18     | 20    | 3       | 17      | 83925.590   | 0.000                     |
| 21   | 4      | 18     | 20    | 4       | 17      | 83925.590   | 0.000                     |
| 16   | 10     | 7      | 15    | 10      | 6       | 83967.010   | 0.000                     |
| 15   | 13     | 2      | 14    | 13      | 1       | 84023.290   | 0.000                     |
| 16   | 9      | 7      | 15    | 9       | 6       | 84032.820   | 0.000                     |
| 22   | 2      | 20     | 21    | 2       | 19      | 84527.770   | -0.004                    |
| 22   | 3      | 20     | 21    | 3       | 19      | 84527.770   | -0.004                    |
| 15   | 10     | 5      | 14    | 10      | 4       | 84817.880   | -0.008                    |
| 18   | 8      | 11     | 17    | 8       | 10      | 85047.935   | 0.001                     |
| 18   | 7      | 11     | 17    | 7       | 10      | 85047.935   | 0.000                     |
| 23   | 1      | 22     | 22    | 1       | 21      | 85130.070   | -0.002                    |
| 23   | 2      | 22     | 22    | 2       | 21      | 85130.070   | -0.002                    |
| 41   | 12     | 29     | 41    | 12      | 30      | 85573.999   | 0.004                     |
| 41   | 13     | 29     | 41    | 11      | 30      | 85573.999   | 0.004                     |
| 40   | 11     | 29     | 40    | 11      | 30      | 85601.695   | -0.004                    |
| 40   | 12     | 29     | 40    | 10      | 30      | 85601.695   | -0.004                    |
| 39   | 10     | 29     | 39    | 10      | 30      | 85627.622   | -0.004                    |
| 39   | 11     | 29     | 39    | 9       | 30      | 85627.622   | -0.004                    |
| 19   | 6      | 13     | 18    | 6       | 12      | 85637.150   | -0.003                    |
| 19   | 7      | 13     | 18    | 7       | 12      | 85637.150   | -0.003                    |
| 38   | 9      | 29     | 38    | 9       | 30      | 85651.869   | 0.009                     |
| 38   | 10     | 29     | 38    | 8       | 30      | 85651.869   | 0.009                     |

Continuation, see next page

Continuation of Table 27: ground state of dithiine.

| $J'$ | $K'_a$ | $K'_c$ | $J''$ | $K''_a$ | $K''_c$ | $\nu_{obs}$ | $(\nu_{obs} - \nu_{cal})$ |
|------|--------|--------|-------|---------|---------|-------------|---------------------------|
|      |        |        |       |         |         | /MHz        | /MHz                      |
| 37   | 8      | 29     | 37    | 8       | 30      | 85674.477   | -0.006                    |
| 37   | 9      | 29     | 37    | 7       | 30      | 85674.477   | -0.006                    |
| 36   | 7      | 29     | 36    | 7       | 30      | 85695.565   | -0.008                    |
| 36   | 8      | 29     | 36    | 6       | 30      | 85695.565   | -0.008                    |
| 35   | 6      | 29     | 35    | 6       | 30      | 85715.200   | -0.006                    |
| 35   | 7      | 29     | 35    | 5       | 30      | 85715.200   | -0.006                    |
| 24   | 0      | 24     | 23    | 0       | 23      | 85732.235   | 0.000                     |
| 24   | 1      | 24     | 23    | 1       | 23      | 85732.235   | 0.000                     |
| 34   | 5      | 29     | 34    | 5       | 30      | 85733.448   | -0.008                    |
| 34   | 6      | 29     | 34    | 4       | 30      | 85733.448   | -0.008                    |
| 20   | 5      | 15     | 19    | 5       | 14      | 86234.375   | -0.001                    |
| 20   | 6      | 15     | 19    | 6       | 14      | 86234.375   | -0.001                    |
| 15   | 12     | 3      | 14    | 12      | 2       | 86439.510   | -0.002                    |
| 16   | 11     | 6      | 15    | 11      | 5       | 86830.990   | -0.005                    |
| 21   | 4      | 17     | 20    | 4       | 16      | 86834.775   | -0.003                    |
| 21   | 5      | 17     | 20    | 5       | 16      | 86834.775   | -0.003                    |
| 22   | 3      | 19     | 21    | 3       | 18      | 87436.470   | -0.005                    |
| 22   | 4      | 19     | 21    | 4       | 18      | 87436.470   | -0.005                    |
| 17   | 10     | 8      | 16    | 10      | 7       | 87446.750   | -0.007                    |
| 17   | 9      | 8      | 16    | 9       | 7       | 87456.150   | 0.003                     |
| 16   | 10     | 6      | 15    | 10      | 5       | 87486.720   | -0.001                    |
| 15   | 11     | 4      | 14    | 11      | 3       | 87570.070   | -0.009                    |
| 23   | 2      | 21     | 22    | 2       | 20      | 88038.635   | -0.001                    |
| 23   | 3      | 21     | 22    | 3       | 20      | 88038.635   | -0.001                    |
| 16   | 15     | 2      | 15    | 15      | 1       | 88194.400   | -0.004                    |
| 16   | 15     | 1      | 15    | 15      | 0       | 88213.270   | 0.000                     |
| 41   | 11     | 30     | 41    | 11      | 31      | 88510.601   | 0.001                     |
| 41   | 12     | 30     | 41    | 10      | 31      | 88510.601   | 0.001                     |
| 40   | 10     | 30     | 40    | 10      | 31      | 88536.227   | -0.006                    |
| 40   | 11     | 30     | 40    | 9       | 31      | 88536.227   | -0.006                    |
| 19   | 8      | 12     | 18    | 8       | 11      | 88554.380   | -0.002                    |
| 19   | 7      | 12     | 18    | 7       | 11      | 88554.380   | -0.002                    |
| 39   | 9      | 30     | 39    | 9       | 31      | 88560.242   | -0.005                    |
| 39   | 10     | 30     | 39    | 8       | 31      | 88560.242   | -0.005                    |
| 38   | 8      | 30     | 38    | 8       | 31      | 88582.707   | -0.011                    |
| 38   | 9      | 30     | 38    | 7       | 31      | 88582.707   | -0.011                    |
| 37   | 7      | 30     | 37    | 7       | 31      | 88603.713   | -0.006                    |
| 37   | 8      | 30     | 37    | 6       | 31      | 88603.713   | -0.006                    |
| 36   | 6      | 30     | 36    | 6       | 31      | 88623.316   | -0.004                    |
| 36   | 7      | 30     | 36    | 5       | 31      | 88623.316   | -0.004                    |
| 24   | 1      | 23     | 23    | 1       | 22      | 88640.850   | -0.005                    |
| 24   | 2      | 23     | 23    | 2       | 22      | 88640.850   | -0.005                    |
| 35   | 5      | 30     | 35    | 5       | 31      | 88641.592   | 0.001                     |
| 35   | 6      | 30     | 35    | 4       | 31      | 88641.592   | 0.001                     |
| 34   | 4      | 30     | 34    | 4       | 31      | 88658.593   | -0.005                    |
| 34   | 5      | 30     | 34    | 3       | 31      | 88658.593   | -0.005                    |

Continuation, see next page

Continuation of Table 27: ground state of dithiine.

| $J'$ | $K'_a$ | $K'_c$ | $J''$ | $K''_a$ | $K''_c$ | $\nu_{obs}$ | $(\nu_{obs} - \nu_{cal})$ |
|------|--------|--------|-------|---------|---------|-------------|---------------------------|
|      |        |        |       |         |         | /MHz        | /MHz                      |
| 33   | 3      | 30     | 33    | 3       | 31      | 88674.407   | 0.002                     |
| 33   | 4      | 30     | 33    | 2       | 31      | 88674.407   | 0.002                     |
| 32   | 2      | 30     | 32    | 2       | 31      | 88689.075   | -0.001                    |
| 32   | 3      | 30     | 32    | 1       | 31      | 88689.075   | -0.001                    |
| 31   | 1      | 30     | 31    | 1       | 31      | 88702.672   | 0.002                     |
| 31   | 2      | 30     | 31    | 0       | 31      | 88702.672   | 0.002                     |
| 16   | 12     | 5      | 15    | 12      | 4       | 88954.570   | -0.007                    |
| 16   | 14     | 3      | 15    | 14      | 2       | 89033.730   | -0.005                    |
| 20   | 6      | 14     | 19    | 6       | 13      | 89146.570   | -0.006                    |
| 20   | 7      | 14     | 19    | 7       | 13      | 89146.570   | -0.006                    |
| 25   | 0      | 25     | 24    | 0       | 24      | 89242.910   | -0.002                    |
| 25   | 1      | 25     | 24    | 1       | 24      | 89242.910   | -0.002                    |
| 16   | 14     | 2      | 15    | 14      | 1       | 89339.030   | -0.003                    |
| 16   | 13     | 4      | 15    | 13      | 3       | 89593.125   | 0.004                     |
| 21   | 5      | 16     | 20    | 5       | 15      | 89744.790   | 0.001                     |
| 21   | 6      | 16     | 20    | 6       | 15      | 89744.790   | 0.001                     |
| 22   | 4      | 18     | 21    | 4       | 17      | 90345.510   | -0.002                    |
| 22   | 5      | 18     | 21    | 5       | 17      | 90345.510   | -0.002                    |
| 17   | 11     | 7      | 16    | 11      | 6       | 90431.440   | -0.007                    |
| 17   | 10     | 7      | 16    | 10      | 6       | 90567.480   | -0.001                    |
| 18   | 10     | 9      | 17    | 10      | 8       | 90927.660   | -0.005                    |
| 18   | 9      | 9      | 17    | 9       | 8       | 90928.800   | -0.005                    |
| 23   | 3      | 20     | 22    | 3       | 19      | 90947.280   | 0.003                     |
| 23   | 4      | 20     | 22    | 4       | 19      | 90947.280   | 0.003                     |
| 42   | 11     | 31     | 42    | 11      | 32      | 91419.219   | -0.005                    |
| 42   | 12     | 31     | 42    | 10      | 32      | 91419.219   | -0.005                    |
| 41   | 10     | 31     | 41    | 10      | 32      | 91444.612   | -0.002                    |
| 41   | 11     | 31     | 41    | 9       | 32      | 91444.612   | -0.002                    |
| 40   | 9      | 31     | 40    | 9       | 32      | 91468.451   | -0.002                    |
| 40   | 10     | 31     | 40    | 8       | 32      | 91468.451   | -0.002                    |
| 19   | 9      | 11     | 18    | 9       | 10      | 91479.040   | 0.000                     |
| 19   | 8      | 11     | 18    | 8       | 10      | 91479.040   | -0.003                    |
| 39   | 8      | 31     | 39    | 8       | 32      | 91490.808   | -0.004                    |
| 39   | 9      | 31     | 39    | 7       | 32      | 91490.808   | -0.004                    |
| 38   | 7      | 31     | 38    | 7       | 32      | 91511.750   | -0.008                    |
| 38   | 8      | 31     | 38    | 6       | 32      | 91511.750   | -0.008                    |
| 37   | 6      | 31     | 37    | 6       | 32      | 91531.350   | -0.006                    |
| 37   | 7      | 31     | 37    | 5       | 32      | 91531.350   | -0.006                    |
| 35   | 4      | 31     | 35    | 4       | 32      | 91566.766   | -0.001                    |
| 35   | 5      | 31     | 35    | 3       | 32      | 91566.766   | -0.001                    |
| 34   | 3      | 31     | 34    | 3       | 32      | 91582.700   | -0.001                    |
| 34   | 4      | 31     | 34    | 2       | 32      | 91582.700   | -0.001                    |
| 33   | 2      | 31     | 33    | 2       | 32      | 91597.537   | 0.004                     |
| 33   | 3      | 31     | 33    | 1       | 32      | 91597.537   | 0.004                     |
| 16   | 13     | 3      | 15    | 13      | 2       | 91598.780   | -0.003                    |
| 16   | 11     | 5      | 15    | 11      | 4       | 91651.860   | -0.004                    |

Continuation, see next page

Continuation of Table 27: ground state of dithiine.

| $J'$ | $K'_a$ | $K'_c$ | $J''$ | $K''_a$ | $K''_c$ | $\nu_{obs}$ | $(\nu_{obs} - \nu_{cal})$ |
|------|--------|--------|-------|---------|---------|-------------|---------------------------|
|      |        |        |       |         |         | /MHz        | /MHz                      |
| 20   | 7      | 13     | 19    | 7       | 12      | 92061.970   | 0.004                     |
| 20   | 8      | 13     | 19    | 8       | 12      | 92061.970   | 0.004                     |
| 25   | 1      | 24     | 24    | 1       | 23      | 92151.530   | -0.003                    |
| 25   | 2      | 24     | 24    | 2       | 23      | 92151.530   | -0.003                    |
| 21   | 7      | 15     | 20    | 7       | 14      | 92656.275   | 0.000                     |
| 21   | 6      | 15     | 20    | 6       | 14      | 92656.275   | 0.000                     |
| 26   | 0      | 26     | 25    | 0       | 25      | 92753.480   | 0.001                     |
| 26   | 1      | 26     | 25    | 1       | 25      | 92753.480   | 0.001                     |
| 17   | 12     | 6      | 16    | 12      | 5       | 93200.525   | 0.001                     |
| 22   | 5      | 17     | 21    | 5       | 16      | 93255.230   | 0.004                     |
| 22   | 6      | 17     | 21    | 6       | 16      | 93255.230   | 0.004                     |
| 16   | 12     | 4      | 15    | 12      | 3       | 93530.430   | 0.003                     |
| 17   | 16     | 2      | 16    | 16      | 1       | 93653.810   | 0.009                     |
| 17   | 16     | 1      | 16    | 16      | 0       | 93663.950   | -0.006                    |
| 23   | 4      | 19     | 22    | 4       | 18      | 93856.190   | 0.003                     |
| 23   | 5      | 19     | 22    | 5       | 18      | 93856.190   | 0.003                     |
| 18   | 11     | 8      | 17    | 11      | 7       | 93911.340   | 0.000                     |
| 18   | 10     | 8      | 17    | 10      | 7       | 93932.930   | 0.000                     |
| 17   | 11     | 6      | 16    | 11      | 5       | 94290.870   | -0.004                    |
| 44   | 12     | 32     | 44    | 12      | 33      | 94300.842   | -0.003                    |
| 44   | 13     | 32     | 44    | 11      | 33      | 94300.842   | -0.003                    |
| 43   | 11     | 32     | 43    | 11      | 33      | 94327.595   | 0.001                     |
| 43   | 12     | 32     | 43    | 10      | 33      | 94327.595   | 0.001                     |
| 42   | 10     | 32     | 42    | 10      | 33      | 94352.787   | -0.001                    |
| 42   | 11     | 32     | 42    | 9       | 33      | 94352.787   | -0.001                    |
| 41   | 9      | 32     | 41    | 9       | 33      | 94376.481   | -0.013                    |
| 41   | 10     | 32     | 41    | 8       | 33      | 94376.481   | -0.013                    |
| 13   | 9      | 4      | 12    | 7       | 5       | 94397.640   | 0.001                     |
| 40   | 8      | 32     | 40    | 8       | 33      | 94398.771   | -0.005                    |
| 40   | 9      | 32     | 40    | 7       | 33      | 94398.771   | -0.005                    |
| 39   | 7      | 32     | 39    | 7       | 33      | 94419.689   | -0.008                    |
| 39   | 8      | 32     | 39    | 6       | 33      | 94419.689   | -0.008                    |
| 38   | 6      | 32     | 38    | 6       | 33      | 94439.319   | -0.001                    |
| 38   | 7      | 32     | 38    | 5       | 33      | 94439.319   | -0.001                    |
| 36   | 4      | 32     | 36    | 4       | 33      | 94474.905   | 0.001                     |
| 36   | 5      | 32     | 36    | 3       | 33      | 94474.905   | 0.001                     |
| 35   | 3      | 32     | 35    | 3       | 33      | 94490.988   | 0.007                     |
| 35   | 4      | 32     | 35    | 2       | 33      | 94490.988   | 0.007                     |
| 34   | 2      | 32     | 34    | 2       | 33      | 94505.987   | 0.000                     |
| 34   | 3      | 32     | 34    | 1       | 33      | 94505.987   | 0.000                     |
| 17   | 15     | 3      | 16    | 15      | 2       | 94512.320   | 0.006                     |
| 17   | 15     | 2      | 16    | 15      | 1       | 94696.060   | -0.001                    |
| 20   | 9      | 12     | 19    | 9       | 11      | 94982.940   | 0.003                     |
| 20   | 8      | 12     | 19    | 8       | 11      | 94982.940   | 0.003                     |
| 17   | 13     | 5      | 16    | 13      | 4       | 94996.725   | -0.003                    |
| 25   | 2      | 23     | 24    | 2       | 22      | 95060.065   | 0.004                     |

Continuation, see next page

Continuation of Table 27: ground state of dithiine.

| $J'$ | $K'_a$ | $K'_c$ | $J''$ | $K''_a$ | $K''_c$ | $\nu_{obs}$ | $(\nu_{obs} - \nu_{cal})$ |
|------|--------|--------|-------|---------|---------|-------------|---------------------------|
|      |        |        |       |         |         | /MHz        | /MHz                      |
| 25   | 3      | 23     | 24    | 3       | 22      | 95060.065   | 0.004                     |
| 17   | 14     | 4      | 16    | 14      | 3       | 95248.210   | -0.001                    |
| 21   | 7      | 14     | 20    | 7       | 13      | 95570.290   | -0.002                    |
| 21   | 8      | 14     | 20    | 8       | 13      | 95570.290   | -0.002                    |
| 26   | 1      | 25     | 25    | 1       | 24      | 95662.100   | -0.001                    |
| 26   | 2      | 25     | 25    | 2       | 24      | 95662.100   | -0.001                    |
| 22   | 6      | 16     | 21    | 6       | 15      | 96166.150   | 0.004                     |
| 22   | 7      | 16     | 21    | 7       | 15      | 96166.150   | 0.004                     |
| 27   | 0      | 27     | 26    | 0       | 26      | 96263.930   | 0.000                     |
| 27   | 1      | 27     | 26    | 1       | 26      | 96263.930   | 0.000                     |
| 17   | 14     | 3      | 16    | 14      | 2       | 96715.516   | 0.004                     |
| 23   | 5      | 18     | 22    | 5       | 17      | 96765.656   | 0.001                     |
| 23   | 6      | 18     | 22    | 6       | 17      | 96765.656   | 0.001                     |
| 50   | 17     | 33     | 50    | 17      | 34      | 97051.842   | 0.037                     |
| 49   | 16     | 33     | 49    | 16      | 34      | 97086.856   | 0.051                     |
| 48   | 15     | 33     | 48    | 15      | 34      | 97120.006   | 0.032                     |
| 18   | 11     | 7      | 17    | 11      | 6       | 97157.364   | -0.004                    |
| 42   | 10     | 33     | 42    | 8       | 34      | 97284.380   | -0.001                    |
| 42   | 9      | 33     | 42    | 9       | 34      | 97284.380   | -0.001                    |
| 41   | 9      | 33     | 41    | 7       | 34      | 97306.610   | -0.009                    |
| 41   | 8      | 33     | 41    | 8       | 34      | 97306.610   | -0.009                    |
| 40   | 8      | 33     | 40    | 6       | 34      | 97327.540   | -0.004                    |
| 40   | 7      | 33     | 40    | 7       | 34      | 97327.540   | -0.004                    |
| 14   | 12     | 2      | 13    | 10      | 3       | 97328.415   | -0.010                    |
| 39   | 7      | 33     | 39    | 5       | 34      | 97347.210   | -0.004                    |
| 39   | 6      | 33     | 39    | 6       | 34      | 97347.210   | -0.004                    |
| 38   | 6      | 33     | 38    | 4       | 34      | 97365.690   | 0.005                     |
| 38   | 5      | 33     | 38    | 5       | 34      | 97365.690   | 0.005                     |
| 24   | 4      | 20     | 23    | 4       | 19      | 97366.794   | 0.004                     |
| 24   | 5      | 20     | 23    | 5       | 19      | 97366.794   | 0.004                     |
| 19   | 11     | 9      | 18    | 11      | 8       | 97381.872   | -0.003                    |
| 37   | 5      | 33     | 37    | 3       | 34      | 97383.011   | 0.000                     |
| 37   | 4      | 33     | 37    | 4       | 34      | 97383.011   | 0.000                     |
| 19   | 10     | 9      | 18    | 10      | 8       | 97384.740   | -0.004                    |
| 36   | 4      | 33     | 36    | 2       | 34      | 97399.254   | 0.009                     |
| 36   | 3      | 33     | 36    | 3       | 34      | 97399.254   | 0.009                     |
| 35   | 3      | 33     | 35    | 1       | 34      | 97414.450   | 0.012                     |
| 35   | 2      | 33     | 35    | 2       | 34      | 97414.450   | 0.012                     |
| 34   | 1      | 33     | 34    | 1       | 34      | 97428.660   | 0.020                     |
| 34   | 2      | 33     | 34    | 0       | 34      | 97428.660   | 0.020                     |
| 20   | 9      | 11     | 19    | 9       | 10      | 97913.842   | -0.004                    |
| 20   | 10     | 11     | 19    | 10      | 10      | 97913.842   | 0.008                     |
| 25   | 3      | 22     | 24    | 3       | 21      | 97968.603   | -0.001                    |
| 25   | 4      | 22     | 24    | 4       | 21      | 97968.603   | -0.001                    |
| 17   | 12     | 5      | 16    | 12      | 4       | 98368.181   | -0.003                    |
| 21   | 8      | 13     | 20    | 8       | 12      | 98488.619   | 0.002                     |

Continuation, see next page

Continuation of Table 27: ground state of dithiine.

| $J'$ | $K'_a$ | $K'_c$ | $J''$ | $K''_a$ | $K''_c$ | $\nu_{obs}$ | $(\nu_{obs} - \nu_{cal})$ |
|------|--------|--------|-------|---------|---------|-------------|---------------------------|
|      |        |        |       |         |         | /MHz        | /MHz                      |
| 21   | 9      | 13     | 20    | 9       | 12      | 98488.619   | 0.002                     |
| 26   | 2      | 24     | 25    | 2       | 23      | 98570.616   | 0.001                     |
| 26   | 3      | 24     | 25    | 3       | 23      | 98570.616   | 0.001                     |
| 13   | 8      | 5      | 12    | 6       | 6       | 98648.750   | -0.005                    |
| 22   | 7      | 15     | 21    | 7       | 14      | 99079.105   | -0.004                    |
| 22   | 8      | 15     | 21    | 8       | 14      | 99079.105   | -0.004                    |
| 18   | 17     | 1      | 17    | 17      | 0       | 99117.615   | -0.003                    |
| 27   | 1      | 26     | 26    | 1       | 25      | 99172.558   | 0.003                     |
| 27   | 2      | 26     | 26    | 2       | 25      | 99172.558   | 0.003                     |
| 17   | 13     | 4      | 16    | 13      | 3       | 99218.588   | -0.002                    |
| 23   | 6      | 17     | 22    | 6       | 16      | 99676.122   | 0.004                     |
| 23   | 7      | 17     | 22    | 7       | 16      | 99676.122   | 0.004                     |
| 28   | 0      | 28     | 27    | 0       | 27      | 99774.262   | 0.000                     |
| 28   | 1      | 28     | 27    | 1       | 27      | 99774.262   | 0.000                     |
| 18   | 16     | 3      | 17    | 16      | 2       | 99975.782   | 0.000                     |
| 14   | 10     | 4      | 13    | 8       | 5       | 100009.863  | 0.005                     |
| 18   | 16     | 2      | 17    | 16      | 1       | 100083.681  | 0.001                     |
| 44   | 10     | 34     | 44    | 10      | 35      | 100168.579  | 0.002                     |
| 44   | 11     | 34     | 44    | 9       | 35      | 100168.579  | 0.002                     |
| 43   | 9      | 34     | 43    | 9       | 35      | 100192.123  | -0.002                    |
| 43   | 10     | 34     | 43    | 8       | 35      | 100192.123  | -0.002                    |
| 42   | 9      | 34     | 42    | 7       | 35      | 100214.349  | 0.000                     |
| 42   | 8      | 34     | 42    | 8       | 35      | 100214.349  | 0.000                     |
| 41   | 8      | 34     | 41    | 6       | 35      | 100235.303  | -0.002                    |
| 41   | 7      | 34     | 41    | 7       | 35      | 100235.303  | -0.002                    |
| 40   | 7      | 34     | 40    | 5       | 35      | 100255.043  | -0.002                    |
| 40   | 6      | 34     | 40    | 6       | 35      | 100255.043  | -0.002                    |
| 39   | 6      | 34     | 39    | 4       | 35      | 100273.618  | -0.006                    |
| 39   | 5      | 34     | 39    | 5       | 35      | 100273.618  | -0.006                    |
| 24   | 5      | 19     | 23    | 5       | 18      | 100276.054  | 0.002                     |
| 24   | 6      | 19     | 23    | 6       | 18      | 100276.054  | 0.002                     |
| 38   | 5      | 34     | 38    | 3       | 35      | 100291.098  | 0.007                     |
| 38   | 4      | 34     | 38    | 4       | 35      | 100291.098  | 0.007                     |
| 37   | 4      | 34     | 37    | 2       | 35      | 100307.500  | 0.005                     |
| 37   | 3      | 34     | 37    | 3       | 35      | 100307.500  | 0.005                     |
| 36   | 3      | 34     | 36    | 1       | 35      | 100322.905  | 0.017                     |
| 36   | 2      | 34     | 36    | 2       | 35      | 100322.905  | 0.017                     |
| 19   | 12     | 8      | 18    | 12      | 7       | 100385.063  | -0.002                    |
| 19   | 11     | 8      | 18    | 11      | 7       | 100431.723  | 0.010                     |
| 18   | 15     | 4      | 17    | 15      | 3       | 100835.468  | 0.010                     |
| 20   | 11     | 10     | 19    | 11      | 9       | 100862.918  | -0.008                    |
| 20   | 10     | 10     | 19    | 10      | 9       | 100863.271  | 0.011                     |
| 25   | 4      | 21     | 24    | 4       | 20      | 100877.316  | 0.005                     |
| 25   | 5      | 21     | 24    | 5       | 20      | 100877.316  | 0.005                     |
| 18   | 14     | 5      | 17    | 14      | 4       | 100936.732  | -0.002                    |
| 18   | 12     | 6      | 17    | 12      | 5       | 101191.832  | -0.001                    |

Continuation, see next page

Continuation of Table 27: ground state of dithiine.

| $J'$ | $K'_a$ | $K'_c$ | $J''$ | $K''_a$ | $K''_c$ | $\nu_{obs}$ | $(\nu_{obs} - \nu_{cal})$ |
|------|--------|--------|-------|---------|---------|-------------|---------------------------|
|      |        |        |       |         |         | /MHz        | /MHz                      |
| 21   | 10     | 12     | 20    | 10      | 11      | 101414.340  | 0.003                     |
| 21   | 9      | 12     | 20    | 9       | 11      | 101414.340  | 0.002                     |
| 21   | 9      | 12     | 20    | 9       | 11      | 101414.340  | 0.002                     |
| 21   | 10     | 12     | 20    | 10      | 11      | 101414.340  | 0.003                     |
| 26   | 3      | 23     | 25    | 3       | 22      | 101479.121  | 0.003                     |
| 26   | 4      | 23     | 25    | 4       | 22      | 101479.121  | 0.003                     |
| 18   | 15     | 3      | 17    | 15      | 2       | 101852.378  | -0.002                    |
| 14   | 12     | 3      | 13    | 10      | 4       | 101950.483  | -0.006                    |
| 13   | 7      | 6      | 12    | 5       | 7       | 101951.694  | 0.008                     |
| 22   | 8      | 14     | 21    | 8       | 13      | 101995.472  | 0.000                     |
| 22   | 9      | 14     | 21    | 9       | 13      | 101995.472  | 0.000                     |
| 27   | 3      | 25     | 26    | 3       | 24      | 102081.057  | 0.000                     |
| 27   | 2      | 25     | 26    | 2       | 24      | 102081.057  | 0.000                     |
| 15   | 12     | 3      | 14    | 10      | 4       | 102418.974  | -0.007                    |
| 23   | 7      | 16     | 22    | 7       | 15      | 102588.253  | 0.001                     |
| 23   | 8      | 16     | 22    | 8       | 15      | 102588.253  | 0.001                     |
| 14   | 11     | 4      | 13    | 9       | 5       | 102606.822  | 0.010                     |
| 28   | 2      | 27     | 27    | 2       | 26      | 102682.889  | -0.001                    |
| 28   | 1      | 27     | 27    | 1       | 26      | 102682.889  | -0.001                    |
| 40   | 6      | 35     | 40    | 4       | 36      | 103181.522  | 0.001                     |
| 40   | 5      | 35     | 40    | 5       | 36      | 103181.522  | 0.001                     |
| 24   | 6      | 18     | 23    | 6       | 17      | 103186.141  | 0.001                     |
| 24   | 7      | 18     | 23    | 7       | 17      | 103186.141  | 0.001                     |
| 39   | 5      | 35     | 39    | 3       | 36      | 103199.148  | 0.004                     |
| 39   | 4      | 35     | 39    | 4       | 36      | 103199.148  | 0.004                     |
| 38   | 4      | 35     | 38    | 2       | 36      | 103215.742  | 0.008                     |
| 38   | 3      | 35     | 38    | 3       | 36      | 103215.742  | 0.008                     |
| 36   | 1      | 35     | 36    | 1       | 36      | 103246.013  | 0.019                     |
| 36   | 2      | 35     | 36    | 0       | 36      | 103246.013  | 0.019                     |
| 29   | 0      | 29     | 28    | 0       | 28      | 103284.469  | -0.001                    |
| 29   | 1      | 29     | 28    | 1       | 28      | 103284.469  | -0.001                    |
| 25   | 5      | 20     | 24    | 5       | 19      | 103786.400  | 0.004                     |
| 25   | 6      | 20     | 24    | 6       | 19      | 103786.400  | 0.004                     |
| 19   | 12     | 7      | 18    | 12      | 6       | 103824.530  | -0.003                    |
| 20   | 12     | 9      | 19    | 12      | 8       | 103845.125  | -0.005                    |
| 20   | 11     | 9      | 19    | 11      | 8       | 103851.910  | -0.003                    |
| 26   | 4      | 22     | 25    | 4       | 21      | 104387.740  | -0.002                    |
| 26   | 5      | 22     | 25    | 5       | 21      | 104387.740  | -0.002                    |
| 19   | 18     | 2      | 18    | 18      | 1       | 104570.210  | 0.008                     |
| 19   | 18     | 1      | 18    | 18      | 0       | 104573.040  | -0.006                    |
| 18   | 14     | 4      | 17    | 14      | 3       | 104648.140  | -0.005                    |
| 18   | 13     | 5      | 17    | 13      | 4       | 104886.175  | -0.004                    |
| 22   | 10     | 13     | 21    | 10      | 12      | 104917.500  | -0.006                    |
| 22   | 9      | 13     | 21    | 9       | 12      | 104917.500  | -0.006                    |
| 27   | 3      | 24     | 26    | 3       | 23      | 104989.520  | -0.004                    |
| 27   | 4      | 24     | 26    | 4       | 23      | 104989.520  | -0.004                    |

Continuation, see next page

Continuation of Table 27: ground state of dithiine.

| $J'$ | $K'_a$ | $K'_c$ | $J''$ | $K''_a$ | $K''_c$ | $\nu_{obs}$ | $(\nu_{obs} - \nu_{cal})$ |
|------|--------|--------|-------|---------|---------|-------------|---------------------------|
|      |        |        |       |         |         | /MHz        | /MHz                      |
| 19   | 17     | 3      | 18    | 17      | 2       | 105430.350  | 0.003                     |
| 19   | 17     | 2      | 18    | 17      | 1       | 105492.430  | -0.007                    |
| 23   | 8      | 15     | 22    | 8       | 14      | 105503.120  | 0.001                     |
| 23   | 9      | 15     | 22    | 9       | 14      | 105503.120  | 0.001                     |
| 28   | 2      | 26     | 27    | 2       | 25      | 105591.380  | -0.002                    |
| 28   | 3      | 26     | 27    | 3       | 25      | 105591.380  | -0.002                    |
| 49   | 13     | 36     | 49    | 13      | 37      | 105905.218  | 0.005                     |
| 49   | 14     | 36     | 49    | 12      | 37      | 105905.218  | 0.005                     |
| 48   | 12     | 36     | 48    | 12      | 37      | 105932.751  | -0.001                    |
| 48   | 13     | 36     | 48    | 11      | 37      | 105932.751  | -0.001                    |
| 47   | 11     | 36     | 47    | 11      | 37      | 105958.888  | -0.010                    |
| 47   | 12     | 36     | 47    | 10      | 37      | 105958.888  | -0.010                    |
| 46   | 10     | 36     | 46    | 10      | 37      | 105983.700  | -0.004                    |
| 46   | 11     | 36     | 46    | 9       | 37      | 105983.700  | -0.004                    |
| 44   | 8      | 36     | 44    | 8       | 37      | 106029.486  | -0.013                    |
| 44   | 9      | 36     | 44    | 7       | 37      | 106029.486  | -0.013                    |
| 43   | 7      | 36     | 43    | 7       | 37      | 106050.577  | -0.009                    |
| 43   | 8      | 36     | 43    | 6       | 37      | 106050.577  | -0.009                    |
| 42   | 6      | 36     | 42    | 6       | 37      | 106070.528  | -0.002                    |
| 42   | 7      | 36     | 42    | 5       | 37      | 106070.528  | -0.002                    |
| 41   | 5      | 36     | 41    | 5       | 37      | 106089.373  | -0.004                    |
| 41   | 6      | 36     | 41    | 4       | 37      | 106089.373  | -0.004                    |
| 24   | 7      | 17     | 23    | 7       | 16      | 106097.610  | 0.002                     |
| 24   | 8      | 17     | 23    | 8       | 16      | 106097.610  | 0.002                     |
| 40   | 4      | 36     | 40    | 4       | 37      | 106107.175  | 0.002                     |
| 40   | 5      | 36     | 40    | 3       | 37      | 106107.175  | 0.002                     |
| 39   | 3      | 36     | 39    | 3       | 37      | 106123.967  | 0.006                     |
| 39   | 4      | 36     | 39    | 2       | 37      | 106123.967  | 0.006                     |
| 38   | 2      | 36     | 38    | 2       | 37      | 106139.793  | 0.009                     |
| 38   | 3      | 36     | 38    | 1       | 37      | 106139.793  | 0.009                     |
| 37   | 1      | 36     | 37    | 1       | 37      | 106154.698  | 0.014                     |
| 37   | 2      | 36     | 37    | 0       | 37      | 106154.698  | 0.014                     |
| 29   | 1      | 28     | 28    | 1       | 27      | 106193.100  | -0.002                    |
| 29   | 2      | 28     | 28    | 2       | 27      | 106193.100  | -0.002                    |
| 19   | 16     | 4      | 18    | 16      | 3       | 106369.540  | 0.006                     |
| 25   | 6      | 19     | 24    | 6       | 18      | 106696.170  | -0.002                    |
| 25   | 7      | 19     | 24    | 7       | 18      | 106696.170  | -0.002                    |
| 19   | 15     | 5      | 18    | 15      | 4       | 106775.020  | -0.008                    |
| 30   | 0      | 30     | 29    | 0       | 29      | 106794.550  | 0.001                     |
| 30   | 1      | 30     | 29    | 1       | 29      | 106794.550  | 0.001                     |
| 19   | 16     | 3      | 18    | 16      | 2       | 107042.640  | 0.000                     |
| 26   | 5      | 21     | 25    | 5       | 20      | 107296.680  | 0.005                     |
| 26   | 6      | 21     | 25    | 6       | 20      | 107296.680  | 0.005                     |
| 21   | 12     | 10     | 20    | 12      | 9       | 107315.350  | -0.004                    |
| 21   | 11     | 10     | 20    | 11      | 9       | 107316.210  | 0.001                     |
| 22   | 11     | 12     | 21    | 11      | 11      | 107849.150  | 0.003                     |

Continuation, see next page

Continuation of Table 27: ground state of dithiine.

| $J'$ | $K'_a$ | $K'_c$ | $J''$ | $K''_a$ | $K''_c$ | $\nu_{obs}$ | $(\nu_{obs} - \nu_{cal})$ |
|------|--------|--------|-------|---------|---------|-------------|---------------------------|
|      |        |        |       |         |         | /MHz        | /MHz                      |
| 22   | 10     | 12     | 21    | 10      | 11      | 107849.150  | 0.000                     |
| 27   | 4      | 23     | 26    | 4       | 22      | 107898.075  | 0.001                     |
| 27   | 5      | 23     | 26    | 5       | 22      | 107898.075  | 0.001                     |
| 19   | 13     | 6      | 18    | 13      | 5       | 108144.225  | -0.001                    |
| 23   | 10     | 14     | 22    | 10      | 13      | 108422.440  | 0.002                     |
| 23   | 9      | 14     | 22    | 9       | 13      | 108422.440  | 0.002                     |
| 28   | 3      | 25     | 27    | 3       | 24      | 108499.815  | -0.001                    |
| 28   | 4      | 25     | 27    | 4       | 24      | 108499.815  | -0.001                    |
| 50   | 13     | 37     | 50    | 13      | 38      | 108812.734  | 0.005                     |
| 50   | 14     | 37     | 50    | 12      | 38      | 108812.734  | 0.005                     |
| 49   | 12     | 37     | 49    | 12      | 38      | 108840.167  | 0.003                     |
| 49   | 13     | 37     | 49    | 11      | 38      | 108840.167  | 0.003                     |
| 48   | 11     | 37     | 48    | 11      | 38      | 108866.248  | -0.005                    |
| 48   | 12     | 37     | 48    | 10      | 38      | 108866.248  | -0.005                    |
| 47   | 10     | 37     | 47    | 10      | 38      | 108891.040  | -0.005                    |
| 47   | 11     | 37     | 47    | 9       | 38      | 108891.040  | -0.005                    |
| 46   | 9      | 37     | 46    | 9       | 38      | 108914.579  | -0.010                    |
| 46   | 10     | 37     | 46    | 8       | 38      | 108914.579  | -0.010                    |
| 45   | 8      | 37     | 45    | 8       | 38      | 108936.923  | -0.007                    |
| 45   | 9      | 37     | 45    | 7       | 38      | 108936.923  | -0.007                    |
| 44   | 7      | 37     | 44    | 7       | 38      | 108958.119  | 0.003                     |
| 44   | 8      | 37     | 44    | 6       | 38      | 108958.119  | 0.003                     |
| 43   | 6      | 37     | 43    | 6       | 38      | 108978.188  | -0.002                    |
| 43   | 7      | 37     | 43    | 5       | 38      | 108978.188  | -0.002                    |
| 42   | 5      | 37     | 42    | 5       | 38      | 108997.189  | -0.008                    |
| 42   | 6      | 37     | 42    | 4       | 38      | 108997.189  | -0.008                    |
| 24   | 8      | 16     | 23    | 8       | 15      | 109011.310  | 0.003                     |
| 24   | 8      | 16     | 23    | 8       | 15      | 109011.310  | 0.003                     |
| 29   | 2      | 27     | 28    | 2       | 26      | 109101.590  | 0.006                     |
| 29   | 3      | 27     | 28    | 3       | 26      | 109101.590  | 0.006                     |
| 30   | 1      | 29     | 29    | 1       | 28      | 109703.185  | -0.002                    |
| 30   | 2      | 29     | 29    | 2       | 28      | 109703.185  | -0.002                    |
| 19   | 15     | 4      | 18    | 15      | 3       | 109865.900  | 0.003                     |
| 20   | 19     | 2      | 19    | 19      | 1       | 110028.025  | 0.014                     |
| 20   | 19     | 1      | 19    | 19      | 0       | 110029.480  | -0.015                    |
| 26   | 6      | 20     | 25    | 6       | 19      | 110206.183  | -0.002                    |
| 26   | 7      | 20     | 25    | 7       | 19      | 110206.183  | -0.002                    |
| 21   | 13     | 9      | 20    | 13      | 8       | 110318.440  | 0.000                     |
| 21   | 12     | 9      | 20    | 12      | 8       | 110333.600  | 0.004                     |
| 15   | 14     | 1      | 14    | 12      | 2       | 110526.900  | 0.008                     |
| 20   | 13     | 7      | 19    | 13      | 6       | 110591.770  | 0.003                     |
| 27   | 5      | 22     | 26    | 5       | 21      | 110806.880  | 0.005                     |
| 27   | 6      | 22     | 26    | 6       | 21      | 110806.880  | 0.005                     |
| 20   | 18     | 3      | 19    | 18      | 2       | 110880.140  | 0.000                     |
| 20   | 18     | 2      | 19    | 18      | 1       | 110915.265  | -0.003                    |
| 19   | 14     | 5      | 18    | 14      | 4       | 111148.615  | -0.014                    |

Continuation, see next page

Continuation of Table 27: ground state of dithiine.

| $J'$ | $K'_a$ | $K'_c$ | $J''$ | $K''_a$ | $K''_c$ | $\nu_{obs}$ | $(\nu_{obs} - \nu_{cal})$ |
|------|--------|--------|-------|---------|---------|-------------|---------------------------|
|      |        |        |       |         |         | /MHz        | /MHz                      |
| 23   | 11     | 13     | 22    | 11      | 12      | 111349.080  | 0.008                     |
| 23   | 10     | 13     | 22    | 10      | 12      | 111349.080  | 0.008                     |
| 15   | 14     | 2      | 14    | 12      | 3       | 111370.330  | -0.003                    |
| 28   | 4      | 24     | 27    | 4       | 23      | 111408.305  | 0.004                     |
| 28   | 5      | 24     | 27    | 5       | 23      | 111408.305  | 0.004                     |
| 15   | 11     | 5      | 14    | 9       | 6       | 111430.620  | 0.008                     |
| 46   | 8      | 38     | 46    | 8       | 39      | 111844.260  | -0.013                    |
| 46   | 9      | 38     | 46    | 7       | 39      | 111844.260  | -0.013                    |
| 20   | 17     | 4      | 19    | 17      | 3       | 111864.430  | -0.001                    |
| 45   | 7      | 38     | 45    | 7       | 39      | 111865.558  | -0.020                    |
| 45   | 8      | 38     | 45    | 6       | 39      | 111865.558  | -0.020                    |
| 44   | 6      | 38     | 44    | 6       | 39      | 111885.800  | 0.000                     |
| 44   | 7      | 38     | 44    | 5       | 39      | 111885.800  | 0.000                     |
| 43   | 5      | 38     | 43    | 5       | 39      | 111904.980  | -0.002                    |
| 43   | 6      | 38     | 43    | 4       | 39      | 111904.980  | -0.002                    |
| 20   | 15     | 6      | 19    | 15      | 5       | 111908.900  | -0.007                    |
| 42   | 4      | 38     | 42    | 4       | 39      | 111923.180  | 0.016                     |
| 42   | 5      | 38     | 42    | 3       | 38      | 111923.180  | 0.016                     |
| 24   | 9      | 15     | 23    | 9       | 14      | 111928.570  | 0.002                     |
| 24   | 10     | 15     | 23    | 10      | 14      | 111928.570  | 0.002                     |
| 41   | 3      | 38     | 41    | 3       | 39      | 111940.400  | 0.016                     |
| 41   | 4      | 38     | 41    | 2       | 39      | 111940.400  | 0.016                     |
| 40   | 2      | 38     | 40    | 2       | 39      | 111956.710  | 0.028                     |
| 40   | 3      | 38     | 40    | 1       | 39      | 111956.710  | 0.028                     |
| 29   | 3      | 26     | 28    | 3       | 25      | 112009.990  | 0.000                     |
| 29   | 4      | 26     | 28    | 4       | 25      | 112009.990  | 0.000                     |
| 20   | 17     | 3      | 19    | 17      | 2       | 112293.550  | -0.006                    |
| 20   | 16     | 5      | 19    | 16      | 4       | 112517.490  | -0.006                    |
| 30   | 2      | 28     | 29    | 2       | 27      | 112611.660  | -0.001                    |
| 30   | 3      | 28     | 29    | 3       | 27      | 112611.660  | -0.001                    |
| 26   | 7      | 19     | 25    | 7       | 18      | 113116.660  | -0.001                    |
| 26   | 8      | 19     | 25    | 8       | 18      | 113116.660  | -0.001                    |
| 31   | 1      | 30     | 30    | 1       | 29      | 113213.140  | 0.001                     |
| 31   | 2      | 30     | 30    | 2       | 29      | 113213.140  | 0.001                     |
| 21   | 14     | 8      | 20    | 14      | 7       | 113352.110  | 0.000                     |
| 21   | 13     | 8      | 20    | 13      | 7       | 113536.240  | -0.004                    |
| 27   | 6      | 21     | 26    | 6       | 20      | 113716.160  | 0.002                     |
| 27   | 7      | 21     | 26    | 7       | 20      | 113716.160  | 0.002                     |
| 22   | 13     | 10     | 21    | 13      | 9       | 113775.930  | -0.011                    |
| 22   | 12     | 10     | 21    | 12      | 9       | 113778.010  | 0.004                     |
| 32   | 0      | 32     | 31    | 0       | 31      | 113814.300  | -0.005                    |
| 32   | 1      | 32     | 31    | 1       | 31      | 113814.300  | -0.005                    |
| 23   | 12     | 12     | 22    | 12      | 11      | 114288.000  | 0.008                     |
| 28   | 5      | 23     | 27    | 5       | 22      | 114316.990  | 0.005                     |
| 28   | 6      | 23     | 27    | 6       | 22      | 114316.990  | 0.005                     |
| 48   | 9      | 39     | 48    | 9       | 40      | 114728.980  | -0.016                    |

Continuation, see next page

Continuation of Table 27: ground state of dithiine.

| $J'$ | $K'_a$ | $K'_c$ | $J''$ | $K''_a$ | $K''_c$ | $\nu_{obs}$ | $(\nu_{obs} - \nu_{cal})$ |
|------|--------|--------|-------|---------|---------|-------------|---------------------------|
|      |        |        |       |         |         | /MHz        | /MHz                      |
| 48   | 10     | 39     | 48    | 8       | 40      | 114728.980  | -0.016                    |
| 47   | 8      | 39     | 47    | 8       | 40      | 114751.510  | -0.022                    |
| 47   | 9      | 39     | 47    | 7       | 40      | 114751.510  | -0.022                    |
| 46   | 7      | 39     | 46    | 7       | 40      | 114772.960  | -0.014                    |
| 46   | 8      | 39     | 46    | 6       | 40      | 114772.960  | -0.014                    |
| 45   | 6      | 39     | 45    | 6       | 40      | 114793.350  | -0.012                    |
| 45   | 7      | 39     | 45    | 5       | 40      | 114793.350  | -0.012                    |
| 44   | 5      | 39     | 44    | 5       | 40      | 114812.730  | -0.004                    |
| 44   | 6      | 39     | 44    | 4       | 40      | 114812.730  | -0.004                    |
| 43   | 4      | 39     | 43    | 4       | 40      | 114831.125  | -0.004                    |
| 43   | 5      | 39     | 43    | 3       | 40      | 114831.125  | -0.004                    |
| 29   | 4      | 25     | 28    | 4       | 24      | 114918.420  | 0.003                     |
| 29   | 5      | 25     | 28    | 5       | 24      | 114918.420  | 0.003                     |
| 25   | 9      | 16     | 24    | 9       | 15      | 115435.530  | 0.002                     |
| 25   | 10     | 16     | 24    | 10      | 15      | 115435.530  | 0.002                     |
| 30   | 3      | 27     | 29    | 3       | 26      | 115520.040  | 0.000                     |
| 30   | 4      | 27     | 29    | 4       | 26      | 115520.040  | 0.000                     |
| 26   | 8      | 18     | 25    | 8       | 17      | 116028.675  | 0.004                     |
| 26   | 9      | 18     | 25    | 9       | 17      | 116028.675  | 0.004                     |
| 31   | 2      | 29     | 30    | 2       | 28      | 116121.605  | -0.002                    |
| 31   | 3      | 29     | 30    | 3       | 28      | 116121.605  | -0.002                    |
| 27   | 7      | 20     | 26    | 7       | 19      | 116626.250  | -0.005                    |
| 27   | 8      | 20     | 26    | 8       | 19      | 116626.250  | -0.005                    |
| 22   | 14     | 9      | 21    | 14      | 8       | 116802.325  | -0.006                    |
| 22   | 13     | 9      | 21    | 13      | 8       | 116834.485  | -0.004                    |
| 28   | 6      | 22     | 27    | 6       | 21      | 117226.075  | 0.003                     |
| 28   | 7      | 22     | 27    | 7       | 21      | 117226.075  | 0.003                     |
| 33   | 0      | 33     | 32    | 0       | 32      | 117323.970  | -0.003                    |
| 33   | 0      | 33     | 32    | 0       | 32      | 117323.970  | -0.003                    |
| 21   | 18     | 4      | 20    | 18      | 3       | 117332.265  | -0.002                    |

Table 28: Rovibrational transition wavenumbers  $\tilde{\nu}_{obs}$  for the fundamental  $\nu_{22} \leftarrow gs$  of dithiine.  $J''$ ,  $K''_a$  and  $K''_c$  are lower state quantum numbers,  $J'$ ,  $K'_a$  and  $K'_c$  are upper state quantum numbers,  $\tilde{\nu}_{obs.}$  = observed wavenumber,  $\tilde{\nu}_{cal.}$  = wavenumber calculated with the parameters in Table 10. All wavenumbers are given in  $\text{cm}^{-1}$ .

Table 28: Rovibrational transitions of  $\nu_{22} \leftarrow gs$  of dithiine.

| $J'$ | $K'_a$ | $K'_c$ | $J''$ | $K''_a$ | $K''_c$ | $\tilde{\nu}_{obs}$ | $(\tilde{\nu}_{obs} - \tilde{\nu}_{cal})$ |
|------|--------|--------|-------|---------|---------|---------------------|-------------------------------------------|
|      |        |        |       |         |         | /cm <sup>-1</sup>   | /cm <sup>-1</sup>                         |
| 76   | 35     | 41     | 77    | 36      | 41      | 606.164080          | 0.000191                                  |

Continuation, see next page

Continuation of Table 28:  $\nu_{22} \leftarrow gs$  of dithiine.

| $J'$ | $K'_a$ | $K'_c$ | $J''$ | $K''_a$ | $K''_c$ | $\tilde{\nu}_{obs}$<br>/cm <sup>-1</sup> | $(\tilde{\nu}_{obs} - \tilde{\nu}_{cal})$<br>/cm <sup>-1</sup> |
|------|--------|--------|-------|---------|---------|------------------------------------------|----------------------------------------------------------------|
| 76   | 36     | 41     | 77    | 37      | 41      | 606.164080                               | 0.000191                                                       |
| 76   | 40     | 36     | 77    | 41      | 36      | 606.164080                               | 0.000159                                                       |
| 76   | 41     | 36     | 77    | 42      | 36      | 606.164080                               | 0.000159                                                       |
| 72   | 69     | 3      | 73    | 70      | 3       | 606.369110                               | -0.000313                                                      |
| 72   | 69     | 4      | 73    | 70      | 4       | 606.369110                               | -0.000313                                                      |
| 72   | 69     | 3      | 73    | 70      | 4       | 606.369110                               | -0.000313                                                      |
| 72   | 69     | 4      | 73    | 70      | 3       | 606.369110                               | -0.000313                                                      |
| 75   | 35     | 41     | 76    | 36      | 41      | 606.385340                               | -0.000128                                                      |
| 75   | 34     | 41     | 76    | 35      | 41      | 606.385340                               | -0.000128                                                      |
| 71   | 68     | 3      | 72    | 69      | 3       | 606.605960                               | -0.000153                                                      |
| 71   | 68     | 4      | 72    | 69      | 4       | 606.605960                               | -0.000153                                                      |
| 74   | 34     | 40     | 75    | 35      | 40      | 606.605960                               | -0.000147                                                      |
| 74   | 35     | 40     | 75    | 36      | 40      | 606.605960                               | -0.000147                                                      |
| 71   | 68     | 3      | 72    | 69      | 4       | 606.605960                               | -0.000153                                                      |
| 71   | 68     | 4      | 72    | 69      | 3       | 606.605960                               | -0.000153                                                      |
| 70   | 69     | 1      | 71    | 70      | 1       | 606.731570                               | 0.000061                                                       |
| 70   | 69     | 2      | 71    | 70      | 2       | 606.731570                               | 0.000061                                                       |
| 70   | 69     | 1      | 71    | 70      | 2       | 606.731570                               | 0.000061                                                       |
| 70   | 69     | 2      | 71    | 70      | 1       | 606.731570                               | 0.000061                                                       |
| 73   | 37     | 36     | 74    | 38      | 36      | 606.826790                               | 0.000351                                                       |
| 73   | 38     | 36     | 74    | 39      | 36      | 606.826790                               | 0.000351                                                       |
| 73   | 34     | 39     | 74    | 35      | 39      | 606.826790                               | 0.000005                                                       |
| 73   | 35     | 39     | 74    | 36      | 39      | 606.826790                               | 0.000005                                                       |
| 70   | 67     | 3      | 71    | 68      | 3       | 606.842640                               | -0.000086                                                      |
| 70   | 67     | 4      | 71    | 68      | 4       | 606.842640                               | -0.000086                                                      |
| 70   | 67     | 3      | 71    | 68      | 4       | 606.842640                               | -0.000086                                                      |
| 70   | 67     | 4      | 71    | 68      | 3       | 606.842640                               | -0.000086                                                      |
| 69   | 68     | 1      | 70    | 69      | 1       | 606.968910                               | 0.000117                                                       |
| 69   | 68     | 2      | 70    | 69      | 2       | 606.968910                               | 0.000117                                                       |
| 69   | 68     | 1      | 70    | 69      | 2       | 606.968910                               | 0.000117                                                       |
| 69   | 68     | 2      | 70    | 69      | 1       | 606.968910                               | 0.000117                                                       |
| 69   | 67     | 3      | 70    | 68      | 3       | 607.023830                               | -0.000159                                                      |
| 69   | 67     | 3      | 70    | 68      | 2       | 607.023830                               | -0.000159                                                      |
| 69   | 67     | 2      | 70    | 68      | 3       | 607.023830                               | -0.000159                                                      |
| 72   | 37     | 35     | 73    | 38      | 35      | 607.047840                               | 0.000089                                                       |
| 72   | 38     | 35     | 73    | 39      | 35      | 607.047840                               | 0.000089                                                       |
| 69   | 66     | 3      | 70    | 67      | 3       | 607.078790                               | -0.000453                                                      |
| 69   | 66     | 4      | 70    | 67      | 4       | 607.078790                               | -0.000453                                                      |
| 69   | 66     | 3      | 70    | 67      | 4       | 607.078790                               | -0.000453                                                      |
| 69   | 66     | 4      | 70    | 67      | 3       | 607.078790                               | -0.000453                                                      |
| 68   | 67     | 1      | 69    | 68      | 1       | 607.206350                               | 0.000357                                                       |
| 68   | 67     | 2      | 69    | 68      | 2       | 607.206350                               | 0.000357                                                       |
| 68   | 67     | 1      | 69    | 68      | 2       | 607.206350                               | 0.000357                                                       |
| 68   | 67     | 2      | 69    | 68      | 1       | 607.206350                               | 0.000357                                                       |
| 69   | 63     | 6      | 70    | 64      | 6       | 607.244930                               | -0.000601                                                      |
| 69   | 63     | 7      | 70    | 64      | 7       | 607.244930                               | -0.000601                                                      |

Continuation, see next page

Continuation of Table 28:  $\nu_{22} \leftarrow gs$  of dithiine.

| $J'$ | $K'_a$ | $K'_c$ | $J''$ | $K''_a$ | $K''_c$ | $\tilde{\nu}_{obs}$<br>/cm <sup>-1</sup> | $(\tilde{\nu}_{obs} - \tilde{\nu}_{cal})$<br>/cm <sup>-1</sup> |
|------|--------|--------|-------|---------|---------|------------------------------------------|----------------------------------------------------------------|
| 69   | 63     | 6      | 70    | 64      | 7       | 607.244930                               | -0.000601                                                      |
| 69   | 63     | 7      | 70    | 64      | 6       | 607.244930                               | -0.000601                                                      |
| 68   | 66     | 3      | 69    | 67      | 3       | 607.260940                               | 0.000137                                                       |
| 68   | 66     | 3      | 69    | 67      | 2       | 607.260940                               | 0.000137                                                       |
| 68   | 66     | 2      | 69    | 67      | 3       | 607.260940                               | 0.000137                                                       |
| 71   | 34     | 37     | 72    | 35      | 37      | 607.268560                               | 0.000267                                                       |
| 71   | 35     | 37     | 72    | 36      | 37      | 607.268560                               | 0.000267                                                       |
| 71   | 37     | 35     | 72    | 38      | 35      | 607.268560                               | 0.000094                                                       |
| 71   | 36     | 35     | 72    | 37      | 35      | 607.268560                               | 0.000094                                                       |
| 71   | 33     | 38     | 72    | 34      | 38      | 607.268560                               | -0.000167                                                      |
| 71   | 34     | 38     | 72    | 35      | 38      | 607.268560                               | -0.000167                                                      |
| 68   | 65     | 3      | 69    | 66      | 3       | 607.315720                               | 0.000042                                                       |
| 68   | 65     | 4      | 69    | 66      | 4       | 607.315720                               | 0.000042                                                       |
| 68   | 65     | 3      | 69    | 66      | 4       | 607.315720                               | 0.000042                                                       |
| 68   | 65     | 4      | 69    | 66      | 3       | 607.315720                               | 0.000042                                                       |
| 67   | 66     | 1      | 68    | 67      | 1       | 607.442830                               | -0.000280                                                      |
| 67   | 66     | 2      | 68    | 67      | 2       | 607.442830                               | -0.000280                                                      |
| 67   | 66     | 1      | 68    | 67      | 2       | 607.442830                               | -0.000280                                                      |
| 67   | 66     | 2      | 68    | 67      | 1       | 607.442830                               | -0.000280                                                      |
| 68   | 62     | 6      | 69    | 63      | 6       | 607.481160                               | 0.000294                                                       |
| 68   | 62     | 7      | 69    | 63      | 7       | 607.481160                               | 0.000294                                                       |
| 68   | 62     | 6      | 69    | 63      | 7       | 607.481160                               | 0.000294                                                       |
| 68   | 62     | 7      | 69    | 63      | 6       | 607.481160                               | 0.000294                                                       |
| 70   | 35     | 36     | 71    | 36      | 36      | 607.489180                               | 0.000013                                                       |
| 70   | 34     | 36     | 71    | 35      | 36      | 607.489180                               | 0.000013                                                       |
| 70   | 36     | 35     | 71    | 37      | 35      | 607.489180                               | -0.000081                                                      |
| 70   | 35     | 35     | 71    | 36      | 35      | 607.489180                               | -0.000081                                                      |
| 70   | 34     | 37     | 71    | 35      | 37      | 607.489180                               | -0.000249                                                      |
| 70   | 33     | 37     | 71    | 34      | 37      | 607.489180                               | -0.000249                                                      |
| 67   | 65     | 3      | 68    | 66      | 3       | 607.497270                               | -0.000260                                                      |
| 67   | 65     | 3      | 68    | 66      | 2       | 607.497270                               | -0.000260                                                      |
| 67   | 65     | 2      | 68    | 66      | 3       | 607.497270                               | -0.000260                                                      |
| 67   | 64     | 3      | 68    | 65      | 3       | 607.551790                               | -0.000228                                                      |
| 67   | 64     | 4      | 68    | 65      | 4       | 607.551790                               | -0.000228                                                      |
| 67   | 64     | 3      | 68    | 65      | 4       | 607.551790                               | -0.000228                                                      |
| 67   | 64     | 4      | 68    | 65      | 3       | 607.551790                               | -0.000228                                                      |
| 67   | 62     | 5      | 68    | 63      | 5       | 607.661040                               | -0.000227                                                      |
| 67   | 62     | 6      | 68    | 63      | 6       | 607.661040                               | -0.000227                                                      |
| 67   | 62     | 5      | 68    | 63      | 6       | 607.661040                               | -0.000227                                                      |
| 67   | 62     | 6      | 68    | 63      | 5       | 607.661040                               | -0.000227                                                      |
| 66   | 65     | 1      | 67    | 66      | 1       | 607.680520                               | 0.000377                                                       |
| 66   | 65     | 2      | 67    | 66      | 2       | 607.680520                               | 0.000377                                                       |
| 66   | 65     | 1      | 67    | 66      | 2       | 607.680520                               | 0.000377                                                       |
| 66   | 65     | 2      | 67    | 66      | 1       | 607.680520                               | 0.000377                                                       |
| 69   | 34     | 35     | 70    | 35      | 35      | 607.709970                               | -0.000153                                                      |
| 69   | 35     | 35     | 70    | 36      | 35      | 607.709970                               | -0.000153                                                      |

Continuation, see next page

Continuation of Table 28:  $\nu_{22} \leftarrow gs$  of dithiine.

| $J'$ | $K'_a$ | $K'_c$ | $J''$ | $K''_a$ | $K''_c$ | $\tilde{\nu}_{obs}$<br>/cm <sup>-1</sup> | $(\tilde{\nu}_{obs} - \tilde{\nu}_{cal})$<br>/cm <sup>-1</sup> |
|------|--------|--------|-------|---------|---------|------------------------------------------|----------------------------------------------------------------|
| 69   | 34     | 36     | 70    | 35      | 36      | 607.709970                               | -0.000234                                                      |
| 69   | 33     | 36     | 70    | 34      | 36      | 607.709970                               | -0.000234                                                      |
| 67   | 61     | 6      | 68    | 62      | 6       | 607.716000                               | -0.000106                                                      |
| 67   | 61     | 7      | 68    | 62      | 7       | 607.716000                               | -0.000106                                                      |
| 67   | 61     | 6      | 68    | 62      | 7       | 607.716000                               | -0.000106                                                      |
| 67   | 61     | 7      | 68    | 62      | 6       | 607.716000                               | -0.000106                                                      |
| 66   | 64     | 3      | 67    | 65      | 3       | 607.734950                               | 0.000776                                                       |
| 66   | 64     | 3      | 67    | 65      | 2       | 607.734950                               | 0.000776                                                       |
| 66   | 64     | 2      | 67    | 65      | 3       | 607.734950                               | 0.000776                                                       |
| 66   | 63     | 3      | 67    | 64      | 3       | 607.788520                               | 0.000247                                                       |
| 66   | 63     | 4      | 67    | 64      | 4       | 607.788520                               | 0.000247                                                       |
| 66   | 63     | 3      | 67    | 64      | 4       | 607.788520                               | 0.000247                                                       |
| 66   | 63     | 4      | 67    | 64      | 3       | 607.788520                               | 0.000247                                                       |
| 66   | 61     | 5      | 67    | 62      | 5       | 607.896640                               | -0.000131                                                      |
| 66   | 61     | 6      | 67    | 62      | 6       | 607.896640                               | -0.000131                                                      |
| 66   | 61     | 5      | 67    | 62      | 6       | 607.896640                               | -0.000131                                                      |
| 66   | 61     | 6      | 67    | 62      | 5       | 607.896640                               | -0.000131                                                      |
| 65   | 64     | 1      | 66    | 65      | 1       | 607.916990                               | -0.000085                                                      |
| 65   | 64     | 2      | 66    | 65      | 2       | 607.916990                               | -0.000085                                                      |
| 65   | 64     | 1      | 66    | 65      | 2       | 607.916990                               | -0.000085                                                      |
| 65   | 64     | 2      | 66    | 65      | 1       | 607.916990                               | -0.000085                                                      |
| 68   | 33     | 35     | 69    | 34      | 35      | 607.931040                               | -0.000033                                                      |
| 68   | 34     | 35     | 69    | 35      | 35      | 607.931040                               | -0.000033                                                      |
| 68   | 34     | 34     | 69    | 35      | 34      | 607.931040                               | -0.000141                                                      |
| 68   | 35     | 34     | 69    | 36      | 34      | 607.931040                               | -0.000141                                                      |
| 66   | 60     | 6      | 67    | 61      | 6       | 607.951410                               | 0.000155                                                       |
| 66   | 60     | 7      | 67    | 61      | 7       | 607.951410                               | 0.000155                                                       |
| 66   | 60     | 6      | 67    | 61      | 7       | 607.951410                               | 0.000155                                                       |
| 66   | 60     | 7      | 67    | 61      | 6       | 607.951410                               | 0.000155                                                       |
| 65   | 62     | 3      | 66    | 63      | 3       | 608.024220                               | -0.000220                                                      |
| 65   | 62     | 4      | 66    | 63      | 4       | 608.024220                               | -0.000220                                                      |
| 65   | 62     | 3      | 66    | 63      | 4       | 608.024220                               | -0.000220                                                      |
| 65   | 62     | 4      | 66    | 63      | 3       | 608.024220                               | -0.000220                                                      |
| 65   | 60     | 5      | 66    | 61      | 5       | 608.131700                               | -0.000497                                                      |
| 65   | 60     | 6      | 66    | 61      | 6       | 608.131700                               | -0.000497                                                      |
| 65   | 60     | 5      | 66    | 61      | 6       | 608.131700                               | -0.000497                                                      |
| 65   | 60     | 6      | 66    | 61      | 5       | 608.131700                               | -0.000497                                                      |
| 67   | 33     | 34     | 68    | 34      | 34      | 608.152280                               | 0.000225                                                       |
| 67   | 34     | 34     | 68    | 35      | 34      | 608.152280                               | 0.000225                                                       |
| 67   | 32     | 35     | 68    | 33      | 35      | 608.152280                               | 0.000151                                                       |
| 67   | 33     | 35     | 68    | 34      | 35      | 608.152280                               | 0.000151                                                       |
| 67   | 34     | 33     | 68    | 35      | 33      | 608.152280                               | -0.000082                                                      |
| 67   | 35     | 33     | 68    | 36      | 33      | 608.152280                               | -0.000082                                                      |
| 64   | 63     | 1      | 65    | 64      | 1       | 608.154020                               | 0.000096                                                       |
| 64   | 63     | 2      | 65    | 64      | 2       | 608.154020                               | 0.000096                                                       |
| 64   | 63     | 1      | 65    | 64      | 2       | 608.154020                               | 0.000096                                                       |

Continuation, see next page

Continuation of Table 28:  $\nu_{22} \leftarrow gs$  of dithiine.

| $J'$ | $K'_a$ | $K'_c$ | $J''$ | $K''_a$ | $K''_c$ | $\tilde{\nu}_{obs}$<br>/cm <sup>-1</sup> | $(\tilde{\nu}_{obs} - \tilde{\nu}_{cal})$<br>/cm <sup>-1</sup> |
|------|--------|--------|-------|---------|---------|------------------------------------------|----------------------------------------------------------------|
| 64   | 63     | 2      | 65    | 64      | 1       | 608.154020                               | 0.000096                                                       |
| 65   | 59     | 6      | 66    | 60      | 6       | 608.186230                               | -0.000086                                                      |
| 65   | 59     | 7      | 66    | 60      | 7       | 608.186230                               | -0.000086                                                      |
| 65   | 59     | 6      | 66    | 60      | 7       | 608.186230                               | -0.000086                                                      |
| 65   | 59     | 7      | 66    | 60      | 6       | 608.186230                               | -0.000086                                                      |
| 64   | 62     | 3      | 65    | 63      | 3       | 608.207350                               | 0.000157                                                       |
| 64   | 62     | 3      | 65    | 63      | 2       | 608.207350                               | 0.000157                                                       |
| 64   | 62     | 2      | 65    | 63      | 3       | 608.207350                               | 0.000157                                                       |
| 64   | 61     | 3      | 65    | 62      | 3       | 608.259650                               | -0.000874                                                      |
| 64   | 61     | 4      | 65    | 62      | 4       | 608.259650                               | -0.000874                                                      |
| 64   | 61     | 3      | 65    | 62      | 4       | 608.259650                               | -0.000874                                                      |
| 64   | 61     | 4      | 65    | 62      | 3       | 608.259650                               | -0.000874                                                      |
| 64   | 59     | 5      | 65    | 60      | 5       | 608.367020                               | -0.000498                                                      |
| 64   | 59     | 6      | 65    | 60      | 6       | 608.367020                               | -0.000498                                                      |
| 64   | 59     | 5      | 65    | 60      | 6       | 608.367020                               | -0.000498                                                      |
| 64   | 59     | 6      | 65    | 60      | 5       | 608.367020                               | -0.000498                                                      |
| 66   | 33     | 34     | 67    | 34      | 34      | 608.372970                               | -0.000066                                                      |
| 66   | 32     | 34     | 67    | 33      | 34      | 608.372970                               | -0.000066                                                      |
| 66   | 34     | 33     | 67    | 35      | 33      | 608.372970                               | -0.000180                                                      |
| 66   | 33     | 33     | 67    | 34      | 33      | 608.372970                               | -0.000180                                                      |
| 63   | 62     | 1      | 64    | 63      | 1       | 608.390990                               | 0.000305                                                       |
| 63   | 62     | 2      | 64    | 63      | 2       | 608.390990                               | 0.000305                                                       |
| 63   | 62     | 1      | 64    | 63      | 2       | 608.390990                               | 0.000305                                                       |
| 63   | 62     | 2      | 64    | 63      | 1       | 608.390990                               | 0.000305                                                       |
| 64   | 58     | 6      | 65    | 59      | 6       | 608.420940                               | -0.000357                                                      |
| 64   | 58     | 7      | 65    | 59      | 7       | 608.420940                               | -0.000357                                                      |
| 64   | 58     | 6      | 65    | 59      | 7       | 608.420940                               | -0.000357                                                      |
| 64   | 58     | 7      | 65    | 59      | 6       | 608.420940                               | -0.000357                                                      |
| 63   | 61     | 3      | 64    | 62      | 3       | 608.443540                               | -0.000023                                                      |
| 63   | 61     | 3      | 64    | 62      | 2       | 608.443540                               | -0.000023                                                      |
| 63   | 61     | 2      | 64    | 62      | 3       | 608.443540                               | -0.000023                                                      |
| 64   | 57     | 7      | 65    | 58      | 7       | 608.475070                               | -0.000295                                                      |
| 64   | 57     | 8      | 65    | 58      | 8       | 608.475070                               | -0.000295                                                      |
| 64   | 57     | 7      | 65    | 58      | 8       | 608.475070                               | -0.000295                                                      |
| 64   | 57     | 8      | 65    | 58      | 7       | 608.475070                               | -0.000295                                                      |
| 63   | 60     | 3      | 64    | 61      | 3       | 608.496620                               | 0.000106                                                       |
| 63   | 60     | 4      | 64    | 61      | 4       | 608.496620                               | 0.000106                                                       |
| 63   | 60     | 3      | 64    | 61      | 4       | 608.496620                               | 0.000106                                                       |
| 63   | 60     | 4      | 64    | 61      | 3       | 608.496620                               | 0.000106                                                       |
| 65   | 32     | 33     | 66    | 33      | 33      | 608.594280                               | 0.000209                                                       |
| 65   | 33     | 33     | 66    | 34      | 33      | 608.594280                               | 0.000209                                                       |
| 65   | 31     | 34     | 66    | 32      | 34      | 608.594280                               | 0.000134                                                       |
| 65   | 32     | 34     | 66    | 33      | 34      | 608.594280                               | 0.000134                                                       |
| 65   | 33     | 32     | 66    | 34      | 32      | 608.594280                               | -0.000105                                                      |
| 65   | 34     | 32     | 66    | 35      | 32      | 608.594280                               | -0.000105                                                      |
| 63   | 58     | 5      | 64    | 59      | 5       | 608.603010                               | 0.000247                                                       |

Continuation, see next page

Continuation of Table 28:  $\nu_{22} \leftarrow gs$  of dithiine.

| $J'$ | $K'_a$ | $K'_c$ | $J''$ | $K''_a$ | $K''_c$ | $\tilde{\nu}_{obs}$<br>/cm <sup>-1</sup> | $(\tilde{\nu}_{obs} - \tilde{\nu}_{cal})$<br>/cm <sup>-1</sup> |
|------|--------|--------|-------|---------|---------|------------------------------------------|----------------------------------------------------------------|
| 63   | 58     | 6      | 64    | 59      | 6       | 608.603010                               | 0.000247                                                       |
| 63   | 58     | 5      | 64    | 59      | 6       | 608.603010                               | 0.000247                                                       |
| 63   | 58     | 6      | 64    | 59      | 5       | 608.603010                               | 0.000247                                                       |
| 62   | 61     | 1      | 63    | 62      | 1       | 608.627490                               | 0.000147                                                       |
| 62   | 61     | 2      | 63    | 62      | 2       | 608.627490                               | 0.000147                                                       |
| 62   | 61     | 1      | 63    | 62      | 2       | 608.627490                               | 0.000147                                                       |
| 62   | 61     | 2      | 63    | 62      | 1       | 608.627490                               | 0.000147                                                       |
| 63   | 57     | 6      | 64    | 58      | 6       | 608.656230                               | 0.000053                                                       |
| 63   | 57     | 7      | 64    | 58      | 7       | 608.656230                               | 0.000053                                                       |
| 63   | 57     | 6      | 64    | 58      | 7       | 608.656230                               | 0.000053                                                       |
| 63   | 57     | 7      | 64    | 58      | 6       | 608.656230                               | 0.000053                                                       |
| 62   | 60     | 3      | 63    | 61      | 3       | 608.679920                               | 0.000085                                                       |
| 62   | 60     | 3      | 63    | 61      | 2       | 608.679920                               | 0.000085                                                       |
| 62   | 60     | 2      | 63    | 61      | 3       | 608.679920                               | 0.000085                                                       |
| 63   | 56     | 7      | 64    | 57      | 7       | 608.710160                               | 0.000244                                                       |
| 63   | 56     | 8      | 64    | 57      | 8       | 608.710160                               | 0.000244                                                       |
| 63   | 56     | 7      | 64    | 57      | 8       | 608.710160                               | 0.000244                                                       |
| 63   | 56     | 8      | 64    | 57      | 7       | 608.710160                               | 0.000244                                                       |
| 62   | 59     | 3      | 63    | 60      | 3       | 608.732450                               | 0.000044                                                       |
| 62   | 59     | 4      | 63    | 60      | 4       | 608.732450                               | 0.000044                                                       |
| 62   | 59     | 3      | 63    | 60      | 4       | 608.732450                               | 0.000044                                                       |
| 62   | 59     | 4      | 63    | 60      | 3       | 608.732450                               | 0.000044                                                       |
| 64   | 31     | 33     | 65    | 32      | 33      | 608.815360                               | 0.000238                                                       |
| 64   | 32     | 33     | 65    | 33      | 33      | 608.815360                               | 0.000238                                                       |
| 64   | 32     | 32     | 65    | 33      | 32      | 608.815360                               | 0.000123                                                       |
| 64   | 33     | 32     | 65    | 34      | 32      | 608.815360                               | 0.000123                                                       |
| 64   | 30     | 34     | 65    | 31      | 34      | 608.815360                               | -0.000023                                                      |
| 64   | 31     | 34     | 65    | 32      | 34      | 608.815360                               | -0.000023                                                      |
| 62   | 57     | 5      | 63    | 58      | 5       | 608.838150                               | 0.000237                                                       |
| 62   | 57     | 6      | 63    | 58      | 6       | 608.838150                               | 0.000237                                                       |
| 62   | 57     | 5      | 63    | 58      | 6       | 608.838150                               | 0.000237                                                       |
| 62   | 57     | 6      | 63    | 58      | 5       | 608.838150                               | 0.000237                                                       |
| 61   | 60     | 1      | 62    | 61      | 1       | 608.864070                               | 0.000159                                                       |
| 61   | 60     | 2      | 62    | 61      | 2       | 608.864070                               | 0.000159                                                       |
| 61   | 60     | 1      | 62    | 61      | 2       | 608.864070                               | 0.000159                                                       |
| 61   | 60     | 2      | 62    | 61      | 1       | 608.864070                               | 0.000159                                                       |
| 62   | 56     | 6      | 63    | 57      | 6       | 608.890990                               | 0.000008                                                       |
| 62   | 56     | 7      | 63    | 57      | 7       | 608.890990                               | 0.000008                                                       |
| 62   | 56     | 6      | 63    | 57      | 7       | 608.890990                               | 0.000008                                                       |
| 62   | 56     | 7      | 63    | 57      | 6       | 608.890990                               | 0.000008                                                       |
| 61   | 59     | 3      | 62    | 60      | 3       | 608.916120                               | 0.000104                                                       |
| 61   | 59     | 3      | 62    | 60      | 2       | 608.916120                               | 0.000104                                                       |
| 61   | 59     | 2      | 62    | 60      | 3       | 608.916120                               | 0.000104                                                       |
| 62   | 55     | 7      | 63    | 56      | 7       | 608.944450                               | 0.000064                                                       |
| 62   | 55     | 8      | 63    | 56      | 8       | 608.944450                               | 0.000064                                                       |
| 62   | 55     | 7      | 63    | 56      | 8       | 608.944450                               | 0.000064                                                       |

Continuation, see next page

Continuation of Table 28:  $\nu_{22} \leftarrow gs$  of dithiine.

| $J'$ | $K'_a$ | $K'_c$ | $J''$ | $K''_a$ | $K''_c$ | $\tilde{\nu}_{obs}$ | $(\tilde{\nu}_{obs} - \tilde{\nu}_{cal})$ |
|------|--------|--------|-------|---------|---------|---------------------|-------------------------------------------|
|      |        |        |       |         |         | /cm <sup>-1</sup>   | /cm <sup>-1</sup>                         |
| 62   | 55     | 8      | 63    | 56      | 7       | 608.944450          | 0.000064                                  |
| 61   | 58     | 3      | 62    | 59      | 3       | 608.968320          | 0.000108                                  |
| 61   | 58     | 4      | 62    | 59      | 4       | 608.968320          | 0.000108                                  |
| 61   | 58     | 3      | 62    | 59      | 4       | 608.968320          | 0.000108                                  |
| 61   | 58     | 4      | 62    | 59      | 3       | 608.968320          | 0.000108                                  |
| 63   | 32     | 32     | 64    | 33      | 32      | 609.036250          | 0.000021                                  |
| 63   | 31     | 32     | 64    | 32      | 32      | 609.036250          | 0.000021                                  |
| 63   | 31     | 33     | 64    | 32      | 33      | 609.036250          | -0.000060                                 |
| 63   | 30     | 33     | 64    | 31      | 33      | 609.036250          | -0.000060                                 |
| 61   | 56     | 5      | 62    | 57      | 5       | 609.073220          | 0.000241                                  |
| 61   | 56     | 6      | 62    | 57      | 6       | 609.073220          | 0.000241                                  |
| 61   | 56     | 5      | 62    | 57      | 6       | 609.073220          | 0.000241                                  |
| 61   | 56     | 6      | 62    | 57      | 5       | 609.073220          | 0.000241                                  |
| 60   | 59     | 1      | 61    | 60      | 1       | 609.100160          | -0.000211                                 |
| 60   | 59     | 2      | 61    | 60      | 2       | 609.100160          | -0.000211                                 |
| 60   | 59     | 1      | 61    | 60      | 2       | 609.100160          | -0.000211                                 |
| 60   | 59     | 2      | 61    | 60      | 1       | 609.100160          | -0.000211                                 |
| 61   | 55     | 6      | 62    | 56      | 6       | 609.125630          | -0.000065                                 |
| 61   | 55     | 7      | 62    | 56      | 7       | 609.125630          | -0.000065                                 |
| 61   | 55     | 6      | 62    | 56      | 7       | 609.125630          | -0.000065                                 |
| 61   | 55     | 7      | 62    | 56      | 6       | 609.125630          | -0.000065                                 |
| 60   | 58     | 3      | 61    | 59      | 3       | 609.152960          | 0.000860                                  |
| 60   | 58     | 3      | 61    | 59      | 2       | 609.152960          | 0.000860                                  |
| 60   | 58     | 2      | 61    | 59      | 3       | 609.152960          | 0.000860                                  |
| 61   | 54     | 7      | 62    | 55      | 7       | 609.178550          | -0.000221                                 |
| 61   | 54     | 8      | 62    | 55      | 8       | 609.178550          | -0.000221                                 |
| 61   | 54     | 7      | 62    | 55      | 8       | 609.178550          | -0.000221                                 |
| 61   | 54     | 8      | 62    | 55      | 7       | 609.178550          | -0.000221                                 |
| 60   | 57     | 3      | 61    | 58      | 3       | 609.203800          | -0.000116                                 |
| 60   | 57     | 4      | 61    | 58      | 4       | 609.203800          | -0.000116                                 |
| 60   | 57     | 3      | 61    | 58      | 4       | 609.203800          | -0.000116                                 |
| 60   | 57     | 4      | 61    | 58      | 3       | 609.203800          | -0.000116                                 |
| 62   | 31     | 32     | 63    | 32      | 32      | 609.257470          | 0.000096                                  |
| 62   | 30     | 32     | 63    | 31      | 32      | 609.257470          | 0.000096                                  |
| 62   | 31     | 31     | 63    | 32      | 31      | 609.257470          | -0.000014                                 |
| 62   | 32     | 31     | 63    | 33      | 31      | 609.257470          | -0.000014                                 |
| 62   | 29     | 33     | 63    | 30      | 33      | 609.257470          | -0.000175                                 |
| 62   | 30     | 33     | 63    | 31      | 33      | 609.257470          | -0.000175                                 |
| 60   | 55     | 5      | 61    | 56      | 5       | 609.308020          | 0.000070                                  |
| 60   | 55     | 6      | 61    | 56      | 6       | 609.308020          | 0.000070                                  |
| 60   | 55     | 5      | 61    | 56      | 6       | 609.308020          | 0.000070                                  |
| 60   | 55     | 6      | 61    | 56      | 5       | 609.308020          | 0.000070                                  |
| 59   | 58     | 1      | 60    | 59      | 1       | 609.336580          | -0.000148                                 |
| 59   | 58     | 2      | 60    | 59      | 2       | 609.336580          | -0.000148                                 |
| 59   | 58     | 1      | 60    | 59      | 2       | 609.336580          | -0.000148                                 |
| 59   | 58     | 2      | 60    | 59      | 1       | 609.336580          | -0.000148                                 |

Continuation, see next page

Continuation of Table 28:  $\nu_{22} \leftarrow gs$  of dithiine.

| $J'$ | $K'_a$ | $K'_c$ | $J''$ | $K''_a$ | $K''_c$ | $\tilde{\nu}_{obs}$<br>/cm <sup>-1</sup> | $(\tilde{\nu}_{obs} - \tilde{\nu}_{cal})$<br>/cm <sup>-1</sup> |
|------|--------|--------|-------|---------|---------|------------------------------------------|----------------------------------------------------------------|
| 60   | 54     | 6      | 61    | 55      | 6       | 609.360210                               | -0.000105                                                      |
| 60   | 54     | 7      | 61    | 55      | 7       | 609.360210                               | -0.000105                                                      |
| 60   | 54     | 6      | 61    | 55      | 7       | 609.360210                               | -0.000105                                                      |
| 60   | 54     | 7      | 61    | 55      | 6       | 609.360210                               | -0.000105                                                      |
| 59   | 57     | 3      | 60    | 58      | 3       | 609.388070                               | -0.000015                                                      |
| 59   | 57     | 3      | 60    | 58      | 2       | 609.388070                               | -0.000015                                                      |
| 59   | 57     | 2      | 60    | 58      | 3       | 609.388070                               | -0.000015                                                      |
| 59   | 56     | 3      | 60    | 57      | 3       | 609.439750                               | 0.000228                                                       |
| 59   | 56     | 4      | 60    | 57      | 4       | 609.439750                               | 0.000228                                                       |
| 59   | 56     | 3      | 60    | 57      | 4       | 609.439750                               | 0.000228                                                       |
| 59   | 56     | 4      | 60    | 57      | 3       | 609.439750                               | 0.000228                                                       |
| 61   | 31     | 31     | 62    | 32      | 31      | 609.478920                               | 0.000336                                                       |
| 61   | 30     | 31     | 62    | 31      | 31      | 609.478920                               | 0.000336                                                       |
| 61   | 29     | 32     | 62    | 30      | 32      | 609.478920                               | 0.000245                                                       |
| 61   | 30     | 32     | 62    | 31      | 32      | 609.478920                               | 0.000245                                                       |
| 61   | 31     | 30     | 62    | 32      | 30      | 609.478920                               | 0.000021                                                       |
| 61   | 32     | 30     | 62    | 33      | 30      | 609.478920                               | 0.000021                                                       |
| 61   | 29     | 33     | 62    | 30      | 33      | 609.478920                               | -0.000213                                                      |
| 61   | 28     | 33     | 62    | 29      | 33      | 609.478920                               | -0.000213                                                      |
| 59   | 55     | 4      | 60    | 56      | 4       | 609.491300                               | 0.000210                                                       |
| 59   | 55     | 5      | 60    | 56      | 5       | 609.491300                               | 0.000210                                                       |
| 59   | 55     | 4      | 60    | 56      | 5       | 609.491300                               | 0.000210                                                       |
| 59   | 55     | 5      | 60    | 56      | 4       | 609.491300                               | 0.000210                                                       |
| 59   | 54     | 5      | 60    | 55      | 5       | 609.542430                               | -0.000402                                                      |
| 59   | 54     | 6      | 60    | 55      | 6       | 609.542430                               | -0.000402                                                      |
| 59   | 54     | 5      | 60    | 55      | 6       | 609.542430                               | -0.000402                                                      |
| 59   | 54     | 6      | 60    | 55      | 5       | 609.542430                               | -0.000402                                                      |
| 58   | 57     | 1      | 59    | 58      | 1       | 609.573100                               | 0.000127                                                       |
| 58   | 57     | 2      | 59    | 58      | 2       | 609.573100                               | 0.000127                                                       |
| 58   | 57     | 1      | 59    | 58      | 2       | 609.573100                               | 0.000127                                                       |
| 58   | 57     | 2      | 59    | 58      | 1       | 609.573100                               | 0.000127                                                       |
| 59   | 53     | 6      | 60    | 54      | 6       | 609.594800                               | -0.000052                                                      |
| 59   | 53     | 7      | 60    | 54      | 7       | 609.594800                               | -0.000052                                                      |
| 59   | 53     | 6      | 60    | 54      | 7       | 609.594800                               | -0.000052                                                      |
| 59   | 53     | 7      | 60    | 54      | 6       | 609.594800                               | -0.000052                                                      |
| 58   | 56     | 3      | 59    | 57      | 3       | 609.623880                               | -0.000081                                                      |
| 58   | 56     | 3      | 59    | 57      | 2       | 609.623880                               | -0.000081                                                      |
| 58   | 56     | 2      | 59    | 57      | 3       | 609.623880                               | -0.000081                                                      |
| 59   | 52     | 7      | 60    | 53      | 7       | 609.647830                               | 0.000538                                                       |
| 59   | 52     | 8      | 60    | 53      | 8       | 609.647830                               | 0.000538                                                       |
| 59   | 52     | 7      | 60    | 53      | 8       | 609.647830                               | 0.000538                                                       |
| 59   | 52     | 8      | 60    | 53      | 7       | 609.647830                               | 0.000538                                                       |
| 58   | 55     | 3      | 59    | 56      | 3       | 609.675020                               | -0.000006                                                      |
| 58   | 55     | 4      | 59    | 56      | 4       | 609.675020                               | -0.000006                                                      |
| 58   | 55     | 3      | 59    | 56      | 4       | 609.675020                               | -0.000006                                                      |
| 58   | 55     | 4      | 59    | 56      | 3       | 609.675020                               | -0.000006                                                      |

Continuation, see next page

Continuation of Table 28:  $\nu_{22} \leftarrow gs$  of dithiine.

| $J'$ | $K'_a$ | $K'_c$ | $J''$ | $K''_a$ | $K''_c$ | $\tilde{\nu}_{obs}$<br>/cm <sup>-1</sup> | $(\tilde{\nu}_{obs} - \tilde{\nu}_{cal})$<br>/cm <sup>-1</sup> |
|------|--------|--------|-------|---------|---------|------------------------------------------|----------------------------------------------------------------|
| 60   | 30     | 30     | 61    | 31      | 30      | 609.700270                               | 0.000338                                                       |
| 60   | 31     | 30     | 61    | 32      | 30      | 609.700270                               | 0.000338                                                       |
| 60   | 28     | 32     | 61    | 29      | 32      | 609.700270                               | 0.000156                                                       |
| 60   | 29     | 32     | 61    | 30      | 32      | 609.700270                               | 0.000156                                                       |
| 60   | 31     | 29     | 61    | 32      | 29      | 609.700270                               | -0.000197                                                      |
| 60   | 32     | 29     | 61    | 33      | 29      | 609.700270                               | -0.000197                                                      |
| 58   | 54     | 4      | 59    | 55      | 4       | 609.726220                               | -0.000013                                                      |
| 58   | 54     | 5      | 59    | 55      | 5       | 609.726220                               | -0.000013                                                      |
| 58   | 54     | 4      | 59    | 55      | 5       | 609.726220                               | -0.000013                                                      |
| 58   | 54     | 5      | 59    | 55      | 4       | 609.726220                               | -0.000013                                                      |
| 58   | 53     | 5      | 59    | 54      | 5       | 609.777790                               | 0.000166                                                       |
| 58   | 53     | 6      | 59    | 54      | 6       | 609.777790                               | 0.000166                                                       |
| 58   | 53     | 5      | 59    | 54      | 6       | 609.777790                               | 0.000166                                                       |
| 58   | 53     | 6      | 59    | 54      | 5       | 609.777790                               | 0.000166                                                       |
| 57   | 56     | 1      | 58    | 57      | 1       | 609.809070                               | -0.000038                                                      |
| 57   | 56     | 2      | 58    | 57      | 2       | 609.809070                               | -0.000038                                                      |
| 57   | 56     | 1      | 58    | 57      | 2       | 609.809070                               | -0.000038                                                      |
| 57   | 56     | 2      | 58    | 57      | 1       | 609.809070                               | -0.000038                                                      |
| 58   | 52     | 6      | 59    | 53      | 6       | 609.829820                               | 0.000517                                                       |
| 58   | 52     | 7      | 59    | 53      | 7       | 609.829820                               | 0.000517                                                       |
| 58   | 52     | 6      | 59    | 53      | 7       | 609.829820                               | 0.000517                                                       |
| 58   | 52     | 7      | 59    | 53      | 6       | 609.829820                               | 0.000517                                                       |
| 57   | 55     | 3      | 58    | 56      | 3       | 609.860260                               | 0.000529                                                       |
| 57   | 55     | 3      | 58    | 56      | 2       | 609.860260                               | 0.000529                                                       |
| 57   | 55     | 2      | 58    | 56      | 3       | 609.860260                               | 0.000529                                                       |
| 58   | 51     | 7      | 59    | 52      | 7       | 609.881930                               | 0.000500                                                       |
| 58   | 51     | 8      | 59    | 52      | 8       | 609.881930                               | 0.000500                                                       |
| 58   | 51     | 7      | 59    | 52      | 8       | 609.881930                               | 0.000500                                                       |
| 58   | 51     | 8      | 59    | 52      | 7       | 609.881930                               | 0.000500                                                       |
| 57   | 54     | 3      | 58    | 55      | 3       | 609.910390                               | -0.000047                                                      |
| 57   | 54     | 4      | 58    | 55      | 4       | 609.910390                               | -0.000047                                                      |
| 57   | 54     | 3      | 58    | 55      | 4       | 609.910390                               | -0.000047                                                      |
| 57   | 54     | 4      | 58    | 55      | 3       | 609.910390                               | -0.000047                                                      |
| 59   | 30     | 30     | 60    | 31      | 30      | 609.921500                               | 0.000358                                                       |
| 59   | 29     | 30     | 60    | 30      | 30      | 609.921500                               | 0.000358                                                       |
| 59   | 29     | 31     | 60    | 30      | 31      | 609.921500                               | 0.000256                                                       |
| 59   | 28     | 31     | 60    | 29      | 31      | 609.921500                               | 0.000256                                                       |
| 59   | 30     | 29     | 60    | 31      | 29      | 609.921500                               | 0.000046                                                       |
| 59   | 31     | 29     | 60    | 32      | 29      | 609.921500                               | 0.000046                                                       |
| 59   | 28     | 32     | 60    | 29      | 32      | 609.921500                               | -0.000219                                                      |
| 59   | 27     | 32     | 60    | 28      | 32      | 609.921500                               | -0.000219                                                      |
| 57   | 53     | 4      | 58    | 54      | 4       | 609.961240                               | -0.000033                                                      |
| 57   | 53     | 5      | 58    | 54      | 5       | 609.961240                               | -0.000033                                                      |
| 57   | 53     | 4      | 58    | 54      | 5       | 609.961240                               | -0.000033                                                      |
| 57   | 53     | 5      | 58    | 54      | 4       | 609.961240                               | -0.000033                                                      |
| 57   | 52     | 5      | 58    | 53      | 5       | 610.012220                               | -0.000093                                                      |

Continuation, see next page

Continuation of Table 28:  $\nu_{22} \leftarrow gs$  of dithiine.

| $J'$ | $K'_a$ | $K'_c$ | $J''$ | $K''_a$ | $K''_c$ | $\tilde{\nu}_{obs}$<br>/cm <sup>-1</sup> | $(\tilde{\nu}_{obs} - \tilde{\nu}_{cat})$<br>/cm <sup>-1</sup> |
|------|--------|--------|-------|---------|---------|------------------------------------------|----------------------------------------------------------------|
| 57   | 52     | 6      | 58    | 53      | 6       | 610.012220                               | -0.000093                                                      |
| 57   | 52     | 5      | 58    | 53      | 6       | 610.012220                               | -0.000093                                                      |
| 57   | 52     | 6      | 58    | 53      | 5       | 610.012220                               | -0.000093                                                      |
| 56   | 55     | 1      | 57    | 56      | 1       | 610.044950                               | -0.000184                                                      |
| 56   | 55     | 2      | 57    | 56      | 2       | 610.044950                               | -0.000184                                                      |
| 56   | 55     | 1      | 57    | 56      | 2       | 610.044950                               | -0.000184                                                      |
| 56   | 55     | 2      | 57    | 56      | 1       | 610.044950                               | -0.000184                                                      |
| 57   | 51     | 6      | 58    | 52      | 6       | 610.063600                               | -0.000068                                                      |
| 57   | 51     | 7      | 58    | 52      | 7       | 610.063600                               | -0.000068                                                      |
| 57   | 51     | 6      | 58    | 52      | 7       | 610.063600                               | -0.000068                                                      |
| 57   | 51     | 7      | 58    | 52      | 6       | 610.063600                               | -0.000068                                                      |
| 56   | 54     | 3      | 57    | 55      | 3       | 610.095310                               | -0.000080                                                      |
| 56   | 54     | 3      | 57    | 55      | 2       | 610.095310                               | -0.000080                                                      |
| 56   | 54     | 2      | 57    | 55      | 3       | 610.095310                               | -0.000080                                                      |
| 57   | 50     | 7      | 58    | 51      | 7       | 610.115180                               | -0.000315                                                      |
| 57   | 50     | 8      | 58    | 51      | 8       | 610.115180                               | -0.000315                                                      |
| 57   | 50     | 7      | 58    | 51      | 8       | 610.115180                               | -0.000316                                                      |
| 57   | 50     | 8      | 58    | 51      | 7       | 610.115180                               | -0.000315                                                      |
| 58   | 28     | 30     | 59    | 29      | 30      | 610.142660                               | 0.000158                                                       |
| 58   | 29     | 30     | 59    | 30      | 30      | 610.142660                               | 0.000158                                                       |
| 58   | 29     | 29     | 59    | 30      | 29      | 610.142660                               | 0.000062                                                       |
| 58   | 30     | 29     | 59    | 31      | 29      | 610.142660                               | 0.000062                                                       |
| 58   | 27     | 31     | 59    | 28      | 31      | 610.142660                               | -0.000143                                                      |
| 58   | 28     | 31     | 59    | 29      | 31      | 610.142660                               | -0.000143                                                      |
| 56   | 53     | 3      | 57    | 54      | 3       | 610.145660                               | -0.000068                                                      |
| 56   | 53     | 4      | 57    | 54      | 4       | 610.145660                               | -0.000068                                                      |
| 56   | 53     | 3      | 57    | 54      | 4       | 610.145660                               | -0.000068                                                      |
| 56   | 53     | 4      | 57    | 54      | 3       | 610.145660                               | -0.000068                                                      |
| 56   | 52     | 4      | 57    | 53      | 4       | 610.196230                               | 0.000025                                                       |
| 56   | 52     | 5      | 57    | 53      | 5       | 610.196230                               | 0.000025                                                       |
| 56   | 52     | 4      | 57    | 53      | 5       | 610.196230                               | 0.000025                                                       |
| 56   | 52     | 5      | 57    | 53      | 4       | 610.196230                               | 0.000025                                                       |
| 56   | 51     | 5      | 57    | 52      | 5       | 610.246850                               | -0.000056                                                      |
| 56   | 51     | 6      | 57    | 52      | 6       | 610.246850                               | -0.000056                                                      |
| 56   | 51     | 5      | 57    | 52      | 6       | 610.246850                               | -0.000056                                                      |
| 56   | 51     | 6      | 57    | 52      | 5       | 610.246850                               | -0.000056                                                      |
| 55   | 54     | 1      | 56    | 55      | 1       | 610.280970                               | -0.000064                                                      |
| 55   | 54     | 2      | 56    | 55      | 2       | 610.280970                               | -0.000064                                                      |
| 55   | 54     | 1      | 56    | 55      | 2       | 610.280970                               | -0.000064                                                      |
| 55   | 54     | 2      | 56    | 55      | 1       | 610.280970                               | -0.000064                                                      |
| 56   | 50     | 6      | 57    | 51      | 6       | 610.298000                               | 0.000072                                                       |
| 56   | 50     | 7      | 57    | 51      | 7       | 610.298000                               | 0.000072                                                       |
| 56   | 50     | 6      | 57    | 51      | 7       | 610.298000                               | 0.000072                                                       |
| 56   | 50     | 7      | 57    | 51      | 6       | 610.298000                               | 0.000072                                                       |
| 55   | 53     | 3      | 56    | 54      | 3       | 610.330840                               | -0.000091                                                      |
| 55   | 53     | 3      | 56    | 54      | 2       | 610.330840                               | -0.000091                                                      |

Continuation, see next page

Continuation of Table 28:  $\nu_{22} \leftarrow gs$  of dithiine.

| $J'$ | $K'_a$ | $K'_c$ | $J''$ | $K''_a$ | $K''_c$ | $\tilde{\nu}_{obs}$<br>/cm <sup>-1</sup> | $(\tilde{\nu}_{obs} - \tilde{\nu}_{cal})$<br>/cm <sup>-1</sup> |
|------|--------|--------|-------|---------|---------|------------------------------------------|----------------------------------------------------------------|
| 55   | 53     | 2      | 56    | 54      | 3       | 610.330840                               | -0.000091                                                      |
| 56   | 49     | 7      | 57    | 50      | 7       | 610.349560                               | 0.000101                                                       |
| 56   | 49     | 8      | 57    | 50      | 8       | 610.349560                               | 0.000101                                                       |
| 56   | 49     | 7      | 57    | 50      | 8       | 610.349560                               | 0.000101                                                       |
| 56   | 49     | 8      | 57    | 50      | 7       | 610.349560                               | 0.000102                                                       |
| 57   | 29     | 28     | 58    | 30      | 28      | 610.364350                               | 0.000133                                                       |
| 57   | 30     | 28     | 58    | 31      | 28      | 610.364350                               | 0.000133                                                       |
| 57   | 27     | 31     | 58    | 28      | 31      | 610.364350                               | -0.000165                                                      |
| 57   | 26     | 31     | 58    | 27      | 31      | 610.364350                               | -0.000165                                                      |
| 55   | 52     | 3      | 56    | 53      | 3       | 610.380860                               | -0.000047                                                      |
| 55   | 52     | 4      | 56    | 53      | 4       | 610.380860                               | -0.000047                                                      |
| 55   | 52     | 3      | 56    | 53      | 4       | 610.380860                               | -0.000047                                                      |
| 55   | 52     | 4      | 56    | 53      | 3       | 610.380860                               | -0.000047                                                      |
| 55   | 51     | 4      | 56    | 52      | 4       | 610.430980                               | -0.000063                                                      |
| 55   | 51     | 5      | 56    | 52      | 5       | 610.430980                               | -0.000063                                                      |
| 55   | 51     | 4      | 56    | 52      | 5       | 610.430980                               | -0.000063                                                      |
| 55   | 51     | 5      | 56    | 52      | 4       | 610.430980                               | -0.000063                                                      |
| 55   | 50     | 5      | 56    | 51      | 5       | 610.481390                               | -0.000009                                                      |
| 55   | 50     | 6      | 56    | 51      | 6       | 610.481390                               | -0.000009                                                      |
| 55   | 50     | 5      | 56    | 51      | 6       | 610.481390                               | -0.000009                                                      |
| 55   | 50     | 6      | 56    | 51      | 5       | 610.481390                               | -0.000009                                                      |
| 54   | 53     | 1      | 55    | 54      | 1       | 610.516570                               | -0.000242                                                      |
| 54   | 53     | 2      | 55    | 54      | 2       | 610.516570                               | -0.000242                                                      |
| 54   | 53     | 1      | 55    | 54      | 2       | 610.516570                               | -0.000242                                                      |
| 54   | 53     | 2      | 55    | 54      | 1       | 610.516570                               | -0.000242                                                      |
| 55   | 49     | 6      | 56    | 50      | 6       | 610.532150                               | 0.000042                                                       |
| 55   | 49     | 7      | 56    | 50      | 7       | 610.532150                               | 0.000042                                                       |
| 55   | 49     | 6      | 56    | 50      | 7       | 610.532150                               | 0.000042                                                       |
| 55   | 49     | 7      | 56    | 50      | 6       | 610.532150                               | 0.000042                                                       |
| 54   | 52     | 3      | 55    | 53      | 3       | 610.566340                               | -0.000013                                                      |
| 54   | 52     | 3      | 55    | 53      | 2       | 610.566340                               | -0.000013                                                      |
| 54   | 52     | 2      | 55    | 53      | 3       | 610.566340                               | -0.000013                                                      |
| 55   | 48     | 7      | 56    | 49      | 7       | 610.583310                               | -0.000041                                                      |
| 55   | 48     | 8      | 56    | 49      | 8       | 610.583310                               | -0.000040                                                      |
| 55   | 48     | 7      | 56    | 49      | 8       | 610.583310                               | -0.000041                                                      |
| 55   | 48     | 8      | 56    | 49      | 7       | 610.583310                               | -0.000039                                                      |
| 56   | 28     | 29     | 57    | 29      | 29      | 610.585640                               | 0.000263                                                       |
| 56   | 27     | 29     | 57    | 28      | 29      | 610.585640                               | 0.000263                                                       |
| 56   | 28     | 28     | 57    | 29      | 28      | 610.585640                               | 0.000174                                                       |
| 56   | 29     | 28     | 57    | 30      | 28      | 610.585640                               | 0.000174                                                       |
| 56   | 27     | 30     | 57    | 28      | 30      | 610.585640                               | -0.000054                                                      |
| 56   | 26     | 30     | 57    | 27      | 30      | 610.585640                               | -0.000054                                                      |
| 54   | 51     | 3      | 55    | 52      | 3       | 610.615060                               | -0.000923                                                      |
| 54   | 51     | 4      | 55    | 52      | 4       | 610.615060                               | -0.000923                                                      |
| 54   | 51     | 3      | 55    | 52      | 4       | 610.615060                               | -0.000923                                                      |
| 54   | 51     | 4      | 55    | 52      | 3       | 610.615060                               | -0.000923                                                      |

Continuation, see next page

Continuation of Table 28:  $\nu_{22} \leftarrow gs$  of dithiine.

| $J'$ | $K'_a$ | $K'_c$ | $J''$ | $K''_a$ | $K''_c$ | $\tilde{\nu}_{obs}$<br>/cm <sup>-1</sup> | $(\tilde{\nu}_{obs} - \tilde{\nu}_{cal})$<br>/cm <sup>-1</sup> |
|------|--------|--------|-------|---------|---------|------------------------------------------|----------------------------------------------------------------|
| 54   | 50     | 4      | 55    | 51      | 4       | 610.665520                               | -0.000245                                                      |
| 54   | 50     | 5      | 55    | 51      | 5       | 610.665520                               | -0.000245                                                      |
| 54   | 50     | 4      | 55    | 51      | 5       | 610.665520                               | -0.000245                                                      |
| 54   | 50     | 5      | 55    | 51      | 4       | 610.665520                               | -0.000245                                                      |
| 54   | 49     | 5      | 55    | 50      | 5       | 610.715500                               | -0.000292                                                      |
| 54   | 49     | 6      | 55    | 50      | 6       | 610.715500                               | -0.000292                                                      |
| 54   | 49     | 5      | 55    | 50      | 6       | 610.715500                               | -0.000292                                                      |
| 54   | 49     | 6      | 55    | 50      | 5       | 610.715500                               | -0.000292                                                      |
| 53   | 52     | 1      | 54    | 53      | 1       | 610.752370                               | -0.000100                                                      |
| 53   | 52     | 2      | 54    | 53      | 2       | 610.752370                               | -0.000100                                                      |
| 53   | 52     | 1      | 54    | 53      | 2       | 610.752370                               | -0.000100                                                      |
| 53   | 52     | 2      | 54    | 53      | 1       | 610.752370                               | -0.000100                                                      |
| 54   | 48     | 6      | 55    | 49      | 6       | 610.765900                               | -0.000288                                                      |
| 54   | 48     | 7      | 55    | 49      | 7       | 610.765900                               | -0.000288                                                      |
| 54   | 48     | 6      | 55    | 49      | 7       | 610.765900                               | -0.000288                                                      |
| 54   | 48     | 7      | 55    | 49      | 6       | 610.765900                               | -0.000288                                                      |
| 53   | 51     | 3      | 54    | 52      | 3       | 610.801380                               | -0.000273                                                      |
| 53   | 51     | 3      | 54    | 52      | 2       | 610.801380                               | -0.000273                                                      |
| 53   | 51     | 2      | 54    | 52      | 3       | 610.801380                               | -0.000273                                                      |
| 55   | 28     | 28     | 56    | 29      | 28      | 610.807150                               | 0.000258                                                       |
| 55   | 27     | 28     | 56    | 28      | 28      | 610.807150                               | 0.000258                                                       |
| 55   | 26     | 29     | 56    | 27      | 29      | 610.807150                               | 0.000133                                                       |
| 55   | 27     | 29     | 56    | 28      | 29      | 610.807150                               | 0.000133                                                       |
| 55   | 28     | 27     | 56    | 29      | 27      | 610.807150                               | -0.000050                                                      |
| 55   | 29     | 27     | 56    | 30      | 27      | 610.807150                               | -0.000050                                                      |
| 54   | 47     | 7      | 55    | 48      | 7       | 610.817280                               | 0.000117                                                       |
| 54   | 47     | 8      | 55    | 48      | 8       | 610.817280                               | 0.000118                                                       |
| 54   | 47     | 7      | 55    | 48      | 8       | 610.817280                               | 0.000115                                                       |
| 54   | 47     | 8      | 55    | 48      | 7       | 610.817280                               | 0.000120                                                       |
| 53   | 50     | 3      | 54    | 51      | 3       | 610.850360                               | -0.000582                                                      |
| 53   | 50     | 4      | 54    | 51      | 4       | 610.850360                               | -0.000582                                                      |
| 53   | 50     | 3      | 54    | 51      | 4       | 610.850360                               | -0.000582                                                      |
| 53   | 50     | 4      | 54    | 51      | 3       | 610.850360                               | -0.000582                                                      |
| 53   | 49     | 4      | 54    | 50      | 4       | 610.900360                               | -0.000020                                                      |
| 53   | 49     | 5      | 54    | 50      | 5       | 610.900360                               | -0.000020                                                      |
| 53   | 49     | 4      | 54    | 50      | 5       | 610.900360                               | -0.000020                                                      |
| 53   | 49     | 5      | 54    | 50      | 4       | 610.900360                               | -0.000020                                                      |
| 53   | 48     | 5      | 54    | 49      | 5       | 610.949950                               | -0.000122                                                      |
| 53   | 48     | 6      | 54    | 49      | 6       | 610.949950                               | -0.000122                                                      |
| 53   | 48     | 5      | 54    | 49      | 6       | 610.949950                               | -0.000122                                                      |
| 53   | 48     | 6      | 54    | 49      | 5       | 610.949950                               | -0.000122                                                      |
| 52   | 51     | 1      | 53    | 52      | 1       | 610.987800                               | -0.000181                                                      |
| 52   | 51     | 2      | 53    | 52      | 2       | 610.987800                               | -0.000181                                                      |
| 52   | 51     | 1      | 53    | 52      | 2       | 610.987800                               | -0.000181                                                      |
| 52   | 51     | 2      | 53    | 52      | 1       | 610.987800                               | -0.000181                                                      |
| 53   | 47     | 6      | 54    | 48      | 6       | 611.000230                               | 0.000061                                                       |

Continuation, see next page

Continuation of Table 28:  $\nu_{22} \leftarrow gs$  of dithiine.

| $J'$ | $K'_a$ | $K'_c$ | $J''$ | $K''_a$ | $K''_c$ | $\tilde{\nu}_{obs}$<br>/cm <sup>-1</sup> | $(\tilde{\nu}_{obs} - \tilde{\nu}_{cal})$<br>/cm <sup>-1</sup> |
|------|--------|--------|-------|---------|---------|------------------------------------------|----------------------------------------------------------------|
| 53   | 47     | 7      | 54    | 48      | 7       | 611.000230                               | 0.000061                                                       |
| 53   | 47     | 6      | 54    | 48      | 7       | 611.000230                               | 0.000061                                                       |
| 53   | 47     | 7      | 54    | 48      | 6       | 611.000230                               | 0.000061                                                       |
| 54   | 26     | 28     | 55    | 27      | 28      | 611.028860                               | 0.000386                                                       |
| 54   | 27     | 28     | 55    | 28      | 28      | 611.028860                               | 0.000386                                                       |
| 54   | 27     | 27     | 55    | 28      | 27      | 611.028860                               | 0.000303                                                       |
| 54   | 28     | 27     | 55    | 29      | 27      | 611.028860                               | 0.000303                                                       |
| 54   | 25     | 29     | 55    | 26      | 29      | 611.028860                               | 0.000056                                                       |
| 54   | 26     | 29     | 55    | 27      | 29      | 611.028860                               | 0.000056                                                       |
| 54   | 28     | 26     | 55    | 29      | 26      | 611.028860                               | -0.000244                                                      |
| 54   | 29     | 26     | 55    | 30      | 26      | 611.028860                               | -0.000244                                                      |
| 52   | 50     | 3      | 53    | 51      | 3       | 611.037310                               | 0.000480                                                       |
| 52   | 50     | 3      | 53    | 51      | 2       | 611.037310                               | 0.000480                                                       |
| 52   | 50     | 2      | 53    | 51      | 3       | 611.037310                               | 0.000480                                                       |
| 53   | 46     | 7      | 54    | 47      | 7       | 611.051600                               | 0.000717                                                       |
| 53   | 46     | 8      | 54    | 47      | 8       | 611.051600                               | 0.000720                                                       |
| 53   | 46     | 7      | 54    | 47      | 8       | 611.051600                               | 0.000714                                                       |
| 53   | 46     | 8      | 54    | 47      | 7       | 611.051600                               | 0.000722                                                       |
| 52   | 49     | 3      | 53    | 50      | 3       | 611.085670                               | -0.000098                                                      |
| 52   | 49     | 4      | 53    | 50      | 4       | 611.085670                               | -0.000098                                                      |
| 52   | 49     | 3      | 53    | 50      | 4       | 611.085670                               | -0.000098                                                      |
| 52   | 49     | 4      | 53    | 50      | 3       | 611.085670                               | -0.000098                                                      |
| 52   | 48     | 4      | 53    | 49      | 4       | 611.134800                               | -0.000077                                                      |
| 52   | 48     | 5      | 53    | 49      | 5       | 611.134800                               | -0.000077                                                      |
| 52   | 48     | 4      | 53    | 49      | 5       | 611.134800                               | -0.000077                                                      |
| 52   | 48     | 5      | 53    | 49      | 4       | 611.134800                               | -0.000077                                                      |
| 52   | 47     | 5      | 53    | 48      | 5       | 611.184410                               | 0.000160                                                       |
| 52   | 47     | 6      | 53    | 48      | 6       | 611.184410                               | 0.000160                                                       |
| 52   | 47     | 5      | 53    | 48      | 6       | 611.184410                               | 0.000160                                                       |
| 52   | 47     | 6      | 53    | 48      | 5       | 611.184410                               | 0.000160                                                       |
| 51   | 50     | 1      | 52    | 51      | 1       | 611.222770                               | -0.000593                                                      |
| 51   | 50     | 2      | 52    | 51      | 2       | 611.222770                               | -0.000593                                                      |
| 51   | 50     | 1      | 52    | 51      | 2       | 611.222770                               | -0.000593                                                      |
| 51   | 50     | 2      | 52    | 51      | 1       | 611.222770                               | -0.000593                                                      |
| 53   | 26     | 28     | 54    | 27      | 28      | 611.250580                               | 0.000371                                                       |
| 53   | 25     | 28     | 54    | 26      | 28      | 611.250580                               | 0.000371                                                       |
| 53   | 28     | 26     | 54    | 29      | 26      | 611.250580                               | 0.000194                                                       |
| 53   | 27     | 26     | 54    | 28      | 26      | 611.250580                               | 0.000194                                                       |
| 53   | 25     | 29     | 54    | 26      | 29      | 611.250580                               | -0.000158                                                      |
| 53   | 24     | 29     | 54    | 25      | 29      | 611.250580                               | -0.000158                                                      |
| 52   | 45     | 7      | 53    | 46      | 7       | 611.284530                               | 0.000004                                                       |
| 52   | 45     | 8      | 53    | 46      | 8       | 611.284530                               | 0.000009                                                       |
| 52   | 45     | 7      | 53    | 46      | 8       | 611.284530                               | -0.000001                                                      |
| 52   | 45     | 8      | 53    | 46      | 7       | 611.284530                               | 0.000014                                                       |
| 51   | 48     | 3      | 52    | 49      | 3       | 611.320230                               | -0.000246                                                      |
| 51   | 48     | 4      | 52    | 49      | 4       | 611.320230                               | -0.000246                                                      |

Continuation, see next page

Continuation of Table 28:  $\nu_{22} \leftarrow gs$  of dithiine.

| $J'$ | $K'_a$ | $K'_c$ | $J''$ | $K''_a$ | $K''_c$ | $\tilde{\nu}_{obs}$<br>/cm <sup>-1</sup> | $(\tilde{\nu}_{obs} - \tilde{\nu}_{cal})$<br>/cm <sup>-1</sup> |
|------|--------|--------|-------|---------|---------|------------------------------------------|----------------------------------------------------------------|
| 51   | 48     | 3      | 52    | 49      | 4       | 611.320230                               | -0.000246                                                      |
| 51   | 48     | 4      | 52    | 49      | 3       | 611.320230                               | -0.000246                                                      |
| 51   | 47     | 4      | 52    | 48      | 4       | 611.369260                               | 0.000005                                                       |
| 51   | 47     | 5      | 52    | 48      | 5       | 611.369260                               | 0.000005                                                       |
| 51   | 47     | 4      | 52    | 48      | 5       | 611.369260                               | 0.000005                                                       |
| 51   | 47     | 5      | 52    | 48      | 4       | 611.369260                               | 0.000005                                                       |
| 51   | 46     | 5      | 52    | 47      | 5       | 611.417990                               | -0.000327                                                      |
| 51   | 46     | 6      | 52    | 47      | 6       | 611.417990                               | -0.000327                                                      |
| 51   | 46     | 5      | 52    | 47      | 6       | 611.417990                               | -0.000327                                                      |
| 51   | 46     | 6      | 52    | 47      | 5       | 611.417990                               | -0.000327                                                      |
| 50   | 49     | 1      | 51    | 50      | 1       | 611.458600                               | -0.000006                                                      |
| 50   | 49     | 2      | 51    | 50      | 2       | 611.458600                               | -0.000006                                                      |
| 50   | 49     | 1      | 51    | 50      | 2       | 611.458600                               | -0.000006                                                      |
| 50   | 49     | 2      | 51    | 50      | 1       | 611.458600                               | -0.000006                                                      |
| 51   | 45     | 6      | 52    | 46      | 6       | 611.467280                               | -0.000554                                                      |
| 51   | 45     | 7      | 52    | 46      | 7       | 611.467280                               | -0.000554                                                      |
| 51   | 45     | 6      | 52    | 46      | 7       | 611.467280                               | -0.000555                                                      |
| 51   | 45     | 7      | 52    | 46      | 6       | 611.467280                               | -0.000553                                                      |
| 52   | 25     | 27     | 53    | 26      | 27      | 611.472130                               | 0.000387                                                       |
| 52   | 26     | 27     | 53    | 27      | 27      | 611.472130                               | 0.000387                                                       |
| 52   | 27     | 26     | 53    | 28      | 26      | 611.472130                               | 0.000306                                                       |
| 52   | 26     | 26     | 53    | 27      | 26      | 611.472130                               | 0.000306                                                       |
| 52   | 24     | 28     | 53    | 25      | 28      | 611.472130                               | 0.000046                                                       |
| 52   | 25     | 28     | 53    | 26      | 28      | 611.472130                               | 0.000046                                                       |
| 52   | 27     | 25     | 53    | 28      | 25      | 611.472130                               | -0.000252                                                      |
| 52   | 28     | 25     | 53    | 29      | 25      | 611.472130                               | -0.000252                                                      |
| 50   | 48     | 3      | 51    | 49      | 3       | 611.506470                               | -0.000312                                                      |
| 50   | 48     | 3      | 51    | 49      | 2       | 611.506470                               | -0.000312                                                      |
| 50   | 48     | 2      | 51    | 49      | 3       | 611.506470                               | -0.000312                                                      |
| 51   | 44     | 7      | 52    | 45      | 7       | 611.518160                               | 0.000085                                                       |
| 51   | 44     | 8      | 52    | 45      | 8       | 611.518160                               | 0.000094                                                       |
| 51   | 44     | 7      | 52    | 45      | 8       | 611.518160                               | 0.000076                                                       |
| 51   | 44     | 8      | 52    | 45      | 7       | 611.518160                               | 0.000103                                                       |
| 50   | 47     | 3      | 51    | 48      | 3       | 611.554920                               | -0.000137                                                      |
| 50   | 47     | 4      | 51    | 48      | 4       | 611.554920                               | -0.000137                                                      |
| 50   | 47     | 3      | 51    | 48      | 4       | 611.554920                               | -0.000137                                                      |
| 50   | 47     | 4      | 51    | 48      | 3       | 611.554920                               | -0.000137                                                      |
| 50   | 46     | 4      | 51    | 47      | 4       | 611.603210                               | -0.000308                                                      |
| 50   | 46     | 5      | 51    | 47      | 5       | 611.603210                               | -0.000308                                                      |
| 50   | 46     | 4      | 51    | 47      | 5       | 611.603210                               | -0.000308                                                      |
| 50   | 46     | 5      | 51    | 47      | 4       | 611.603210                               | -0.000308                                                      |
| 50   | 45     | 5      | 51    | 46      | 5       | 611.652190                               | -0.000082                                                      |
| 50   | 45     | 6      | 51    | 46      | 6       | 611.652190                               | -0.000082                                                      |
| 50   | 45     | 5      | 51    | 46      | 6       | 611.652190                               | -0.000082                                                      |
| 50   | 45     | 6      | 51    | 46      | 5       | 611.652190                               | -0.000082                                                      |
| 49   | 48     | 1      | 50    | 49      | 1       | 611.693610                               | -0.000091                                                      |

Continuation, see next page

Continuation of Table 28:  $\nu_{22} \leftarrow gs$  of dithiine.

| $J'$ | $K'_a$ | $K'_c$ | $J''$ | $K''_a$ | $K''_c$ | $\tilde{\nu}_{obs}$ | $(\tilde{\nu}_{obs} - \tilde{\nu}_{cal})$ |
|------|--------|--------|-------|---------|---------|---------------------|-------------------------------------------|
|      |        |        |       |         |         | /cm <sup>-1</sup>   | /cm <sup>-1</sup>                         |
| 49   | 48     | 2      | 50    | 49      | 2       | 611.693610          | -0.000091                                 |
| 51   | 25     | 26     | 52    | 26      | 26      | 611.693610          | 0.000184                                  |
| 51   | 26     | 26     | 52    | 27      | 26      | 611.693610          | 0.000184                                  |
| 51   | 24     | 27     | 52    | 25      | 27      | 611.693610          | 0.000046                                  |
| 51   | 25     | 27     | 52    | 26      | 27      | 611.693610          | 0.000046                                  |
| 51   | 26     | 25     | 52    | 27      | 25      | 611.693610          | -0.000131                                 |
| 51   | 27     | 25     | 52    | 28      | 25      | 611.693610          | -0.000131                                 |
| 49   | 48     | 1      | 50    | 49      | 2       | 611.693610          | -0.000091                                 |
| 49   | 48     | 2      | 50    | 49      | 1       | 611.693610          | -0.000091                                 |
| 50   | 44     | 6      | 51    | 45      | 6       | 611.701430          | -0.000082                                 |
| 50   | 44     | 7      | 51    | 45      | 7       | 611.701430          | -0.000081                                 |
| 50   | 44     | 6      | 51    | 45      | 7       | 611.701430          | -0.000083                                 |
| 50   | 44     | 7      | 51    | 45      | 6       | 611.701430          | -0.000080                                 |
| 49   | 47     | 3      | 50    | 48      | 3       | 611.741330          | -0.000218                                 |
| 49   | 47     | 3      | 50    | 48      | 2       | 611.741330          | -0.000218                                 |
| 49   | 47     | 2      | 50    | 48      | 3       | 611.741330          | -0.000218                                 |
| 50   | 43     | 7      | 51    | 44      | 7       | 611.751630          | 0.000086                                  |
| 50   | 43     | 8      | 51    | 44      | 8       | 611.751630          | 0.000102                                  |
| 50   | 43     | 7      | 51    | 44      | 8       | 611.751630          | 0.000069                                  |
| 50   | 43     | 8      | 51    | 44      | 7       | 611.751630          | 0.000119                                  |
| 49   | 46     | 3      | 50    | 47      | 3       | 611.789300          | -0.000201                                 |
| 49   | 46     | 4      | 50    | 47      | 4       | 611.789300          | -0.000201                                 |
| 49   | 46     | 3      | 50    | 47      | 4       | 611.789300          | -0.000201                                 |
| 49   | 46     | 4      | 50    | 47      | 3       | 611.789300          | -0.000201                                 |
| 49   | 45     | 4      | 50    | 46      | 4       | 611.837470          | -0.000180                                 |
| 49   | 45     | 5      | 50    | 46      | 5       | 611.837470          | -0.000180                                 |
| 49   | 45     | 4      | 50    | 46      | 5       | 611.837470          | -0.000180                                 |
| 49   | 45     | 5      | 50    | 46      | 4       | 611.837470          | -0.000180                                 |
| 49   | 44     | 5      | 50    | 45      | 5       | 611.886100          | -0.000009                                 |
| 49   | 44     | 6      | 50    | 45      | 6       | 611.886100          | -0.000008                                 |
| 49   | 44     | 5      | 50    | 45      | 6       | 611.886100          | -0.000009                                 |
| 49   | 44     | 6      | 50    | 45      | 5       | 611.886100          | -0.000008                                 |
| 50   | 25     | 26     | 51    | 26      | 26      | 611.915500          | 0.000326                                  |
| 50   | 24     | 26     | 51    | 25      | 26      | 611.915500          | 0.000326                                  |
| 50   | 25     | 25     | 51    | 26      | 25      | 611.915500          | 0.000244                                  |
| 50   | 26     | 25     | 51    | 27      | 25      | 611.915500          | 0.000244                                  |
| 50   | 24     | 27     | 51    | 25      | 27      | 611.915500          | -0.000023                                 |
| 50   | 23     | 27     | 51    | 24      | 27      | 611.915500          | -0.000023                                 |
| 48   | 47     | 1      | 49    | 48      | 1       | 611.928370          | -0.000274                                 |
| 48   | 47     | 2      | 49    | 48      | 2       | 611.928370          | -0.000274                                 |
| 48   | 47     | 1      | 49    | 48      | 2       | 611.928370          | -0.000274                                 |
| 48   | 47     | 2      | 49    | 48      | 1       | 611.928370          | -0.000274                                 |
| 49   | 43     | 6      | 50    | 44      | 6       | 611.935970          | 0.000878                                  |
| 49   | 43     | 7      | 50    | 44      | 7       | 611.935970          | 0.000880                                  |
| 49   | 43     | 6      | 50    | 44      | 7       | 611.935970          | 0.000876                                  |
| 49   | 43     | 7      | 50    | 44      | 6       | 611.935970          | 0.000882                                  |

Continuation, see next page

Continuation of Table 28:  $\nu_{22} \leftarrow gs$  of dithiine.

| $J'$ | $K'_a$ | $K'_c$ | $J''$ | $K''_a$ | $K''_c$ | $\tilde{\nu}_{obs}$<br>/cm <sup>-1</sup> | $(\tilde{\nu}_{obs} - \tilde{\nu}_{cal})$<br>/cm <sup>-1</sup> |
|------|--------|--------|-------|---------|---------|------------------------------------------|----------------------------------------------------------------|
| 48   | 46     | 3      | 49    | 47      | 3       | 611.976190                               | 0.000023                                                       |
| 48   | 46     | 3      | 49    | 47      | 2       | 611.976190                               | 0.000023                                                       |
| 48   | 46     | 2      | 49    | 47      | 3       | 611.976190                               | 0.000023                                                       |
| 49   | 42     | 7      | 50    | 43      | 7       | 611.984630                               | -0.000309                                                      |
| 49   | 42     | 8      | 50    | 43      | 8       | 611.984630                               | -0.000281                                                      |
| 49   | 42     | 7      | 50    | 43      | 8       | 611.984630                               | -0.000339                                                      |
| 49   | 42     | 8      | 50    | 43      | 7       | 611.984630                               | -0.000251                                                      |
| 48   | 45     | 3      | 49    | 46      | 3       | 612.024300                               | 0.000492                                                       |
| 48   | 45     | 4      | 49    | 46      | 4       | 612.024300                               | 0.000492                                                       |
| 48   | 45     | 3      | 49    | 46      | 4       | 612.024300                               | 0.000492                                                       |
| 48   | 45     | 4      | 49    | 46      | 3       | 612.024300                               | 0.000492                                                       |
| 48   | 44     | 4      | 49    | 45      | 4       | 612.071490                               | -0.000156                                                      |
| 48   | 44     | 5      | 49    | 45      | 5       | 612.071490                               | -0.000156                                                      |
| 48   | 44     | 4      | 49    | 45      | 5       | 612.071490                               | -0.000156                                                      |
| 48   | 44     | 5      | 49    | 45      | 4       | 612.071490                               | -0.000156                                                      |
| 48   | 43     | 5      | 49    | 44      | 5       | 612.119890                               | 0.000065                                                       |
| 48   | 43     | 6      | 49    | 44      | 6       | 612.119890                               | 0.000065                                                       |
| 48   | 43     | 5      | 49    | 44      | 6       | 612.119890                               | 0.000065                                                       |
| 48   | 43     | 6      | 49    | 44      | 5       | 612.119890                               | 0.000065                                                       |
| 49   | 25     | 25     | 50    | 26      | 25      | 612.137200                               | 0.000274                                                       |
| 49   | 24     | 25     | 50    | 25      | 25      | 612.137200                               | 0.000274                                                       |
| 49   | 23     | 26     | 50    | 24      | 26      | 612.137200                               | 0.000135                                                       |
| 49   | 24     | 26     | 50    | 25      | 26      | 612.137200                               | 0.000135                                                       |
| 49   | 25     | 24     | 50    | 26      | 24      | 612.137200                               | -0.000051                                                      |
| 49   | 26     | 24     | 50    | 27      | 24      | 612.137200                               | -0.000051                                                      |
| 47   | 46     | 1      | 48    | 47      | 1       | 612.163000                               | -0.000439                                                      |
| 47   | 46     | 2      | 48    | 47      | 2       | 612.163000                               | -0.000439                                                      |
| 47   | 46     | 1      | 48    | 47      | 2       | 612.163000                               | -0.000439                                                      |
| 47   | 46     | 2      | 48    | 47      | 1       | 612.163000                               | -0.000439                                                      |
| 48   | 42     | 6      | 49    | 43      | 6       | 612.168640                               | 0.000083                                                       |
| 48   | 42     | 7      | 49    | 43      | 7       | 612.168640                               | 0.000086                                                       |
| 48   | 42     | 6      | 49    | 43      | 7       | 612.168640                               | 0.000079                                                       |
| 48   | 42     | 7      | 49    | 43      | 6       | 612.168640                               | 0.000090                                                       |
| 47   | 45     | 3      | 48    | 46      | 3       | 612.210620                               | -0.000030                                                      |
| 47   | 45     | 3      | 48    | 46      | 2       | 612.210620                               | -0.000030                                                      |
| 47   | 45     | 2      | 48    | 46      | 3       | 612.210620                               | -0.000030                                                      |
| 48   | 41     | 7      | 49    | 42      | 7       | 612.218270                               | 0.000025                                                       |
| 48   | 41     | 8      | 49    | 42      | 8       | 612.218270                               | 0.000074                                                       |
| 48   | 41     | 7      | 49    | 42      | 8       | 612.218270                               | -0.000028                                                      |
| 48   | 41     | 8      | 49    | 42      | 7       | 612.218270                               | 0.000127                                                       |
| 47   | 43     | 4      | 48    | 44      | 4       | 612.305470                               | -0.000047                                                      |
| 47   | 43     | 5      | 48    | 44      | 5       | 612.305470                               | -0.000047                                                      |
| 47   | 43     | 4      | 48    | 44      | 5       | 612.305470                               | -0.000047                                                      |
| 47   | 43     | 5      | 48    | 44      | 4       | 612.305470                               | -0.000047                                                      |
| 47   | 42     | 5      | 48    | 43      | 5       | 612.353280                               | -0.000139                                                      |
| 47   | 42     | 6      | 48    | 43      | 6       | 612.353280                               | -0.000139                                                      |

Continuation, see next page

Continuation of Table 28:  $\nu_{22} \leftarrow gs$  of dithiine.

| $J'$ | $K'_a$ | $K'_c$ | $J''$ | $K''_a$ | $K''_c$ | $\tilde{\nu}_{obs}$<br>/cm <sup>-1</sup> | $(\tilde{\nu}_{obs} - \tilde{\nu}_{cal})$<br>/cm <sup>-1</sup> |
|------|--------|--------|-------|---------|---------|------------------------------------------|----------------------------------------------------------------|
| 47   | 42     | 5      | 48    | 43      | 6       | 612.353280                               | -0.000139                                                      |
| 47   | 42     | 6      | 48    | 43      | 5       | 612.353280                               | -0.000138                                                      |
| 48   | 23     | 25     | 49    | 24      | 25      | 612.358590                               | -0.000136                                                      |
| 48   | 24     | 25     | 49    | 25      | 25      | 612.358590                               | -0.000136                                                      |
| 48   | 24     | 24     | 49    | 25      | 24      | 612.358590                               | -0.000225                                                      |
| 48   | 25     | 24     | 49    | 26      | 24      | 612.358590                               | -0.000225                                                      |
| 46   | 45     | 1      | 47    | 46      | 1       | 612.397830                               | -0.000230                                                      |
| 46   | 45     | 2      | 47    | 46      | 2       | 612.397830                               | -0.000230                                                      |
| 46   | 45     | 1      | 47    | 46      | 2       | 612.397830                               | -0.000230                                                      |
| 46   | 45     | 2      | 47    | 46      | 1       | 612.397830                               | -0.000230                                                      |
| 47   | 41     | 6      | 48    | 42      | 6       | 612.401910                               | -0.000012                                                      |
| 47   | 41     | 7      | 48    | 42      | 7       | 612.401910                               | -0.000006                                                      |
| 47   | 41     | 6      | 48    | 42      | 7       | 612.401910                               | -0.000018                                                      |
| 47   | 41     | 7      | 48    | 42      | 6       | 612.401910                               | 0.000000                                                       |
| 46   | 44     | 3      | 47    | 45      | 3       | 612.444610                               | -0.000361                                                      |
| 46   | 44     | 3      | 47    | 45      | 2       | 612.444610                               | -0.000361                                                      |
| 46   | 44     | 2      | 47    | 45      | 3       | 612.444610                               | -0.000361                                                      |
| 47   | 40     | 7      | 48    | 41      | 7       | 612.451340                               | -0.000135                                                      |
| 47   | 40     | 8      | 48    | 41      | 8       | 612.451340                               | -0.000051                                                      |
| 47   | 40     | 7      | 48    | 41      | 8       | 612.451340                               | -0.000229                                                      |
| 47   | 40     | 8      | 48    | 41      | 7       | 612.451340                               | 0.000043                                                       |
| 46   | 43     | 3      | 47    | 44      | 3       | 612.491870                               | -0.000122                                                      |
| 46   | 43     | 4      | 47    | 44      | 4       | 612.491870                               | -0.000122                                                      |
| 46   | 43     | 3      | 47    | 44      | 4       | 612.491870                               | -0.000122                                                      |
| 46   | 43     | 4      | 47    | 44      | 3       | 612.491870                               | -0.000122                                                      |
| 46   | 42     | 4      | 47    | 43      | 4       | 612.539270                               | 0.000030                                                       |
| 46   | 42     | 5      | 47    | 43      | 5       | 612.539270                               | 0.000030                                                       |
| 46   | 42     | 4      | 47    | 43      | 5       | 612.539270                               | 0.000030                                                       |
| 46   | 42     | 5      | 47    | 43      | 4       | 612.539270                               | 0.000030                                                       |
| 47   | 23     | 24     | 48    | 24      | 24      | 612.580830                               | 0.000313                                                       |
| 47   | 24     | 24     | 48    | 25      | 24      | 612.580830                               | 0.000313                                                       |
| 47   | 22     | 25     | 48    | 23      | 25      | 612.580830                               | 0.000177                                                       |
| 47   | 23     | 25     | 48    | 24      | 25      | 612.580830                               | 0.000177                                                       |
| 47   | 25     | 23     | 48    | 26      | 23      | 612.580830                               | -0.000028                                                      |
| 47   | 24     | 23     | 48    | 25      | 23      | 612.580830                               | -0.000028                                                      |
| 45   | 45     | 0      | 46    | 46      | 0       | 612.585450                               | -0.000526                                                      |
| 45   | 45     | 1      | 46    | 46      | 1       | 612.585450                               | -0.000526                                                      |
| 45   | 45     | 0      | 46    | 46      | 1       | 612.585450                               | -0.000526                                                      |
| 45   | 45     | 1      | 46    | 46      | 0       | 612.585450                               | -0.000526                                                      |
| 46   | 41     | 5      | 47    | 42      | 5       | 612.586710                               | -0.000173                                                      |
| 46   | 41     | 6      | 47    | 42      | 6       | 612.586710                               | -0.000172                                                      |
| 46   | 41     | 5      | 47    | 42      | 6       | 612.586710                               | -0.000174                                                      |
| 46   | 41     | 6      | 47    | 42      | 5       | 612.586710                               | -0.000172                                                      |
| 45   | 44     | 1      | 46    | 45      | 1       | 612.632330                               | -0.000197                                                      |
| 45   | 44     | 2      | 46    | 45      | 2       | 612.632330                               | -0.000197                                                      |
| 45   | 44     | 1      | 46    | 45      | 2       | 612.632330                               | -0.000197                                                      |

Continuation, see next page

Continuation of Table 28:  $\nu_{22} \leftarrow gs$  of dithiine.

| $J'$ | $K'_a$ | $K'_c$ | $J''$ | $K''_a$ | $K''_c$ | $\tilde{\nu}_{obs}$<br>/cm <sup>-1</sup> | $(\tilde{\nu}_{obs} - \tilde{\nu}_{cal})$<br>/cm <sup>-1</sup> |
|------|--------|--------|-------|---------|---------|------------------------------------------|----------------------------------------------------------------|
| 45   | 44     | 2      | 46    | 45      | 1       | 612.632330                               | -0.000197                                                      |
| 46   | 40     | 6      | 47    | 41      | 6       | 612.634490                               | -0.000676                                                      |
| 46   | 40     | 7      | 47    | 41      | 7       | 612.634490                               | -0.000665                                                      |
| 46   | 40     | 6      | 47    | 41      | 7       | 612.634490                               | -0.000687                                                      |
| 46   | 40     | 7      | 47    | 41      | 6       | 612.634490                               | -0.000653                                                      |
| 45   | 43     | 3      | 46    | 44      | 3       | 612.679230                               | 0.000105                                                       |
| 45   | 43     | 3      | 46    | 44      | 2       | 612.679230                               | 0.000105                                                       |
| 45   | 43     | 2      | 46    | 44      | 3       | 612.679230                               | 0.000105                                                       |
| 46   | 39     | 7      | 47    | 40      | 7       | 612.684330                               | -0.000310                                                      |
| 46   | 39     | 8      | 47    | 40      | 8       | 612.684330                               | -0.000165                                                      |
| 46   | 39     | 7      | 47    | 40      | 8       | 612.684330                               | -0.000475                                                      |
| 46   | 39     | 8      | 47    | 40      | 7       | 612.684330                               | 0.000000                                                       |
| 45   | 42     | 3      | 46    | 43      | 3       | 612.725140                               | -0.000715                                                      |
| 45   | 42     | 4      | 46    | 43      | 4       | 612.725140                               | -0.000715                                                      |
| 45   | 42     | 3      | 46    | 43      | 4       | 612.725140                               | -0.000715                                                      |
| 45   | 42     | 4      | 46    | 43      | 3       | 612.725140                               | -0.000715                                                      |
| 45   | 41     | 4      | 46    | 42      | 4       | 612.772610                               | -0.000218                                                      |
| 45   | 41     | 5      | 46    | 42      | 5       | 612.772610                               | -0.000218                                                      |
| 45   | 41     | 4      | 46    | 42      | 5       | 612.772610                               | -0.000218                                                      |
| 45   | 41     | 5      | 46    | 42      | 4       | 612.772610                               | -0.000218                                                      |
| 46   | 22     | 24     | 47    | 23      | 24      | 612.802650                               | 0.000311                                                       |
| 46   | 23     | 23     | 47    | 24      | 23      | 612.802650                               | 0.000209                                                       |
| 46   | 24     | 23     | 47    | 25      | 23      | 612.802650                               | 0.000209                                                       |
| 46   | 21     | 25     | 47    | 22      | 25      | 612.802650                               | -0.000041                                                      |
| 46   | 22     | 25     | 47    | 23      | 25      | 612.802650                               | -0.000041                                                      |
| 44   | 44     | 0      | 45    | 45      | 0       | 612.820270                               | -0.000287                                                      |
| 44   | 44     | 1      | 45    | 45      | 1       | 612.820270                               | -0.000287                                                      |
| 45   | 40     | 5      | 46    | 41      | 5       | 612.820270                               | 0.000060                                                       |
| 45   | 40     | 6      | 46    | 41      | 6       | 612.820270                               | 0.000061                                                       |
| 44   | 44     | 0      | 45    | 45      | 1       | 612.820270                               | -0.000287                                                      |
| 44   | 44     | 1      | 45    | 45      | 0       | 612.820270                               | -0.000287                                                      |
| 45   | 40     | 5      | 46    | 41      | 6       | 612.820270                               | 0.000058                                                       |
| 45   | 40     | 6      | 46    | 41      | 5       | 612.820270                               | 0.000062                                                       |
| 44   | 43     | 1      | 45    | 44      | 1       | 612.866750                               | -0.000061                                                      |
| 44   | 43     | 2      | 45    | 44      | 2       | 612.866750                               | -0.000061                                                      |
| 44   | 43     | 1      | 45    | 44      | 2       | 612.866750                               | -0.000061                                                      |
| 44   | 43     | 2      | 45    | 44      | 1       | 612.866750                               | -0.000061                                                      |
| 45   | 39     | 6      | 46    | 40      | 6       | 612.868260                               | -0.000049                                                      |
| 45   | 39     | 7      | 46    | 40      | 7       | 612.868260                               | -0.000029                                                      |
| 45   | 39     | 6      | 46    | 40      | 7       | 612.868260                               | -0.000070                                                      |
| 45   | 39     | 7      | 46    | 40      | 6       | 612.868260                               | -0.000008                                                      |
| 44   | 42     | 3      | 45    | 43      | 3       | 612.913190                               | 0.000063                                                       |
| 44   | 42     | 3      | 45    | 43      | 2       | 612.913190                               | 0.000063                                                       |
| 44   | 42     | 2      | 45    | 43      | 3       | 612.913190                               | 0.000063                                                       |
| 45   | 38     | 7      | 46    | 39      | 7       | 612.917720                               | -0.000019                                                      |
| 45   | 38     | 8      | 46    | 39      | 8       | 612.917720                               | 0.000226                                                       |

Continuation, see next page

Continuation of Table 28:  $\nu_{22} \leftarrow gs$  of dithiine.

| $J'$ | $K'_a$ | $K'_c$ | $J''$ | $K''_a$ | $K''_c$ | $\tilde{\nu}_{obs}$<br>/cm <sup>-1</sup> | $(\tilde{\nu}_{obs} - \tilde{\nu}_{cal})$<br>/cm <sup>-1</sup> |
|------|--------|--------|-------|---------|---------|------------------------------------------|----------------------------------------------------------------|
| 45   | 38     | 7      | 46    | 39      | 8       | 612.917720                               | -0.000306                                                      |
| 45   | 38     | 8      | 46    | 39      | 7       | 612.917720                               | 0.000514                                                       |
| 44   | 41     | 3      | 45    | 42      | 3       | 612.959490                               | -0.000080                                                      |
| 44   | 41     | 4      | 45    | 42      | 4       | 612.959490                               | -0.000080                                                      |
| 44   | 41     | 3      | 45    | 42      | 4       | 612.959490                               | -0.000080                                                      |
| 44   | 41     | 4      | 45    | 42      | 3       | 612.959490                               | -0.000080                                                      |
| 44   | 40     | 4      | 45    | 41      | 4       | 613.006130                               | -0.000135                                                      |
| 44   | 40     | 5      | 45    | 41      | 5       | 613.006130                               | -0.000135                                                      |
| 44   | 40     | 4      | 45    | 41      | 5       | 613.006130                               | -0.000135                                                      |
| 44   | 40     | 5      | 45    | 41      | 4       | 613.006130                               | -0.000135                                                      |
| 45   | 29     | 17     | 46    | 30      | 17      | 613.037750                               | 0.000024                                                       |
| 44   | 39     | 5      | 45    | 40      | 5       | 613.053580                               | 0.000166                                                       |
| 44   | 39     | 6      | 45    | 40      | 6       | 613.053580                               | 0.000168                                                       |
| 44   | 39     | 5      | 45    | 40      | 6       | 613.053580                               | 0.000164                                                       |
| 44   | 39     | 6      | 45    | 40      | 5       | 613.053580                               | 0.000170                                                       |
| 43   | 42     | 1      | 44    | 43      | 1       | 613.101340                               | 0.000417                                                       |
| 43   | 42     | 2      | 44    | 43      | 2       | 613.101340                               | 0.000417                                                       |
| 44   | 38     | 6      | 45    | 39      | 6       | 613.101340                               | 0.000006                                                       |
| 44   | 38     | 7      | 45    | 39      | 7       | 613.101340                               | 0.000040                                                       |
| 43   | 42     | 1      | 44    | 43      | 2       | 613.101340                               | 0.000417                                                       |
| 43   | 42     | 2      | 44    | 43      | 1       | 613.101340                               | 0.000417                                                       |
| 44   | 38     | 6      | 45    | 39      | 7       | 613.101340                               | -0.000032                                                      |
| 44   | 38     | 7      | 45    | 39      | 6       | 613.101340                               | 0.000078                                                       |
| 43   | 41     | 3      | 44    | 42      | 3       | 613.146790                               | -0.000161                                                      |
| 43   | 41     | 3      | 44    | 42      | 2       | 613.146790                               | -0.000161                                                      |
| 43   | 41     | 2      | 44    | 42      | 3       | 613.146790                               | -0.000161                                                      |
| 44   | 37     | 7      | 45    | 38      | 7       | 613.150460                               | -0.000349                                                      |
| 44   | 37     | 8      | 45    | 38      | 8       | 613.150460                               | 0.000063                                                       |
| 43   | 40     | 3      | 44    | 41      | 3       | 613.193120                               | -0.000003                                                      |
| 43   | 40     | 4      | 44    | 41      | 4       | 613.193120                               | -0.000003                                                      |
| 43   | 40     | 3      | 44    | 41      | 4       | 613.193120                               | -0.000003                                                      |
| 43   | 40     | 4      | 44    | 41      | 3       | 613.193120                               | -0.000003                                                      |
| 43   | 39     | 4      | 44    | 40      | 4       | 613.239520                               | -0.000038                                                      |
| 43   | 39     | 5      | 44    | 40      | 5       | 613.239520                               | -0.000038                                                      |
| 43   | 39     | 4      | 44    | 40      | 5       | 613.239520                               | -0.000039                                                      |
| 43   | 39     | 5      | 44    | 40      | 4       | 613.239520                               | -0.000038                                                      |
| 44   | 22     | 23     | 45    | 23      | 23      | 613.245950                               | -0.000024                                                      |
| 44   | 21     | 23     | 45    | 22      | 23      | 613.245950                               | -0.000024                                                      |
| 44   | 23     | 22     | 45    | 24      | 22      | 613.245950                               | -0.000145                                                      |
| 44   | 22     | 22     | 45    | 23      | 22      | 613.245950                               | -0.000145                                                      |
| 44   | 21     | 24     | 45    | 22      | 24      | 613.245950                               | -0.000369                                                      |
| 44   | 20     | 24     | 45    | 21      | 24      | 613.245950                               | -0.000369                                                      |
| 44   | 28     | 17     | 45    | 29      | 17      | 613.257100                               | -0.000198                                                      |
| 43   | 38     | 5      | 44    | 39      | 5       | 613.287030                               | 0.000557                                                       |
| 43   | 38     | 6      | 44    | 39      | 6       | 613.287030                               | 0.000560                                                       |
| 43   | 38     | 5      | 44    | 39      | 6       | 613.287030                               | 0.000552                                                       |

Continuation, see next page

Continuation of Table 28:  $\nu_{22} \leftarrow gs$  of dithiine.

| $J'$ | $K'_a$ | $K'_c$ | $J''$ | $K''_a$ | $K''_c$ | $\tilde{\nu}_{obs}$<br>/cm <sup>-1</sup> | $(\tilde{\nu}_{obs} - \tilde{\nu}_{cal})$<br>/cm <sup>-1</sup> |
|------|--------|--------|-------|---------|---------|------------------------------------------|----------------------------------------------------------------|
| 43   | 38     | 6      | 44    | 39      | 5       | 613.287030                               | 0.000565                                                       |
| 42   | 42     | 0      | 43    | 43      | 0       | 613.289070                               | -0.000093                                                      |
| 42   | 42     | 1      | 43    | 43      | 1       | 613.289070                               | -0.000093                                                      |
| 42   | 42     | 0      | 43    | 43      | 1       | 613.289070                               | -0.000093                                                      |
| 42   | 42     | 1      | 43    | 43      | 0       | 613.289070                               | -0.000093                                                      |
| 42   | 41     | 1      | 43    | 42      | 1       | 613.334540                               | -0.000319                                                      |
| 42   | 41     | 2      | 43    | 42      | 2       | 613.334540                               | -0.000319                                                      |
| 43   | 37     | 6      | 44    | 38      | 6       | 613.334540                               | 0.000282                                                       |
| 43   | 37     | 7      | 44    | 38      | 7       | 613.334540                               | 0.000342                                                       |
| 42   | 41     | 1      | 43    | 42      | 2       | 613.334540                               | -0.000319                                                      |
| 42   | 41     | 2      | 43    | 42      | 1       | 613.334540                               | -0.000319                                                      |
| 43   | 37     | 6      | 44    | 38      | 7       | 613.334540                               | 0.000215                                                       |
| 43   | 37     | 7      | 44    | 38      | 6       | 613.334540                               | 0.000409                                                       |
| 42   | 40     | 3      | 43    | 41      | 3       | 613.380700                               | 0.000092                                                       |
| 42   | 40     | 3      | 43    | 41      | 2       | 613.380700                               | 0.000092                                                       |
| 42   | 40     | 2      | 43    | 41      | 3       | 613.380700                               | 0.000092                                                       |
| 43   | 36     | 7      | 44    | 37      | 7       | 613.383500                               | -0.000364                                                      |
| 43   | 36     | 8      | 44    | 37      | 8       | 613.383500                               | 0.000321                                                       |
| 42   | 39     | 3      | 43    | 40      | 3       | 613.426390                               | -0.000117                                                      |
| 42   | 39     | 4      | 43    | 40      | 4       | 613.426390                               | -0.000117                                                      |
| 42   | 39     | 3      | 43    | 40      | 4       | 613.426390                               | -0.000117                                                      |
| 42   | 39     | 4      | 43    | 40      | 3       | 613.426390                               | -0.000117                                                      |
| 43   | 21     | 22     | 44    | 22      | 22      | 613.467670                               | -0.000111                                                      |
| 43   | 22     | 22     | 44    | 23      | 22      | 613.467670                               | -0.000111                                                      |
| 43   | 20     | 23     | 44    | 21      | 23      | 613.467670                               | -0.000223                                                      |
| 43   | 21     | 23     | 44    | 22      | 23      | 613.467670                               | -0.000223                                                      |
| 42   | 38     | 4      | 43    | 39      | 4       | 613.473250                               | 0.000560                                                       |
| 42   | 38     | 5      | 43    | 39      | 5       | 613.473250                               | 0.000560                                                       |
| 42   | 38     | 4      | 43    | 39      | 5       | 613.473250                               | 0.000559                                                       |
| 42   | 38     | 5      | 43    | 39      | 4       | 613.473250                               | 0.000560                                                       |
| 43   | 27     | 17     | 44    | 28      | 17      | 613.476710                               | -0.000400                                                      |
| 42   | 37     | 5      | 43    | 38      | 5       | 613.519100                               | -0.000294                                                      |
| 42   | 37     | 6      | 43    | 38      | 6       | 613.519100                               | -0.000287                                                      |
| 42   | 37     | 5      | 43    | 38      | 6       | 613.519100                               | -0.000302                                                      |
| 42   | 37     | 6      | 43    | 38      | 5       | 613.519100                               | -0.000280                                                      |
| 41   | 41     | 0      | 42    | 42      | 0       | 613.523120                               | -0.000064                                                      |
| 41   | 41     | 1      | 42    | 42      | 1       | 613.523120                               | -0.000064                                                      |
| 41   | 41     | 0      | 42    | 42      | 1       | 613.523120                               | -0.000064                                                      |
| 41   | 41     | 1      | 42    | 42      | 0       | 613.523120                               | -0.000064                                                      |
| 41   | 40     | 1      | 42    | 41      | 1       | 613.568350                               | -0.000257                                                      |
| 41   | 40     | 2      | 42    | 41      | 2       | 613.568350                               | -0.000257                                                      |
| 41   | 40     | 1      | 42    | 41      | 2       | 613.568350                               | -0.000257                                                      |
| 41   | 40     | 2      | 42    | 41      | 1       | 613.568350                               | -0.000257                                                      |
| 41   | 39     | 3      | 42    | 40      | 3       | 613.614030                               | -0.000048                                                      |
| 41   | 39     | 3      | 42    | 40      | 2       | 613.614030                               | -0.000048                                                      |
| 41   | 39     | 2      | 42    | 40      | 3       | 613.614030                               | -0.000048                                                      |

Continuation, see next page

Continuation of Table 28:  $\nu_{22} \leftarrow gs$  of dithiine.

| $J'$ | $K'_a$ | $K'_c$ | $J''$ | $K''_a$ | $K''_c$ | $\tilde{\nu}_{obs}$<br>/cm <sup>-1</sup> | $(\tilde{\nu}_{obs} - \tilde{\nu}_{cal})$<br>/cm <sup>-1</sup> |
|------|--------|--------|-------|---------|---------|------------------------------------------|----------------------------------------------------------------|
| 42   | 35     | 8      | 43    | 36      | 8       | 613.615870                               | 0.000050                                                       |
| 41   | 38     | 3      | 42    | 39      | 3       | 613.659820                               | 0.000107                                                       |
| 41   | 38     | 4      | 42    | 39      | 4       | 613.659820                               | 0.000107                                                       |
| 41   | 38     | 3      | 42    | 39      | 4       | 613.659820                               | 0.000107                                                       |
| 41   | 38     | 4      | 42    | 39      | 3       | 613.659820                               | 0.000107                                                       |
| 42   | 20     | 22     | 43    | 21      | 22      | 613.689630                               | 0.000066                                                       |
| 42   | 21     | 22     | 43    | 22      | 22      | 613.689630                               | 0.000066                                                       |
| 42   | 22     | 21     | 43    | 23      | 21      | 613.689630                               | -0.000080                                                      |
| 42   | 21     | 21     | 43    | 22      | 21      | 613.689630                               | -0.000080                                                      |
| 42   | 19     | 23     | 43    | 20      | 23      | 613.689630                               | -0.000266                                                      |
| 42   | 20     | 23     | 43    | 21      | 23      | 613.689630                               | -0.000266                                                      |
| 42   | 26     | 17     | 43    | 27      | 17      | 613.696910                               | -0.000234                                                      |
| 41   | 37     | 4      | 42    | 38      | 4       | 613.705590                               | -0.000073                                                      |
| 41   | 37     | 5      | 42    | 38      | 5       | 613.705590                               | -0.000072                                                      |
| 41   | 37     | 4      | 42    | 38      | 5       | 613.705590                               | -0.000074                                                      |
| 41   | 37     | 5      | 42    | 38      | 4       | 613.705590                               | -0.000072                                                      |
| 41   | 36     | 5      | 42    | 37      | 5       | 613.752410                               | 0.000235                                                       |
| 41   | 36     | 6      | 42    | 37      | 6       | 613.752410                               | 0.000248                                                       |
| 41   | 36     | 5      | 42    | 37      | 6       | 613.752410                               | 0.000221                                                       |
| 41   | 36     | 6      | 42    | 37      | 5       | 613.752410                               | 0.000262                                                       |
| 40   | 40     | 0      | 41    | 41      | 0       | 613.756980                               | -0.000022                                                      |
| 40   | 40     | 1      | 41    | 41      | 1       | 613.756980                               | -0.000022                                                      |
| 40   | 40     | 0      | 41    | 41      | 1       | 613.756980                               | -0.000022                                                      |
| 40   | 40     | 1      | 41    | 41      | 0       | 613.756980                               | -0.000022                                                      |
| 41   | 35     | 6      | 42    | 36      | 6       | 613.799610                               | -0.000180                                                      |
| 41   | 35     | 7      | 42    | 36      | 7       | 613.799610                               | 0.000000                                                       |
| 41   | 35     | 6      | 42    | 36      | 7       | 613.799610                               | -0.000391                                                      |
| 41   | 35     | 7      | 42    | 36      | 6       | 613.799610                               | 0.000211                                                       |
| 40   | 39     | 1      | 41    | 40      | 1       | 613.801990                               | -0.000169                                                      |
| 40   | 39     | 2      | 41    | 40      | 2       | 613.801990                               | -0.000169                                                      |
| 40   | 39     | 1      | 41    | 40      | 2       | 613.801990                               | -0.000169                                                      |
| 40   | 39     | 2      | 41    | 40      | 1       | 613.801990                               | -0.000169                                                      |
| 40   | 38     | 3      | 41    | 39      | 3       | 613.847340                               | -0.000036                                                      |
| 40   | 38     | 3      | 41    | 39      | 2       | 613.847340                               | -0.000036                                                      |
| 40   | 38     | 2      | 41    | 39      | 3       | 613.847340                               | -0.000036                                                      |
| 41   | 34     | 8      | 42    | 35      | 8       | 613.848520                               | 0.000223                                                       |
| 40   | 37     | 3      | 41    | 38      | 3       | 613.892510                               | -0.000246                                                      |
| 40   | 37     | 4      | 41    | 38      | 4       | 613.892510                               | -0.000246                                                      |
| 40   | 37     | 3      | 41    | 38      | 4       | 613.892510                               | -0.000246                                                      |
| 40   | 37     | 4      | 41    | 38      | 3       | 613.892510                               | -0.000246                                                      |
| 41   | 21     | 21     | 42    | 22      | 21      | 613.911510                               | 0.000166                                                       |
| 41   | 19     | 22     | 42    | 20      | 22      | 613.911510                               | 0.000076                                                       |
| 41   | 22     | 20     | 42    | 23      | 20      | 613.911510                               | -0.000268                                                      |
| 41   | 18     | 23     | 42    | 19      | 23      | 613.911510                               | -0.000465                                                      |
| 41   | 25     | 17     | 42    | 26      | 17      | 613.917350                               | -0.000013                                                      |
| 40   | 36     | 4      | 41    | 37      | 4       | 613.937960                               | -0.000507                                                      |

Continuation, see next page

Continuation of Table 28:  $\nu_{22} \leftarrow gs$  of dithiine.

| $J'$ | $K'_a$ | $K'_c$ | $J''$ | $K''_a$ | $K''_c$ | $\tilde{\nu}_{obs}$<br>/cm <sup>-1</sup> | $(\tilde{\nu}_{obs} - \tilde{\nu}_{cal})$<br>/cm <sup>-1</sup> |
|------|--------|--------|-------|---------|---------|------------------------------------------|----------------------------------------------------------------|
| 40   | 36     | 5      | 41    | 37      | 5       | 613.937960                               | -0.000505                                                      |
| 40   | 36     | 4      | 41    | 37      | 5       | 613.937960                               | -0.000508                                                      |
| 40   | 36     | 5      | 41    | 37      | 4       | 613.937960                               | -0.000504                                                      |
| 40   | 35     | 5      | 41    | 36      | 5       | 613.984870                               | 0.000060                                                       |
| 40   | 35     | 6      | 41    | 36      | 6       | 613.984870                               | 0.000083                                                       |
| 40   | 35     | 5      | 41    | 36      | 6       | 613.984870                               | 0.000034                                                       |
| 40   | 35     | 6      | 41    | 36      | 5       | 613.984870                               | 0.000108                                                       |
| 39   | 39     | 0      | 40    | 40      | 0       | 613.990740                               | 0.000122                                                       |
| 39   | 39     | 1      | 40    | 40      | 1       | 613.990740                               | 0.000122                                                       |
| 39   | 39     | 0      | 40    | 40      | 1       | 613.990740                               | 0.000122                                                       |
| 39   | 39     | 1      | 40    | 40      | 0       | 613.990740                               | 0.000122                                                       |
| 40   | 34     | 6      | 41    | 35      | 6       | 614.032440                               | 0.000019                                                       |
| 40   | 34     | 7      | 41    | 35      | 7       | 614.032440                               | 0.000325                                                       |
| 40   | 34     | 6      | 41    | 35      | 7       | 614.032440                               | -0.000351                                                      |
| 39   | 38     | 1      | 40    | 39      | 1       | 614.035650                               | 0.000135                                                       |
| 39   | 38     | 2      | 40    | 39      | 2       | 614.035650                               | 0.000135                                                       |
| 39   | 38     | 1      | 40    | 39      | 2       | 614.035650                               | 0.000135                                                       |
| 39   | 38     | 2      | 40    | 39      | 1       | 614.035650                               | 0.000135                                                       |
| 39   | 37     | 3      | 40    | 38      | 3       | 614.080850                               | 0.000381                                                       |
| 39   | 37     | 3      | 40    | 38      | 2       | 614.080850                               | 0.000381                                                       |
| 39   | 37     | 2      | 40    | 38      | 3       | 614.080850                               | 0.000381                                                       |
| 39   | 36     | 3      | 40    | 37      | 3       | 614.125680                               | 0.000070                                                       |
| 39   | 36     | 4      | 40    | 37      | 4       | 614.125680                               | 0.000070                                                       |
| 39   | 36     | 3      | 40    | 37      | 4       | 614.125680                               | 0.000070                                                       |
| 39   | 36     | 4      | 40    | 37      | 3       | 614.125680                               | 0.000070                                                       |
| 40   | 21     | 20     | 41    | 22      | 20      | 614.133790                               | 0.000565                                                       |
| 40   | 19     | 22     | 41    | 20      | 22      | 614.133790                               | 0.000431                                                       |
| 40   | 21     | 19     | 41    | 22      | 19      | 614.133790                               | -0.000194                                                      |
| 40   | 24     | 17     | 41    | 25      | 17      | 614.137640                               | -0.000124                                                      |
| 40   | 26     | 15     | 41    | 27      | 15      | 614.145860                               | -0.000174                                                      |
| 39   | 35     | 4      | 40    | 36      | 4       | 614.170960                               | -0.000146                                                      |
| 39   | 35     | 5      | 40    | 36      | 5       | 614.170960                               | -0.000143                                                      |
| 39   | 35     | 4      | 40    | 36      | 5       | 614.170960                               | -0.000148                                                      |
| 39   | 35     | 5      | 40    | 36      | 4       | 614.170960                               | -0.000141                                                      |
| 39   | 34     | 5      | 40    | 35      | 5       | 614.216890                               | -0.000407                                                      |
| 39   | 34     | 6      | 40    | 35      | 6       | 614.216890                               | -0.000366                                                      |
| 39   | 34     | 5      | 40    | 35      | 6       | 614.216890                               | -0.000453                                                      |
| 39   | 34     | 6      | 40    | 35      | 5       | 614.216890                               | -0.000320                                                      |
| 38   | 38     | 0      | 39    | 39      | 0       | 614.224250                               | 0.000237                                                       |
| 38   | 38     | 1      | 39    | 39      | 1       | 614.224250                               | 0.000237                                                       |
| 38   | 38     | 0      | 39    | 39      | 1       | 614.224250                               | 0.000237                                                       |
| 38   | 38     | 1      | 39    | 39      | 0       | 614.224250                               | 0.000237                                                       |
| 39   | 33     | 6      | 40    | 34      | 6       | 614.265030                               | 0.000030                                                       |
| 39   | 33     | 7      | 40    | 34      | 7       | 614.265030                               | 0.000546                                                       |
| 38   | 37     | 1      | 39    | 38      | 1       | 614.268520                               | -0.000140                                                      |
| 38   | 37     | 2      | 39    | 38      | 2       | 614.268520                               | -0.000140                                                      |

Continuation, see next page

Continuation of Table 28:  $\nu_{22} \leftarrow gs$  of dithiine.

| $J'$ | $K'_a$ | $K'_c$ | $J''$ | $K''_a$ | $K''_c$ | $\tilde{\nu}_{obs}$<br>/cm <sup>-1</sup> | $(\tilde{\nu}_{obs} - \tilde{\nu}_{cal})$<br>/cm <sup>-1</sup> |
|------|--------|--------|-------|---------|---------|------------------------------------------|----------------------------------------------------------------|
| 38   | 37     | 1      | 39    | 38      | 2       | 614.268520                               | -0.000140                                                      |
| 38   | 37     | 2      | 39    | 38      | 1       | 614.268520                               | -0.000140                                                      |
| 38   | 36     | 3      | 39    | 37      | 3       | 614.313230                               | -0.000149                                                      |
| 38   | 36     | 3      | 39    | 37      | 2       | 614.313230                               | -0.000149                                                      |
| 38   | 36     | 2      | 39    | 37      | 3       | 614.313230                               | -0.000149                                                      |
| 39   | 20     | 20     | 40    | 21      | 20      | 614.354870                               | 0.000103                                                       |
| 39   | 19     | 20     | 40    | 20      | 20      | 614.354870                               | 0.000103                                                       |
| 39   | 19     | 21     | 40    | 20      | 21      | 614.354870                               | 0.000042                                                       |
| 39   | 18     | 21     | 40    | 19      | 21      | 614.354870                               | 0.000042                                                       |
| 38   | 35     | 3      | 39    | 36      | 3       | 614.357800                               | -0.000484                                                      |
| 38   | 35     | 4      | 39    | 36      | 4       | 614.357800                               | -0.000484                                                      |
| 39   | 23     | 17     | 40    | 24      | 17      | 614.357800                               | -0.000502                                                      |
| 38   | 35     | 3      | 39    | 36      | 4       | 614.357800                               | -0.000484                                                      |
| 38   | 35     | 4      | 39    | 36      | 3       | 614.357800                               | -0.000484                                                      |
| 39   | 25     | 15     | 40    | 26      | 15      | 614.365630                               | 0.000152                                                       |
| 38   | 34     | 4      | 39    | 35      | 4       | 614.403320                               | -0.000258                                                      |
| 38   | 34     | 5      | 39    | 35      | 5       | 614.403320                               | -0.000254                                                      |
| 38   | 34     | 4      | 39    | 35      | 5       | 614.403320                               | -0.000263                                                      |
| 38   | 34     | 5      | 39    | 35      | 4       | 614.403320                               | -0.000249                                                      |
| 38   | 33     | 5      | 39    | 34      | 5       | 614.449140                               | -0.000510                                                      |
| 38   | 33     | 6      | 39    | 34      | 6       | 614.449140                               | -0.000437                                                      |
| 38   | 33     | 5      | 39    | 34      | 6       | 614.449140                               | -0.000592                                                      |
| 38   | 33     | 6      | 39    | 34      | 5       | 614.449140                               | -0.000355                                                      |
| 37   | 37     | 0      | 38    | 38      | 0       | 614.457460                               | 0.000261                                                       |
| 37   | 37     | 1      | 38    | 38      | 1       | 614.457460                               | 0.000261                                                       |
| 37   | 37     | 0      | 38    | 38      | 1       | 614.457460                               | 0.000261                                                       |
| 37   | 37     | 1      | 38    | 38      | 0       | 614.457460                               | 0.000261                                                       |
| 38   | 32     | 6      | 39    | 33      | 6       | 614.496780                               | -0.000762                                                      |
| 38   | 32     | 7      | 39    | 33      | 7       | 614.496780                               | 0.000100                                                       |
| 37   | 36     | 1      | 38    | 37      | 1       | 614.502290                               | 0.000677                                                       |
| 37   | 36     | 2      | 38    | 37      | 2       | 614.502290                               | 0.000677                                                       |
| 37   | 36     | 1      | 38    | 37      | 2       | 614.502290                               | 0.000677                                                       |
| 37   | 36     | 2      | 38    | 37      | 1       | 614.502290                               | 0.000677                                                       |
| 37   | 35     | 3      | 38    | 36      | 3       | 614.546070                               | -0.000016                                                      |
| 37   | 35     | 3      | 38    | 36      | 2       | 614.546070                               | -0.000016                                                      |
| 37   | 35     | 2      | 38    | 36      | 3       | 614.546070                               | -0.000016                                                      |
| 38   | 19     | 20     | 39    | 20      | 20      | 614.576290                               | -0.000081                                                      |
| 38   | 18     | 20     | 39    | 19      | 20      | 614.576290                               | -0.000081                                                      |
| 38   | 20     | 19     | 39    | 21      | 19      | 614.576290                               | -0.000301                                                      |
| 38   | 19     | 19     | 39    | 20      | 19      | 614.576290                               | -0.000301                                                      |
| 38   | 24     | 15     | 39    | 25      | 15      | 614.585140                               | 0.000004                                                       |
| 37   | 34     | 3      | 38    | 35      | 3       | 614.590680                               | -0.000085                                                      |
| 37   | 34     | 4      | 38    | 35      | 4       | 614.590680                               | -0.000085                                                      |
| 37   | 34     | 3      | 38    | 35      | 4       | 614.590680                               | -0.000086                                                      |
| 37   | 34     | 4      | 38    | 35      | 3       | 614.590680                               | -0.000084                                                      |
| 37   | 33     | 4      | 38    | 34      | 4       | 614.635810                               | -0.000061                                                      |

Continuation, see next page

Continuation of Table 28:  $\nu_{22} \leftarrow gs$  of dithiine.

| $J'$ | $K'_a$ | $K'_c$ | $J''$ | $K''_a$ | $K''_c$ | $\tilde{\nu}_{obs}$<br>/cm <sup>-1</sup> | $(\tilde{\nu}_{obs} - \tilde{\nu}_{cal})$<br>/cm <sup>-1</sup> |
|------|--------|--------|-------|---------|---------|------------------------------------------|----------------------------------------------------------------|
| 37   | 33     | 5      | 38    | 34      | 5       | 614.635810                               | -0.000053                                                      |
| 37   | 33     | 4      | 38    | 34      | 5       | 614.635810                               | -0.000070                                                      |
| 37   | 33     | 5      | 38    | 34      | 4       | 614.635810                               | -0.000045                                                      |
| 37   | 32     | 5      | 38    | 33      | 5       | 614.681460                               | -0.000404                                                      |
| 37   | 32     | 6      | 38    | 33      | 6       | 614.681460                               | -0.000277                                                      |
| 37   | 32     | 5      | 38    | 33      | 6       | 614.681460                               | -0.000552                                                      |
| 37   | 32     | 6      | 38    | 33      | 5       | 614.681460                               | -0.000129                                                      |
| 36   | 36     | 0      | 37    | 37      | 0       | 614.690280                               | 0.000111                                                       |
| 36   | 36     | 1      | 37    | 37      | 1       | 614.690280                               | 0.000111                                                       |
| 36   | 36     | 0      | 37    | 37      | 1       | 614.690280                               | 0.000111                                                       |
| 36   | 36     | 1      | 37    | 37      | 0       | 614.690280                               | 0.000111                                                       |
| 37   | 31     | 7      | 38    | 32      | 7       | 614.728720                               | 0.000034                                                       |
| 36   | 35     | 1      | 37    | 36      | 1       | 614.734430                               | 0.000088                                                       |
| 36   | 35     | 2      | 37    | 36      | 2       | 614.734430                               | 0.000088                                                       |
| 36   | 35     | 1      | 37    | 36      | 2       | 614.734430                               | 0.000088                                                       |
| 36   | 35     | 2      | 37    | 36      | 1       | 614.734430                               | 0.000088                                                       |
| 36   | 34     | 3      | 37    | 35      | 3       | 614.778630                               | 0.000040                                                       |
| 36   | 34     | 3      | 37    | 35      | 2       | 614.778630                               | 0.000040                                                       |
| 36   | 34     | 2      | 37    | 35      | 3       | 614.778630                               | 0.000040                                                       |
| 37   | 20     | 18     | 38    | 21      | 18      | 614.797960                               | -0.000576                                                      |
| 37   | 19     | 19     | 38    | 20      | 19      | 614.797960                               | -0.000039                                                      |
| 37   | 18     | 20     | 38    | 19      | 20      | 614.797960                               | -0.000063                                                      |
| 37   | 17     | 21     | 38    | 18      | 21      | 614.797960                               | -0.000564                                                      |
| 37   | 23     | 15     | 38    | 24      | 15      | 614.804790                               | -0.000181                                                      |
| 36   | 33     | 3      | 37    | 34      | 3       | 614.823230                               | 0.000179                                                       |
| 36   | 33     | 4      | 37    | 34      | 4       | 614.823230                               | 0.000180                                                       |
| 36   | 33     | 3      | 37    | 34      | 4       | 614.823230                               | 0.000179                                                       |
| 36   | 33     | 4      | 37    | 34      | 3       | 614.823230                               | 0.000181                                                       |
| 36   | 32     | 4      | 37    | 33      | 4       | 614.867670                               | -0.000317                                                      |
| 36   | 32     | 5      | 37    | 33      | 5       | 614.867670                               | -0.000302                                                      |
| 36   | 32     | 4      | 37    | 33      | 5       | 614.867670                               | -0.000333                                                      |
| 36   | 32     | 5      | 37    | 33      | 4       | 614.867670                               | -0.000287                                                      |
| 36   | 31     | 5      | 37    | 32      | 5       | 614.913950                               | 0.000003                                                       |
| 36   | 31     | 6      | 37    | 32      | 6       | 614.913950                               | 0.000223                                                       |
| 36   | 31     | 5      | 37    | 32      | 6       | 614.913950                               | -0.000260                                                      |
| 35   | 35     | 0      | 36    | 36      | 0       | 614.923470                               | 0.000562                                                       |
| 35   | 35     | 1      | 36    | 36      | 1       | 614.923470                               | 0.000562                                                       |
| 35   | 35     | 0      | 36    | 36      | 1       | 614.923470                               | 0.000562                                                       |
| 35   | 35     | 1      | 36    | 36      | 0       | 614.923470                               | 0.000562                                                       |
| 36   | 30     | 7      | 37    | 31      | 7       | 614.960420                               | -0.000035                                                      |
| 35   | 34     | 1      | 36    | 35      | 1       | 614.967320                               | 0.000471                                                       |
| 35   | 34     | 2      | 36    | 35      | 2       | 614.967320                               | 0.000471                                                       |
| 35   | 34     | 1      | 36    | 35      | 2       | 614.967320                               | 0.000471                                                       |
| 35   | 34     | 2      | 36    | 35      | 1       | 614.967320                               | 0.000471                                                       |
| 35   | 33     | 3      | 36    | 34      | 3       | 615.010890                               | 0.000013                                                       |
| 35   | 33     | 3      | 36    | 34      | 2       | 615.010890                               | 0.000013                                                       |

Continuation, see next page

Continuation of Table 28:  $\nu_{22} \leftarrow gs$  of dithiine.

| $J'$ | $K'_a$ | $K'_c$ | $J''$ | $K''_a$ | $K''_c$ | $\tilde{\nu}_{obs}$<br>/cm <sup>-1</sup> | $(\tilde{\nu}_{obs} - \tilde{\nu}_{cal})$<br>/cm <sup>-1</sup> |
|------|--------|--------|-------|---------|---------|------------------------------------------|----------------------------------------------------------------|
| 35   | 33     | 2      | 36    | 34      | 3       | 615.010890                               | 0.000013                                                       |
| 36   | 20     | 17     | 37    | 21      | 17      | 615.020280                               | -0.000341                                                      |
| 36   | 16     | 21     | 37    | 17      | 21      | 615.020280                               | -0.000129                                                      |
| 36   | 22     | 15     | 37    | 23      | 15      | 615.024860                               | -0.000109                                                      |
| 35   | 32     | 3      | 36    | 33      | 3       | 615.055280                               | 0.000138                                                       |
| 35   | 32     | 4      | 36    | 33      | 4       | 615.055280                               | 0.000139                                                       |
| 35   | 32     | 3      | 36    | 33      | 4       | 615.055280                               | 0.000136                                                       |
| 35   | 32     | 4      | 36    | 33      | 3       | 615.055280                               | 0.000140                                                       |
| 35   | 31     | 4      | 36    | 32      | 4       | 615.099850                               | -0.000081                                                      |
| 35   | 31     | 5      | 36    | 32      | 5       | 615.099850                               | -0.000055                                                      |
| 35   | 31     | 4      | 36    | 32      | 5       | 615.099850                               | -0.000110                                                      |
| 35   | 31     | 5      | 36    | 32      | 4       | 615.099850                               | -0.000026                                                      |
| 35   | 30     | 5      | 36    | 31      | 5       | 615.145640                               | -0.000275                                                      |
| 35   | 30     | 6      | 36    | 31      | 6       | 615.145640                               | 0.000102                                                       |
| 34   | 34     | 0      | 35    | 35      | 0       | 615.155690                               | 0.000266                                                       |
| 34   | 34     | 1      | 35    | 35      | 1       | 615.155690                               | 0.000266                                                       |
| 34   | 34     | 0      | 35    | 35      | 1       | 615.155690                               | 0.000266                                                       |
| 34   | 34     | 1      | 35    | 35      | 0       | 615.155690                               | 0.000266                                                       |
| 34   | 33     | 1      | 35    | 34      | 1       | 615.199310                               | 0.000170                                                       |
| 34   | 33     | 2      | 35    | 34      | 2       | 615.199310                               | 0.000170                                                       |
| 34   | 33     | 1      | 35    | 34      | 2       | 615.199310                               | 0.000170                                                       |
| 34   | 33     | 2      | 35    | 34      | 1       | 615.199310                               | 0.000170                                                       |
| 35   | 19     | 17     | 36    | 20      | 17      | 615.241100                               | -0.000459                                                      |
| 35   | 18     | 18     | 36    | 19      | 18      | 615.241100                               | 0.000145                                                       |
| 35   | 17     | 19     | 36    | 18      | 19      | 615.241100                               | 0.000164                                                       |
| 35   | 16     | 20     | 36    | 17      | 20      | 615.241100                               | -0.000308                                                      |
| 34   | 32     | 3      | 35    | 33      | 3       | 615.242910                               | -0.000041                                                      |
| 34   | 32     | 3      | 35    | 33      | 2       | 615.242910                               | -0.000041                                                      |
| 34   | 32     | 2      | 35    | 33      | 3       | 615.242910                               | -0.000041                                                      |
| 34   | 31     | 3      | 35    | 32      | 3       | 615.287100                               | 0.000074                                                       |
| 34   | 31     | 4      | 35    | 32      | 4       | 615.287100                               | 0.000077                                                       |
| 34   | 31     | 3      | 35    | 32      | 4       | 615.287100                               | 0.000072                                                       |
| 34   | 31     | 4      | 35    | 32      | 3       | 615.287100                               | 0.000079                                                       |
| 34   | 30     | 4      | 35    | 31      | 4       | 615.331800                               | 0.000115                                                       |
| 34   | 30     | 5      | 35    | 31      | 5       | 615.331800                               | 0.000163                                                       |
| 34   | 30     | 4      | 35    | 31      | 5       | 615.331800                               | 0.000062                                                       |
| 34   | 30     | 5      | 35    | 31      | 4       | 615.331800                               | 0.000216                                                       |
| 34   | 29     | 5      | 35    | 30      | 5       | 615.377840                               | 0.000041                                                       |
| 33   | 33     | 0      | 34    | 34      | 0       | 615.387720                               | 0.000020                                                       |
| 33   | 33     | 1      | 34    | 34      | 1       | 615.387720                               | 0.000020                                                       |
| 33   | 33     | 0      | 34    | 34      | 1       | 615.387720                               | 0.000020                                                       |
| 33   | 33     | 1      | 34    | 34      | 0       | 615.387720                               | 0.000020                                                       |
| 33   | 32     | 1      | 34    | 33      | 1       | 615.431370                               | 0.000161                                                       |
| 33   | 32     | 2      | 34    | 33      | 2       | 615.431370                               | 0.000161                                                       |
| 33   | 32     | 1      | 34    | 33      | 2       | 615.431370                               | 0.000161                                                       |
| 33   | 32     | 2      | 34    | 33      | 1       | 615.431370                               | 0.000161                                                       |

Continuation, see next page

Continuation of Table 28:  $\nu_{22} \leftarrow gs$  of dithiine.

| $J'$ | $K'_a$ | $K'_c$ | $J''$ | $K''_a$ | $K''_c$ | $\tilde{\nu}_{obs}$<br>/cm <sup>-1</sup> | $(\tilde{\nu}_{obs} - \tilde{\nu}_{cal})$<br>/cm <sup>-1</sup> |
|------|--------|--------|-------|---------|---------|------------------------------------------|----------------------------------------------------------------|
| 34   | 18     | 17     | 35    | 19      | 17      | 615.462300                               | -0.000253                                                      |
| 34   | 17     | 18     | 35    | 18      | 18      | 615.462300                               | 0.000075                                                       |
| 34   | 16     | 19     | 35    | 17      | 19      | 615.462300                               | -0.000141                                                      |
| 33   | 31     | 3      | 34    | 32      | 3       | 615.474830                               | 0.000015                                                       |
| 33   | 31     | 3      | 34    | 32      | 2       | 615.474830                               | 0.000015                                                       |
| 33   | 31     | 2      | 34    | 32      | 3       | 615.474830                               | 0.000014                                                       |
| 33   | 30     | 3      | 34    | 31      | 3       | 615.518550                               | -0.000153                                                      |
| 33   | 30     | 4      | 34    | 31      | 4       | 615.518550                               | -0.000148                                                      |
| 33   | 30     | 3      | 34    | 31      | 4       | 615.518550                               | -0.000157                                                      |
| 33   | 30     | 4      | 34    | 31      | 3       | 615.518550                               | -0.000143                                                      |
| 33   | 29     | 4      | 34    | 30      | 4       | 615.563230                               | -0.000040                                                      |
| 33   | 29     | 5      | 34    | 30      | 5       | 615.563230                               | 0.000045                                                       |
| 33   | 29     | 4      | 34    | 30      | 5       | 615.563230                               | -0.000138                                                      |
| 33   | 29     | 5      | 34    | 30      | 4       | 615.563230                               | 0.000142                                                       |
| 33   | 28     | 5      | 34    | 29      | 5       | 615.609420                               | -0.000212                                                      |
| 32   | 32     | 0      | 33    | 33      | 0       | 615.619820                               | 0.000089                                                       |
| 32   | 32     | 1      | 33    | 33      | 1       | 615.619820                               | 0.000089                                                       |
| 32   | 32     | 0      | 33    | 33      | 1       | 615.619820                               | 0.000089                                                       |
| 32   | 32     | 1      | 33    | 33      | 0       | 615.619820                               | 0.000089                                                       |
| 32   | 31     | 1      | 33    | 32      | 1       | 615.663050                               | 0.000020                                                       |
| 32   | 31     | 2      | 33    | 32      | 2       | 615.663050                               | 0.000020                                                       |
| 32   | 31     | 1      | 33    | 32      | 2       | 615.663050                               | 0.000020                                                       |
| 32   | 31     | 2      | 33    | 32      | 1       | 615.663050                               | 0.000020                                                       |
| 33   | 18     | 16     | 34    | 19      | 16      | 615.684050                               | -0.000214                                                      |
| 33   | 17     | 17     | 34    | 18      | 17      | 615.684050                               | 0.000467                                                       |
| 33   | 16     | 18     | 34    | 17      | 18      | 615.684050                               | 0.000537                                                       |
| 33   | 15     | 19     | 34    | 16      | 19      | 615.684050                               | 0.000101                                                       |
| 32   | 30     | 3      | 33    | 31      | 3       | 615.706880                               | 0.000441                                                       |
| 32   | 30     | 3      | 33    | 31      | 2       | 615.706880                               | 0.000442                                                       |
| 32   | 30     | 2      | 33    | 31      | 3       | 615.706880                               | 0.000441                                                       |
| 32   | 29     | 3      | 33    | 30      | 3       | 615.749960                               | -0.000206                                                      |
| 32   | 29     | 4      | 33    | 30      | 4       | 615.749960                               | -0.000198                                                      |
| 32   | 29     | 3      | 33    | 30      | 4       | 615.749960                               | -0.000215                                                      |
| 32   | 29     | 4      | 33    | 30      | 3       | 615.749960                               | -0.000189                                                      |
| 31   | 31     | 0      | 32    | 32      | 0       | 615.851580                               | 0.000068                                                       |
| 31   | 31     | 1      | 32    | 32      | 1       | 615.851580                               | 0.000068                                                       |
| 31   | 31     | 0      | 32    | 32      | 1       | 615.851580                               | 0.000068                                                       |
| 31   | 31     | 1      | 32    | 32      | 0       | 615.851580                               | 0.000068                                                       |
| 31   | 30     | 1      | 32    | 31      | 1       | 615.894270                               | -0.000347                                                      |
| 31   | 30     | 2      | 32    | 31      | 2       | 615.894270                               | -0.000347                                                      |
| 31   | 30     | 1      | 32    | 31      | 2       | 615.894270                               | -0.000347                                                      |
| 31   | 30     | 2      | 32    | 31      | 1       | 615.894270                               | -0.000347                                                      |
| 32   | 17     | 16     | 33    | 18      | 16      | 615.904890                               | -0.000124                                                      |
| 32   | 16     | 17     | 33    | 17      | 17      | 615.904890                               | 0.000271                                                       |
| 32   | 15     | 18     | 33    | 16      | 18      | 615.904890                               | 0.000100                                                       |
| 32   | 14     | 19     | 33    | 15      | 19      | 615.904890                               | -0.000542                                                      |

Continuation, see next page

Continuation of Table 28:  $\nu_{22} \leftarrow gs$  of dithiine.

| $J'$ | $K'_a$ | $K'_c$ | $J''$ | $K''_a$ | $K''_c$ | $\tilde{\nu}_{obs}$<br>/cm <sup>-1</sup> | $(\tilde{\nu}_{obs} - \tilde{\nu}_{cal})$<br>/cm <sup>-1</sup> |
|------|--------|--------|-------|---------|---------|------------------------------------------|----------------------------------------------------------------|
| 31   | 29     | 3      | 32    | 30      | 3       | 615.938070                               | 0.000223                                                       |
| 31   | 29     | 3      | 32    | 30      | 2       | 615.938070                               | 0.000224                                                       |
| 31   | 29     | 2      | 32    | 30      | 3       | 615.938070                               | 0.000222                                                       |
| 31   | 28     | 3      | 32    | 29      | 3       | 615.980800                               | -0.000621                                                      |
| 31   | 28     | 4      | 32    | 29      | 4       | 615.980800                               | -0.000605                                                      |
| 31   | 28     | 3      | 32    | 29      | 4       | 615.980800                               | -0.000638                                                      |
| 31   | 28     | 4      | 32    | 29      | 3       | 615.980800                               | -0.000588                                                      |
| 31   | 27     | 4      | 32    | 28      | 4       | 616.026360                               | 0.000438                                                       |
| 31   | 27     | 5      | 32    | 28      | 5       | 616.026360                               | 0.000700                                                       |
| 30   | 30     | 0      | 31    | 31      | 0       | 616.083120                               | 0.000074                                                       |
| 30   | 30     | 1      | 31    | 31      | 1       | 616.083120                               | 0.000074                                                       |
| 30   | 30     | 0      | 31    | 31      | 1       | 616.083120                               | 0.000074                                                       |
| 30   | 30     | 1      | 31    | 31      | 0       | 616.083120                               | 0.000074                                                       |
| 30   | 29     | 1      | 31    | 30      | 1       | 616.126100                               | 0.000138                                                       |
| 30   | 29     | 2      | 31    | 30      | 2       | 616.126100                               | 0.000139                                                       |
| 31   | 16     | 16     | 32    | 17      | 16      | 616.126100                               | 0.000314                                                       |
| 31   | 15     | 17     | 32    | 16      | 17      | 616.126100                               | 0.000442                                                       |
| 31   | 14     | 18     | 32    | 15      | 18      | 616.126100                               | 0.000047                                                       |
| 30   | 29     | 1      | 31    | 30      | 2       | 616.126100                               | 0.000138                                                       |
| 30   | 29     | 2      | 31    | 30      | 1       | 616.126100                               | 0.000139                                                       |
| 30   | 28     | 3      | 31    | 29      | 3       | 616.169020                               | 0.000010                                                       |
| 30   | 28     | 3      | 31    | 29      | 2       | 616.169020                               | 0.000011                                                       |
| 30   | 28     | 2      | 31    | 29      | 3       | 616.169020                               | 0.000008                                                       |
| 30   | 27     | 3      | 31    | 28      | 3       | 616.212780                               | 0.000321                                                       |
| 30   | 27     | 4      | 31    | 28      | 4       | 616.212780                               | 0.000350                                                       |
| 30   | 27     | 3      | 31    | 28      | 4       | 616.212780                               | 0.000289                                                       |
| 30   | 27     | 4      | 31    | 28      | 3       | 616.212780                               | 0.000382                                                       |
| 29   | 29     | 0      | 30    | 30      | 0       | 616.314760                               | 0.000429                                                       |
| 29   | 29     | 1      | 30    | 30      | 1       | 616.314760                               | 0.000429                                                       |
| 29   | 29     | 0      | 30    | 30      | 1       | 616.314760                               | 0.000429                                                       |
| 29   | 29     | 1      | 30    | 30      | 0       | 616.314760                               | 0.000429                                                       |
| 29   | 28     | 1      | 30    | 29      | 1       | 616.357340                               | 0.000281                                                       |
| 29   | 28     | 2      | 30    | 29      | 2       | 616.357340                               | 0.000281                                                       |
| 29   | 28     | 1      | 30    | 29      | 2       | 616.357340                               | 0.000281                                                       |
| 29   | 28     | 2      | 30    | 29      | 1       | 616.357340                               | 0.000281                                                       |
| 29   | 27     | 3      | 30    | 28      | 3       | 616.400090                               | 0.000148                                                       |
| 29   | 27     | 3      | 30    | 28      | 2       | 616.400090                               | 0.000151                                                       |
| 29   | 27     | 2      | 30    | 28      | 3       | 616.400090                               | 0.000144                                                       |
| 28   | 28     | 0      | 29    | 29      | 0       | 616.545320                               | -0.000023                                                      |
| 28   | 28     | 1      | 29    | 29      | 1       | 616.545320                               | -0.000023                                                      |
| 28   | 28     | 0      | 29    | 29      | 1       | 616.545320                               | -0.000023                                                      |
| 28   | 28     | 1      | 29    | 29      | 0       | 616.545320                               | -0.000023                                                      |
| 28   | 27     | 1      | 29    | 28      | 1       | 616.587990                               | 0.000088                                                       |
| 28   | 27     | 2      | 29    | 28      | 2       | 616.587990                               | 0.000088                                                       |
| 28   | 27     | 1      | 29    | 28      | 2       | 616.587990                               | 0.000088                                                       |
| 28   | 27     | 2      | 29    | 28      | 1       | 616.587990                               | 0.000089                                                       |

Continuation, see next page

Continuation of Table 28:  $\nu_{22} \leftarrow gs$  of dithiine.

| $J'$ | $K'_a$ | $K'_c$ | $J''$ | $K''_a$ | $K''_c$ | $\tilde{\nu}_{obs}$<br>/cm <sup>-1</sup> | $(\tilde{\nu}_{obs} - \tilde{\nu}_{cal})$<br>/cm <sup>-1</sup> |
|------|--------|--------|-------|---------|---------|------------------------------------------|----------------------------------------------------------------|
| 28   | 26     | 3      | 29    | 27      | 3       | 616.629800                               | -0.000823                                                      |
| 28   | 26     | 3      | 29    | 27      | 2       | 616.629800                               | -0.000819                                                      |
| 28   | 26     | 2      | 29    | 27      | 3       | 616.629800                               | -0.000832                                                      |
| 27   | 27     | 0      | 28    | 28      | 0       | 616.775970                               | -0.000130                                                      |
| 27   | 27     | 1      | 28    | 28      | 1       | 616.775970                               | -0.000130                                                      |
| 27   | 27     | 0      | 28    | 28      | 1       | 616.775970                               | -0.000130                                                      |
| 27   | 27     | 1      | 28    | 28      | 0       | 616.775970                               | -0.000130                                                      |
| 27   | 26     | 1      | 28    | 27      | 1       | 616.818420                               | -0.000067                                                      |
| 27   | 26     | 2      | 28    | 27      | 2       | 616.818420                               | -0.000067                                                      |
| 27   | 26     | 1      | 28    | 27      | 2       | 616.818420                               | -0.000067                                                      |
| 27   | 26     | 2      | 28    | 27      | 1       | 616.818420                               | -0.000067                                                      |
| 27   | 25     | 3      | 28    | 26      | 3       | 616.861360                               | 0.000303                                                       |
| 27   | 25     | 3      | 28    | 26      | 2       | 616.861360                               | 0.000312                                                       |
| 27   | 25     | 2      | 28    | 26      | 3       | 616.861360                               | 0.000286                                                       |
| 26   | 26     | 0      | 27    | 27      | 0       | 617.007200                               | 0.000616                                                       |
| 26   | 26     | 1      | 27    | 27      | 1       | 617.007200                               | 0.000616                                                       |
| 26   | 26     | 0      | 27    | 27      | 1       | 617.007200                               | 0.000616                                                       |
| 26   | 26     | 1      | 27    | 27      | 0       | 617.007200                               | 0.000617                                                       |
| 26   | 25     | 1      | 27    | 26      | 1       | 617.048950                               | 0.000144                                                       |
| 26   | 25     | 2      | 27    | 26      | 2       | 617.048950                               | 0.000144                                                       |
| 26   | 25     | 1      | 27    | 26      | 2       | 617.048950                               | 0.000143                                                       |
| 26   | 25     | 2      | 27    | 26      | 1       | 617.048950                               | 0.000145                                                       |
| 26   | 24     | 3      | 27    | 25      | 3       | 617.091770                               | 0.000528                                                       |
| 26   | 24     | 3      | 27    | 25      | 2       | 617.091770                               | 0.000544                                                       |
| 26   | 24     | 2      | 27    | 25      | 3       | 617.091770                               | 0.000495                                                       |
| 25   | 25     | 0      | 26    | 26      | 0       | 617.237130                               | 0.000347                                                       |
| 25   | 25     | 1      | 26    | 26      | 1       | 617.237130                               | 0.000347                                                       |
| 25   | 25     | 0      | 26    | 26      | 1       | 617.237130                               | 0.000347                                                       |
| 25   | 25     | 1      | 26    | 26      | 0       | 617.237130                               | 0.000347                                                       |
| 25   | 24     | 1      | 26    | 25      | 1       | 617.279080                               | 0.000219                                                       |
| 25   | 24     | 2      | 26    | 25      | 2       | 617.279080                               | 0.000219                                                       |
| 25   | 24     | 1      | 26    | 25      | 2       | 617.279080                               | 0.000218                                                       |
| 25   | 24     | 2      | 26    | 25      | 1       | 617.279080                               | 0.000220                                                       |
| 25   | 23     | 3      | 26    | 24      | 3       | 617.321210                               | 0.000050                                                       |
| 25   | 23     | 3      | 26    | 24      | 2       | 617.321210                               | 0.000082                                                       |
| 25   | 23     | 2      | 26    | 24      | 3       | 617.321210                               | -0.000011                                                      |
| 24   | 24     | 0      | 25    | 25      | 0       | 617.466910                               | 0.000193                                                       |
| 24   | 24     | 1      | 25    | 25      | 1       | 617.466910                               | 0.000193                                                       |
| 24   | 24     | 0      | 25    | 25      | 1       | 617.466910                               | 0.000193                                                       |
| 24   | 24     | 1      | 25    | 25      | 0       | 617.466910                               | 0.000193                                                       |
| 24   | 23     | 1      | 25    | 24      | 1       | 617.508660                               | 0.000015                                                       |
| 24   | 23     | 2      | 25    | 24      | 2       | 617.508660                               | 0.000017                                                       |
| 24   | 23     | 1      | 25    | 24      | 2       | 617.508660                               | 0.000013                                                       |
| 24   | 23     | 2      | 25    | 24      | 1       | 617.508660                               | 0.000018                                                       |
| 24   | 22     | 3      | 25    | 23      | 3       | 617.550970                               | 0.000149                                                       |
| 24   | 22     | 3      | 25    | 23      | 2       | 617.550970                               | 0.000209                                                       |

Continuation, see next page

Continuation of Table 28:  $\nu_{22} \leftarrow gs$  of dithiine.

| $J'$ | $K'_a$ | $K'_c$ | $J''$ | $K''_a$ | $K''_c$ | $\tilde{\nu}_{obs}$<br>/cm <sup>-1</sup> | $(\tilde{\nu}_{obs} - \tilde{\nu}_{cal})$<br>/cm <sup>-1</sup> |
|------|--------|--------|-------|---------|---------|------------------------------------------|----------------------------------------------------------------|
| 24   | 22     | 2      | 25    | 23      | 3       | 617.550970                               | 0.000035                                                       |
| 23   | 23     | 0      | 24    | 24      | 0       | 617.696440                               | 0.000077                                                       |
| 23   | 23     | 1      | 24    | 24      | 1       | 617.696440                               | 0.000077                                                       |
| 23   | 23     | 0      | 24    | 24      | 1       | 617.696440                               | 0.000077                                                       |
| 23   | 23     | 1      | 24    | 24      | 0       | 617.696440                               | 0.000077                                                       |
| 23   | 22     | 1      | 24    | 23      | 1       | 617.738090                               | -0.000062                                                      |
| 23   | 22     | 2      | 24    | 23      | 2       | 617.738090                               | -0.000058                                                      |
| 23   | 22     | 1      | 24    | 23      | 2       | 617.738090                               | -0.000065                                                      |
| 23   | 22     | 2      | 24    | 23      | 1       | 617.738090                               | -0.000055                                                      |
| 23   | 21     | 3      | 24    | 22      | 3       | 617.780360                               | 0.000147                                                       |
| 23   | 21     | 3      | 24    | 22      | 2       | 617.780360                               | 0.000259                                                       |
| 23   | 21     | 2      | 24    | 22      | 3       | 617.780360                               | -0.000065                                                      |
| 22   | 22     | 0      | 23    | 23      | 0       | 617.925810                               | 0.000097                                                       |
| 22   | 22     | 1      | 23    | 23      | 1       | 617.925810                               | 0.000097                                                       |
| 22   | 22     | 0      | 23    | 23      | 1       | 617.925810                               | 0.000097                                                       |
| 22   | 22     | 1      | 23    | 23      | 0       | 617.925810                               | 0.000097                                                       |
| 22   | 21     | 1      | 23    | 22      | 1       | 617.967410                               | 0.000034                                                       |
| 22   | 21     | 2      | 23    | 22      | 2       | 617.967410                               | 0.000041                                                       |
| 22   | 21     | 1      | 23    | 22      | 2       | 617.967410                               | 0.000027                                                       |
| 22   | 21     | 2      | 23    | 22      | 1       | 617.967410                               | 0.000048                                                       |
| 22   | 20     | 3      | 23    | 21      | 3       | 618.008870                               | -0.000454                                                      |
| 22   | 20     | 3      | 23    | 21      | 2       | 618.008870                               | -0.000244                                                      |
| 22   | 20     | 2      | 23    | 21      | 3       | 618.008870                               | -0.000844                                                      |
| 21   | 21     | 0      | 22    | 22      | 0       | 618.154840                               | 0.000060                                                       |
| 21   | 21     | 1      | 22    | 22      | 1       | 618.154840                               | 0.000061                                                       |
| 21   | 21     | 0      | 22    | 22      | 1       | 618.154840                               | 0.000060                                                       |
| 21   | 21     | 1      | 22    | 22      | 0       | 618.154840                               | 0.000061                                                       |
| 21   | 20     | 1      | 22    | 21      | 1       | 618.196460                               | 0.000130                                                       |
| 21   | 20     | 2      | 22    | 21      | 2       | 618.196460                               | 0.000143                                                       |
| 21   | 20     | 1      | 22    | 21      | 2       | 618.196460                               | 0.000116                                                       |
| 21   | 20     | 2      | 22    | 21      | 1       | 618.196460                               | 0.000156                                                       |
| 20   | 20     | 0      | 21    | 21      | 0       | 618.383340                               | -0.000212                                                      |
| 20   | 20     | 1      | 21    | 21      | 1       | 618.383340                               | -0.000212                                                      |
| 20   | 20     | 0      | 21    | 21      | 1       | 618.383340                               | -0.000213                                                      |
| 20   | 20     | 1      | 21    | 21      | 0       | 618.383340                               | -0.000211                                                      |
| 20   | 19     | 1      | 21    | 20      | 1       | 618.424960                               | -0.000031                                                      |
| 20   | 19     | 2      | 21    | 20      | 2       | 618.424960                               | -0.000006                                                      |
| 20   | 19     | 1      | 21    | 20      | 2       | 618.424960                               | -0.000057                                                      |
| 20   | 19     | 2      | 21    | 20      | 1       | 618.424960                               | 0.000021                                                       |
| 19   | 19     | 0      | 20    | 20      | 0       | 618.611820                               | -0.000198                                                      |
| 19   | 19     | 1      | 20    | 20      | 1       | 618.611820                               | -0.000197                                                      |
| 19   | 19     | 0      | 20    | 20      | 1       | 618.611820                               | -0.000199                                                      |
| 19   | 19     | 1      | 20    | 20      | 0       | 618.611820                               | -0.000196                                                      |
| 19   | 18     | 1      | 20    | 19      | 1       | 618.653440                               | 0.000073                                                       |
| 19   | 18     | 2      | 20    | 19      | 2       | 618.653440                               | 0.000120                                                       |
| 19   | 18     | 1      | 20    | 19      | 2       | 618.653440                               | 0.000021                                                       |

Continuation, see next page

Continuation of Table 28:  $\nu_{22} \leftarrow gs$  of dithiine.

| $J'$ | $K'_a$ | $K'_c$ | $J''$ | $K''_a$ | $K''_c$ | $\tilde{\nu}_{obs}$<br>/cm <sup>-1</sup> | $(\tilde{\nu}_{obs} - \tilde{\nu}_{cal})$<br>/cm <sup>-1</sup> |
|------|--------|--------|-------|---------|---------|------------------------------------------|----------------------------------------------------------------|
| 19   | 18     | 2      | 20    | 19      | 1       | 618.653440                               | 0.000172                                                       |
| 18   | 17     | 1      | 19    | 18      | 1       | 618.881090                               | -0.000368                                                      |
| 18   | 17     | 2      | 19    | 18      | 2       | 618.881090                               | -0.000277                                                      |
| 18   | 17     | 1      | 19    | 18      | 2       | 618.881090                               | -0.000466                                                      |
| 18   | 17     | 2      | 19    | 18      | 1       | 618.881090                               | -0.000179                                                      |
| 16   | 16     | 0      | 17    | 17      | 0       | 619.295250                               | -0.000340                                                      |
| 16   | 16     | 1      | 17    | 17      | 1       | 619.295250                               | -0.000333                                                      |
| 16   | 16     | 0      | 17    | 17      | 1       | 619.295250                               | -0.000347                                                      |
| 16   | 16     | 1      | 17    | 17      | 0       | 619.295250                               | -0.000325                                                      |
| 15   | 15     | 0      | 16    | 16      | 0       | 619.522710                               | -0.000122                                                      |
| 15   | 15     | 1      | 16    | 16      | 1       | 619.522710                               | -0.000107                                                      |
| 15   | 15     | 0      | 16    | 16      | 1       | 619.522710                               | -0.000137                                                      |
| 15   | 15     | 1      | 16    | 16      | 0       | 619.522710                               | -0.000092                                                      |
| 14   | 14     | 0      | 15    | 15      | 0       | 619.749520                               | -0.000237                                                      |
| 14   | 14     | 1      | 15    | 15      | 1       | 619.749520                               | -0.000207                                                      |
| 14   | 14     | 0      | 15    | 15      | 1       | 619.749520                               | -0.000266                                                      |
| 14   | 14     | 1      | 15    | 15      | 0       | 619.749520                               | -0.000177                                                      |
| 13   | 13     | 0      | 14    | 14      | 0       | 619.976050                               | -0.000320                                                      |
| 13   | 13     | 1      | 14    | 14      | 1       | 619.976050                               | -0.000262                                                      |
| 13   | 13     | 0      | 14    | 14      | 1       | 619.976050                               | -0.000380                                                      |
| 13   | 13     | 1      | 14    | 14      | 0       | 619.976050                               | -0.000203                                                      |
| 14   | 2      | 12     | 13    | 1       | 12      | 626.067840                               | -0.000152                                                      |
| 14   | 3      | 12     | 13    | 2       | 12      | 626.067840                               | -0.000152                                                      |
| 14   | 14     | 0      | 13    | 13      | 0       | 626.144570                               | -0.000463                                                      |
| 14   | 14     | 1      | 13    | 13      | 1       | 626.144570                               | -0.000520                                                      |
| 14   | 14     | 0      | 13    | 13      | 1       | 626.144570                               | -0.000580                                                      |
| 14   | 14     | 1      | 13    | 13      | 0       | 626.144570                               | -0.000403                                                      |
| 15   | 3      | 12     | 14    | 2       | 12      | 626.276640                               | -0.000185                                                      |
| 15   | 4      | 12     | 14    | 3       | 12      | 626.276640                               | -0.000185                                                      |
| 15   | 15     | 0      | 14    | 14      | 0       | 626.361570                               | -0.000284                                                      |
| 15   | 15     | 1      | 14    | 14      | 1       | 626.361570                               | -0.000313                                                      |
| 15   | 15     | 0      | 14    | 14      | 1       | 626.361570                               | -0.000343                                                      |
| 15   | 15     | 1      | 14    | 14      | 0       | 626.361570                               | -0.000254                                                      |
| 16   | 4      | 12     | 15    | 3       | 12      | 626.484650                               | -0.000622                                                      |
| 16   | 5      | 12     | 15    | 4       | 12      | 626.484650                               | -0.000622                                                      |
| 16   | 2      | 14     | 15    | 1       | 14      | 626.490150                               | -0.000130                                                      |
| 16   | 3      | 14     | 15    | 2       | 14      | 626.490150                               | -0.000130                                                      |
| 71   | 31     | 40     | 71    | 30      | 41      | 626.537920                               | -0.000640                                                      |
| 16   | 16     | 0      | 15    | 15      | 0       | 626.577710                               | -0.000628                                                      |
| 16   | 16     | 1      | 15    | 15      | 1       | 626.577710                               | -0.000643                                                      |
| 16   | 16     | 0      | 15    | 15      | 1       | 626.577710                               | -0.000658                                                      |
| 16   | 16     | 1      | 15    | 15      | 0       | 626.577710                               | -0.000613                                                      |
| 17   | 3      | 14     | 16    | 2       | 14      | 626.698590                               | 0.000044                                                       |
| 17   | 4      | 14     | 16    | 3       | 14      | 626.698590                               | 0.000044                                                       |
| 62   | 21     | 41     | 62    | 20      | 42      | 626.745070                               | 0.000070                                                       |
| 17   | 16     | 1      | 16    | 15      | 1       | 626.756370                               | 0.000611                                                       |

Continuation, see next page

Continuation of Table 28:  $\nu_{22} \leftarrow gs$  of dithiine.

| $J'$ | $K'_a$ | $K'_c$ | $J''$ | $K''_a$ | $K''_c$ | $\tilde{\nu}_{obs}$<br>/cm <sup>-1</sup> | $(\tilde{\nu}_{obs} - \tilde{\nu}_{cal})$<br>/cm <sup>-1</sup> |
|------|--------|--------|-------|---------|---------|------------------------------------------|----------------------------------------------------------------|
| 17   | 16     | 2      | 16    | 15      | 2       | 626.756370                               | 0.000307                                                       |
| 17   | 16     | 1      | 16    | 15      | 2       | 626.756370                               | -0.000048                                                      |
| 17   | 16     | 2      | 16    | 15      | 1       | 626.756370                               | 0.000966                                                       |
| 17   | 17     | 0      | 16    | 16      | 0       | 626.794360                               | -0.000135                                                      |
| 17   | 17     | 1      | 16    | 16      | 1       | 626.794360                               | -0.000143                                                      |
| 17   | 17     | 0      | 16    | 16      | 1       | 626.794360                               | -0.000150                                                      |
| 17   | 17     | 1      | 16    | 16      | 0       | 626.794360                               | -0.000128                                                      |
| 18   | 4      | 14     | 17    | 3       | 14      | 626.906340                               | -0.000111                                                      |
| 18   | 5      | 14     | 17    | 4       | 14      | 626.906340                               | -0.000111                                                      |
| 53   | 11     | 42     | 53    | 10      | 43      | 626.952490                               | 0.000550                                                       |
| 18   | 17     | 1      | 17    | 16      | 1       | 626.972000                               | 0.000201                                                       |
| 18   | 17     | 2      | 17    | 16      | 2       | 626.972000                               | 0.000036                                                       |
| 18   | 17     | 1      | 17    | 16      | 2       | 626.972000                               | -0.000152                                                      |
| 18   | 17     | 2      | 17    | 16      | 1       | 626.972000                               | 0.000390                                                       |
| 18   | 18     | 0      | 17    | 17      | 0       | 627.009900                               | -0.000416                                                      |
| 18   | 18     | 1      | 17    | 17      | 1       | 627.009900                               | -0.000419                                                      |
| 18   | 18     | 0      | 17    | 17      | 1       | 627.009900                               | -0.000423                                                      |
| 18   | 18     | 1      | 17    | 17      | 0       | 627.009900                               | -0.000412                                                      |
| 28   | 9      | 20     | 27    | 8       | 19      | 627.101880                               | -0.000066                                                      |
| 19   | 7      | 12     | 18    | 6       | 12      | 627.107680                               | -0.000647                                                      |
| 19   | 8      | 12     | 18    | 7       | 12      | 627.107680                               | -0.000647                                                      |
| 19   | 5      | 14     | 18    | 4       | 14      | 627.113640                               | -0.000368                                                      |
| 19   | 6      | 14     | 18    | 5       | 14      | 627.113640                               | -0.000368                                                      |
| 19   | 17     | 2      | 18    | 16      | 2       | 627.147580                               | 0.000124                                                       |
| 19   | 17     | 3      | 18    | 16      | 3       | 627.147580                               | -0.001560                                                      |
| 31   | 6      | 26     | 30    | 5       | 25      | 627.155090                               | -0.000448                                                      |
| 79   | 32     | 47     | 79    | 31      | 48      | 627.158980                               | -0.000580                                                      |
| 19   | 18     | 1      | 18    | 17      | 1       | 627.186690                               | -0.000796                                                      |
| 19   | 18     | 2      | 18    | 17      | 2       | 627.186690                               | -0.000885                                                      |
| 19   | 18     | 1      | 18    | 17      | 2       | 627.186690                               | -0.000984                                                      |
| 19   | 18     | 2      | 18    | 17      | 1       | 627.186690                               | -0.000697                                                      |
| 19   | 19     | 0      | 18    | 18      | 0       | 627.225650                               | -0.000164                                                      |
| 19   | 19     | 1      | 18    | 18      | 1       | 627.225650                               | -0.000166                                                      |
| 19   | 19     | 0      | 18    | 18      | 1       | 627.225650                               | -0.000168                                                      |
| 19   | 19     | 1      | 18    | 18      | 0       | 627.225650                               | -0.000162                                                      |
| 29   | 10     | 20     | 28    | 9       | 19      | 627.308210                               | 0.000321                                                       |
| 20   | 8      | 12     | 19    | 7       | 12      | 627.315070                               | -0.000194                                                      |
| 20   | 9      | 12     | 19    | 8       | 12      | 627.315070                               | -0.000194                                                      |
| 20   | 6      | 14     | 19    | 5       | 14      | 627.320620                               | -0.000602                                                      |
| 20   | 7      | 14     | 19    | 6       | 14      | 627.320620                               | -0.000602                                                      |
| 20   | 6      | 15     | 19    | 5       | 15      | 627.324160                               | 0.000040                                                       |
| 20   | 5      | 15     | 19    | 4       | 15      | 627.324160                               | 0.000040                                                       |
| 32   | 7      | 26     | 31    | 6       | 25      | 627.360350                               | -0.000332                                                      |
| 79   | 30     | 49     | 79    | 29      | 50      | 627.364980                               | -0.000217                                                      |
| 20   | 19     | 1      | 19    | 18      | 1       | 627.402940                               | 0.000124                                                       |
| 20   | 19     | 2      | 19    | 18      | 2       | 627.402940                               | 0.000077                                                       |

Continuation, see next page

Continuation of Table 28:  $\nu_{22} \leftarrow gs$  of dithiine.

| $J'$ | $K'_a$ | $K'_c$ | $J''$ | $K''_a$ | $K''_c$ | $\tilde{\nu}_{obs}$<br>/cm <sup>-1</sup> | $(\tilde{\nu}_{obs} - \tilde{\nu}_{cat})$<br>/cm <sup>-1</sup> |
|------|--------|--------|-------|---------|---------|------------------------------------------|----------------------------------------------------------------|
| 20   | 19     | 1      | 19    | 18      | 2       | 627.402940                               | 0.000025                                                       |
| 20   | 19     | 2      | 19    | 18      | 1       | 627.402940                               | 0.000176                                                       |
| 20   | 20     | 0      | 19    | 19      | 0       | 627.440490                               | -0.000500                                                      |
| 20   | 20     | 1      | 19    | 19      | 1       | 627.440490                               | -0.000501                                                      |
| 20   | 20     | 0      | 19    | 19      | 1       | 627.440490                               | -0.000502                                                      |
| 20   | 20     | 1      | 19    | 19      | 0       | 627.440490                               | -0.000499                                                      |
| 30   | 11     | 20     | 29    | 10      | 19      | 627.514150                               | 0.000461                                                       |
| 21   | 9      | 12     | 20    | 8       | 12      | 627.521580                               | -0.000226                                                      |
| 21   | 10     | 12     | 20    | 9       | 12      | 627.521580                               | -0.000226                                                      |
| 21   | 7      | 14     | 20    | 6       | 14      | 627.528150                               | 0.000072                                                       |
| 21   | 8      | 14     | 20    | 7       | 14      | 627.528150                               | 0.000072                                                       |
| 21   | 7      | 15     | 20    | 6       | 15      | 627.530990                               | -0.000097                                                      |
| 21   | 6      | 15     | 20    | 5       | 15      | 627.530990                               | -0.000097                                                      |
| 33   | 8      | 26     | 32    | 7       | 25      | 627.565150                               | -0.000544                                                      |
| 79   | 29     | 51     | 79    | 28      | 52      | 627.571780                               | 0.000751                                                       |
| 21   | 19     | 2      | 20    | 18      | 2       | 627.579050                               | 0.000163                                                       |
| 21   | 19     | 3      | 20    | 18      | 3       | 627.579050                               | -0.000396                                                      |
| 21   | 20     | 1      | 20    | 19      | 1       | 627.618190                               | 0.000360                                                       |
| 21   | 20     | 2      | 20    | 19      | 2       | 627.618190                               | 0.000336                                                       |
| 21   | 20     | 1      | 20    | 19      | 2       | 627.618190                               | 0.000309                                                       |
| 21   | 20     | 2      | 20    | 19      | 1       | 627.618190                               | 0.000387                                                       |
| 31   | 12     | 20     | 30    | 11      | 19      | 627.719940                               | 0.000583                                                       |
| 22   | 11     | 11     | 21    | 10      | 11      | 627.724200                               | -0.000061                                                      |
| 22   | 12     | 11     | 21    | 11      | 11      | 627.724200                               | -0.000061                                                      |
| 22   | 10     | 12     | 21    | 9       | 12      | 627.728140                               | 0.000149                                                       |
| 22   | 11     | 12     | 21    | 10      | 12      | 627.728140                               | 0.000149                                                       |
| 22   | 8      | 14     | 21    | 7       | 14      | 627.734560                               | -0.000040                                                      |
| 22   | 9      | 14     | 21    | 8       | 14      | 627.734560                               | -0.000040                                                      |
| 22   | 8      | 15     | 21    | 7       | 15      | 627.737910                               | 0.000179                                                       |
| 22   | 7      | 15     | 21    | 6       | 15      | 627.737910                               | 0.000179                                                       |
| 34   | 9      | 26     | 33    | 8       | 25      | 627.770040                               | -0.000531                                                      |
| 22   | 20     | 2      | 21    | 19      | 2       | 627.794420                               | 0.000491                                                       |
| 22   | 20     | 3      | 21    | 19      | 3       | 627.794420                               | 0.000177                                                       |
| 22   | 20     | 2      | 21    | 19      | 3       | 627.794420                               | -0.000213                                                      |
| 22   | 20     | 3      | 21    | 19      | 2       | 627.794420                               | 0.000882                                                       |
| 22   | 21     | 1      | 21    | 20      | 1       | 627.832380                               | -0.000130                                                      |
| 22   | 21     | 2      | 21    | 20      | 2       | 627.832380                               | -0.000143                                                      |
| 22   | 21     | 1      | 21    | 20      | 2       | 627.832380                               | -0.000157                                                      |
| 22   | 21     | 2      | 21    | 20      | 1       | 627.832380                               | -0.000117                                                      |
| 32   | 13     | 20     | 31    | 12      | 19      | 627.925270                               | 0.000355                                                       |
| 23   | 12     | 11     | 22    | 11      | 11      | 627.929690                               | -0.000088                                                      |
| 23   | 13     | 11     | 22    | 12      | 11      | 627.929690                               | -0.000088                                                      |
| 23   | 11     | 12     | 22    | 10      | 12      | 627.933770                               | -0.000020                                                      |
| 23   | 12     | 12     | 22    | 11      | 12      | 627.933770                               | -0.000020                                                      |
| 23   | 9      | 14     | 22    | 8       | 14      | 627.941120                               | 0.000331                                                       |
| 23   | 10     | 14     | 22    | 9       | 14      | 627.941120                               | 0.000331                                                       |

Continuation, see next page

Continuation of Table 28:  $\nu_{22} \leftarrow gs$  of dithiine.

| $J'$ | $K'_a$ | $K'_c$ | $J''$ | $K''_a$ | $K''_c$ | $\tilde{\nu}_{obs}$<br>/cm <sup>-1</sup> | $(\tilde{\nu}_{obs} - \tilde{\nu}_{cal})$<br>/cm <sup>-1</sup> |
|------|--------|--------|-------|---------|---------|------------------------------------------|----------------------------------------------------------------|
| 35   | 10     | 26     | 34    | 9       | 25      | 627.975530                               | 0.000195                                                       |
| 23   | 21     | 2      | 22    | 20      | 2       | 628.008930                               | 0.000344                                                       |
| 23   | 21     | 3      | 22    | 20      | 3       | 628.008930                               | 0.000169                                                       |
| 23   | 21     | 2      | 22    | 20      | 3       | 628.008930                               | -0.000043                                                      |
| 23   | 21     | 3      | 22    | 20      | 2       | 628.008930                               | 0.000556                                                       |
| 23   | 22     | 1      | 22    | 21      | 1       | 628.047460                               | 0.000579                                                       |
| 23   | 22     | 2      | 22    | 21      | 2       | 628.047460                               | 0.000572                                                       |
| 23   | 22     | 1      | 22    | 21      | 2       | 628.047460                               | 0.000565                                                       |
| 23   | 22     | 2      | 22    | 21      | 1       | 628.047460                               | 0.000586                                                       |
| 33   | 14     | 20     | 32    | 13      | 19      | 628.129780                               | -0.000584                                                      |
| 24   | 13     | 11     | 23    | 12      | 11      | 628.134740                               | -0.000147                                                      |
| 24   | 14     | 11     | 23    | 13      | 11      | 628.134740                               | -0.000149                                                      |
| 24   | 10     | 14     | 23    | 9       | 14      | 628.146850                               | 0.000213                                                       |
| 24   | 11     | 14     | 23    | 10      | 14      | 628.146850                               | 0.000213                                                       |
| 24   | 10     | 15     | 23    | 9       | 15      | 628.150150                               | 0.000126                                                       |
| 24   | 9      | 15     | 23    | 8       | 15      | 628.150150                               | 0.000126                                                       |
| 24   | 9      | 16     | 23    | 8       | 16      | 628.153340                               | 0.000013                                                       |
| 24   | 8      | 16     | 23    | 7       | 16      | 628.153340                               | 0.000013                                                       |
| 24   | 8      | 17     | 23    | 7       | 17      | 628.156780                               | 0.000176                                                       |
| 24   | 7      | 17     | 23    | 6       | 17      | 628.156780                               | 0.000176                                                       |
| 24   | 23     | 1      | 23    | 22      | 1       | 628.261240                               | 0.000290                                                       |
| 24   | 23     | 2      | 23    | 22      | 2       | 628.261240                               | 0.000287                                                       |
| 24   | 23     | 1      | 23    | 22      | 2       | 628.261240                               | 0.000283                                                       |
| 24   | 23     | 2      | 23    | 22      | 1       | 628.261240                               | 0.000294                                                       |
| 24   | 24     | 0      | 23    | 23      | 0       | 628.298720                               | 0.000193                                                       |
| 24   | 24     | 1      | 23    | 23      | 1       | 628.298720                               | 0.000193                                                       |
| 24   | 24     | 0      | 23    | 23      | 1       | 628.298720                               | 0.000193                                                       |
| 24   | 24     | 1      | 23    | 23      | 0       | 628.298720                               | 0.000193                                                       |
| 25   | 14     | 11     | 24    | 13      | 11      | 628.339860                               | 0.000267                                                       |
| 25   | 15     | 11     | 24    | 14      | 11      | 628.339860                               | 0.000263                                                       |
| 25   | 11     | 14     | 24    | 10      | 14      | 628.352700                               | 0.000541                                                       |
| 25   | 12     | 14     | 24    | 11      | 14      | 628.352700                               | 0.000541                                                       |
| 25   | 11     | 15     | 24    | 10      | 15      | 628.355920                               | 0.000221                                                       |
| 25   | 10     | 15     | 24    | 9       | 15      | 628.355920                               | 0.000221                                                       |
| 25   | 10     | 16     | 24    | 9       | 16      | 628.359120                               | -0.000005                                                      |
| 25   | 9      | 16     | 24    | 8       | 16      | 628.359120                               | -0.000005                                                      |
| 25   | 9      | 17     | 24    | 8       | 17      | 628.362670                               | 0.000181                                                       |
| 25   | 8      | 17     | 24    | 7       | 17      | 628.362670                               | 0.000181                                                       |
| 25   | 22     | 3      | 24    | 21      | 3       | 628.397900                               | 0.000213                                                       |
| 25   | 22     | 4      | 24    | 21      | 4       | 628.397900                               | -0.000653                                                      |
| 25   | 23     | 2      | 24    | 22      | 2       | 628.436890                               | 0.000005                                                       |
| 25   | 23     | 3      | 24    | 22      | 3       | 628.436890                               | -0.000047                                                      |
| 25   | 23     | 2      | 24    | 22      | 3       | 628.436890                               | -0.000108                                                      |
| 25   | 23     | 3      | 24    | 22      | 2       | 628.436890                               | 0.000066                                                       |
| 25   | 24     | 1      | 24    | 23      | 1       | 628.475230                               | 0.000514                                                       |
| 25   | 24     | 2      | 24    | 23      | 2       | 628.475230                               | 0.000513                                                       |

Continuation, see next page

Continuation of Table 28:  $\nu_{22} \leftarrow gs$  of dithiine.

| $J'$ | $K'_a$ | $K'_c$ | $J''$ | $K''_a$ | $K''_c$ | $\tilde{\nu}_{obs}$<br>/cm <sup>-1</sup> | $(\tilde{\nu}_{obs} - \tilde{\nu}_{cat})$<br>/cm <sup>-1</sup> |
|------|--------|--------|-------|---------|---------|------------------------------------------|----------------------------------------------------------------|
| 25   | 24     | 1      | 24    | 23      | 2       | 628.475230                               | 0.000511                                                       |
| 25   | 24     | 2      | 24    | 23      | 1       | 628.475230                               | 0.000516                                                       |
| 25   | 25     | 0      | 24    | 24      | 0       | 628.512310                               | 0.000170                                                       |
| 25   | 25     | 1      | 24    | 24      | 1       | 628.512310                               | 0.000170                                                       |
| 25   | 25     | 0      | 24    | 24      | 1       | 628.512310                               | 0.000170                                                       |
| 25   | 25     | 1      | 24    | 24      | 0       | 628.512310                               | 0.000170                                                       |
| 26   | 15     | 11     | 25    | 14      | 11      | 628.543820                               | -0.000072                                                      |
| 26   | 16     | 11     | 25    | 15      | 11      | 628.543820                               | -0.000081                                                      |
| 26   | 13     | 13     | 25    | 12      | 13      | 628.553320                               | -0.000056                                                      |
| 26   | 14     | 13     | 25    | 13      | 13      | 628.553320                               | -0.000056                                                      |
| 26   | 12     | 14     | 25    | 11      | 14      | 628.557480                               | 0.000129                                                       |
| 26   | 13     | 14     | 25    | 12      | 14      | 628.557480                               | 0.000129                                                       |
| 26   | 12     | 15     | 25    | 11      | 15      | 628.561220                               | 0.000156                                                       |
| 26   | 11     | 15     | 25    | 10      | 15      | 628.561220                               | 0.000156                                                       |
| 26   | 11     | 16     | 25    | 10      | 16      | 628.564820                               | 0.000207                                                       |
| 26   | 10     | 16     | 25    | 9       | 16      | 628.564820                               | 0.000207                                                       |
| 26   | 10     | 17     | 25    | 9       | 17      | 628.568480                               | 0.000398                                                       |
| 26   | 9      | 17     | 25    | 8       | 17      | 628.568480                               | 0.000398                                                       |
| 26   | 4      | 23     | 25    | 3       | 23      | 628.589040                               | -0.000347                                                      |
| 26   | 3      | 23     | 25    | 2       | 23      | 628.589040                               | -0.000347                                                      |
| 26   | 23     | 3      | 25    | 22      | 3       | 628.612020                               | 0.000154                                                       |
| 26   | 23     | 4      | 25    | 22      | 4       | 628.612020                               | -0.000345                                                      |
| 26   | 24     | 2      | 25    | 23      | 2       | 628.650800                               | 0.000245                                                       |
| 26   | 24     | 3      | 25    | 23      | 3       | 628.650800                               | 0.000217                                                       |
| 26   | 24     | 2      | 25    | 23      | 3       | 628.650800                               | 0.000185                                                       |
| 26   | 24     | 3      | 25    | 23      | 2       | 628.650800                               | 0.000277                                                       |
| 26   | 25     | 1      | 25    | 24      | 1       | 628.688300                               | 0.000132                                                       |
| 26   | 25     | 2      | 25    | 24      | 2       | 628.688300                               | 0.000131                                                       |
| 26   | 25     | 1      | 25    | 24      | 2       | 628.688300                               | 0.000130                                                       |
| 26   | 25     | 2      | 25    | 24      | 1       | 628.688300                               | 0.000133                                                       |
| 26   | 26     | 0      | 25    | 25      | 0       | 628.725520                               | 0.000075                                                       |
| 26   | 26     | 1      | 25    | 25      | 1       | 628.725520                               | 0.000075                                                       |
| 26   | 26     | 0      | 25    | 25      | 1       | 628.725520                               | 0.000075                                                       |
| 26   | 26     | 1      | 25    | 25      | 0       | 628.725520                               | 0.000075                                                       |
| 27   | 16     | 11     | 26    | 15      | 11      | 628.747720                               | -0.000054                                                      |
| 27   | 17     | 11     | 26    | 16      | 11      | 628.747720                               | -0.000074                                                      |
| 27   | 14     | 13     | 26    | 13      | 13      | 628.758160                               | 0.000143                                                       |
| 27   | 15     | 13     | 26    | 14      | 13      | 628.758160                               | 0.000143                                                       |
| 27   | 13     | 14     | 26    | 12      | 14      | 628.762620                               | 0.000392                                                       |
| 27   | 14     | 14     | 26    | 13      | 14      | 628.762620                               | 0.000392                                                       |
| 27   | 13     | 15     | 26    | 12      | 15      | 628.766060                               | -0.000062                                                      |
| 27   | 12     | 15     | 26    | 11      | 15      | 628.766060                               | -0.000062                                                      |
| 27   | 12     | 16     | 26    | 11      | 16      | 628.770020                               | 0.000203                                                       |
| 27   | 11     | 16     | 26    | 10      | 16      | 628.770020                               | 0.000203                                                       |
| 27   | 11     | 17     | 26    | 10      | 17      | 628.773370                               | -0.000022                                                      |
| 27   | 10     | 17     | 26    | 9       | 17      | 628.773370                               | -0.000022                                                      |

Continuation, see next page

Continuation of Table 28:  $\nu_{22} \leftarrow gs$  of dithiine.

| $J'$ | $K'_a$ | $K'_c$ | $J''$ | $K''_a$ | $K''_c$ | $\tilde{\nu}_{obs}$<br>/cm <sup>-1</sup> | $(\tilde{\nu}_{obs} - \tilde{\nu}_{cal})$<br>/cm <sup>-1</sup> |
|------|--------|--------|-------|---------|---------|------------------------------------------|----------------------------------------------------------------|
| 27   | 9      | 19     | 26    | 8       | 19      | 628.780760                               | 0.000314                                                       |
| 27   | 8      | 19     | 26    | 7       | 19      | 628.780760                               | 0.000314                                                       |
| 27   | 5      | 23     | 26    | 4       | 23      | 628.795040                               | 0.000023                                                       |
| 27   | 4      | 23     | 26    | 3       | 23      | 628.795040                               | 0.000023                                                       |
| 27   | 24     | 3      | 26    | 23      | 3       | 628.826080                               | 0.000431                                                       |
| 27   | 24     | 4      | 26    | 23      | 4       | 628.826080                               | 0.000147                                                       |
| 27   | 24     | 3      | 26    | 23      | 4       | 628.826080                               | -0.000224                                                      |
| 27   | 24     | 4      | 26    | 23      | 3       | 628.826080                               | 0.000802                                                       |
| 27   | 25     | 2      | 26    | 24      | 2       | 628.864110                               | 0.000190                                                       |
| 27   | 25     | 3      | 26    | 24      | 3       | 628.864110                               | 0.000176                                                       |
| 27   | 25     | 2      | 26    | 24      | 3       | 628.864110                               | 0.000159                                                       |
| 27   | 25     | 3      | 26    | 24      | 2       | 628.864110                               | 0.000207                                                       |
| 27   | 26     | 1      | 26    | 25      | 1       | 628.901030                               | -0.000314                                                      |
| 27   | 26     | 2      | 26    | 25      | 2       | 628.901030                               | -0.000314                                                      |
| 27   | 26     | 1      | 26    | 25      | 2       | 628.901030                               | -0.000315                                                      |
| 27   | 26     | 2      | 26    | 25      | 1       | 628.901030                               | -0.000313                                                      |
| 27   | 27     | 0      | 26    | 26      | 0       | 628.938360                               | -0.000093                                                      |
| 27   | 27     | 1      | 26    | 26      | 1       | 628.938360                               | -0.000093                                                      |
| 27   | 27     | 0      | 26    | 26      | 1       | 628.938360                               | -0.000093                                                      |
| 27   | 27     | 1      | 26    | 26      | 0       | 628.938360                               | -0.000093                                                      |
| 28   | 17     | 11     | 27    | 16      | 11      | 628.951160                               | -0.000083                                                      |
| 28   | 18     | 11     | 27    | 17      | 11      | 628.951160                               | -0.000126                                                      |
| 28   | 15     | 13     | 27    | 14      | 13      | 628.962370                               | 0.000047                                                       |
| 28   | 16     | 13     | 27    | 15      | 13      | 628.962370                               | 0.000046                                                       |
| 28   | 14     | 15     | 27    | 13      | 15      | 628.971220                               | 0.000346                                                       |
| 28   | 13     | 15     | 27    | 12      | 15      | 628.971220                               | 0.000346                                                       |
| 28   | 13     | 16     | 27    | 12      | 16      | 628.974900                               | 0.000175                                                       |
| 28   | 12     | 16     | 27    | 11      | 16      | 628.974900                               | 0.000175                                                       |
| 28   | 12     | 17     | 27    | 11      | 17      | 628.978630                               | 0.000202                                                       |
| 28   | 11     | 17     | 27    | 10      | 17      | 628.978630                               | 0.000202                                                       |
| 28   | 10     | 19     | 27    | 9       | 19      | 628.985840                               | 0.000182                                                       |
| 28   | 9      | 19     | 27    | 8       | 19      | 628.985840                               | 0.000182                                                       |
| 28   | 6      | 23     | 27    | 5       | 23      | 629.000750                               | 0.000346                                                       |
| 28   | 5      | 23     | 27    | 4       | 23      | 629.000750                               | 0.000346                                                       |
| 28   | 25     | 3      | 27    | 24      | 3       | 629.039350                               | 0.000287                                                       |
| 28   | 25     | 4      | 27    | 24      | 4       | 629.039350                               | 0.000127                                                       |
| 28   | 25     | 3      | 27    | 24      | 4       | 629.039350                               | -0.000077                                                      |
| 28   | 25     | 4      | 27    | 24      | 3       | 629.039350                               | 0.000492                                                       |
| 28   | 26     | 2      | 27    | 25      | 2       | 629.077290                               | 0.000291                                                       |
| 28   | 26     | 3      | 27    | 25      | 3       | 629.077290                               | 0.000283                                                       |
| 28   | 26     | 2      | 27    | 25      | 3       | 629.077290                               | 0.000274                                                       |
| 28   | 26     | 3      | 27    | 25      | 2       | 629.077290                               | 0.000300                                                       |
| 28   | 27     | 1      | 27    | 26      | 1       | 629.114380                               | 0.000170                                                       |
| 28   | 27     | 2      | 27    | 26      | 2       | 629.114380                               | 0.000170                                                       |
| 28   | 27     | 1      | 27    | 26      | 2       | 629.114380                               | 0.000170                                                       |
| 28   | 27     | 2      | 27    | 26      | 1       | 629.114380                               | 0.000171                                                       |

Continuation, see next page

Continuation of Table 28:  $\nu_{22} \leftarrow gs$  of dithiine.

| $J'$ | $K'_a$ | $K'_c$ | $J''$ | $K''_a$ | $K''_c$ | $\tilde{\nu}_{obs}$<br>/cm <sup>-1</sup> | $(\tilde{\nu}_{obs} - \tilde{\nu}_{cal})$<br>/cm <sup>-1</sup> |
|------|--------|--------|-------|---------|---------|------------------------------------------|----------------------------------------------------------------|
| 28   | 28     | 0      | 27    | 27      | 0       | 629.151310                               | 0.000140                                                       |
| 28   | 28     | 1      | 27    | 27      | 1       | 629.151310                               | 0.000140                                                       |
| 28   | 28     | 0      | 27    | 27      | 1       | 629.151310                               | 0.000140                                                       |
| 28   | 28     | 1      | 27    | 27      | 0       | 629.151310                               | 0.000140                                                       |
| 29   | 18     | 11     | 28    | 17      | 11      | 629.154220                               | -0.000058                                                      |
| 29   | 19     | 11     | 28    | 18      | 11      | 629.154220                               | -0.000147                                                      |
| 29   | 16     | 13     | 28    | 15      | 13      | 629.166120                               | -0.000172                                                      |
| 29   | 17     | 13     | 28    | 16      | 13      | 629.166120                               | -0.000172                                                      |
| 29   | 14     | 16     | 28    | 13      | 16      | 629.179540                               | 0.000181                                                       |
| 29   | 13     | 16     | 28    | 12      | 16      | 629.179540                               | 0.000181                                                       |
| 29   | 13     | 17     | 28    | 12      | 17      | 629.183360                               | 0.000163                                                       |
| 29   | 12     | 17     | 28    | 11      | 17      | 629.183360                               | 0.000163                                                       |
| 29   | 11     | 19     | 28    | 10      | 19      | 629.190740                               | 0.000129                                                       |
| 29   | 10     | 19     | 28    | 9       | 19      | 629.190740                               | 0.000129                                                       |
| 29   | 7      | 23     | 28    | 6       | 23      | 629.205830                               | 0.000295                                                       |
| 29   | 6      | 23     | 28    | 5       | 23      | 629.205830                               | 0.000295                                                       |
| 29   | 25     | 4      | 28    | 24      | 4       | 629.213270                               | 0.000519                                                       |
| 29   | 25     | 5      | 28    | 24      | 5       | 629.213270                               | -0.000693                                                      |
| 29   | 26     | 3      | 28    | 25      | 3       | 629.252230                               | 0.000074                                                       |
| 29   | 26     | 4      | 28    | 25      | 4       | 629.252230                               | -0.000014                                                      |
| 29   | 26     | 3      | 28    | 25      | 4       | 629.252230                               | -0.000126                                                      |
| 29   | 26     | 4      | 28    | 25      | 3       | 629.252230                               | 0.000186                                                       |
| 29   | 27     | 2      | 28    | 26      | 2       | 629.289980                               | 0.000200                                                       |
| 29   | 27     | 3      | 28    | 26      | 3       | 629.289980                               | 0.000196                                                       |
| 29   | 27     | 2      | 28    | 26      | 3       | 629.289980                               | 0.000191                                                       |
| 29   | 27     | 3      | 28    | 26      | 2       | 629.289980                               | 0.000205                                                       |
| 29   | 28     | 1      | 28    | 27      | 1       | 629.327040                               | 0.000235                                                       |
| 29   | 28     | 2      | 28    | 27      | 2       | 629.327040                               | 0.000235                                                       |
| 29   | 28     | 1      | 28    | 27      | 2       | 629.327040                               | 0.000235                                                       |
| 29   | 28     | 2      | 28    | 27      | 1       | 629.327040                               | 0.000235                                                       |
| 29   | 29     | 0      | 28    | 28      | 0       | 629.363670                               | 0.000080                                                       |
| 29   | 29     | 1      | 28    | 28      | 1       | 629.363670                               | 0.000080                                                       |
| 29   | 29     | 0      | 28    | 28      | 1       | 629.363670                               | 0.000080                                                       |
| 29   | 29     | 1      | 28    | 28      | 0       | 629.363670                               | 0.000080                                                       |
| 30   | 17     | 13     | 29    | 16      | 13      | 629.369540                               | -0.000404                                                      |
| 30   | 18     | 13     | 29    | 17      | 13      | 629.369540                               | -0.000404                                                      |
| 30   | 16     | 15     | 29    | 15      | 15      | 629.379750                               | 0.000232                                                       |
| 30   | 15     | 15     | 29    | 14      | 15      | 629.379750                               | 0.000232                                                       |
| 30   | 14     | 17     | 29    | 13      | 17      | 629.387610                               | -0.000078                                                      |
| 30   | 13     | 17     | 29    | 12      | 17      | 629.387610                               | -0.000078                                                      |
| 30   | 12     | 19     | 29    | 11      | 19      | 629.395770                               | 0.000463                                                       |
| 30   | 11     | 19     | 29    | 10      | 19      | 629.395770                               | 0.000463                                                       |
| 30   | 8      | 23     | 29    | 7       | 23      | 629.410680                               | 0.000237                                                       |
| 30   | 7      | 23     | 29    | 6       | 23      | 629.410680                               | 0.000237                                                       |
| 30   | 26     | 4      | 29    | 25      | 4       | 629.426690                               | 0.000487                                                       |
| 30   | 26     | 5      | 29    | 25      | 5       | 629.426690                               | -0.000227                                                      |

Continuation, see next page

Continuation of Table 28:  $\nu_{22} \leftarrow gs$  of dithiine.

| $J'$ | $K'_a$ | $K'_c$ | $J''$ | $K''_a$ | $K''_c$ | $\tilde{\nu}_{obs}$<br>/cm <sup>-1</sup> | $(\tilde{\nu}_{obs} - \tilde{\nu}_{cal})$<br>/cm <sup>-1</sup> |
|------|--------|--------|-------|---------|---------|------------------------------------------|----------------------------------------------------------------|
| 30   | 27     | 3      | 29    | 26      | 3       | 629.465410                               | 0.000463                                                       |
| 30   | 27     | 4      | 29    | 26      | 4       | 629.465410                               | 0.000415                                                       |
| 30   | 27     | 3      | 29    | 26      | 4       | 629.465410                               | 0.000354                                                       |
| 30   | 27     | 4      | 29    | 26      | 3       | 629.465410                               | 0.000524                                                       |
| 30   | 28     | 2      | 29    | 27      | 2       | 629.502420                               | 0.000133                                                       |
| 30   | 28     | 3      | 29    | 27      | 3       | 629.502420                               | 0.000130                                                       |
| 30   | 28     | 2      | 29    | 27      | 3       | 629.502420                               | 0.000128                                                       |
| 30   | 28     | 3      | 29    | 27      | 2       | 629.502420                               | 0.000135                                                       |
| 30   | 29     | 1      | 29    | 28      | 1       | 629.539450                               | 0.000341                                                       |
| 30   | 29     | 2      | 29    | 28      | 2       | 629.539450                               | 0.000341                                                       |
| 30   | 29     | 1      | 29    | 28      | 2       | 629.539450                               | 0.000341                                                       |
| 30   | 29     | 2      | 29    | 28      | 1       | 629.539450                               | 0.000341                                                       |
| 31   | 18     | 13     | 30    | 17      | 13      | 629.573170                               | -0.000086                                                      |
| 31   | 19     | 13     | 30    | 18      | 13      | 629.573170                               | -0.000088                                                      |
| 30   | 30     | 0      | 29    | 29      | 0       | 629.575760                               | 0.000034                                                       |
| 30   | 30     | 1      | 29    | 29      | 1       | 629.575760                               | 0.000034                                                       |
| 30   | 30     | 0      | 29    | 29      | 1       | 629.575760                               | 0.000034                                                       |
| 30   | 30     | 1      | 29    | 29      | 0       | 629.575760                               | 0.000034                                                       |
| 31   | 17     | 15     | 30    | 16      | 15      | 629.583930                               | 0.000512                                                       |
| 31   | 16     | 15     | 30    | 15      | 15      | 629.583930                               | 0.000512                                                       |
| 31   | 16     | 16     | 30    | 15      | 16      | 629.588070                               | 0.000260                                                       |
| 31   | 15     | 16     | 30    | 14      | 16      | 629.588070                               | 0.000260                                                       |
| 31   | 15     | 17     | 30    | 14      | 17      | 629.592030                               | 0.000098                                                       |
| 31   | 14     | 17     | 30    | 13      | 17      | 629.592030                               | 0.000098                                                       |
| 31   | 13     | 19     | 30    | 12      | 19      | 629.599700                               | -0.000071                                                      |
| 31   | 12     | 19     | 30    | 11      | 19      | 629.599700                               | -0.000071                                                      |
| 31   | 11     | 21     | 30    | 10      | 21      | 629.607390                               | -0.000019                                                      |
| 31   | 10     | 21     | 30    | 9       | 21      | 629.607390                               | -0.000019                                                      |
| 31   | 9      | 23     | 30    | 8       | 23      | 629.615470                               | 0.000334                                                       |
| 31   | 8      | 23     | 30    | 7       | 23      | 629.615470                               | 0.000334                                                       |
| 31   | 27     | 4      | 30    | 26      | 4       | 629.639510                               | 0.000273                                                       |
| 31   | 27     | 5      | 30    | 26      | 5       | 629.639510                               | -0.000142                                                      |
| 31   | 28     | 3      | 30    | 27      | 3       | 629.677510                               | 0.000062                                                       |
| 31   | 28     | 4      | 30    | 27      | 4       | 629.677510                               | 0.000035                                                       |
| 31   | 28     | 3      | 30    | 27      | 4       | 629.677510                               | 0.000002                                                       |
| 31   | 28     | 4      | 30    | 27      | 3       | 629.677510                               | 0.000094                                                       |
| 31   | 29     | 2      | 30    | 28      | 2       | 629.714610                               | 0.000092                                                       |
| 31   | 29     | 3      | 30    | 28      | 3       | 629.714610                               | 0.000091                                                       |
| 31   | 29     | 2      | 30    | 28      | 3       | 629.714610                               | 0.000090                                                       |
| 31   | 29     | 3      | 30    | 28      | 2       | 629.714610                               | 0.000094                                                       |
| 31   | 30     | 1      | 30    | 29      | 1       | 629.751450                               | 0.000311                                                       |
| 31   | 30     | 2      | 30    | 29      | 2       | 629.751450                               | 0.000311                                                       |
| 31   | 30     | 1      | 30    | 29      | 2       | 629.751450                               | 0.000311                                                       |
| 31   | 30     | 2      | 30    | 29      | 1       | 629.751450                               | 0.000311                                                       |
| 32   | 19     | 13     | 31    | 18      | 13      | 629.776390                               | 0.000145                                                       |
| 32   | 20     | 13     | 31    | 19      | 13      | 629.776390                               | 0.000141                                                       |

Continuation, see next page

Continuation of Table 28:  $\nu_{22} \leftarrow gs$  of dithiine.

| $J'$ | $K'_a$ | $K'_c$ | $J''$ | $K''_a$ | $K''_c$ | $\tilde{\nu}_{obs}$<br>/cm <sup>-1</sup> | $(\tilde{\nu}_{obs} - \tilde{\nu}_{cal})$<br>/cm <sup>-1</sup> |
|------|--------|--------|-------|---------|---------|------------------------------------------|----------------------------------------------------------------|
| 31   | 31     | 0      | 30    | 30      | 0       | 629.787590                               | 0.000007                                                       |
| 31   | 31     | 1      | 30    | 30      | 1       | 629.787590                               | 0.000007                                                       |
| 32   | 18     | 15     | 31    | 17      | 15      | 629.787590                               | 0.000544                                                       |
| 32   | 17     | 15     | 31    | 16      | 15      | 629.787590                               | 0.000544                                                       |
| 31   | 31     | 0      | 30    | 30      | 1       | 629.787590                               | 0.000007                                                       |
| 31   | 31     | 1      | 30    | 30      | 0       | 629.787590                               | 0.000007                                                       |
| 32   | 17     | 16     | 31    | 16      | 16      | 629.791730                               | 0.000092                                                       |
| 32   | 16     | 16     | 31    | 15      | 16      | 629.791730                               | 0.000092                                                       |
| 32   | 16     | 17     | 31    | 15      | 17      | 629.795800                               | -0.000126                                                      |
| 32   | 15     | 17     | 31    | 14      | 17      | 629.795800                               | -0.000126                                                      |
| 32   | 14     | 19     | 31    | 13      | 19      | 629.804000                               | 0.000002                                                       |
| 32   | 13     | 19     | 31    | 12      | 19      | 629.804000                               | 0.000002                                                       |
| 32   | 12     | 20     | 31    | 11      | 20      | 629.808040                               | 0.000136                                                       |
| 32   | 13     | 20     | 31    | 12      | 20      | 629.808040                               | 0.000136                                                       |
| 32   | 12     | 21     | 31    | 11      | 21      | 629.812030                               | 0.000245                                                       |
| 32   | 11     | 21     | 31    | 10      | 21      | 629.812030                               | 0.000245                                                       |
| 32   | 28     | 4      | 31    | 27      | 4       | 629.852270                               | 0.000353                                                       |
| 32   | 28     | 5      | 31    | 27      | 5       | 629.852270                               | 0.000115                                                       |
| 32   | 28     | 4      | 31    | 27      | 5       | 629.852270                               | -0.000212                                                      |
| 32   | 29     | 3      | 31    | 28      | 3       | 629.889660                               | -0.000001                                                      |
| 32   | 29     | 4      | 31    | 28      | 4       | 629.889660                               | -0.000016                                                      |
| 32   | 29     | 3      | 31    | 28      | 4       | 629.889660                               | -0.000033                                                      |
| 32   | 29     | 4      | 31    | 28      | 3       | 629.889660                               | 0.000016                                                       |
| 32   | 30     | 2      | 31    | 29      | 2       | 629.926560                               | 0.000086                                                       |
| 32   | 30     | 3      | 31    | 29      | 3       | 629.926560                               | 0.000086                                                       |
| 32   | 30     | 2      | 31    | 29      | 3       | 629.926560                               | 0.000085                                                       |
| 32   | 30     | 3      | 31    | 29      | 2       | 629.926560                               | 0.000087                                                       |
| 32   | 31     | 1      | 31    | 30      | 1       | 629.962980                               | 0.000086                                                       |
| 32   | 31     | 2      | 31    | 30      | 2       | 629.962980                               | 0.000086                                                       |
| 32   | 31     | 1      | 31    | 30      | 2       | 629.962980                               | 0.000086                                                       |
| 32   | 31     | 2      | 31    | 30      | 1       | 629.962980                               | 0.000086                                                       |
| 33   | 20     | 13     | 32    | 19      | 13      | 629.978600                               | -0.000322                                                      |
| 33   | 21     | 13     | 32    | 20      | 13      | 629.978600                               | -0.000330                                                      |
| 33   | 19     | 15     | 32    | 18      | 15      | 629.990440                               | 0.000035                                                       |
| 33   | 18     | 15     | 32    | 17      | 15      | 629.990440                               | 0.000035                                                       |
| 33   | 18     | 16     | 32    | 17      | 16      | 629.995220                               | 0.000000                                                       |
| 33   | 17     | 16     | 32    | 16      | 16      | 629.995220                               | 0.000000                                                       |
| 32   | 32     | 0      | 31    | 31      | 0       | 629.999400                               | 0.000241                                                       |
| 32   | 32     | 1      | 31    | 31      | 1       | 629.999400                               | 0.000241                                                       |
| 33   | 17     | 17     | 32    | 16      | 17      | 629.999400                               | -0.000290                                                      |
| 33   | 16     | 17     | 32    | 15      | 17      | 629.999400                               | -0.000290                                                      |
| 32   | 32     | 0      | 31    | 31      | 1       | 629.999400                               | 0.000241                                                       |
| 32   | 32     | 1      | 31    | 31      | 0       | 629.999400                               | 0.000241                                                       |
| 33   | 15     | 19     | 32    | 14      | 19      | 630.008070                               | 0.000068                                                       |
| 33   | 14     | 19     | 32    | 13      | 19      | 630.008070                               | 0.000068                                                       |
| 33   | 13     | 20     | 32    | 12      | 20      | 630.012240                               | 0.000242                                                       |

Continuation, see next page

Continuation of Table 28:  $\nu_{22} \leftarrow gs$  of dithiine.

| $J'$ | $K'_a$ | $K'_c$ | $J''$ | $K''_a$ | $K''_c$ | $\tilde{\nu}_{obs}$<br>/cm <sup>-1</sup> | $(\tilde{\nu}_{obs} - \tilde{\nu}_{cal})$<br>/cm <sup>-1</sup> |
|------|--------|--------|-------|---------|---------|------------------------------------------|----------------------------------------------------------------|
| 33   | 14     | 20     | 32    | 13      | 20      | 630.012240                               | 0.000242                                                       |
| 33   | 12     | 22     | 32    | 11      | 22      | 630.019850                               | -0.000046                                                      |
| 33   | 11     | 22     | 32    | 10      | 22      | 630.019850                               | -0.000046                                                      |
| 33   | 11     | 23     | 32    | 10      | 23      | 630.023980                               | 0.000114                                                       |
| 33   | 10     | 23     | 32    | 9       | 23      | 630.023980                               | 0.000114                                                       |
| 33   | 29     | 4      | 32    | 28      | 4       | 630.064400                               | 0.000148                                                       |
| 33   | 29     | 5      | 32    | 28      | 5       | 630.064400                               | 0.000013                                                       |
| 33   | 29     | 4      | 32    | 28      | 5       | 630.064400                               | -0.000170                                                      |
| 33   | 29     | 5      | 32    | 28      | 4       | 630.064400                               | 0.000330                                                       |
| 33   | 30     | 3      | 32    | 29      | 3       | 630.101770                               | 0.000163                                                       |
| 33   | 30     | 4      | 32    | 29      | 4       | 630.101770                               | 0.000155                                                       |
| 33   | 30     | 3      | 32    | 29      | 4       | 630.101770                               | 0.000146                                                       |
| 33   | 30     | 4      | 32    | 29      | 3       | 630.101770                               | 0.000172                                                       |
| 33   | 31     | 2      | 32    | 30      | 2       | 630.138390                               | 0.000227                                                       |
| 33   | 31     | 3      | 32    | 30      | 3       | 630.138390                               | 0.000227                                                       |
| 33   | 31     | 2      | 32    | 30      | 3       | 630.138390                               | 0.000227                                                       |
| 33   | 31     | 3      | 32    | 30      | 2       | 630.138390                               | 0.000228                                                       |
| 33   | 32     | 1      | 32    | 31      | 1       | 630.174530                               | 0.000149                                                       |
| 33   | 32     | 2      | 32    | 31      | 2       | 630.174530                               | 0.000149                                                       |
| 33   | 32     | 1      | 32    | 31      | 2       | 630.174530                               | 0.000149                                                       |
| 33   | 32     | 2      | 32    | 31      | 1       | 630.174530                               | 0.000149                                                       |
| 34   | 21     | 13     | 33    | 20      | 13      | 630.180970                               | -0.000294                                                      |
| 34   | 22     | 13     | 33    | 21      | 13      | 630.180970                               | -0.000312                                                      |
| 34   | 20     | 15     | 33    | 19      | 15      | 630.193460                               | -0.000032                                                      |
| 34   | 19     | 15     | 33    | 18      | 15      | 630.193460                               | -0.000032                                                      |
| 34   | 19     | 16     | 33    | 18      | 16      | 630.198450                               | -0.000106                                                      |
| 34   | 18     | 16     | 33    | 17      | 16      | 630.198450                               | -0.000106                                                      |
| 34   | 18     | 17     | 33    | 17      | 17      | 630.203160                               | -0.000044                                                      |
| 34   | 17     | 17     | 33    | 16      | 17      | 630.203160                               | -0.000044                                                      |
| 33   | 33     | 0      | 32    | 32      | 0       | 630.210520                               | 0.000071                                                       |
| 33   | 33     | 1      | 32    | 32      | 1       | 630.210520                               | 0.000071                                                       |
| 33   | 33     | 0      | 32    | 32      | 1       | 630.210520                               | 0.000071                                                       |
| 33   | 33     | 1      | 32    | 32      | 0       | 630.210520                               | 0.000071                                                       |
| 34   | 16     | 19     | 33    | 15      | 19      | 630.212380                               | 0.000596                                                       |
| 34   | 15     | 19     | 33    | 14      | 19      | 630.212380                               | 0.000596                                                       |
| 34   | 14     | 20     | 33    | 13      | 20      | 630.216110                               | 0.000236                                                       |
| 34   | 15     | 20     | 33    | 14      | 20      | 630.216110                               | 0.000236                                                       |
| 34   | 14     | 21     | 33    | 13      | 21      | 630.219860                               | -0.000050                                                      |
| 34   | 13     | 21     | 33    | 12      | 21      | 630.219860                               | -0.000050                                                      |
| 34   | 13     | 22     | 33    | 12      | 22      | 630.223790                               | -0.000121                                                      |
| 34   | 12     | 22     | 33    | 11      | 22      | 630.223790                               | -0.000121                                                      |
| 34   | 10     | 25     | 33    | 9       | 25      | 630.236040                               | -0.000049                                                      |
| 34   | 9      | 25     | 33    | 8       | 25      | 630.236040                               | -0.000049                                                      |
| 34   | 30     | 4      | 33    | 29      | 4       | 630.276550                               | 0.000248                                                       |
| 34   | 30     | 5      | 33    | 29      | 5       | 630.276550                               | 0.000173                                                       |
| 34   | 30     | 4      | 33    | 29      | 5       | 630.276550                               | 0.000072                                                       |

Continuation, see next page

Continuation of Table 28:  $\nu_{22} \leftarrow gs$  of dithiine.

| $J'$ | $K'_a$ | $K'_c$ | $J''$ | $K''_a$ | $K''_c$ | $\tilde{\nu}_{obs}$<br>/cm <sup>-1</sup> | $(\tilde{\nu}_{obs} - \tilde{\nu}_{cal})$<br>/cm <sup>-1</sup> |
|------|--------|--------|-------|---------|---------|------------------------------------------|----------------------------------------------------------------|
| 34   | 30     | 5      | 33    | 29      | 4       | 630.276550                               | 0.000350                                                       |
| 34   | 31     | 3      | 33    | 30      | 3       | 630.313460                               | 0.000169                                                       |
| 34   | 31     | 4      | 33    | 30      | 4       | 630.313460                               | 0.000165                                                       |
| 34   | 31     | 3      | 33    | 30      | 4       | 630.313460                               | 0.000160                                                       |
| 34   | 31     | 4      | 33    | 30      | 3       | 630.313460                               | 0.000174                                                       |
| 34   | 32     | 2      | 33    | 31      | 2       | 630.349480                               | -0.000120                                                      |
| 34   | 32     | 3      | 33    | 31      | 3       | 630.349480                               | -0.000120                                                      |
| 34   | 32     | 2      | 33    | 31      | 3       | 630.349480                               | -0.000121                                                      |
| 34   | 32     | 3      | 33    | 31      | 2       | 630.349480                               | -0.000120                                                      |
| 35   | 22     | 13     | 34    | 21      | 13      | 630.383230                               | -0.000059                                                      |
| 35   | 23     | 13     | 34    | 22      | 13      | 630.383230                               | -0.000095                                                      |
| 34   | 33     | 1      | 33    | 32      | 1       | 630.385570                               | -0.000024                                                      |
| 34   | 33     | 2      | 33    | 32      | 2       | 630.385570                               | -0.000024                                                      |
| 34   | 33     | 1      | 33    | 32      | 2       | 630.385570                               | -0.000024                                                      |
| 34   | 33     | 2      | 33    | 32      | 1       | 630.385570                               | -0.000024                                                      |
| 35   | 21     | 15     | 34    | 20      | 15      | 630.396160                               | -0.000169                                                      |
| 35   | 20     | 15     | 34    | 19      | 15      | 630.396160                               | -0.000169                                                      |
| 35   | 20     | 16     | 34    | 19      | 16      | 630.401180                               | -0.000465                                                      |
| 35   | 19     | 16     | 34    | 18      | 16      | 630.401180                               | -0.000465                                                      |
| 35   | 19     | 17     | 34    | 18      | 17      | 630.406600                               | 0.000096                                                       |
| 35   | 18     | 17     | 34    | 17      | 17      | 630.406600                               | 0.000096                                                       |
| 35   | 15     | 20     | 34    | 14      | 20      | 630.419660                               | 0.000100                                                       |
| 35   | 16     | 20     | 34    | 15      | 20      | 630.419660                               | 0.000100                                                       |
| 34   | 34     | 0      | 33    | 33      | 0       | 630.421630                               | 0.000150                                                       |
| 34   | 34     | 1      | 33    | 33      | 1       | 630.421630                               | 0.000150                                                       |
| 34   | 34     | 0      | 33    | 33      | 1       | 630.421630                               | 0.000150                                                       |
| 34   | 34     | 1      | 33    | 33      | 0       | 630.421630                               | 0.000150                                                       |
| 35   | 15     | 21     | 34    | 14      | 21      | 630.423270                               | -0.000397                                                      |
| 35   | 14     | 21     | 34    | 13      | 21      | 630.423270                               | -0.000397                                                      |
| 35   | 14     | 22     | 34    | 13      | 22      | 630.427690                               | -0.000054                                                      |
| 35   | 13     | 22     | 34    | 12      | 22      | 630.427690                               | -0.000054                                                      |
| 35   | 11     | 25     | 34    | 10      | 25      | 630.439960                               | -0.000083                                                      |
| 35   | 10     | 25     | 34    | 9       | 25      | 630.439960                               | -0.000083                                                      |
| 35   | 30     | 5      | 34    | 29      | 5       | 630.450270                               | 0.000235                                                       |
| 35   | 30     | 6      | 34    | 29      | 6       | 630.450270                               | -0.000328                                                      |
| 35   | 31     | 4      | 34    | 30      | 4       | 630.488170                               | 0.000108                                                       |
| 35   | 31     | 5      | 34    | 30      | 5       | 630.488170                               | 0.000066                                                       |
| 35   | 31     | 4      | 34    | 30      | 5       | 630.488170                               | 0.000011                                                       |
| 35   | 31     | 5      | 34    | 30      | 4       | 630.488170                               | 0.000164                                                       |
| 35   | 32     | 3      | 34    | 31      | 3       | 630.524830                               | 0.000111                                                       |
| 35   | 32     | 4      | 34    | 31      | 4       | 630.524830                               | 0.000109                                                       |
| 35   | 32     | 3      | 34    | 31      | 4       | 630.524830                               | 0.000106                                                       |
| 35   | 32     | 4      | 34    | 31      | 3       | 630.524830                               | 0.000114                                                       |
| 35   | 33     | 2      | 34    | 32      | 2       | 630.561030                               | 0.000257                                                       |
| 35   | 33     | 3      | 34    | 32      | 3       | 630.561030                               | 0.000257                                                       |
| 35   | 33     | 2      | 34    | 32      | 3       | 630.561030                               | 0.000257                                                       |

Continuation, see next page

Continuation of Table 28:  $\nu_{22} \leftarrow gs$  of dithiine.

| $J'$ | $K'_a$ | $K'_c$ | $J''$ | $K''_a$ | $K''_c$ | $\tilde{\nu}_{obs}$<br>/cm <sup>-1</sup> | $(\tilde{\nu}_{obs} - \tilde{\nu}_{cal})$<br>/cm <sup>-1</sup> |
|------|--------|--------|-------|---------|---------|------------------------------------------|----------------------------------------------------------------|
| 35   | 33     | 3      | 34    | 32      | 2       | 630.561030                               | 0.000257                                                       |
| 36   | 23     | 13     | 35    | 22      | 13      | 630.584860                               | -0.000115                                                      |
| 36   | 24     | 13     | 35    | 23      | 13      | 630.584860                               | -0.000186                                                      |
| 35   | 34     | 1      | 34    | 33      | 1       | 630.596440                               | -0.000119                                                      |
| 35   | 34     | 2      | 34    | 33      | 2       | 630.596440                               | -0.000119                                                      |
| 35   | 34     | 1      | 34    | 33      | 2       | 630.596440                               | -0.000119                                                      |
| 35   | 34     | 2      | 34    | 33      | 1       | 630.596440                               | -0.000119                                                      |
| 36   | 22     | 15     | 35    | 21      | 15      | 630.598760                               | -0.000162                                                      |
| 36   | 21     | 15     | 35    | 20      | 15      | 630.598760                               | -0.000162                                                      |
| 36   | 21     | 16     | 35    | 20      | 16      | 630.604410                               | -0.000107                                                      |
| 36   | 20     | 16     | 35    | 19      | 16      | 630.604410                               | -0.000107                                                      |
| 36   | 20     | 17     | 35    | 19      | 17      | 630.609490                               | -0.000091                                                      |
| 36   | 19     | 17     | 35    | 18      | 17      | 630.609490                               | -0.000091                                                      |
| 36   | 18     | 19     | 35    | 17      | 19      | 630.618540                               | -0.000211                                                      |
| 36   | 17     | 19     | 35    | 16      | 19      | 630.618540                               | -0.000211                                                      |
| 36   | 16     | 20     | 35    | 15      | 20      | 630.623090                               | 0.000042                                                       |
| 36   | 17     | 20     | 35    | 16      | 20      | 630.623090                               | 0.000042                                                       |
| 36   | 16     | 21     | 35    | 15      | 21      | 630.627270                               | 0.000023                                                       |
| 36   | 15     | 21     | 35    | 14      | 21      | 630.627270                               | 0.000023                                                       |
| 35   | 35     | 0      | 34    | 34      | 0       | 630.632250                               | 0.000010                                                       |
| 35   | 35     | 1      | 34    | 34      | 1       | 630.632250                               | 0.000010                                                       |
| 35   | 35     | 0      | 34    | 34      | 1       | 630.632250                               | 0.000010                                                       |
| 35   | 35     | 1      | 34    | 34      | 0       | 630.632250                               | 0.000010                                                       |
| 36   | 12     | 25     | 35    | 11      | 25      | 630.644150                               | 0.000338                                                       |
| 36   | 11     | 25     | 35    | 10      | 25      | 630.644150                               | 0.000338                                                       |
| 36   | 31     | 5      | 35    | 30      | 5       | 630.662210                               | 0.000120                                                       |
| 36   | 31     | 6      | 35    | 30      | 6       | 630.662210                               | -0.000209                                                      |
| 36   | 32     | 4      | 35    | 31      | 4       | 630.699480                               | -0.000089                                                      |
| 36   | 32     | 5      | 35    | 31      | 5       | 630.699480                               | -0.000112                                                      |
| 36   | 32     | 4      | 35    | 31      | 5       | 630.699480                               | -0.000142                                                      |
| 36   | 32     | 5      | 35    | 31      | 4       | 630.699480                               | -0.000058                                                      |
| 36   | 33     | 3      | 35    | 32      | 3       | 630.735940                               | 0.000055                                                       |
| 36   | 33     | 4      | 35    | 32      | 4       | 630.735940                               | 0.000054                                                       |
| 36   | 33     | 3      | 35    | 32      | 4       | 630.735940                               | 0.000053                                                       |
| 36   | 33     | 4      | 35    | 32      | 3       | 630.735940                               | 0.000056                                                       |
| 36   | 34     | 2      | 35    | 33      | 2       | 630.771910                               | 0.000217                                                       |
| 36   | 34     | 3      | 35    | 33      | 3       | 630.771910                               | 0.000217                                                       |
| 36   | 34     | 2      | 35    | 33      | 3       | 630.771910                               | 0.000217                                                       |
| 36   | 34     | 3      | 35    | 33      | 2       | 630.771910                               | 0.000217                                                       |
| 37   | 24     | 13     | 36    | 23      | 13      | 630.786390                               | 0.000075                                                       |
| 37   | 25     | 13     | 36    | 24      | 13      | 630.786390                               | -0.000062                                                      |
| 37   | 23     | 15     | 36    | 22      | 15      | 630.801090                               | -0.000174                                                      |
| 37   | 22     | 15     | 36    | 21      | 15      | 630.801090                               | -0.000173                                                      |
| 36   | 35     | 1      | 35    | 34      | 1       | 630.807400                               | 0.000148                                                       |
| 36   | 35     | 2      | 35    | 34      | 2       | 630.807400                               | 0.000148                                                       |
| 36   | 35     | 1      | 35    | 34      | 2       | 630.807400                               | 0.000148                                                       |

Continuation, see next page

Continuation of Table 28:  $\nu_{22} \leftarrow gs$  of dithiine.

| $J'$ | $K'_a$ | $K'_c$ | $J''$ | $K''_a$ | $K''_c$ | $\tilde{\nu}_{obs}$<br>/cm <sup>-1</sup> | $(\tilde{\nu}_{obs} - \tilde{\nu}_{cal})$<br>/cm <sup>-1</sup> |
|------|--------|--------|-------|---------|---------|------------------------------------------|----------------------------------------------------------------|
| 36   | 35     | 2      | 35    | 34      | 1       | 630.807400                               | 0.000148                                                       |
| 37   | 21     | 17     | 36    | 20      | 17      | 630.812330                               | -0.000122                                                      |
| 37   | 20     | 17     | 36    | 19      | 17      | 630.812330                               | -0.000122                                                      |
| 37   | 17     | 20     | 36    | 16      | 20      | 630.826340                               | -0.000016                                                      |
| 37   | 18     | 20     | 36    | 17      | 20      | 630.826340                               | -0.000016                                                      |
| 37   | 17     | 21     | 36    | 16      | 21      | 630.830030                               | -0.000611                                                      |
| 37   | 16     | 21     | 36    | 15      | 21      | 630.830030                               | -0.000611                                                      |
| 37   | 16     | 22     | 36    | 15      | 22      | 630.834470                               | -0.000390                                                      |
| 37   | 15     | 22     | 36    | 14      | 22      | 630.834470                               | -0.000390                                                      |
| 36   | 36     | 0      | 35    | 35      | 0       | 630.843070                               | 0.000338                                                       |
| 36   | 36     | 1      | 35    | 35      | 1       | 630.843070                               | 0.000338                                                       |
| 36   | 36     | 0      | 35    | 35      | 1       | 630.843070                               | 0.000338                                                       |
| 36   | 36     | 1      | 35    | 35      | 0       | 630.843070                               | 0.000338                                                       |
| 37   | 13     | 25     | 36    | 12      | 25      | 630.847560                               | 0.000129                                                       |
| 37   | 12     | 25     | 36    | 11      | 25      | 630.847560                               | 0.000129                                                       |
| 37   | 10     | 28     | 36    | 9       | 28      | 630.860490                               | 0.000106                                                       |
| 37   | 9      | 28     | 36    | 8       | 28      | 630.860490                               | 0.000106                                                       |
| 37   | 33     | 4      | 36    | 32      | 4       | 630.910690                               | -0.000117                                                      |
| 37   | 33     | 5      | 36    | 32      | 5       | 630.910690                               | -0.000130                                                      |
| 37   | 33     | 4      | 36    | 32      | 5       | 630.910690                               | -0.000147                                                      |
| 37   | 33     | 5      | 36    | 32      | 4       | 630.910690                               | -0.000101                                                      |
| 37   | 34     | 3      | 36    | 33      | 3       | 630.946410                               | -0.000412                                                      |
| 37   | 34     | 4      | 36    | 33      | 4       | 630.946410                               | -0.000412                                                      |
| 37   | 34     | 3      | 36    | 33      | 4       | 630.946410                               | -0.000413                                                      |
| 37   | 34     | 4      | 36    | 33      | 3       | 630.946410                               | -0.000411                                                      |
| 37   | 35     | 2      | 36    | 34      | 2       | 630.982090                               | -0.000275                                                      |
| 37   | 35     | 3      | 36    | 34      | 3       | 630.982090                               | -0.000275                                                      |
| 37   | 35     | 2      | 36    | 34      | 3       | 630.982090                               | -0.000275                                                      |
| 37   | 35     | 3      | 36    | 34      | 2       | 630.982090                               | -0.000275                                                      |
| 38   | 24     | 15     | 37    | 23      | 15      | 631.003060                               | -0.000304                                                      |
| 38   | 23     | 15     | 37    | 22      | 15      | 631.003060                               | -0.000303                                                      |
| 38   | 23     | 16     | 37    | 22      | 16      | 631.009100                               | -0.000473                                                      |
| 38   | 22     | 16     | 37    | 21      | 16      | 631.009100                               | -0.000473                                                      |
| 38   | 22     | 17     | 37    | 21      | 17      | 631.015040                               | -0.000071                                                      |
| 38   | 21     | 17     | 37    | 20      | 17      | 631.015040                               | -0.000071                                                      |
| 37   | 36     | 1      | 36    | 35      | 1       | 631.017780                               | 0.000077                                                       |
| 37   | 36     | 2      | 36    | 35      | 2       | 631.017780                               | 0.000077                                                       |
| 37   | 36     | 1      | 36    | 35      | 2       | 631.017780                               | 0.000077                                                       |
| 37   | 36     | 2      | 36    | 35      | 1       | 631.017780                               | 0.000077                                                       |
| 38   | 18     | 20     | 37    | 17      | 20      | 631.029260                               | -0.000223                                                      |
| 38   | 19     | 20     | 37    | 18      | 20      | 631.029260                               | -0.000223                                                      |
| 38   | 18     | 21     | 37    | 17      | 21      | 631.033870                               | 0.000004                                                       |
| 38   | 17     | 21     | 37    | 16      | 21      | 631.033870                               | 0.000004                                                       |
| 38   | 17     | 22     | 37    | 16      | 22      | 631.038210                               | 0.000044                                                       |
| 38   | 16     | 22     | 37    | 15      | 22      | 631.038210                               | 0.000044                                                       |
| 38   | 16     | 23     | 37    | 15      | 23      | 631.043000                               | 0.000591                                                       |

Continuation, see next page

Continuation of Table 28:  $\nu_{22} \leftarrow gs$  of dithiine.

| $J'$ | $K'_a$ | $K'_c$ | $J''$ | $K''_a$ | $K''_c$ | $\tilde{\nu}_{obs}$<br>/cm <sup>-1</sup> | $(\tilde{\nu}_{obs} - \tilde{\nu}_{cal})$<br>/cm <sup>-1</sup> |
|------|--------|--------|-------|---------|---------|------------------------------------------|----------------------------------------------------------------|
| 38   | 15     | 23     | 37    | 14      | 23      | 631.043000                               | 0.000591                                                       |
| 38   | 14     | 25     | 37    | 13      | 25      | 631.050570                               | -0.000307                                                      |
| 38   | 13     | 25     | 37    | 12      | 25      | 631.050570                               | -0.000307                                                      |
| 37   | 37     | 0      | 36    | 36      | 0       | 631.053220                               | 0.000251                                                       |
| 37   | 37     | 1      | 36    | 36      | 1       | 631.053220                               | 0.000251                                                       |
| 37   | 37     | 0      | 36    | 36      | 1       | 631.053220                               | 0.000251                                                       |
| 37   | 37     | 1      | 36    | 36      | 0       | 631.053220                               | 0.000251                                                       |
| 38   | 11     | 28     | 37    | 10      | 28      | 631.064220                               | 0.000322                                                       |
| 38   | 10     | 28     | 37    | 9       | 28      | 631.064220                               | 0.000322                                                       |
| 38   | 33     | 5      | 37    | 32      | 5       | 631.085420                               | 0.000146                                                       |
| 38   | 33     | 6      | 37    | 32      | 6       | 631.085420                               | 0.000038                                                       |
| 38   | 33     | 5      | 37    | 32      | 6       | 631.085420                               | -0.000117                                                      |
| 38   | 33     | 6      | 37    | 32      | 5       | 631.085420                               | 0.000301                                                       |
| 38   | 34     | 4      | 37    | 33      | 4       | 631.121600                               | -0.000207                                                      |
| 38   | 34     | 5      | 37    | 33      | 5       | 631.121600                               | -0.000214                                                      |
| 38   | 34     | 4      | 37    | 33      | 5       | 631.121600                               | -0.000223                                                      |
| 38   | 34     | 5      | 37    | 33      | 4       | 631.121600                               | -0.000198                                                      |
| 38   | 35     | 3      | 37    | 34      | 3       | 631.157350                               | -0.000157                                                      |
| 38   | 35     | 4      | 37    | 34      | 4       | 631.157350                               | -0.000157                                                      |
| 38   | 35     | 3      | 37    | 34      | 4       | 631.157350                               | -0.000158                                                      |
| 38   | 35     | 4      | 37    | 34      | 3       | 631.157350                               | -0.000157                                                      |
| 38   | 36     | 2      | 37    | 35      | 2       | 631.192590                               | -0.000205                                                      |
| 38   | 36     | 3      | 37    | 35      | 3       | 631.192590                               | -0.000205                                                      |
| 38   | 36     | 2      | 37    | 35      | 3       | 631.192590                               | -0.000205                                                      |
| 38   | 36     | 3      | 37    | 35      | 2       | 631.192590                               | -0.000205                                                      |
| 39   | 25     | 15     | 38    | 24      | 15      | 631.204770                               | -0.000455                                                      |
| 39   | 24     | 15     | 38    | 23      | 15      | 631.204770                               | -0.000452                                                      |
| 39   | 24     | 16     | 38    | 23      | 16      | 631.211560                               | -0.000221                                                      |
| 39   | 23     | 16     | 38    | 22      | 16      | 631.211560                               | -0.000221                                                      |
| 38   | 37     | 1      | 37    | 36      | 1       | 631.227740                               | -0.000162                                                      |
| 38   | 37     | 2      | 37    | 36      | 2       | 631.227740                               | -0.000162                                                      |
| 39   | 21     | 19     | 38    | 20      | 19      | 631.227740                               | -0.000040                                                      |
| 39   | 20     | 19     | 38    | 19      | 19      | 631.227740                               | -0.000040                                                      |
| 38   | 37     | 1      | 37    | 36      | 2       | 631.227740                               | -0.000162                                                      |
| 38   | 37     | 2      | 37    | 36      | 1       | 631.227740                               | -0.000162                                                      |
| 39   | 19     | 21     | 38    | 18      | 21      | 631.236570                               | -0.000370                                                      |
| 39   | 18     | 21     | 38    | 17      | 21      | 631.236570                               | -0.000370                                                      |
| 39   | 18     | 22     | 38    | 17      | 22      | 631.241930                               | 0.000621                                                       |
| 39   | 17     | 22     | 38    | 16      | 22      | 631.241930                               | 0.000621                                                       |
| 39   | 17     | 23     | 38    | 16      | 23      | 631.246480                               | 0.000853                                                       |
| 39   | 16     | 23     | 38    | 15      | 23      | 631.246480                               | 0.000853                                                       |
| 39   | 15     | 25     | 38    | 14      | 25      | 631.254110                               | -0.000081                                                      |
| 39   | 14     | 25     | 38    | 13      | 25      | 631.254110                               | -0.000081                                                      |
| 39   | 33     | 6      | 38    | 32      | 6       | 631.259020                               | 0.000322                                                       |
| 39   | 33     | 7      | 38    | 32      | 7       | 631.259020                               | -0.000406                                                      |
| 38   | 38     | 0      | 37    | 37      | 0       | 631.262900                               | -0.000059                                                      |

Continuation, see next page

Continuation of Table 28:  $\nu_{22} \leftarrow gs$  of dithiine.

| $J'$ | $K'_a$ | $K'_c$ | $J''$ | $K''_a$ | $K''_c$ | $\tilde{\nu}_{obs}$<br>/cm <sup>-1</sup> | $(\tilde{\nu}_{obs} - \tilde{\nu}_{cal})$<br>/cm <sup>-1</sup> |
|------|--------|--------|-------|---------|---------|------------------------------------------|----------------------------------------------------------------|
| 38   | 38     | 1      | 37    | 37      | 1       | 631.262900                               | -0.000059                                                      |
| 39   | 13     | 27     | 38    | 12      | 27      | 631.262900                               | 0.000046                                                       |
| 39   | 12     | 27     | 38    | 11      | 27      | 631.262900                               | 0.000046                                                       |
| 38   | 38     | 0      | 37    | 37      | 1       | 631.262900                               | -0.000059                                                      |
| 38   | 38     | 1      | 37    | 37      | 0       | 631.262900                               | -0.000059                                                      |
| 39   | 34     | 5      | 38    | 33      | 5       | 631.296490                               | 0.000051                                                       |
| 39   | 34     | 6      | 38    | 33      | 6       | 631.296490                               | -0.000010                                                      |
| 39   | 34     | 5      | 38    | 33      | 6       | 631.296490                               | -0.000097                                                      |
| 39   | 34     | 6      | 38    | 33      | 5       | 631.296490                               | 0.000138                                                       |
| 39   | 35     | 4      | 38    | 34      | 4       | 631.332480                               | -0.000083                                                      |
| 39   | 35     | 5      | 38    | 34      | 5       | 631.332480                               | -0.000087                                                      |
| 39   | 35     | 4      | 38    | 34      | 5       | 631.332480                               | -0.000092                                                      |
| 39   | 35     | 5      | 38    | 34      | 4       | 631.332480                               | -0.000079                                                      |
| 39   | 36     | 3      | 38    | 35      | 3       | 631.367940                               | -0.000014                                                      |
| 39   | 36     | 4      | 38    | 35      | 4       | 631.367940                               | -0.000015                                                      |
| 39   | 36     | 3      | 38    | 35      | 4       | 631.367940                               | -0.000015                                                      |
| 39   | 36     | 4      | 38    | 35      | 3       | 631.367940                               | -0.000014                                                      |
| 39   | 37     | 2      | 38    | 36      | 2       | 631.402840                               | -0.000151                                                      |
| 39   | 37     | 3      | 38    | 36      | 3       | 631.402840                               | -0.000151                                                      |
| 39   | 37     | 2      | 38    | 36      | 3       | 631.402840                               | -0.000151                                                      |
| 39   | 37     | 3      | 38    | 36      | 2       | 631.402840                               | -0.000151                                                      |
| 40   | 26     | 15     | 39    | 25      | 15      | 631.406700                               | -0.000158                                                      |
| 40   | 25     | 15     | 39    | 24      | 15      | 631.406700                               | -0.000151                                                      |
| 40   | 25     | 16     | 39    | 24      | 16      | 631.413630                               | -0.000152                                                      |
| 40   | 24     | 16     | 39    | 23      | 16      | 631.413630                               | -0.000151                                                      |
| 40   | 22     | 19     | 39    | 21      | 19      | 631.430450                               | 0.000000                                                       |
| 40   | 21     | 19     | 39    | 20      | 19      | 631.430450                               | 0.000000                                                       |
| 40   | 20     | 20     | 39    | 19      | 20      | 631.435120                               | -0.000129                                                      |
| 40   | 21     | 20     | 39    | 20      | 20      | 631.435120                               | -0.000129                                                      |
| 39   | 38     | 1      | 38    | 37      | 1       | 631.438080                               | 0.000215                                                       |
| 39   | 38     | 2      | 38    | 37      | 2       | 631.438080                               | 0.000215                                                       |
| 39   | 38     | 1      | 38    | 37      | 2       | 631.438080                               | 0.000215                                                       |
| 39   | 38     | 2      | 38    | 37      | 1       | 631.438080                               | 0.000215                                                       |
| 40   | 20     | 21     | 39    | 19      | 21      | 631.439990                               | 0.000143                                                       |
| 40   | 19     | 21     | 39    | 18      | 21      | 631.439990                               | 0.000143                                                       |
| 40   | 19     | 22     | 39    | 18      | 22      | 631.443960                               | -0.000357                                                      |
| 40   | 18     | 22     | 39    | 17      | 22      | 631.443960                               | -0.000357                                                      |
| 40   | 18     | 23     | 39    | 17      | 23      | 631.448960                               | 0.000263                                                       |
| 40   | 17     | 23     | 39    | 16      | 23      | 631.448960                               | 0.000263                                                       |
| 40   | 16     | 25     | 39    | 15      | 25      | 631.457170                               | -0.000194                                                      |
| 40   | 15     | 25     | 39    | 14      | 25      | 631.457170                               | -0.000194                                                      |
| 40   | 14     | 27     | 39    | 13      | 27      | 631.466140                               | 0.000052                                                       |
| 40   | 13     | 27     | 39    | 12      | 27      | 631.466140                               | 0.000052                                                       |
| 40   | 34     | 6      | 39    | 33      | 6       | 631.470420                               | 0.000123                                                       |
| 40   | 34     | 7      | 39    | 33      | 7       | 631.470420                               | -0.000307                                                      |
| 40   | 13     | 28     | 39    | 12      | 28      | 631.470420                               | -0.000098                                                      |

Continuation, see next page

Continuation of Table 28:  $\nu_{22} \leftarrow gs$  of dithiine.

| $J'$ | $K'_a$ | $K'_c$ | $J''$ | $K''_a$ | $K''_c$ | $\tilde{\nu}_{obs}$<br>/cm <sup>-1</sup> | $(\tilde{\nu}_{obs} - \tilde{\nu}_{cal})$<br>/cm <sup>-1</sup> |
|------|--------|--------|-------|---------|---------|------------------------------------------|----------------------------------------------------------------|
| 40   | 12     | 28     | 39    | 11      | 28      | 631.470420                               | -0.000098                                                      |
| 39   | 39     | 0      | 38    | 38      | 0       | 631.472850                               | 0.000157                                                       |
| 39   | 39     | 1      | 38    | 38      | 1       | 631.472850                               | 0.000157                                                       |
| 39   | 39     | 0      | 38    | 38      | 1       | 631.472850                               | 0.000157                                                       |
| 39   | 39     | 1      | 38    | 38      | 0       | 631.472850                               | 0.000157                                                       |
| 40   | 11     | 30     | 39    | 10      | 30      | 631.479330                               | -0.000270                                                      |
| 40   | 10     | 30     | 39    | 9       | 30      | 631.479330                               | -0.000270                                                      |
| 40   | 35     | 5      | 39    | 34      | 5       | 631.507300                               | -0.000055                                                      |
| 40   | 35     | 6      | 39    | 34      | 6       | 631.507300                               | -0.000089                                                      |
| 40   | 35     | 5      | 39    | 34      | 6       | 631.507300                               | -0.000137                                                      |
| 40   | 35     | 6      | 39    | 34      | 5       | 631.507300                               | -0.000007                                                      |
| 40   | 36     | 4      | 39    | 35      | 4       | 631.543080                               | -0.000011                                                      |
| 40   | 36     | 5      | 39    | 35      | 5       | 631.543080                               | -0.000013                                                      |
| 40   | 36     | 4      | 39    | 35      | 5       | 631.543080                               | -0.000015                                                      |
| 40   | 36     | 5      | 39    | 35      | 4       | 631.543080                               | -0.000008                                                      |
| 40   | 37     | 3      | 39    | 36      | 3       | 631.578130                               | -0.000050                                                      |
| 40   | 37     | 4      | 39    | 36      | 4       | 631.578130                               | -0.000051                                                      |
| 40   | 37     | 3      | 39    | 36      | 4       | 631.578130                               | -0.000051                                                      |
| 40   | 37     | 4      | 39    | 36      | 3       | 631.578130                               | -0.000050                                                      |
| 41   | 27     | 15     | 40    | 26      | 15      | 631.608490                               | 0.000226                                                       |
| 41   | 26     | 15     | 40    | 25      | 15      | 631.608490                               | 0.000240                                                       |
| 40   | 38     | 2      | 39    | 37      | 2       | 631.612890                               | -0.000066                                                      |
| 40   | 38     | 3      | 39    | 37      | 3       | 631.612890                               | -0.000066                                                      |
| 40   | 38     | 2      | 39    | 37      | 3       | 631.612890                               | -0.000066                                                      |
| 40   | 38     | 3      | 39    | 37      | 2       | 631.612890                               | -0.000066                                                      |
| 41   | 26     | 16     | 40    | 25      | 16      | 631.615390                               | -0.000190                                                      |
| 41   | 25     | 16     | 40    | 24      | 16      | 631.615390                               | -0.000189                                                      |
| 41   | 23     | 19     | 40    | 22      | 19      | 631.632780                               | -0.000179                                                      |
| 41   | 22     | 19     | 40    | 21      | 19      | 631.632780                               | -0.000179                                                      |
| 41   | 21     | 20     | 40    | 20      | 20      | 631.637690                               | -0.000217                                                      |
| 41   | 22     | 20     | 40    | 21      | 20      | 631.637690                               | -0.000217                                                      |
| 41   | 21     | 21     | 40    | 20      | 21      | 631.641870                               | -0.000748                                                      |
| 41   | 20     | 21     | 40    | 19      | 21      | 631.641870                               | -0.000748                                                      |
| 40   | 39     | 1      | 39    | 38      | 1       | 631.647220                               | -0.000361                                                      |
| 40   | 39     | 2      | 39    | 38      | 2       | 631.647220                               | -0.000361                                                      |
| 41   | 20     | 22     | 40    | 19      | 22      | 631.647220                               | 0.000037                                                       |
| 41   | 19     | 22     | 40    | 18      | 22      | 631.647220                               | 0.000037                                                       |
| 40   | 39     | 1      | 39    | 38      | 2       | 631.647220                               | -0.000361                                                      |
| 40   | 39     | 2      | 39    | 38      | 1       | 631.647220                               | -0.000361                                                      |
| 41   | 19     | 23     | 40    | 18      | 23      | 631.651580                               | -0.000059                                                      |
| 41   | 18     | 23     | 40    | 17      | 23      | 631.651580                               | -0.000059                                                      |
| 41   | 17     | 25     | 40    | 16      | 25      | 631.660410                               | -0.000002                                                      |
| 41   | 16     | 25     | 40    | 15      | 25      | 631.660410                               | -0.000002                                                      |
| 41   | 16     | 26     | 40    | 15      | 26      | 631.664760                               | -0.000028                                                      |
| 41   | 15     | 26     | 40    | 14      | 26      | 631.664760                               | -0.000028                                                      |
| 41   | 15     | 27     | 40    | 14      | 27      | 631.669030                               | -0.000158                                                      |

Continuation, see next page

Continuation of Table 28:  $\nu_{22} \leftarrow gs$  of dithiine.

| $J'$ | $K'_a$ | $K'_c$ | $J''$ | $K''_a$ | $K''_c$ | $\tilde{\nu}_{obs}$<br>/cm <sup>-1</sup> | $(\tilde{\nu}_{obs} - \tilde{\nu}_{cal})$<br>/cm <sup>-1</sup> |
|------|--------|--------|-------|---------|---------|------------------------------------------|----------------------------------------------------------------|
| 41   | 14     | 27     | 40    | 13      | 27      | 631.669030                               | -0.000158                                                      |
| 41   | 14     | 28     | 40    | 13      | 28      | 631.673700                               | 0.000063                                                       |
| 41   | 13     | 28     | 40    | 12      | 28      | 631.673700                               | 0.000063                                                       |
| 41   | 13     | 29     | 40    | 12      | 29      | 631.678090                               | -0.000060                                                      |
| 41   | 12     | 29     | 40    | 11      | 29      | 631.678090                               | -0.000060                                                      |
| 40   | 40     | 0      | 39    | 39      | 0       | 631.682270                               | 0.000089                                                       |
| 40   | 40     | 1      | 39    | 39      | 1       | 631.682270                               | 0.000089                                                       |
| 41   | 12     | 30     | 40    | 11      | 30      | 631.682270                               | -0.000462                                                      |
| 41   | 11     | 30     | 40    | 10      | 30      | 631.682270                               | -0.000462                                                      |
| 40   | 40     | 0      | 39    | 39      | 1       | 631.682270                               | 0.000089                                                       |
| 40   | 40     | 1      | 39    | 39      | 0       | 631.682270                               | 0.000089                                                       |
| 41   | 36     | 5      | 40    | 35      | 5       | 631.718060                               | 0.000023                                                       |
| 41   | 36     | 6      | 40    | 35      | 6       | 631.718060                               | 0.000004                                                       |
| 41   | 36     | 5      | 40    | 35      | 6       | 631.718060                               | -0.000023                                                      |
| 41   | 36     | 6      | 40    | 35      | 5       | 631.718060                               | 0.000049                                                       |
| 41   | 37     | 4      | 40    | 36      | 4       | 631.753270                               | -0.000115                                                      |
| 41   | 37     | 5      | 40    | 36      | 5       | 631.753270                               | -0.000116                                                      |
| 41   | 37     | 4      | 40    | 36      | 5       | 631.753270                               | -0.000117                                                      |
| 41   | 37     | 5      | 40    | 36      | 4       | 631.753270                               | -0.000113                                                      |
| 41   | 38     | 3      | 40    | 37      | 3       | 631.788740                               | 0.000556                                                       |
| 41   | 38     | 4      | 40    | 37      | 4       | 631.788740                               | 0.000556                                                       |
| 41   | 38     | 3      | 40    | 37      | 4       | 631.788740                               | 0.000556                                                       |
| 41   | 38     | 4      | 40    | 37      | 3       | 631.788740                               | 0.000556                                                       |
| 42   | 28     | 15     | 41    | 27      | 15      | 631.809500                               | 0.000056                                                       |
| 42   | 27     | 15     | 41    | 26      | 15      | 631.809500                               | 0.000082                                                       |
| 42   | 27     | 16     | 41    | 26      | 16      | 631.816860                               | -0.000325                                                      |
| 42   | 26     | 16     | 41    | 25      | 16      | 631.816860                               | -0.000323                                                      |
| 41   | 39     | 2      | 40    | 38      | 2       | 631.822810                               | 0.000129                                                       |
| 41   | 39     | 3      | 40    | 38      | 3       | 631.822810                               | 0.000129                                                       |
| 41   | 39     | 2      | 40    | 38      | 3       | 631.822810                               | 0.000129                                                       |
| 41   | 39     | 3      | 40    | 38      | 2       | 631.822810                               | 0.000129                                                       |
| 42   | 24     | 19     | 41    | 23      | 19      | 631.835130                               | -0.000194                                                      |
| 42   | 23     | 19     | 41    | 22      | 19      | 631.835130                               | -0.000194                                                      |
| 42   | 22     | 20     | 41    | 21      | 20      | 631.840390                               | -0.000029                                                      |
| 42   | 23     | 20     | 41    | 22      | 20      | 631.840390                               | -0.000029                                                      |
| 42   | 22     | 21     | 41    | 21      | 21      | 631.845030                               | -0.000229                                                      |
| 42   | 21     | 21     | 41    | 20      | 21      | 631.845030                               | -0.000229                                                      |
| 42   | 21     | 22     | 41    | 20      | 22      | 631.849650                               | -0.000265                                                      |
| 42   | 20     | 22     | 41    | 19      | 22      | 631.849650                               | -0.000265                                                      |
| 42   | 20     | 23     | 41    | 19      | 23      | 631.854180                               | -0.000274                                                      |
| 42   | 19     | 23     | 41    | 18      | 23      | 631.854180                               | -0.000274                                                      |
| 42   | 17     | 26     | 41    | 16      | 26      | 631.868000                               | 0.000248                                                       |
| 42   | 16     | 26     | 41    | 15      | 26      | 631.868000                               | 0.000248                                                       |
| 42   | 16     | 27     | 41    | 15      | 27      | 631.872130                               | -0.000059                                                      |
| 42   | 15     | 27     | 41    | 14      | 27      | 631.872130                               | -0.000059                                                      |
| 42   | 15     | 28     | 41    | 14      | 28      | 631.876630                               | -0.000019                                                      |

Continuation, see next page

Continuation of Table 28:  $\nu_{22} \leftarrow gs$  of dithiine.

| $J'$ | $K'_a$ | $K'_c$ | $J''$ | $K''_a$ | $K''_c$ | $\tilde{\nu}_{obs}$<br>/cm <sup>-1</sup> | $(\tilde{\nu}_{obs} - \tilde{\nu}_{cal})$<br>/cm <sup>-1</sup> |
|------|--------|--------|-------|---------|---------|------------------------------------------|----------------------------------------------------------------|
| 42   | 14     | 28     | 41    | 13      | 28      | 631.876630                               | -0.000019                                                      |
| 42   | 14     | 29     | 41    | 13      | 29      | 631.881190                               | 0.000015                                                       |
| 42   | 13     | 29     | 41    | 12      | 29      | 631.881190                               | 0.000015                                                       |
| 42   | 13     | 30     | 41    | 12      | 30      | 631.885950                               | 0.000190                                                       |
| 42   | 12     | 30     | 41    | 11      | 30      | 631.885950                               | 0.000190                                                       |
| 41   | 41     | 0      | 40    | 40      | 0       | 631.891630                               | 0.000196                                                       |
| 41   | 41     | 1      | 40    | 40      | 1       | 631.891630                               | 0.000196                                                       |
| 41   | 41     | 0      | 40    | 40      | 1       | 631.891630                               | 0.000196                                                       |
| 41   | 41     | 1      | 40    | 40      | 0       | 631.891630                               | 0.000196                                                       |
| 42   | 36     | 6      | 41    | 35      | 6       | 631.892740                               | 0.000208                                                       |
| 42   | 36     | 7      | 41    | 35      | 7       | 631.892740                               | 0.000062                                                       |
| 42   | 36     | 6      | 41    | 35      | 7       | 631.892740                               | -0.000162                                                      |
| 42   | 36     | 7      | 41    | 35      | 6       | 631.892740                               | 0.000431                                                       |
| 42   | 37     | 5      | 41    | 36      | 5       | 631.928670                               | 0.000185                                                       |
| 42   | 37     | 6      | 41    | 36      | 6       | 631.928670                               | 0.000175                                                       |
| 42   | 37     | 5      | 41    | 36      | 6       | 631.928670                               | 0.000160                                                       |
| 42   | 37     | 6      | 41    | 36      | 5       | 631.928670                               | 0.000200                                                       |
| 42   | 38     | 4      | 41    | 37      | 4       | 631.963070                               | -0.000397                                                      |
| 42   | 38     | 5      | 41    | 37      | 5       | 631.963070                               | -0.000397                                                      |
| 42   | 38     | 4      | 41    | 37      | 5       | 631.963070                               | -0.000398                                                      |
| 42   | 38     | 5      | 41    | 37      | 4       | 631.963070                               | -0.000396                                                      |
| 42   | 39     | 3      | 41    | 38      | 3       | 631.998020                               | 0.000058                                                       |
| 42   | 39     | 4      | 41    | 38      | 4       | 631.998020                               | 0.000058                                                       |
| 42   | 39     | 3      | 41    | 38      | 4       | 631.998020                               | 0.000058                                                       |
| 42   | 39     | 4      | 41    | 38      | 3       | 631.998020                               | 0.000058                                                       |
| 43   | 29     | 15     | 42    | 28      | 15      | 632.010260                               | -0.000139                                                      |
| 43   | 28     | 15     | 42    | 27      | 15      | 632.010260                               | -0.000087                                                      |
| 43   | 28     | 16     | 42    | 27      | 16      | 632.018340                               | -0.000262                                                      |
| 43   | 27     | 16     | 42    | 26      | 16      | 632.018340                               | -0.000258                                                      |
| 42   | 40     | 2      | 41    | 39      | 2       | 632.031950                               | -0.000239                                                      |
| 42   | 40     | 3      | 41    | 39      | 3       | 632.031950                               | -0.000239                                                      |
| 42   | 40     | 2      | 41    | 39      | 3       | 632.031950                               | -0.000239                                                      |
| 42   | 40     | 3      | 41    | 39      | 2       | 632.031950                               | -0.000239                                                      |
| 43   | 25     | 19     | 42    | 24      | 19      | 632.037320                               | -0.000217                                                      |
| 43   | 24     | 19     | 42    | 23      | 19      | 632.037320                               | -0.000217                                                      |
| 43   | 23     | 20     | 42    | 22      | 20      | 632.042820                               | 0.000024                                                       |
| 43   | 24     | 20     | 42    | 23      | 20      | 632.042820                               | 0.000024                                                       |
| 43   | 22     | 22     | 42    | 21      | 22      | 632.052250                               | -0.000275                                                      |
| 43   | 21     | 22     | 42    | 20      | 22      | 632.052250                               | -0.000275                                                      |
| 43   | 21     | 23     | 42    | 20      | 23      | 632.056820                               | -0.000330                                                      |
| 43   | 20     | 23     | 42    | 19      | 23      | 632.056820                               | -0.000330                                                      |
| 42   | 41     | 1      | 41    | 40      | 1       | 632.066100                               | -0.000213                                                      |
| 42   | 41     | 2      | 41    | 40      | 2       | 632.066100                               | -0.000213                                                      |
| 43   | 19     | 25     | 42    | 18      | 25      | 632.066100                               | -0.000052                                                      |
| 43   | 18     | 25     | 42    | 17      | 25      | 632.066100                               | -0.000052                                                      |
| 42   | 41     | 1      | 41    | 40      | 2       | 632.066100                               | -0.000213                                                      |

Continuation, see next page

Continuation of Table 28:  $\nu_{22} \leftarrow gs$  of dithiine.

| $J'$ | $K'_a$ | $K'_c$ | $J''$ | $K''_a$ | $K''_c$ | $\tilde{\nu}_{obs}$<br>/cm <sup>-1</sup> | $(\tilde{\nu}_{obs} - \tilde{\nu}_{cal})$<br>/cm <sup>-1</sup> |
|------|--------|--------|-------|---------|---------|------------------------------------------|----------------------------------------------------------------|
| 42   | 41     | 2      | 41    | 40      | 1       | 632.066100                               | -0.000213                                                      |
| 43   | 18     | 26     | 42    | 17      | 26      | 632.070530                               | -0.000083                                                      |
| 43   | 17     | 26     | 42    | 16      | 26      | 632.070530                               | -0.000083                                                      |
| 43   | 17     | 27     | 42    | 16      | 27      | 632.074570                               | -0.000507                                                      |
| 43   | 16     | 27     | 42    | 15      | 27      | 632.074570                               | -0.000507                                                      |
| 43   | 16     | 28     | 42    | 15      | 28      | 632.079620                               | 0.000055                                                       |
| 43   | 15     | 28     | 42    | 14      | 28      | 632.079620                               | 0.000055                                                       |
| 43   | 15     | 29     | 42    | 14      | 29      | 632.083770                               | -0.000325                                                      |
| 43   | 14     | 29     | 42    | 13      | 29      | 632.083770                               | -0.000325                                                      |
| 43   | 14     | 30     | 42    | 13      | 30      | 632.088280                               | -0.000415                                                      |
| 43   | 13     | 30     | 42    | 12      | 30      | 632.088280                               | -0.000415                                                      |
| 42   | 42     | 0      | 41    | 41      | 0       | 632.100410                               | -0.000031                                                      |
| 42   | 42     | 1      | 41    | 41      | 1       | 632.100410                               | -0.000031                                                      |
| 42   | 42     | 0      | 41    | 41      | 1       | 632.100410                               | -0.000031                                                      |
| 42   | 42     | 1      | 41    | 41      | 0       | 632.100410                               | -0.000031                                                      |
| 43   | 37     | 6      | 42    | 36      | 6       | 632.103100                               | -0.000139                                                      |
| 43   | 37     | 7      | 42    | 36      | 7       | 632.103100                               | -0.000223                                                      |
| 43   | 37     | 6      | 42    | 36      | 7       | 632.103100                               | -0.000350                                                      |
| 43   | 37     | 7      | 42    | 36      | 6       | 632.103100                               | -0.000012                                                      |
| 43   | 38     | 5      | 42    | 37      | 5       | 632.138880                               | 0.000172                                                       |
| 43   | 38     | 6      | 42    | 37      | 6       | 632.138880                               | 0.000167                                                       |
| 43   | 38     | 5      | 42    | 37      | 6       | 632.138880                               | 0.000159                                                       |
| 43   | 38     | 6      | 42    | 37      | 5       | 632.138880                               | 0.000180                                                       |
| 43   | 39     | 4      | 42    | 38      | 4       | 632.173020                               | -0.000320                                                      |
| 43   | 39     | 5      | 42    | 38      | 5       | 632.173020                               | -0.000320                                                      |
| 43   | 39     | 4      | 42    | 38      | 5       | 632.173020                               | -0.000321                                                      |
| 43   | 39     | 5      | 42    | 38      | 4       | 632.173020                               | -0.000320                                                      |
| 43   | 40     | 3      | 42    | 39      | 3       | 632.207100                               | -0.000421                                                      |
| 43   | 40     | 4      | 42    | 39      | 4       | 632.207100                               | -0.000421                                                      |
| 43   | 40     | 3      | 42    | 39      | 4       | 632.207100                               | -0.000421                                                      |
| 43   | 40     | 4      | 42    | 39      | 3       | 632.207100                               | -0.000421                                                      |
| 44   | 30     | 15     | 43    | 29      | 15      | 632.211230                               | 0.000104                                                       |
| 44   | 29     | 15     | 43    | 28      | 15      | 632.211230                               | 0.000201                                                       |
| 44   | 29     | 16     | 43    | 28      | 16      | 632.219700                               | -0.000122                                                      |
| 44   | 28     | 16     | 43    | 27      | 16      | 632.219700                               | -0.000114                                                      |
| 44   | 26     | 19     | 43    | 25      | 19      | 632.239830                               | 0.000205                                                       |
| 44   | 25     | 19     | 43    | 24      | 19      | 632.239830                               | 0.000205                                                       |
| 43   | 41     | 2      | 42    | 40      | 2       | 632.241300                               | -0.000171                                                      |
| 43   | 41     | 3      | 42    | 40      | 3       | 632.241300                               | -0.000171                                                      |
| 43   | 41     | 2      | 42    | 40      | 3       | 632.241300                               | -0.000171                                                      |
| 43   | 41     | 3      | 42    | 40      | 2       | 632.241300                               | -0.000171                                                      |
| 44   | 24     | 20     | 43    | 23      | 20      | 632.244940                               | -0.000113                                                      |
| 44   | 25     | 20     | 43    | 24      | 20      | 632.244940                               | -0.000113                                                      |
| 44   | 24     | 21     | 43    | 23      | 21      | 632.249310                               | -0.000843                                                      |
| 44   | 23     | 21     | 43    | 22      | 21      | 632.249310                               | -0.000843                                                      |
| 44   | 23     | 22     | 43    | 22      | 22      | 632.254880                               | -0.000144                                                      |

Continuation, see next page

Continuation of Table 28:  $\nu_{22} \leftarrow gs$  of dithiine.

| $J'$ | $K'_a$ | $K'_c$ | $J''$ | $K''_a$ | $K''_c$ | $\tilde{\nu}_{obs}$<br>/cm <sup>-1</sup> | $(\tilde{\nu}_{obs} - \tilde{\nu}_{cal})$<br>/cm <sup>-1</sup> |
|------|--------|--------|-------|---------|---------|------------------------------------------|----------------------------------------------------------------|
| 44   | 22     | 22     | 43    | 21      | 22      | 632.254880                               | -0.000144                                                      |
| 44   | 22     | 23     | 43    | 21      | 23      | 632.259620                               | -0.000114                                                      |
| 44   | 21     | 23     | 43    | 20      | 23      | 632.259620                               | -0.000114                                                      |
| 44   | 20     | 25     | 43    | 19      | 25      | 632.268970                               | 0.000096                                                       |
| 44   | 19     | 25     | 43    | 18      | 25      | 632.268970                               | 0.000096                                                       |
| 44   | 19     | 26     | 43    | 18      | 26      | 632.273780                               | 0.000408                                                       |
| 44   | 18     | 26     | 43    | 17      | 26      | 632.273780                               | 0.000408                                                       |
| 43   | 42     | 1      | 42    | 41      | 1       | 632.275400                               | 0.000057                                                       |
| 43   | 42     | 2      | 42    | 41      | 2       | 632.275400                               | 0.000057                                                       |
| 43   | 42     | 1      | 42    | 41      | 2       | 632.275400                               | 0.000057                                                       |
| 43   | 42     | 2      | 42    | 41      | 1       | 632.275400                               | 0.000057                                                       |
| 44   | 18     | 27     | 43    | 17      | 27      | 632.277730                               | -0.000133                                                      |
| 44   | 17     | 27     | 43    | 16      | 27      | 632.277730                               | -0.000133                                                      |
| 44   | 17     | 28     | 43    | 16      | 28      | 632.282120                               | -0.000257                                                      |
| 44   | 16     | 28     | 43    | 15      | 28      | 632.282120                               | -0.000257                                                      |
| 44   | 16     | 29     | 43    | 15      | 29      | 632.286710                               | -0.000221                                                      |
| 44   | 15     | 29     | 43    | 14      | 29      | 632.286710                               | -0.000221                                                      |
| 43   | 43     | 0      | 42    | 42      | 0       | 632.309200                               | -0.000025                                                      |
| 43   | 43     | 1      | 42    | 42      | 1       | 632.309200                               | -0.000025                                                      |
| 43   | 43     | 0      | 42    | 42      | 1       | 632.309200                               | -0.000025                                                      |
| 43   | 43     | 1      | 42    | 42      | 0       | 632.309200                               | -0.000025                                                      |
| 44   | 38     | 6      | 43    | 37      | 6       | 632.313340                               | -0.000365                                                      |
| 44   | 38     | 7      | 43    | 37      | 7       | 632.313340                               | -0.000412                                                      |
| 44   | 38     | 6      | 43    | 37      | 7       | 632.313340                               | -0.000484                                                      |
| 44   | 38     | 7      | 43    | 37      | 6       | 632.313340                               | -0.000293                                                      |
| 44   | 39     | 5      | 43    | 38      | 5       | 632.348820                               | 0.000106                                                       |
| 44   | 39     | 6      | 43    | 38      | 6       | 632.348820                               | 0.000102                                                       |
| 44   | 39     | 5      | 43    | 38      | 6       | 632.348820                               | 0.000098                                                       |
| 44   | 39     | 6      | 43    | 38      | 5       | 632.348820                               | 0.000110                                                       |
| 44   | 40     | 4      | 43    | 39      | 4       | 632.383100                               | 0.000102                                                       |
| 44   | 40     | 5      | 43    | 39      | 5       | 632.383100                               | 0.000102                                                       |
| 44   | 40     | 4      | 43    | 39      | 5       | 632.383100                               | 0.000102                                                       |
| 44   | 40     | 5      | 43    | 39      | 4       | 632.383100                               | 0.000102                                                       |
| 45   | 31     | 15     | 44    | 30      | 15      | 632.411250                               | -0.000392                                                      |
| 45   | 30     | 15     | 44    | 29      | 15      | 632.411250                               | -0.000214                                                      |
| 45   | 30     | 16     | 44    | 29      | 16      | 632.420870                               | 0.000006                                                       |
| 45   | 29     | 16     | 44    | 28      | 16      | 632.420870                               | 0.000022                                                       |
| 45   | 27     | 19     | 44    | 26      | 19      | 632.441650                               | 0.000078                                                       |
| 45   | 26     | 19     | 44    | 25      | 19      | 632.441650                               | 0.000078                                                       |
| 45   | 25     | 20     | 44    | 24      | 20      | 632.447000                               | -0.000183                                                      |
| 45   | 26     | 20     | 44    | 25      | 20      | 632.447000                               | -0.000183                                                      |
| 44   | 42     | 2      | 43    | 41      | 2       | 632.450460                               | -0.000079                                                      |
| 44   | 42     | 3      | 43    | 41      | 3       | 632.450460                               | -0.000079                                                      |
| 44   | 42     | 2      | 43    | 41      | 3       | 632.450460                               | -0.000079                                                      |
| 44   | 42     | 3      | 43    | 41      | 2       | 632.450460                               | -0.000079                                                      |
| 45   | 25     | 21     | 44    | 24      | 21      | 632.451950                               | -0.000479                                                      |

Continuation, see next page

Continuation of Table 28:  $\nu_{22} \leftarrow gs$  of dithiine.

| $J'$ | $K'_a$ | $K'_c$ | $J''$ | $K''_a$ | $K''_c$ | $\tilde{\nu}_{obs}$<br>/cm <sup>-1</sup> | $(\tilde{\nu}_{obs} - \tilde{\nu}_{cal})$<br>/cm <sup>-1</sup> |
|------|--------|--------|-------|---------|---------|------------------------------------------|----------------------------------------------------------------|
| 45   | 24     | 21     | 44    | 23      | 21      | 632.451950                               | -0.000479                                                      |
| 45   | 24     | 22     | 44    | 23      | 22      | 632.457330                               | -0.000086                                                      |
| 45   | 23     | 22     | 44    | 22      | 22      | 632.457330                               | -0.000086                                                      |
| 45   | 23     | 23     | 44    | 22      | 23      | 632.462230                               | 0.000004                                                       |
| 45   | 22     | 23     | 44    | 21      | 23      | 632.462230                               | 0.000004                                                       |
| 45   | 21     | 25     | 44    | 20      | 25      | 632.471230                               | -0.000263                                                      |
| 45   | 20     | 25     | 44    | 19      | 25      | 632.471230                               | -0.000263                                                      |
| 45   | 20     | 26     | 44    | 19      | 26      | 632.475930                               | -0.000111                                                      |
| 45   | 19     | 26     | 44    | 18      | 26      | 632.475930                               | -0.000111                                                      |
| 45   | 19     | 27     | 44    | 18      | 27      | 632.480120                               | -0.000451                                                      |
| 45   | 18     | 27     | 44    | 17      | 27      | 632.480120                               | -0.000451                                                      |
| 44   | 43     | 1      | 43    | 42      | 1       | 632.484520                               | 0.000370                                                       |
| 44   | 43     | 2      | 43    | 42      | 2       | 632.484520                               | 0.000370                                                       |
| 44   | 43     | 1      | 43    | 42      | 2       | 632.484520                               | 0.000370                                                       |
| 44   | 43     | 2      | 43    | 42      | 1       | 632.484520                               | 0.000370                                                       |
| 45   | 17     | 29     | 44    | 16      | 29      | 632.489100                               | -0.000571                                                      |
| 45   | 16     | 29     | 44    | 15      | 29      | 632.489100                               | -0.000571                                                      |
| 45   | 16     | 30     | 44    | 15      | 30      | 632.494000                               | -0.000285                                                      |
| 45   | 15     | 30     | 44    | 14      | 30      | 632.494000                               | -0.000285                                                      |
| 44   | 44     | 0      | 43    | 43      | 0       | 632.517870                               | 0.000086                                                       |
| 44   | 44     | 1      | 43    | 43      | 1       | 632.517870                               | 0.000086                                                       |
| 44   | 44     | 0      | 43    | 43      | 1       | 632.517870                               | 0.000086                                                       |
| 44   | 44     | 1      | 43    | 43      | 0       | 632.517870                               | 0.000086                                                       |
| 45   | 39     | 6      | 44    | 38      | 6       | 632.523780                               | -0.000165                                                      |
| 45   | 39     | 7      | 44    | 38      | 7       | 632.523780                               | -0.000192                                                      |
| 45   | 39     | 6      | 44    | 38      | 7       | 632.523780                               | -0.000232                                                      |
| 45   | 39     | 7      | 44    | 38      | 6       | 632.523780                               | -0.000125                                                      |
| 45   | 40     | 5      | 44    | 39      | 5       | 632.558650                               | 0.000125                                                       |
| 45   | 40     | 6      | 44    | 39      | 6       | 632.558650                               | 0.000124                                                       |
| 45   | 40     | 5      | 44    | 39      | 6       | 632.558650                               | 0.000121                                                       |
| 45   | 40     | 6      | 44    | 39      | 5       | 632.558650                               | 0.000128                                                       |
| 45   | 41     | 4      | 44    | 40      | 4       | 632.592550                               | 0.000103                                                       |
| 45   | 41     | 5      | 44    | 40      | 5       | 632.592550                               | 0.000103                                                       |
| 45   | 41     | 4      | 44    | 40      | 5       | 632.592550                               | 0.000103                                                       |
| 45   | 41     | 5      | 44    | 40      | 4       | 632.592550                               | 0.000103                                                       |
| 46   | 32     | 15     | 45    | 31      | 15      | 632.611920                               | -0.000032                                                      |
| 46   | 31     | 15     | 45    | 30      | 15      | 632.611920                               | 0.000290                                                       |
| 46   | 31     | 16     | 45    | 30      | 16      | 632.621310                               | -0.000403                                                      |
| 46   | 30     | 16     | 45    | 29      | 16      | 632.621310                               | -0.000372                                                      |
| 45   | 42     | 3      | 44    | 41      | 3       | 632.625690                               | -0.000325                                                      |
| 45   | 42     | 4      | 44    | 41      | 4       | 632.625690                               | -0.000325                                                      |
| 45   | 42     | 3      | 44    | 41      | 4       | 632.625690                               | -0.000325                                                      |
| 45   | 42     | 4      | 44    | 41      | 3       | 632.625690                               | -0.000325                                                      |
| 46   | 28     | 19     | 45    | 27      | 19      | 632.643220                               | -0.000190                                                      |
| 46   | 27     | 19     | 45    | 26      | 19      | 632.643220                               | -0.000190                                                      |
| 46   | 26     | 20     | 45    | 25      | 20      | 632.649250                               | 0.000046                                                       |

Continuation, see next page

Continuation of Table 28:  $\nu_{22} \leftarrow gs$  of dithiine.

| $J'$ | $K'_a$ | $K'_c$ | $J''$ | $K''_a$ | $K''_c$ | $\tilde{\nu}_{obs}$ | $(\tilde{\nu}_{obs} - \tilde{\nu}_{cal})$ |
|------|--------|--------|-------|---------|---------|---------------------|-------------------------------------------|
|      |        |        |       |         |         | /cm <sup>-1</sup>   | /cm <sup>-1</sup>                         |
| 46   | 27     | 20     | 45    | 26      | 20      | 632.649250          | 0.000046                                  |
| 46   | 26     | 21     | 45    | 25      | 21      | 632.654410          | -0.000192                                 |
| 46   | 25     | 21     | 45    | 24      | 21      | 632.654410          | -0.000192                                 |
| 45   | 43     | 2      | 44    | 42      | 2       | 632.659490          | 0.000091                                  |
| 45   | 43     | 3      | 44    | 42      | 3       | 632.659490          | 0.000091                                  |
| 46   | 25     | 22     | 45    | 24      | 22      | 632.659490          | -0.000224                                 |
| 46   | 24     | 22     | 45    | 23      | 22      | 632.659490          | -0.000224                                 |
| 45   | 43     | 2      | 44    | 42      | 3       | 632.659490          | 0.000091                                  |
| 45   | 43     | 3      | 44    | 42      | 2       | 632.659490          | 0.000091                                  |
| 46   | 24     | 23     | 45    | 23      | 23      | 632.664500          | -0.000114                                 |
| 46   | 23     | 23     | 45    | 22      | 23      | 632.664500          | -0.000114                                 |
| 46   | 22     | 25     | 45    | 21      | 25      | 632.673750          | -0.000274                                 |
| 46   | 21     | 25     | 45    | 20      | 25      | 632.673750          | -0.000274                                 |
| 46   | 21     | 26     | 45    | 20      | 26      | 632.678400          | -0.000228                                 |
| 46   | 20     | 26     | 45    | 19      | 26      | 632.678400          | -0.000228                                 |
| 46   | 20     | 27     | 45    | 19      | 27      | 632.683500          | 0.000310                                  |
| 46   | 19     | 27     | 45    | 18      | 27      | 632.683500          | 0.000310                                  |
| 46   | 19     | 28     | 45    | 18      | 28      | 632.687910          | 0.000147                                  |
| 46   | 18     | 28     | 45    | 17      | 28      | 632.687910          | 0.000147                                  |
| 45   | 44     | 1      | 44    | 43      | 1       | 632.692380          | -0.000356                                 |
| 45   | 44     | 2      | 44    | 43      | 2       | 632.692380          | -0.000356                                 |
| 46   | 18     | 29     | 45    | 17      | 29      | 632.692380          | 0.000035                                  |
| 46   | 17     | 29     | 45    | 16      | 29      | 632.692380          | 0.000035                                  |
| 45   | 44     | 1      | 44    | 43      | 2       | 632.692380          | -0.000356                                 |
| 45   | 44     | 2      | 44    | 43      | 1       | 632.692380          | -0.000356                                 |
| 46   | 17     | 30     | 45    | 16      | 30      | 632.696640          | -0.000329                                 |
| 46   | 16     | 30     | 45    | 15      | 30      | 632.696640          | -0.000329                                 |
| 46   | 39     | 7      | 45    | 38      | 7       | 632.698880          | 0.000156                                  |
| 46   | 39     | 8      | 45    | 38      | 8       | 632.698880          | -0.000032                                 |
| 46   | 15     | 32     | 45    | 14      | 32      | 632.706340          | -0.000056                                 |
| 46   | 14     | 32     | 45    | 13      | 32      | 632.706340          | -0.000056                                 |
| 45   | 45     | 0      | 44    | 44      | 0       | 632.726240          | 0.000125                                  |
| 45   | 45     | 1      | 44    | 44      | 1       | 632.726240          | 0.000125                                  |
| 45   | 45     | 0      | 44    | 44      | 1       | 632.726240          | 0.000125                                  |
| 45   | 45     | 1      | 44    | 44      | 0       | 632.726240          | 0.000125                                  |
| 46   | 40     | 6      | 45    | 39      | 6       | 632.733990          | 0.000019                                  |
| 46   | 40     | 7      | 45    | 39      | 7       | 632.733990          | 0.000004                                  |
| 46   | 40     | 6      | 45    | 39      | 7       | 632.733990          | -0.000018                                 |
| 46   | 40     | 7      | 45    | 39      | 6       | 632.733990          | 0.000042                                  |
| 46   | 41     | 5      | 45    | 40      | 5       | 632.768040          | -0.000088                                 |
| 46   | 41     | 6      | 45    | 40      | 6       | 632.768040          | -0.000089                                 |
| 46   | 41     | 5      | 45    | 40      | 6       | 632.768040          | -0.000090                                 |
| 46   | 41     | 6      | 45    | 40      | 5       | 632.768040          | -0.000087                                 |
| 46   | 42     | 4      | 45    | 41      | 4       | 632.801650          | -0.000042                                 |
| 46   | 42     | 5      | 45    | 41      | 5       | 632.801650          | -0.000042                                 |
| 46   | 42     | 4      | 45    | 41      | 5       | 632.801650          | -0.000042                                 |

Continuation, see next page

Continuation of Table 28:  $\nu_{22} \leftarrow gs$  of dithiine.

| $J'$ | $K'_a$ | $K'_c$ | $J''$ | $K''_a$ | $K''_c$ | $\tilde{\nu}_{obs}$<br>/cm <sup>-1</sup> | $(\tilde{\nu}_{obs} - \tilde{\nu}_{cal})$<br>/cm <sup>-1</sup> |
|------|--------|--------|-------|---------|---------|------------------------------------------|----------------------------------------------------------------|
| 46   | 42     | 5      | 45    | 41      | 4       | 632.801650                               | -0.000042                                                      |
| 47   | 33     | 15     | 46    | 32      | 15      | 632.811730                               | -0.000319                                                      |
| 47   | 32     | 15     | 46    | 31      | 15      | 632.811730                               | 0.000247                                                       |
| 47   | 32     | 16     | 46    | 31      | 16      | 632.822450                               | 0.000065                                                       |
| 47   | 31     | 16     | 46    | 30      | 16      | 632.822450                               | 0.000124                                                       |
| 46   | 43     | 3      | 45    | 42      | 3       | 632.834820                               | -0.000134                                                      |
| 46   | 43     | 4      | 45    | 42      | 4       | 632.834820                               | -0.000134                                                      |
| 46   | 43     | 3      | 45    | 42      | 4       | 632.834820                               | -0.000134                                                      |
| 46   | 43     | 4      | 45    | 42      | 3       | 632.834820                               | -0.000134                                                      |
| 47   | 29     | 19     | 46    | 28      | 19      | 632.845470                               | 0.000348                                                       |
| 47   | 28     | 19     | 46    | 27      | 19      | 632.845470                               | 0.000348                                                       |
| 47   | 27     | 20     | 46    | 26      | 20      | 632.850970                               | -0.000154                                                      |
| 47   | 28     | 20     | 46    | 27      | 20      | 632.850970                               | -0.000154                                                      |
| 47   | 27     | 21     | 46    | 26      | 21      | 632.856620                               | -0.000064                                                      |
| 47   | 26     | 21     | 46    | 25      | 21      | 632.856620                               | -0.000064                                                      |
| 47   | 26     | 22     | 46    | 25      | 22      | 632.861710                               | -0.000213                                                      |
| 47   | 25     | 22     | 46    | 24      | 22      | 632.861710                               | -0.000213                                                      |
| 47   | 25     | 23     | 46    | 24      | 23      | 632.866970                               | 0.000048                                                       |
| 47   | 24     | 23     | 46    | 23      | 23      | 632.866970                               | 0.000048                                                       |
| 46   | 44     | 2      | 45    | 43      | 2       | 632.868130                               | 0.000077                                                       |
| 46   | 44     | 3      | 45    | 43      | 3       | 632.868130                               | 0.000077                                                       |
| 46   | 44     | 2      | 45    | 43      | 3       | 632.868130                               | 0.000077                                                       |
| 46   | 44     | 3      | 45    | 43      | 2       | 632.868130                               | 0.000077                                                       |
| 47   | 23     | 25     | 46    | 22      | 25      | 632.876380                               | -0.000101                                                      |
| 47   | 22     | 25     | 46    | 21      | 25      | 632.876380                               | -0.000101                                                      |
| 47   | 22     | 26     | 46    | 21      | 26      | 632.881010                               | -0.000120                                                      |
| 47   | 21     | 26     | 46    | 20      | 26      | 632.881010                               | -0.000120                                                      |
| 47   | 21     | 27     | 46    | 20      | 27      | 632.885530                               | -0.000211                                                      |
| 47   | 20     | 27     | 46    | 19      | 27      | 632.885530                               | -0.000211                                                      |
| 47   | 19     | 29     | 46    | 18      | 29      | 632.894930                               | -0.000023                                                      |
| 47   | 18     | 29     | 46    | 17      | 29      | 632.894930                               | -0.000023                                                      |
| 47   | 18     | 30     | 46    | 17      | 30      | 632.899280                               | -0.000311                                                      |
| 47   | 17     | 30     | 46    | 16      | 30      | 632.899280                               | -0.000311                                                      |
| 46   | 45     | 1      | 45    | 44      | 1       | 632.900950                               | -0.000167                                                      |
| 46   | 45     | 2      | 45    | 44      | 2       | 632.900950                               | -0.000167                                                      |
| 46   | 45     | 1      | 45    | 44      | 2       | 632.900950                               | -0.000167                                                      |
| 46   | 45     | 2      | 45    | 44      | 1       | 632.900950                               | -0.000167                                                      |
| 47   | 40     | 7      | 46    | 39      | 7       | 632.909180                               | 0.000091                                                       |
| 47   | 40     | 8      | 46    | 39      | 8       | 632.909180                               | -0.000018                                                      |
| 47   | 16     | 32     | 46    | 15      | 32      | 632.909180                               | 0.000165                                                       |
| 47   | 15     | 32     | 46    | 14      | 32      | 632.909180                               | 0.000165                                                       |
| 46   | 46     | 0      | 45    | 45      | 0       | 632.934290                               | 0.000065                                                       |
| 46   | 46     | 1      | 45    | 45      | 1       | 632.934290                               | 0.000065                                                       |
| 46   | 46     | 0      | 45    | 45      | 1       | 632.934290                               | 0.000065                                                       |
| 46   | 46     | 1      | 45    | 45      | 0       | 632.934290                               | 0.000065                                                       |
| 47   | 41     | 6      | 46    | 40      | 6       | 632.944030                               | 0.000249                                                       |

Continuation, see next page

Continuation of Table 28:  $\nu_{22} \leftarrow gs$  of dithiine.

| $J'$ | $K'_a$ | $K'_c$ | $J''$ | $K''_a$ | $K''_c$ | $\tilde{\nu}_{obs}$<br>/cm <sup>-1</sup> | $(\tilde{\nu}_{obs} - \tilde{\nu}_{cal})$<br>/cm <sup>-1</sup> |
|------|--------|--------|-------|---------|---------|------------------------------------------|----------------------------------------------------------------|
| 47   | 41     | 7      | 46    | 40      | 7       | 632.944030                               | 0.000241                                                       |
| 47   | 41     | 6      | 46    | 40      | 7       | 632.944030                               | 0.000229                                                       |
| 47   | 41     | 7      | 46    | 40      | 6       | 632.944030                               | 0.000262                                                       |
| 47   | 42     | 5      | 46    | 41      | 5       | 632.977460                               | -0.000065                                                      |
| 47   | 42     | 6      | 46    | 41      | 6       | 632.977460                               | -0.000065                                                      |
| 47   | 42     | 5      | 46    | 41      | 6       | 632.977460                               | -0.000066                                                      |
| 47   | 42     | 6      | 46    | 41      | 5       | 632.977460                               | -0.000064                                                      |
| 47   | 43     | 4      | 46    | 42      | 4       | 633.010760                               | 0.000004                                                       |
| 47   | 43     | 5      | 46    | 42      | 5       | 633.010760                               | 0.000004                                                       |
| 47   | 43     | 4      | 46    | 42      | 5       | 633.010760                               | 0.000004                                                       |
| 47   | 43     | 5      | 46    | 42      | 4       | 633.010760                               | 0.000004                                                       |
| 48   | 34     | 15     | 47    | 33      | 15      | 633.012270                               | 0.000302                                                       |
| 48   | 33     | 16     | 47    | 32      | 16      | 633.022770                               | -0.000114                                                      |
| 48   | 32     | 16     | 47    | 31      | 16      | 633.022770                               | -0.000006                                                      |
| 47   | 44     | 3      | 46    | 43      | 3       | 633.043360                               | -0.000332                                                      |
| 47   | 44     | 4      | 46    | 43      | 4       | 633.043360                               | -0.000332                                                      |
| 47   | 44     | 3      | 46    | 43      | 4       | 633.043360                               | -0.000332                                                      |
| 47   | 44     | 4      | 46    | 43      | 3       | 633.043360                               | -0.000332                                                      |
| 48   | 30     | 19     | 47    | 29      | 19      | 633.046410                               | -0.000320                                                      |
| 48   | 29     | 19     | 47    | 28      | 19      | 633.046410                               | -0.000320                                                      |
| 48   | 28     | 20     | 47    | 27      | 20      | 633.053300                               | 0.000362                                                       |
| 48   | 29     | 20     | 47    | 28      | 20      | 633.053300                               | 0.000362                                                       |
| 48   | 28     | 21     | 47    | 27      | 21      | 633.058130                               | -0.000540                                                      |
| 48   | 27     | 21     | 47    | 26      | 21      | 633.058130                               | -0.000540                                                      |
| 48   | 27     | 22     | 47    | 26      | 22      | 633.063950                               | -0.000087                                                      |
| 48   | 26     | 22     | 47    | 25      | 22      | 633.063950                               | -0.000087                                                      |
| 48   | 26     | 23     | 47    | 25      | 23      | 633.069060                               | -0.000092                                                      |
| 48   | 25     | 23     | 47    | 24      | 23      | 633.069060                               | -0.000092                                                      |
| 47   | 45     | 2      | 46    | 44      | 2       | 633.076170                               | -0.000331                                                      |
| 47   | 45     | 3      | 46    | 44      | 3       | 633.076170                               | -0.000331                                                      |
| 47   | 45     | 2      | 46    | 44      | 3       | 633.076170                               | -0.000331                                                      |
| 47   | 45     | 3      | 46    | 44      | 2       | 633.076170                               | -0.000331                                                      |
| 48   | 24     | 25     | 47    | 23      | 25      | 633.079070                               | 0.000203                                                       |
| 48   | 23     | 25     | 47    | 22      | 25      | 633.079070                               | 0.000203                                                       |
| 48   | 23     | 26     | 47    | 22      | 26      | 633.083270                               | -0.000306                                                      |
| 48   | 22     | 26     | 47    | 21      | 26      | 633.083270                               | -0.000306                                                      |
| 48   | 22     | 27     | 47    | 21      | 27      | 633.088480                               | 0.000255                                                       |
| 48   | 21     | 27     | 47    | 20      | 27      | 633.088480                               | 0.000255                                                       |
| 48   | 21     | 28     | 47    | 20      | 28      | 633.093010                               | 0.000148                                                       |
| 48   | 20     | 28     | 47    | 19      | 28      | 633.093010                               | 0.000148                                                       |
| 48   | 20     | 29     | 47    | 19      | 29      | 633.097250                               | -0.000238                                                      |
| 48   | 19     | 29     | 47    | 18      | 29      | 633.097250                               | -0.000238                                                      |
| 48   | 19     | 30     | 47    | 18      | 30      | 633.102220                               | 0.000080                                                       |
| 48   | 18     | 30     | 47    | 17      | 30      | 633.102220                               | 0.000080                                                       |
| 47   | 46     | 1      | 46    | 45      | 1       | 633.109200                               | -0.000079                                                      |
| 47   | 46     | 2      | 46    | 45      | 2       | 633.109200                               | -0.000079                                                      |

Continuation, see next page

Continuation of Table 28:  $\nu_{22} \leftarrow gs$  of dithiine.

| $J'$ | $K'_a$ | $K'_c$ | $J''$ | $K''_a$ | $K''_c$ | $\tilde{\nu}_{obs}$<br>/cm <sup>-1</sup> | $(\tilde{\nu}_{obs} - \tilde{\nu}_{cal})$<br>/cm <sup>-1</sup> |
|------|--------|--------|-------|---------|---------|------------------------------------------|----------------------------------------------------------------|
| 47   | 46     | 1      | 46    | 45      | 2       | 633.109200                               | -0.000079                                                      |
| 47   | 46     | 2      | 46    | 45      | 1       | 633.109200                               | -0.000079                                                      |
| 48   | 17     | 32     | 47    | 16      | 32      | 633.111660                               | 0.000074                                                       |
| 48   | 16     | 32     | 47    | 15      | 32      | 633.111660                               | 0.000074                                                       |
| 47   | 47     | 0      | 46    | 46      | 0       | 633.141940                               | -0.000185                                                      |
| 47   | 47     | 1      | 46    | 46      | 1       | 633.141940                               | -0.000185                                                      |
| 47   | 47     | 0      | 46    | 46      | 1       | 633.141940                               | -0.000185                                                      |
| 47   | 47     | 1      | 46    | 46      | 0       | 633.141940                               | -0.000185                                                      |
| 48   | 42     | 6      | 47    | 41      | 6       | 633.153190                               | -0.000209                                                      |
| 48   | 42     | 7      | 47    | 41      | 7       | 633.153190                               | -0.000213                                                      |
| 48   | 42     | 6      | 47    | 41      | 7       | 633.153190                               | -0.000220                                                      |
| 48   | 42     | 7      | 47    | 41      | 6       | 633.153190                               | -0.000202                                                      |
| 48   | 43     | 5      | 47    | 42      | 5       | 633.186680                               | -0.000063                                                      |
| 48   | 43     | 6      | 47    | 42      | 6       | 633.186680                               | -0.000063                                                      |
| 48   | 43     | 5      | 47    | 42      | 6       | 633.186680                               | -0.000063                                                      |
| 48   | 43     | 6      | 47    | 42      | 5       | 633.186680                               | -0.000062                                                      |
| 49   | 35     | 15     | 48    | 34      | 15      | 633.211850                               | 0.000136                                                       |
| 48   | 44     | 4      | 47    | 43      | 4       | 633.219590                               | -0.000026                                                      |
| 48   | 44     | 5      | 47    | 43      | 5       | 633.219590                               | -0.000026                                                      |
| 48   | 44     | 4      | 47    | 43      | 5       | 633.219590                               | -0.000026                                                      |
| 48   | 44     | 5      | 47    | 43      | 4       | 633.219590                               | -0.000026                                                      |
| 49   | 34     | 16     | 48    | 33      | 16      | 633.223540                               | 0.000344                                                       |
| 49   | 33     | 16     | 48    | 32      | 16      | 633.223540                               | 0.000539                                                       |
| 49   | 31     | 19     | 48    | 30      | 19      | 633.247990                               | -0.000231                                                      |
| 49   | 30     | 19     | 48    | 29      | 19      | 633.247990                               | -0.000231                                                      |
| 48   | 45     | 3      | 47    | 44      | 3       | 633.251900                               | -0.000341                                                      |
| 48   | 45     | 4      | 47    | 44      | 4       | 633.251900                               | -0.000341                                                      |
| 48   | 45     | 3      | 47    | 44      | 4       | 633.251900                               | -0.000341                                                      |
| 48   | 45     | 4      | 47    | 44      | 3       | 633.251900                               | -0.000341                                                      |
| 49   | 29     | 20     | 48    | 28      | 20      | 633.254550                               | -0.000115                                                      |
| 49   | 30     | 20     | 48    | 29      | 20      | 633.254550                               | -0.000115                                                      |
| 49   | 29     | 21     | 48    | 28      | 21      | 633.260300                               | -0.000260                                                      |
| 49   | 28     | 21     | 48    | 27      | 21      | 633.260300                               | -0.000260                                                      |
| 49   | 28     | 22     | 48    | 27      | 22      | 633.265980                               | -0.000101                                                      |
| 49   | 27     | 22     | 48    | 26      | 22      | 633.265980                               | -0.000101                                                      |
| 49   | 27     | 23     | 48    | 26      | 23      | 633.271170                               | -0.000130                                                      |
| 49   | 26     | 23     | 48    | 25      | 23      | 633.271170                               | -0.000130                                                      |
| 49   | 25     | 25     | 48    | 24      | 25      | 633.281070                               | -0.000123                                                      |
| 49   | 24     | 25     | 48    | 23      | 25      | 633.281070                               | -0.000123                                                      |
| 48   | 46     | 2      | 47    | 45      | 2       | 633.284630                               | -0.000112                                                      |
| 48   | 46     | 3      | 47    | 45      | 3       | 633.284630                               | -0.000112                                                      |
| 48   | 46     | 2      | 47    | 45      | 3       | 633.284630                               | -0.000112                                                      |
| 48   | 46     | 3      | 47    | 45      | 2       | 633.284630                               | -0.000112                                                      |
| 49   | 24     | 26     | 48    | 23      | 26      | 633.286530                               | 0.000571                                                       |
| 49   | 23     | 26     | 48    | 22      | 26      | 633.286530                               | 0.000571                                                       |
| 49   | 23     | 27     | 48    | 22      | 27      | 633.290800                               | 0.000148                                                       |

Continuation, see next page

Continuation of Table 28:  $\nu_{22} \leftarrow gs$  of dithiine.

| $J'$ | $K'_a$ | $K'_c$ | $J''$ | $K''_a$ | $K''_c$ | $\tilde{\nu}_{obs}$<br>/cm <sup>-1</sup> | $(\tilde{\nu}_{obs} - \tilde{\nu}_{cal})$<br>/cm <sup>-1</sup> |
|------|--------|--------|-------|---------|---------|------------------------------------------|----------------------------------------------------------------|
| 49   | 22     | 27     | 48    | 21      | 27      | 633.290800                               | 0.000148                                                       |
| 49   | 22     | 28     | 48    | 21      | 28      | 633.294930                               | -0.000396                                                      |
| 49   | 21     | 28     | 48    | 20      | 28      | 633.294930                               | -0.000396                                                      |
| 49   | 21     | 29     | 48    | 20      | 29      | 633.300240                               | 0.000265                                                       |
| 49   | 20     | 29     | 48    | 19      | 29      | 633.300240                               | 0.000265                                                       |
| 49   | 20     | 30     | 48    | 19      | 30      | 633.304750                               | 0.000096                                                       |
| 49   | 19     | 30     | 48    | 18      | 30      | 633.304750                               | 0.000096                                                       |
| 49   | 19     | 31     | 48    | 18      | 31      | 633.309000                               | -0.000348                                                      |
| 49   | 18     | 31     | 48    | 17      | 31      | 633.309000                               | -0.000348                                                      |
| 49   | 18     | 32     | 48    | 17      | 32      | 633.313910                               | -0.000189                                                      |
| 49   | 17     | 32     | 48    | 16      | 32      | 633.313910                               | -0.000189                                                      |
| 48   | 47     | 1      | 47    | 46      | 1       | 633.317360                               | 0.000117                                                       |
| 48   | 47     | 2      | 47    | 46      | 2       | 633.317360                               | 0.000117                                                       |
| 48   | 47     | 1      | 47    | 46      | 2       | 633.317360                               | 0.000117                                                       |
| 48   | 47     | 2      | 47    | 46      | 1       | 633.317360                               | 0.000117                                                       |
| 49   | 42     | 7      | 48    | 41      | 7       | 633.328850                               | -0.000289                                                      |
| 49   | 42     | 8      | 48    | 41      | 8       | 633.328850                               | -0.000325                                                      |
| 49   | 42     | 7      | 48    | 41      | 8       | 633.328850                               | -0.000383                                                      |
| 49   | 42     | 8      | 48    | 41      | 7       | 633.328850                               | -0.000231                                                      |
| 48   | 48     | 0      | 47    | 47      | 0       | 633.349220                               | -0.000593                                                      |
| 48   | 48     | 1      | 47    | 47      | 1       | 633.349220                               | -0.000593                                                      |
| 48   | 48     | 0      | 47    | 47      | 1       | 633.349220                               | -0.000593                                                      |
| 48   | 48     | 1      | 47    | 47      | 0       | 633.349220                               | -0.000593                                                      |
| 49   | 43     | 6      | 48    | 42      | 6       | 633.362850                               | 0.000034                                                       |
| 49   | 43     | 7      | 48    | 42      | 7       | 633.362850                               | 0.000032                                                       |
| 49   | 43     | 6      | 48    | 42      | 7       | 633.362850                               | 0.000028                                                       |
| 49   | 43     | 7      | 48    | 42      | 6       | 633.362850                               | 0.000038                                                       |
| 49   | 44     | 5      | 48    | 43      | 5       | 633.395590                               | -0.000173                                                      |
| 49   | 44     | 6      | 48    | 43      | 6       | 633.395590                               | -0.000173                                                      |
| 49   | 44     | 5      | 48    | 43      | 6       | 633.395590                               | -0.000174                                                      |
| 49   | 44     | 6      | 48    | 43      | 5       | 633.395590                               | -0.000173                                                      |
| 50   | 36     | 15     | 49    | 35      | 15      | 633.411740                               | 0.000393                                                       |
| 50   | 35     | 16     | 49    | 34      | 16      | 633.424040                               | 0.000696                                                       |
| 49   | 45     | 4      | 48    | 44      | 4       | 633.428230                               | -0.000059                                                      |
| 49   | 45     | 5      | 48    | 44      | 5       | 633.428230                               | -0.000059                                                      |
| 49   | 45     | 4      | 48    | 44      | 5       | 633.428230                               | -0.000059                                                      |
| 49   | 45     | 5      | 48    | 44      | 4       | 633.428230                               | -0.000059                                                      |
| 50   | 32     | 19     | 49    | 31      | 19      | 633.449740                               | 0.000124                                                       |
| 50   | 31     | 19     | 49    | 30      | 19      | 633.449740                               | 0.000124                                                       |
| 50   | 30     | 20     | 49    | 29      | 20      | 633.456230                               | -0.000067                                                      |
| 50   | 31     | 20     | 49    | 30      | 20      | 633.456230                               | -0.000067                                                      |
| 49   | 46     | 3      | 48    | 45      | 3       | 633.460590                               | -0.000005                                                      |
| 49   | 46     | 4      | 48    | 45      | 4       | 633.460590                               | -0.000005                                                      |
| 49   | 46     | 3      | 48    | 45      | 4       | 633.460590                               | -0.000005                                                      |
| 49   | 46     | 4      | 48    | 45      | 3       | 633.460590                               | -0.000005                                                      |
| 50   | 30     | 21     | 49    | 29      | 21      | 633.462210                               | -0.000173                                                      |

Continuation, see next page

Continuation of Table 28:  $\nu_{22} \leftarrow gs$  of dithiine.

| $J'$ | $K'_a$ | $K'_c$ | $J''$ | $K''_a$ | $K''_c$ | $\tilde{\nu}_{obs}$ | $(\tilde{\nu}_{obs} - \tilde{\nu}_{cal})$ |
|------|--------|--------|-------|---------|---------|---------------------|-------------------------------------------|
|      |        |        |       |         |         | /cm <sup>-1</sup>   | /cm <sup>-1</sup>                         |
| 50   | 29     | 21     | 49    | 28      | 21      | 633.462210          | -0.000173                                 |
| 50   | 29     | 22     | 49    | 28      | 22      | 633.467510          | -0.000539                                 |
| 50   | 28     | 22     | 49    | 27      | 22      | 633.467510          | -0.000539                                 |
| 50   | 28     | 23     | 49    | 27      | 23      | 633.473570          | 0.000176                                  |
| 50   | 27     | 23     | 49    | 26      | 23      | 633.473570          | 0.000176                                  |
| 50   | 26     | 25     | 49    | 25      | 25      | 633.483960          | 0.000507                                  |
| 50   | 25     | 25     | 49    | 24      | 25      | 633.483960          | 0.000507                                  |
| 50   | 25     | 26     | 49    | 24      | 26      | 633.488390          | 0.000107                                  |
| 50   | 24     | 26     | 49    | 23      | 26      | 633.488390          | 0.000107                                  |
| 49   | 47     | 2      | 48    | 46      | 2       | 633.492840          | 0.000041                                  |
| 49   | 47     | 3      | 48    | 46      | 3       | 633.492840          | 0.000041                                  |
| 50   | 24     | 27     | 49    | 23      | 27      | 633.492840          | -0.000187                                 |
| 50   | 23     | 27     | 49    | 22      | 27      | 633.492840          | -0.000187                                 |
| 49   | 47     | 2      | 48    | 46      | 3       | 633.492840          | 0.000041                                  |
| 49   | 47     | 3      | 48    | 46      | 2       | 633.492840          | 0.000041                                  |
| 50   | 23     | 28     | 49    | 22      | 28      | 633.498250          | 0.000513                                  |
| 50   | 22     | 28     | 49    | 21      | 28      | 633.498250          | 0.000513                                  |
| 50   | 22     | 29     | 49    | 21      | 29      | 633.502490          | 0.000075                                  |
| 50   | 21     | 29     | 49    | 20      | 29      | 633.502490          | 0.000075                                  |
| 50   | 21     | 30     | 49    | 20      | 30      | 633.506530          | -0.000576                                 |
| 50   | 20     | 30     | 49    | 19      | 30      | 633.506530          | -0.000576                                 |
| 50   | 20     | 31     | 49    | 19      | 31      | 633.511740          | -0.000083                                 |
| 50   | 19     | 31     | 49    | 18      | 31      | 633.511740          | -0.000083                                 |
| 50   | 19     | 32     | 49    | 18      | 32      | 633.516600          | 0.000023                                  |
| 50   | 18     | 32     | 49    | 17      | 32      | 633.516600          | 0.000023                                  |
| 49   | 48     | 1      | 48    | 47      | 1       | 633.525050          | 0.000039                                  |
| 49   | 48     | 2      | 48    | 47      | 2       | 633.525050          | 0.000039                                  |
| 49   | 48     | 1      | 48    | 47      | 2       | 633.525050          | 0.000039                                  |
| 49   | 48     | 2      | 48    | 47      | 1       | 633.525050          | 0.000039                                  |
| 50   | 43     | 7      | 49    | 42      | 7       | 633.538950          | 0.000105                                  |
| 50   | 43     | 8      | 49    | 42      | 8       | 633.538950          | 0.000085                                  |
| 50   | 43     | 7      | 49    | 42      | 8       | 633.538950          | 0.000052                                  |
| 50   | 43     | 8      | 49    | 42      | 7       | 633.538950          | 0.000138                                  |
| 49   | 49     | 0      | 48    | 48      | 0       | 633.557060          | -0.000231                                 |
| 49   | 49     | 1      | 48    | 48      | 1       | 633.557060          | -0.000231                                 |
| 49   | 49     | 0      | 48    | 48      | 1       | 633.557060          | -0.000231                                 |
| 49   | 49     | 1      | 48    | 48      | 0       | 633.557060          | -0.000231                                 |
| 50   | 44     | 6      | 49    | 43      | 6       | 633.572110          | 0.000055                                  |
| 50   | 44     | 7      | 49    | 43      | 7       | 633.572110          | 0.000053                                  |
| 50   | 44     | 6      | 49    | 43      | 7       | 633.572110          | 0.000051                                  |
| 50   | 44     | 7      | 49    | 43      | 6       | 633.572110          | 0.000057                                  |
| 50   | 45     | 5      | 49    | 44      | 5       | 633.604740          | 0.000130                                  |
| 50   | 45     | 6      | 49    | 44      | 6       | 633.604740          | 0.000130                                  |
| 50   | 45     | 5      | 49    | 44      | 6       | 633.604740          | 0.000130                                  |
| 50   | 45     | 6      | 49    | 44      | 5       | 633.604740          | 0.000130                                  |
| 51   | 37     | 15     | 50    | 36      | 15      | 633.611200          | 0.000285                                  |

Continuation, see next page

Continuation of Table 28:  $\nu_{22} \leftarrow gs$  of dithiine.

| $J'$ | $K'_a$ | $K'_c$ | $J''$ | $K''_a$ | $K''_c$ | $\tilde{\nu}_{obs}$<br>/cm <sup>-1</sup> | $(\tilde{\nu}_{obs} - \tilde{\nu}_{cal})$<br>/cm <sup>-1</sup> |
|------|--------|--------|-------|---------|---------|------------------------------------------|----------------------------------------------------------------|
| 51   | 36     | 16     | 50    | 35      | 16      | 633.623600                               | 0.000276                                                       |
| 50   | 46     | 4      | 49    | 45      | 4       | 633.636580                               | -0.000205                                                      |
| 50   | 46     | 5      | 49    | 45      | 5       | 633.636580                               | -0.000205                                                      |
| 50   | 46     | 4      | 49    | 45      | 5       | 633.636580                               | -0.000205                                                      |
| 50   | 46     | 5      | 49    | 45      | 4       | 633.636580                               | -0.000205                                                      |
| 51   | 33     | 19     | 50    | 32      | 19      | 633.650670                               | -0.000246                                                      |
| 51   | 32     | 19     | 50    | 31      | 19      | 633.650670                               | -0.000245                                                      |
| 51   | 31     | 20     | 50    | 30      | 20      | 633.657840                               | 0.000002                                                       |
| 51   | 32     | 20     | 50    | 31      | 20      | 633.657840                               | 0.000002                                                       |
| 51   | 31     | 21     | 50    | 30      | 21      | 633.664530                               | 0.000402                                                       |
| 51   | 30     | 21     | 50    | 29      | 21      | 633.664530                               | 0.000402                                                       |
| 50   | 47     | 3      | 49    | 46      | 3       | 633.668440                               | -0.000320                                                      |
| 50   | 47     | 4      | 49    | 46      | 4       | 633.668440                               | -0.000320                                                      |
| 50   | 47     | 3      | 49    | 46      | 4       | 633.668440                               | -0.000320                                                      |
| 50   | 47     | 4      | 49    | 46      | 3       | 633.668440                               | -0.000320                                                      |
| 51   | 30     | 22     | 50    | 29      | 22      | 633.669760                               | -0.000179                                                      |
| 51   | 29     | 22     | 50    | 28      | 22      | 633.669760                               | -0.000179                                                      |
| 51   | 29     | 23     | 50    | 28      | 23      | 633.675120                               | -0.000296                                                      |
| 51   | 28     | 23     | 50    | 27      | 23      | 633.675120                               | -0.000296                                                      |
| 51   | 27     | 25     | 50    | 26      | 25      | 633.685730                               | 0.000069                                                       |
| 51   | 26     | 25     | 50    | 25      | 25      | 633.685730                               | 0.000069                                                       |
| 51   | 26     | 26     | 50    | 25      | 26      | 633.690810                               | 0.000261                                                       |
| 51   | 25     | 26     | 50    | 24      | 26      | 633.690810                               | 0.000261                                                       |
| 51   | 25     | 27     | 50    | 24      | 27      | 633.695410                               | 0.000056                                                       |
| 51   | 24     | 27     | 50    | 23      | 27      | 633.695410                               | 0.000056                                                       |
| 50   | 48     | 2      | 49    | 47      | 2       | 633.700340                               | -0.000324                                                      |
| 50   | 48     | 3      | 49    | 47      | 3       | 633.700340                               | -0.000324                                                      |
| 51   | 24     | 28     | 50    | 23      | 28      | 633.700340                               | 0.000240                                                       |
| 51   | 23     | 28     | 50    | 22      | 28      | 633.700340                               | 0.000240                                                       |
| 50   | 48     | 2      | 49    | 47      | 3       | 633.700340                               | -0.000324                                                      |
| 50   | 48     | 3      | 49    | 47      | 2       | 633.700340                               | -0.000324                                                      |
| 51   | 23     | 29     | 50    | 22      | 29      | 633.704660                               | -0.000153                                                      |
| 51   | 22     | 29     | 50    | 21      | 29      | 633.704660                               | -0.000153                                                      |
| 51   | 22     | 30     | 50    | 21      | 30      | 633.709750                               | 0.000218                                                       |
| 51   | 21     | 30     | 50    | 20      | 30      | 633.709750                               | 0.000218                                                       |
| 51   | 21     | 31     | 50    | 20      | 31      | 633.714490                               | 0.000235                                                       |
| 51   | 20     | 31     | 50    | 19      | 31      | 633.714490                               | 0.000235                                                       |
| 51   | 43     | 8      | 50    | 42      | 8       | 633.715000                               | 0.000448                                                       |
| 51   | 43     | 9      | 50    | 42      | 9       | 633.715000                               | 0.000310                                                       |
| 51   | 20     | 32     | 50    | 19      | 32      | 633.718950                               | -0.000062                                                      |
| 51   | 19     | 32     | 50    | 18      | 32      | 633.718950                               | -0.000062                                                      |
| 51   | 19     | 33     | 50    | 18      | 33      | 633.724050                               | 0.000225                                                       |
| 51   | 18     | 33     | 50    | 17      | 33      | 633.724050                               | 0.000225                                                       |
| 50   | 49     | 1      | 49    | 48      | 1       | 633.732540                               | -0.000033                                                      |
| 50   | 49     | 2      | 49    | 48      | 2       | 633.732540                               | -0.000033                                                      |
| 50   | 49     | 1      | 49    | 48      | 2       | 633.732540                               | -0.000033                                                      |

Continuation, see next page

Continuation of Table 28:  $\nu_{22} \leftarrow gs$  of dithiine.

| $J'$ | $K'_a$ | $K'_c$ | $J''$ | $K''_a$ | $K''_c$ | $\tilde{\nu}_{obs}$<br>/cm <sup>-1</sup> | $(\tilde{\nu}_{obs} - \tilde{\nu}_{cal})$<br>/cm <sup>-1</sup> |
|------|--------|--------|-------|---------|---------|------------------------------------------|----------------------------------------------------------------|
| 50   | 49     | 2      | 49    | 48      | 1       | 633.732540                               | -0.000033                                                      |
| 51   | 44     | 7      | 50    | 43      | 7       | 633.748550                               | 0.000200                                                       |
| 51   | 44     | 8      | 50    | 43      | 8       | 633.748550                               | 0.000189                                                       |
| 51   | 44     | 7      | 50    | 43      | 8       | 633.748550                               | 0.000170                                                       |
| 51   | 44     | 8      | 50    | 43      | 7       | 633.748550                               | 0.000219                                                       |
| 50   | 50     | 0      | 49    | 49      | 0       | 633.764330                               | -0.000244                                                      |
| 50   | 50     | 1      | 49    | 49      | 1       | 633.764330                               | -0.000244                                                      |
| 50   | 50     | 0      | 49    | 49      | 1       | 633.764330                               | -0.000244                                                      |
| 50   | 50     | 1      | 49    | 49      | 0       | 633.764330                               | -0.000244                                                      |
| 51   | 45     | 6      | 50    | 44      | 6       | 633.781270                               | 0.000167                                                       |
| 51   | 45     | 7      | 50    | 44      | 7       | 633.781270                               | 0.000167                                                       |
| 51   | 45     | 6      | 50    | 44      | 7       | 633.781270                               | 0.000165                                                       |
| 51   | 45     | 7      | 50    | 44      | 6       | 633.781270                               | 0.000168                                                       |
| 52   | 38     | 15     | 51    | 37      | 15      | 633.810860                               | 0.000361                                                       |
| 51   | 46     | 5      | 50    | 45      | 5       | 633.813100                               | -0.000170                                                      |
| 51   | 46     | 6      | 50    | 45      | 6       | 633.813100                               | -0.000170                                                      |
| 51   | 46     | 5      | 50    | 45      | 6       | 633.813100                               | -0.000170                                                      |
| 51   | 46     | 6      | 50    | 45      | 5       | 633.813100                               | -0.000170                                                      |
| 52   | 37     | 16     | 51    | 36      | 16      | 633.823500                               | 0.000357                                                       |
| 51   | 47     | 4      | 50    | 46      | 4       | 633.844970                               | -0.000127                                                      |
| 51   | 47     | 5      | 50    | 46      | 5       | 633.844970                               | -0.000127                                                      |
| 51   | 47     | 4      | 50    | 46      | 5       | 633.844970                               | -0.000127                                                      |
| 51   | 47     | 5      | 50    | 46      | 4       | 633.844970                               | -0.000127                                                      |
| 52   | 34     | 19     | 51    | 33      | 19      | 633.852110                               | 0.000001                                                       |
| 52   | 33     | 19     | 51    | 32      | 19      | 633.852110                               | 0.000001                                                       |
| 52   | 32     | 20     | 51    | 31      | 20      | 633.859220                               | -0.000077                                                      |
| 52   | 33     | 20     | 51    | 32      | 20      | 633.859220                               | -0.000077                                                      |
| 52   | 32     | 21     | 51    | 31      | 21      | 633.866240                               | 0.000450                                                       |
| 52   | 31     | 21     | 51    | 30      | 21      | 633.866240                               | 0.000450                                                       |
| 52   | 31     | 22     | 51    | 30      | 22      | 633.871610                               | -0.000165                                                      |
| 52   | 30     | 22     | 51    | 29      | 22      | 633.871610                               | -0.000165                                                      |
| 51   | 48     | 3      | 50    | 47      | 3       | 633.876860                               | 0.000109                                                       |
| 51   | 48     | 4      | 50    | 47      | 4       | 633.876860                               | 0.000109                                                       |
| 51   | 48     | 3      | 50    | 47      | 4       | 633.876860                               | 0.000109                                                       |
| 51   | 48     | 4      | 50    | 47      | 3       | 633.876860                               | 0.000109                                                       |
| 52   | 28     | 25     | 51    | 27      | 25      | 633.887910                               | 0.000094                                                       |
| 52   | 27     | 25     | 51    | 26      | 25      | 633.887910                               | 0.000094                                                       |
| 52   | 27     | 26     | 51    | 26      | 26      | 633.893220                               | 0.000434                                                       |
| 52   | 26     | 26     | 51    | 25      | 26      | 633.893220                               | 0.000434                                                       |
| 52   | 26     | 27     | 51    | 25      | 27      | 633.897970                               | 0.000329                                                       |
| 52   | 25     | 27     | 51    | 24      | 27      | 633.897970                               | 0.000329                                                       |
| 52   | 25     | 28     | 51    | 24      | 28      | 633.902380                               | -0.000045                                                      |
| 52   | 24     | 28     | 51    | 23      | 28      | 633.902380                               | -0.000045                                                      |
| 51   | 49     | 2      | 50    | 48      | 2       | 633.908240                               | -0.000097                                                      |
| 51   | 49     | 3      | 50    | 48      | 3       | 633.908240                               | -0.000097                                                      |
| 51   | 49     | 2      | 50    | 48      | 3       | 633.908240                               | -0.000097                                                      |

Continuation, see next page

Continuation of Table 28:  $\nu_{22} \leftarrow gs$  of dithiine.

| $J'$ | $K'_a$ | $K'_c$ | $J''$ | $K''_a$ | $K''_c$ | $\tilde{\nu}_{obs}$<br>/cm <sup>-1</sup> | $(\tilde{\nu}_{obs} - \tilde{\nu}_{cal})$<br>/cm <sup>-1</sup> |
|------|--------|--------|-------|---------|---------|------------------------------------------|----------------------------------------------------------------|
| 51   | 49     | 3      | 50    | 48      | 2       | 633.908240                               | -0.000097                                                      |
| 52   | 23     | 30     | 51    | 22      | 30      | 633.911790                               | -0.000118                                                      |
| 52   | 22     | 30     | 51    | 21      | 30      | 633.911790                               | -0.000118                                                      |
| 52   | 22     | 31     | 51    | 21      | 31      | 633.916370                               | -0.000281                                                      |
| 52   | 21     | 31     | 51    | 20      | 31      | 633.916370                               | -0.000281                                                      |
| 52   | 21     | 32     | 51    | 20      | 32      | 633.921640                               | 0.000219                                                       |
| 52   | 20     | 32     | 51    | 19      | 32      | 633.921640                               | 0.000219                                                       |
| 52   | 20     | 33     | 51    | 19      | 33      | 633.926480                               | 0.000245                                                       |
| 52   | 19     | 33     | 51    | 18      | 33      | 633.926480                               | 0.000245                                                       |
| 51   | 50     | 1      | 50    | 49      | 1       | 633.940470                               | 0.000517                                                       |
| 51   | 50     | 2      | 50    | 49      | 2       | 633.940470                               | 0.000517                                                       |
| 51   | 50     | 1      | 50    | 49      | 2       | 633.940470                               | 0.000517                                                       |
| 51   | 50     | 2      | 50    | 49      | 1       | 633.940470                               | 0.000517                                                       |
| 52   | 45     | 7      | 51    | 44      | 7       | 633.957860                               | 0.000185                                                       |
| 52   | 45     | 8      | 51    | 44      | 8       | 633.957860                               | 0.000179                                                       |
| 52   | 45     | 7      | 51    | 44      | 8       | 633.957860                               | 0.000168                                                       |
| 52   | 45     | 8      | 51    | 44      | 7       | 633.957860                               | 0.000195                                                       |
| 51   | 51     | 0      | 50    | 50      | 0       | 633.971760                               | 0.000096                                                       |
| 51   | 51     | 1      | 50    | 50      | 1       | 633.971760                               | 0.000096                                                       |
| 51   | 51     | 0      | 50    | 50      | 1       | 633.971760                               | 0.000096                                                       |
| 51   | 51     | 1      | 50    | 50      | 0       | 633.971760                               | 0.000096                                                       |
| 52   | 46     | 6      | 51    | 45      | 6       | 633.990120                               | 0.000135                                                       |
| 52   | 46     | 7      | 51    | 45      | 7       | 633.990120                               | 0.000135                                                       |
| 52   | 46     | 6      | 51    | 45      | 7       | 633.990120                               | 0.000134                                                       |
| 52   | 46     | 7      | 51    | 45      | 6       | 633.990120                               | 0.000136                                                       |
| 53   | 39     | 15     | 52    | 38      | 15      | 634.010230                               | 0.000026                                                       |
| 52   | 47     | 5      | 51    | 46      | 5       | 634.021680                               | -0.000084                                                      |
| 52   | 47     | 6      | 51    | 46      | 6       | 634.021680                               | -0.000084                                                      |
| 52   | 47     | 5      | 51    | 46      | 6       | 634.021680                               | -0.000085                                                      |
| 52   | 47     | 6      | 51    | 46      | 5       | 634.021680                               | -0.000084                                                      |
| 52   | 48     | 4      | 51    | 47      | 4       | 634.053250                               | 0.000016                                                       |
| 52   | 48     | 5      | 51    | 47      | 5       | 634.053250                               | 0.000016                                                       |
| 53   | 35     | 19     | 52    | 34      | 19      | 634.053250                               | 0.000039                                                       |
| 53   | 34     | 19     | 52    | 33      | 19      | 634.053250                               | 0.000041                                                       |
| 52   | 48     | 4      | 51    | 47      | 5       | 634.053250                               | 0.000016                                                       |
| 52   | 48     | 5      | 51    | 47      | 4       | 634.053250                               | 0.000016                                                       |
| 53   | 33     | 20     | 52    | 32      | 20      | 634.060650                               | -0.000038                                                      |
| 53   | 34     | 20     | 52    | 33      | 20      | 634.060650                               | -0.000038                                                      |
| 53   | 33     | 21     | 52    | 32      | 21      | 634.067450                               | 0.000050                                                       |
| 53   | 32     | 21     | 52    | 31      | 21      | 634.067450                               | 0.000050                                                       |
| 53   | 32     | 22     | 52    | 31      | 22      | 634.073460                               | -0.000087                                                      |
| 53   | 31     | 22     | 52    | 30      | 22      | 634.073460                               | -0.000087                                                      |
| 53   | 31     | 23     | 52    | 30      | 23      | 634.079160                               | -0.000134                                                      |
| 53   | 30     | 23     | 52    | 29      | 23      | 634.079160                               | -0.000134                                                      |
| 52   | 49     | 3      | 51    | 48      | 3       | 634.084700                               | 0.000140                                                       |
| 52   | 49     | 4      | 51    | 48      | 4       | 634.084700                               | 0.000140                                                       |

Continuation, see next page

Continuation of Table 28:  $\nu_{22} \leftarrow gs$  of dithiine.

| $J'$ | $K'_a$ | $K'_c$ | $J''$ | $K''_a$ | $K''_c$ | $\tilde{\nu}_{obs}$<br>/cm <sup>-1</sup> | $(\tilde{\nu}_{obs} - \tilde{\nu}_{cal})$<br>/cm <sup>-1</sup> |
|------|--------|--------|-------|---------|---------|------------------------------------------|----------------------------------------------------------------|
| 52   | 49     | 3      | 51    | 48      | 4       | 634.084700                               | 0.000140                                                       |
| 52   | 49     | 4      | 51    | 48      | 3       | 634.084700                               | 0.000140                                                       |
| 53   | 28     | 26     | 52    | 27      | 26      | 634.095010                               | 0.000036                                                       |
| 53   | 27     | 26     | 52    | 26      | 26      | 634.095010                               | 0.000036                                                       |
| 53   | 27     | 27     | 52    | 26      | 27      | 634.099800                               | -0.000084                                                      |
| 53   | 26     | 27     | 52    | 25      | 27      | 634.099800                               | -0.000084                                                      |
| 53   | 26     | 28     | 52    | 25      | 28      | 634.105160                               | 0.000443                                                       |
| 53   | 25     | 28     | 52    | 24      | 28      | 634.105160                               | 0.000443                                                       |
| 53   | 25     | 29     | 52    | 24      | 29      | 634.109580                               | 0.000078                                                       |
| 53   | 24     | 29     | 52    | 23      | 29      | 634.109580                               | 0.000078                                                       |
| 53   | 24     | 30     | 52    | 23      | 30      | 634.114280                               | 0.000018                                                       |
| 53   | 23     | 30     | 52    | 22      | 30      | 634.114280                               | 0.000018                                                       |
| 52   | 50     | 2      | 51    | 49      | 2       | 634.115710                               | -0.000121                                                      |
| 52   | 50     | 3      | 51    | 49      | 3       | 634.115710                               | -0.000121                                                      |
| 52   | 50     | 2      | 51    | 49      | 3       | 634.115710                               | -0.000121                                                      |
| 52   | 50     | 3      | 51    | 49      | 2       | 634.115710                               | -0.000121                                                      |
| 53   | 23     | 31     | 52    | 22      | 31      | 634.119200                               | 0.000174                                                       |
| 53   | 22     | 31     | 52    | 21      | 31      | 634.119200                               | 0.000174                                                       |
| 53   | 22     | 32     | 52    | 21      | 32      | 634.123990                               | 0.000180                                                       |
| 53   | 21     | 32     | 52    | 20      | 32      | 634.123990                               | 0.000180                                                       |
| 53   | 21     | 33     | 52    | 20      | 33      | 634.128650                               | 0.000034                                                       |
| 53   | 20     | 33     | 52    | 19      | 33      | 634.128650                               | 0.000034                                                       |
| 53   | 45     | 8      | 52    | 44      | 8       | 634.134090                               | -0.000027                                                      |
| 53   | 45     | 9      | 52    | 44      | 9       | 634.134090                               | -0.000073                                                      |
| 53   | 45     | 8      | 52    | 44      | 9       | 634.134090                               | -0.000153                                                      |
| 53   | 45     | 9      | 52    | 44      | 8       | 634.134090                               | 0.000054                                                       |
| 52   | 51     | 1      | 51    | 50      | 1       | 634.147150                               | 0.000013                                                       |
| 52   | 51     | 2      | 51    | 50      | 2       | 634.147150                               | 0.000013                                                       |
| 52   | 51     | 1      | 51    | 50      | 2       | 634.147150                               | 0.000013                                                       |
| 52   | 51     | 2      | 51    | 50      | 1       | 634.147150                               | 0.000013                                                       |
| 53   | 46     | 7      | 52    | 45      | 7       | 634.167030                               | 0.000220                                                       |
| 53   | 46     | 8      | 52    | 45      | 8       | 634.167030                               | 0.000217                                                       |
| 53   | 46     | 7      | 52    | 45      | 8       | 634.167030                               | 0.000211                                                       |
| 53   | 46     | 8      | 52    | 45      | 7       | 634.167030                               | 0.000226                                                       |
| 52   | 52     | 0      | 51    | 51      | 0       | 634.178490                               | -0.000070                                                      |
| 52   | 52     | 1      | 51    | 51      | 1       | 634.178490                               | -0.000070                                                      |
| 52   | 52     | 0      | 51    | 51      | 1       | 634.178490                               | -0.000070                                                      |
| 52   | 52     | 1      | 51    | 51      | 0       | 634.178490                               | -0.000070                                                      |
| 53   | 47     | 6      | 52    | 46      | 6       | 634.198890                               | 0.000211                                                       |
| 53   | 47     | 7      | 52    | 46      | 7       | 634.198890                               | 0.000211                                                       |
| 53   | 47     | 6      | 52    | 46      | 7       | 634.198890                               | 0.000210                                                       |
| 53   | 47     | 7      | 52    | 46      | 6       | 634.198890                               | 0.000211                                                       |
| 54   | 40     | 15     | 53    | 39      | 15      | 634.209730                               | -0.000419                                                      |
| 53   | 48     | 5      | 52    | 47      | 5       | 634.230090                               | 0.000009                                                       |
| 53   | 48     | 6      | 52    | 47      | 6       | 634.230090                               | 0.000009                                                       |
| 53   | 48     | 5      | 52    | 47      | 6       | 634.230090                               | 0.000009                                                       |

Continuation, see next page

Continuation of Table 28:  $\nu_{22} \leftarrow gs$  of dithiine.

| $J'$ | $K'_a$ | $K'_c$ | $J''$ | $K''_a$ | $K''_c$ | $\tilde{\nu}_{obs}$<br>/cm <sup>-1</sup> | $(\tilde{\nu}_{obs} - \tilde{\nu}_{cal})$<br>/cm <sup>-1</sup> |
|------|--------|--------|-------|---------|---------|------------------------------------------|----------------------------------------------------------------|
| 53   | 48     | 6      | 52    | 47      | 5       | 634.230090                               | 0.000009                                                       |
| 54   | 36     | 19     | 53    | 35      | 19      | 634.254310                               | 0.000091                                                       |
| 54   | 35     | 19     | 53    | 34      | 19      | 634.254310                               | 0.000094                                                       |
| 53   | 49     | 4      | 52    | 48      | 4       | 634.261040                               | -0.000156                                                      |
| 53   | 49     | 5      | 52    | 48      | 5       | 634.261040                               | -0.000156                                                      |
| 53   | 49     | 4      | 52    | 48      | 5       | 634.261040                               | -0.000156                                                      |
| 53   | 49     | 5      | 52    | 48      | 4       | 634.261040                               | -0.000156                                                      |
| 54   | 34     | 20     | 53    | 33      | 20      | 634.262210                               | 0.000219                                                       |
| 54   | 35     | 20     | 53    | 34      | 20      | 634.262210                               | 0.000219                                                       |
| 54   | 34     | 21     | 53    | 33      | 21      | 634.269090                               | 0.000161                                                       |
| 54   | 33     | 21     | 53    | 32      | 21      | 634.269090                               | 0.000161                                                       |
| 54   | 33     | 22     | 53    | 32      | 22      | 634.275440                               | 0.000176                                                       |
| 54   | 32     | 22     | 53    | 31      | 22      | 634.275440                               | 0.000176                                                       |
| 54   | 32     | 23     | 53    | 31      | 23      | 634.281410                               | 0.000258                                                       |
| 54   | 31     | 23     | 53    | 30      | 23      | 634.281410                               | 0.000258                                                       |
| 53   | 50     | 3      | 52    | 49      | 3       | 634.292310                               | 0.000119                                                       |
| 53   | 50     | 4      | 52    | 49      | 4       | 634.292310                               | 0.000119                                                       |
| 54   | 30     | 25     | 53    | 29      | 25      | 634.292310                               | 0.000302                                                       |
| 54   | 29     | 25     | 53    | 28      | 25      | 634.292310                               | 0.000302                                                       |
| 53   | 50     | 3      | 52    | 49      | 4       | 634.292310                               | 0.000119                                                       |
| 53   | 50     | 4      | 52    | 49      | 3       | 634.292310                               | 0.000119                                                       |
| 54   | 29     | 26     | 53    | 28      | 26      | 634.296880                               | -0.000236                                                      |
| 54   | 28     | 26     | 53    | 27      | 26      | 634.296880                               | -0.000236                                                      |
| 54   | 28     | 27     | 53    | 27      | 27      | 634.302810                               | 0.000713                                                       |
| 54   | 27     | 27     | 53    | 26      | 27      | 634.302810                               | 0.000713                                                       |
| 54   | 27     | 28     | 53    | 26      | 28      | 634.307440                               | 0.000457                                                       |
| 54   | 26     | 28     | 53    | 25      | 28      | 634.307440                               | 0.000457                                                       |
| 54   | 26     | 29     | 53    | 25      | 29      | 634.311860                               | 0.000057                                                       |
| 54   | 25     | 29     | 53    | 24      | 29      | 634.311860                               | 0.000057                                                       |
| 54   | 25     | 30     | 53    | 24      | 30      | 634.316770                               | 0.000171                                                       |
| 54   | 24     | 30     | 53    | 23      | 30      | 634.316770                               | 0.000171                                                       |
| 54   | 24     | 31     | 53    | 23      | 31      | 634.321640                               | 0.000260                                                       |
| 54   | 23     | 31     | 53    | 22      | 31      | 634.321640                               | 0.000260                                                       |
| 53   | 51     | 2      | 52    | 50      | 2       | 634.323100                               | -0.000040                                                      |
| 53   | 51     | 3      | 52    | 50      | 3       | 634.323100                               | -0.000040                                                      |
| 53   | 51     | 2      | 52    | 50      | 3       | 634.323100                               | -0.000040                                                      |
| 53   | 51     | 3      | 52    | 50      | 2       | 634.323100                               | -0.000040                                                      |
| 54   | 23     | 32     | 53    | 22      | 32      | 634.326460                               | 0.000293                                                       |
| 54   | 22     | 32     | 53    | 21      | 32      | 634.326460                               | 0.000293                                                       |
| 54   | 22     | 33     | 53    | 21      | 33      | 634.331220                               | 0.000235                                                       |
| 54   | 21     | 33     | 53    | 20      | 33      | 634.331220                               | 0.000235                                                       |
| 54   | 46     | 8      | 53    | 45      | 8       | 634.343600                               | 0.000009                                                       |
| 54   | 46     | 9      | 53    | 45      | 9       | 634.343600                               | -0.000018                                                      |
| 54   | 46     | 8      | 53    | 45      | 9       | 634.343600                               | -0.000064                                                      |
| 54   | 46     | 9      | 53    | 45      | 8       | 634.343600                               | 0.000055                                                       |
| 53   | 52     | 1      | 52    | 51      | 1       | 634.354110                               | -0.000031                                                      |

Continuation, see next page

Continuation of Table 28:  $\nu_{22} \leftarrow gs$  of dithiine.

| $J'$ | $K'_a$ | $K'_c$ | $J''$ | $K''_a$ | $K''_c$ | $\tilde{\nu}_{obs}$<br>/cm <sup>-1</sup> | $(\tilde{\nu}_{obs} - \tilde{\nu}_{cal})$<br>/cm <sup>-1</sup> |
|------|--------|--------|-------|---------|---------|------------------------------------------|----------------------------------------------------------------|
| 53   | 52     | 2      | 52    | 51      | 2       | 634.354110                               | -0.000031                                                      |
| 53   | 52     | 1      | 52    | 51      | 2       | 634.354110                               | -0.000031                                                      |
| 53   | 52     | 2      | 52    | 51      | 1       | 634.354110                               | -0.000031                                                      |
| 54   | 47     | 7      | 53    | 46      | 7       | 634.375910                               | 0.000149                                                       |
| 54   | 47     | 8      | 53    | 46      | 8       | 634.375910                               | 0.000147                                                       |
| 54   | 47     | 7      | 53    | 46      | 8       | 634.375910                               | 0.000143                                                       |
| 54   | 47     | 8      | 53    | 46      | 7       | 634.375910                               | 0.000152                                                       |
| 53   | 53     | 0      | 52    | 52      | 0       | 634.385090                               | -0.000169                                                      |
| 53   | 53     | 1      | 52    | 52      | 1       | 634.385090                               | -0.000169                                                      |
| 53   | 53     | 0      | 52    | 52      | 1       | 634.385090                               | -0.000169                                                      |
| 53   | 53     | 1      | 52    | 52      | 0       | 634.385090                               | -0.000169                                                      |
| 54   | 48     | 6      | 53    | 47      | 6       | 634.407500                               | 0.000284                                                       |
| 54   | 48     | 7      | 53    | 47      | 7       | 634.407500                               | 0.000284                                                       |
| 54   | 48     | 6      | 53    | 47      | 7       | 634.407500                               | 0.000284                                                       |
| 54   | 48     | 7      | 53    | 47      | 6       | 634.407500                               | 0.000284                                                       |
| 54   | 49     | 5      | 53    | 48      | 5       | 634.438140                               | -0.000087                                                      |
| 54   | 49     | 6      | 53    | 48      | 6       | 634.438140                               | -0.000087                                                      |
| 54   | 49     | 5      | 53    | 48      | 6       | 634.438140                               | -0.000087                                                      |
| 54   | 49     | 6      | 53    | 48      | 5       | 634.438140                               | -0.000087                                                      |
| 55   | 37     | 19     | 54    | 36      | 19      | 634.455310                               | 0.000181                                                       |
| 55   | 36     | 19     | 54    | 35      | 19      | 634.455310                               | 0.000188                                                       |
| 55   | 35     | 20     | 54    | 34      | 20      | 634.463250                               | 0.000036                                                       |
| 55   | 36     | 20     | 54    | 35      | 20      | 634.463250                               | 0.000035                                                       |
| 54   | 50     | 4      | 53    | 49      | 4       | 634.468960                               | -0.000030                                                      |
| 54   | 50     | 5      | 53    | 49      | 5       | 634.468960                               | -0.000030                                                      |
| 54   | 50     | 4      | 53    | 49      | 5       | 634.468960                               | -0.000030                                                      |
| 54   | 50     | 5      | 53    | 49      | 4       | 634.468960                               | -0.000030                                                      |
| 55   | 35     | 21     | 54    | 34      | 21      | 634.470400                               | 0.000005                                                       |
| 55   | 34     | 21     | 54    | 33      | 21      | 634.470400                               | 0.000005                                                       |
| 55   | 34     | 22     | 54    | 33      | 22      | 634.476950                               | 0.000027                                                       |
| 55   | 33     | 22     | 54    | 32      | 22      | 634.476950                               | 0.000027                                                       |
| 55   | 33     | 23     | 54    | 32      | 23      | 634.483100                               | 0.000137                                                       |
| 55   | 32     | 23     | 54    | 31      | 23      | 634.483100                               | 0.000137                                                       |
| 55   | 31     | 25     | 54    | 30      | 25      | 634.494700                               | 0.000663                                                       |
| 55   | 30     | 25     | 54    | 29      | 25      | 634.494700                               | 0.000663                                                       |
| 55   | 30     | 26     | 54    | 29      | 26      | 634.499270                               | 0.000033                                                       |
| 55   | 29     | 26     | 54    | 28      | 26      | 634.499270                               | 0.000033                                                       |
| 55   | 29     | 27     | 54    | 28      | 27      | 634.504240                               | -0.000038                                                      |
| 55   | 28     | 27     | 54    | 27      | 27      | 634.504240                               | -0.000038                                                      |
| 55   | 28     | 28     | 54    | 27      | 28      | 634.509380                               | 0.000163                                                       |
| 55   | 27     | 28     | 54    | 26      | 28      | 634.509380                               | 0.000163                                                       |
| 55   | 27     | 29     | 54    | 26      | 29      | 634.514350                               | 0.000271                                                       |
| 55   | 26     | 29     | 54    | 25      | 29      | 634.514350                               | 0.000271                                                       |
| 55   | 26     | 30     | 54    | 25      | 30      | 634.519040                               | 0.000134                                                       |
| 55   | 25     | 30     | 54    | 24      | 30      | 634.519040                               | 0.000134                                                       |
| 55   | 25     | 31     | 54    | 24      | 31      | 634.524010                               | 0.000308                                                       |

Continuation, see next page

Continuation of Table 28:  $\nu_{22} \leftarrow gs$  of dithiine.

| $J'$ | $K'_a$ | $K'_c$ | $J''$ | $K''_a$ | $K''_c$ | $\tilde{\nu}_{obs}$<br>/cm <sup>-1</sup> | $(\tilde{\nu}_{obs} - \tilde{\nu}_{cal})$<br>/cm <sup>-1</sup> |
|------|--------|--------|-------|---------|---------|------------------------------------------|----------------------------------------------------------------|
| 55   | 24     | 31     | 54    | 23      | 31      | 634.524010                               | 0.000308                                                       |
| 55   | 24     | 32     | 54    | 23      | 32      | 634.528680                               | 0.000170                                                       |
| 55   | 23     | 32     | 54    | 22      | 32      | 634.528680                               | 0.000170                                                       |
| 54   | 52     | 2      | 53    | 51      | 2       | 634.530110                               | -0.000164                                                      |
| 54   | 52     | 3      | 53    | 51      | 3       | 634.530110                               | -0.000164                                                      |
| 54   | 52     | 2      | 53    | 51      | 3       | 634.530110                               | -0.000164                                                      |
| 54   | 52     | 3      | 53    | 51      | 2       | 634.530110                               | -0.000164                                                      |
| 55   | 23     | 33     | 54    | 22      | 33      | 634.533610                               | 0.000270                                                       |
| 55   | 22     | 33     | 54    | 21      | 33      | 634.533610                               | 0.000270                                                       |
| 55   | 47     | 8      | 54    | 46      | 8       | 634.553290                               | 0.000418                                                       |
| 55   | 47     | 9      | 54    | 46      | 9       | 634.553290                               | 0.000403                                                       |
| 55   | 47     | 8      | 54    | 46      | 9       | 634.553290                               | 0.000376                                                       |
| 55   | 47     | 9      | 54    | 46      | 8       | 634.553290                               | 0.000444                                                       |
| 54   | 53     | 1      | 53    | 52      | 1       | 634.560970                               | 0.000003                                                       |
| 54   | 53     | 2      | 53    | 52      | 2       | 634.560970                               | 0.000003                                                       |
| 54   | 53     | 1      | 53    | 52      | 2       | 634.560970                               | 0.000003                                                       |
| 54   | 53     | 2      | 53    | 52      | 1       | 634.560970                               | 0.000003                                                       |
| 55   | 48     | 7      | 54    | 47      | 7       | 634.583970                               | -0.000576                                                      |
| 55   | 48     | 8      | 54    | 47      | 8       | 634.583970                               | -0.000578                                                      |
| 55   | 48     | 7      | 54    | 47      | 8       | 634.583970                               | -0.000579                                                      |
| 55   | 48     | 8      | 54    | 47      | 7       | 634.583970                               | -0.000575                                                      |
| 54   | 54     | 0      | 53    | 53      | 0       | 634.591670                               | -0.000107                                                      |
| 54   | 54     | 1      | 53    | 53      | 1       | 634.591670                               | -0.000107                                                      |
| 54   | 54     | 0      | 53    | 53      | 1       | 634.591670                               | -0.000107                                                      |
| 54   | 54     | 1      | 53    | 53      | 0       | 634.591670                               | -0.000107                                                      |
| 55   | 49     | 6      | 54    | 48      | 6       | 634.615420                               | -0.000153                                                      |
| 55   | 49     | 7      | 54    | 48      | 7       | 634.615420                               | -0.000153                                                      |
| 55   | 49     | 6      | 54    | 48      | 7       | 634.615420                               | -0.000153                                                      |
| 55   | 49     | 7      | 54    | 48      | 6       | 634.615420                               | -0.000153                                                      |
| 55   | 50     | 5      | 54    | 49      | 5       | 634.646370                               | 0.000165                                                       |
| 55   | 50     | 6      | 54    | 49      | 6       | 634.646370                               | 0.000165                                                       |
| 55   | 50     | 5      | 54    | 49      | 6       | 634.646370                               | 0.000165                                                       |
| 55   | 50     | 6      | 54    | 49      | 5       | 634.646370                               | 0.000165                                                       |
| 56   | 38     | 19     | 55    | 37      | 19      | 634.656180                               | 0.000250                                                       |
| 56   | 37     | 19     | 55    | 36      | 19      | 634.656180                               | 0.000262                                                       |
| 56   | 36     | 20     | 55    | 35      | 20      | 634.664400                               | 0.000045                                                       |
| 56   | 37     | 20     | 55    | 36      | 20      | 634.664400                               | 0.000044                                                       |
| 56   | 36     | 21     | 55    | 35      | 21      | 634.671780                               | -0.000024                                                      |
| 56   | 35     | 21     | 55    | 34      | 21      | 634.671780                               | -0.000024                                                      |
| 55   | 51     | 4      | 54    | 50      | 4       | 634.676740                               | 0.000118                                                       |
| 55   | 51     | 5      | 54    | 50      | 5       | 634.676740                               | 0.000118                                                       |
| 55   | 51     | 4      | 54    | 50      | 5       | 634.676740                               | 0.000118                                                       |
| 55   | 51     | 5      | 54    | 50      | 4       | 634.676740                               | 0.000118                                                       |
| 56   | 35     | 22     | 55    | 34      | 22      | 634.678780                               | 0.000253                                                       |
| 56   | 34     | 22     | 55    | 33      | 22      | 634.678780                               | 0.000253                                                       |
| 56   | 34     | 23     | 55    | 33      | 23      | 634.684830                               | 0.000102                                                       |

Continuation, see next page

Continuation of Table 28:  $\nu_{22} \leftarrow gs$  of dithiine.

| $J'$ | $K'_a$ | $K'_c$ | $J''$ | $K''_a$ | $K''_c$ | $\tilde{\nu}_{obs}$<br>/cm <sup>-1</sup> | $(\tilde{\nu}_{obs} - \tilde{\nu}_{cal})$<br>/cm <sup>-1</sup> |
|------|--------|--------|-------|---------|---------|------------------------------------------|----------------------------------------------------------------|
| 56   | 33     | 23     | 55    | 32      | 23      | 634.684830                               | 0.000102                                                       |
| 56   | 32     | 25     | 55    | 31      | 25      | 634.696140                               | 0.000107                                                       |
| 56   | 31     | 25     | 55    | 30      | 25      | 634.696140                               | 0.000107                                                       |
| 56   | 31     | 26     | 55    | 30      | 26      | 634.701510                               | 0.000192                                                       |
| 56   | 30     | 26     | 55    | 29      | 26      | 634.701510                               | 0.000192                                                       |
| 55   | 52     | 3      | 54    | 51      | 3       | 634.706790                               | -0.000148                                                      |
| 55   | 52     | 4      | 54    | 51      | 4       | 634.706790                               | -0.000148                                                      |
| 56   | 30     | 27     | 55    | 29      | 27      | 634.706790                               | 0.000357                                                       |
| 56   | 29     | 27     | 55    | 28      | 27      | 634.706790                               | 0.000357                                                       |
| 55   | 52     | 3      | 54    | 51      | 4       | 634.706790                               | -0.000148                                                      |
| 55   | 52     | 4      | 54    | 51      | 3       | 634.706790                               | -0.000148                                                      |
| 56   | 29     | 28     | 55    | 28      | 28      | 634.711420                               | 0.000000                                                       |
| 56   | 28     | 28     | 55    | 27      | 28      | 634.711420                               | 0.000000                                                       |
| 56   | 28     | 29     | 55    | 27      | 29      | 634.716680                               | 0.000352                                                       |
| 56   | 27     | 29     | 55    | 26      | 29      | 634.716680                               | 0.000352                                                       |
| 56   | 27     | 30     | 55    | 26      | 30      | 634.720910                               | -0.000276                                                      |
| 56   | 26     | 30     | 55    | 25      | 30      | 634.720910                               | -0.000276                                                      |
| 56   | 26     | 31     | 55    | 25      | 31      | 634.726240                               | 0.000225                                                       |
| 56   | 25     | 31     | 55    | 24      | 31      | 634.726240                               | 0.000225                                                       |
| 56   | 25     | 32     | 55    | 24      | 32      | 634.730800                               | -0.000041                                                      |
| 56   | 24     | 32     | 55    | 23      | 32      | 634.730800                               | -0.000041                                                      |
| 56   | 24     | 33     | 55    | 23      | 33      | 634.736020                               | 0.000350                                                       |
| 56   | 23     | 33     | 55    | 22      | 33      | 634.736020                               | 0.000350                                                       |
| 55   | 53     | 2      | 54    | 52      | 2       | 634.737290                               | 0.000050                                                       |
| 55   | 53     | 3      | 54    | 52      | 3       | 634.737290                               | 0.000050                                                       |
| 55   | 53     | 2      | 54    | 52      | 3       | 634.737290                               | 0.000050                                                       |
| 55   | 53     | 3      | 54    | 52      | 2       | 634.737290                               | 0.000050                                                       |
| 56   | 48     | 8      | 55    | 47      | 8       | 634.762300                               | 0.000338                                                       |
| 56   | 48     | 9      | 55    | 47      | 9       | 634.762300                               | 0.000330                                                       |
| 56   | 48     | 8      | 55    | 47      | 9       | 634.762300                               | 0.000315                                                       |
| 56   | 48     | 9      | 55    | 47      | 8       | 634.762300                               | 0.000353                                                       |
| 55   | 54     | 1      | 54    | 53      | 1       | 634.768000                               | 0.000382                                                       |
| 55   | 54     | 2      | 54    | 53      | 2       | 634.768000                               | 0.000382                                                       |
| 55   | 54     | 1      | 54    | 53      | 2       | 634.768000                               | 0.000382                                                       |
| 55   | 54     | 2      | 54    | 53      | 1       | 634.768000                               | 0.000382                                                       |
| 56   | 49     | 7      | 55    | 48      | 7       | 634.793160                               | -0.000006                                                      |
| 56   | 49     | 8      | 55    | 48      | 8       | 634.793160                               | -0.000007                                                      |
| 56   | 49     | 7      | 55    | 48      | 8       | 634.793160                               | -0.000008                                                      |
| 56   | 49     | 8      | 55    | 48      | 7       | 634.793160                               | -0.000005                                                      |
| 55   | 55     | 0      | 54    | 54      | 0       | 634.797980                               | -0.000133                                                      |
| 55   | 55     | 1      | 54    | 54      | 1       | 634.797980                               | -0.000133                                                      |
| 55   | 55     | 0      | 54    | 54      | 1       | 634.797980                               | -0.000133                                                      |
| 55   | 55     | 1      | 54    | 54      | 0       | 634.797980                               | -0.000133                                                      |
| 56   | 50     | 6      | 55    | 49      | 6       | 634.824010                               | 0.000234                                                       |
| 56   | 50     | 7      | 55    | 49      | 7       | 634.824010                               | 0.000234                                                       |
| 56   | 50     | 6      | 55    | 49      | 7       | 634.824010                               | 0.000234                                                       |

Continuation, see next page

Continuation of Table 28:  $\nu_{22} \leftarrow gs$  of dithiine.

| $J'$ | $K'_a$ | $K'_c$ | $J''$ | $K''_a$ | $K''_c$ | $\tilde{\nu}_{obs}$<br>/cm <sup>-1</sup> | $(\tilde{\nu}_{obs} - \tilde{\nu}_{cal})$<br>/cm <sup>-1</sup> |
|------|--------|--------|-------|---------|---------|------------------------------------------|----------------------------------------------------------------|
| 56   | 50     | 7      | 55    | 49      | 6       | 634.824010                               | 0.000234                                                       |
| 56   | 51     | 5      | 55    | 50      | 5       | 634.854140                               | 0.000114                                                       |
| 56   | 51     | 6      | 55    | 50      | 6       | 634.854140                               | 0.000114                                                       |
| 56   | 51     | 5      | 55    | 50      | 6       | 634.854140                               | 0.000114                                                       |
| 56   | 51     | 6      | 55    | 50      | 5       | 634.854140                               | 0.000114                                                       |
| 57   | 39     | 19     | 56    | 38      | 19      | 634.856600                               | -0.000027                                                      |
| 57   | 38     | 19     | 56    | 37      | 19      | 634.856600                               | -0.000004                                                      |
| 57   | 37     | 20     | 56    | 36      | 20      | 634.865730                               | 0.000315                                                       |
| 57   | 38     | 20     | 56    | 37      | 20      | 634.865730                               | 0.000313                                                       |
| 57   | 37     | 21     | 56    | 36      | 21      | 634.873130                               | -0.000004                                                      |
| 57   | 36     | 21     | 56    | 35      | 21      | 634.873130                               | -0.000004                                                      |
| 56   | 52     | 4      | 55    | 51      | 4       | 634.883970                               | -0.000106                                                      |
| 56   | 52     | 5      | 55    | 51      | 5       | 634.883970                               | -0.000106                                                      |
| 56   | 52     | 4      | 55    | 51      | 5       | 634.883970                               | -0.000106                                                      |
| 56   | 52     | 5      | 55    | 51      | 4       | 634.883970                               | -0.000106                                                      |
| 57   | 35     | 23     | 56    | 34      | 23      | 634.886580                               | 0.000138                                                       |
| 57   | 34     | 23     | 56    | 33      | 23      | 634.886580                               | 0.000138                                                       |
| 57   | 33     | 25     | 56    | 32      | 25      | 634.898070                               | 0.000070                                                       |
| 57   | 32     | 25     | 56    | 31      | 25      | 634.898070                               | 0.000070                                                       |
| 57   | 32     | 26     | 56    | 31      | 26      | 634.903670                               | 0.000305                                                       |
| 57   | 31     | 26     | 56    | 30      | 26      | 634.903670                               | 0.000305                                                       |
| 57   | 31     | 27     | 56    | 30      | 27      | 634.908750                               | 0.000201                                                       |
| 57   | 30     | 27     | 56    | 29      | 27      | 634.908750                               | 0.000201                                                       |
| 56   | 53     | 3      | 55    | 52      | 3       | 634.914030                               | -0.000027                                                      |
| 56   | 53     | 4      | 55    | 52      | 4       | 634.914030                               | -0.000027                                                      |
| 57   | 30     | 28     | 56    | 29      | 28      | 634.914030                               | 0.000424                                                       |
| 57   | 29     | 28     | 56    | 28      | 28      | 634.914030                               | 0.000424                                                       |
| 56   | 53     | 3      | 55    | 52      | 4       | 634.914030                               | -0.000027                                                      |
| 56   | 53     | 4      | 55    | 52      | 3       | 634.914030                               | -0.000027                                                      |
| 57   | 29     | 29     | 56    | 28      | 29      | 634.918590                               | 0.000026                                                       |
| 57   | 28     | 29     | 56    | 27      | 29      | 634.918590                               | 0.000026                                                       |
| 57   | 28     | 30     | 56    | 27      | 30      | 634.923340                               | -0.000112                                                      |
| 57   | 27     | 30     | 56    | 26      | 30      | 634.923340                               | -0.000112                                                      |
| 57   | 27     | 31     | 56    | 26      | 31      | 634.928070                               | -0.000242                                                      |
| 57   | 26     | 31     | 56    | 25      | 31      | 634.928070                               | -0.000242                                                      |
| 57   | 26     | 32     | 56    | 25      | 32      | 634.933410                               | 0.000259                                                       |
| 57   | 25     | 32     | 56    | 24      | 32      | 634.933410                               | 0.000259                                                       |
| 57   | 25     | 33     | 56    | 24      | 33      | 634.938270                               | 0.000270                                                       |
| 57   | 24     | 33     | 56    | 23      | 33      | 634.938270                               | 0.000270                                                       |
| 56   | 54     | 2      | 55    | 53      | 2       | 634.944150                               | 0.000112                                                       |
| 56   | 54     | 3      | 55    | 53      | 3       | 634.944150                               | 0.000112                                                       |
| 56   | 54     | 2      | 55    | 53      | 3       | 634.944150                               | 0.000112                                                       |
| 56   | 54     | 3      | 55    | 53      | 2       | 634.944150                               | 0.000112                                                       |
| 57   | 20     | 37     | 56    | 19      | 37      | 634.957720                               | -0.000044                                                      |
| 57   | 21     | 37     | 56    | 20      | 37      | 634.957720                               | -0.000044                                                      |
| 57   | 49     | 8      | 56    | 48      | 8       | 634.970970                               | 0.000091                                                       |

Continuation, see next page

Continuation of Table 28:  $\nu_{22} \leftarrow gs$  of dithiine.

| $J'$ | $K'_a$ | $K'_c$ | $J''$ | $K''_a$ | $K''_c$ | $\tilde{\nu}_{obs}$<br>/cm <sup>-1</sup> | $(\tilde{\nu}_{obs} - \tilde{\nu}_{cal})$<br>/cm <sup>-1</sup> |
|------|--------|--------|-------|---------|---------|------------------------------------------|----------------------------------------------------------------|
| 57   | 49     | 9      | 56    | 48      | 9       | 634.970970                               | 0.000086                                                       |
| 57   | 49     | 8      | 56    | 48      | 9       | 634.970970                               | 0.000078                                                       |
| 57   | 49     | 9      | 56    | 48      | 8       | 634.970970                               | 0.000099                                                       |
| 56   | 55     | 1      | 55    | 54      | 1       | 634.974340                               | 0.000255                                                       |
| 56   | 55     | 2      | 55    | 54      | 2       | 634.974340                               | 0.000255                                                       |
| 56   | 55     | 1      | 55    | 54      | 2       | 634.974340                               | 0.000255                                                       |
| 56   | 55     | 2      | 55    | 54      | 1       | 634.974340                               | 0.000255                                                       |
| 57   | 50     | 7      | 56    | 49      | 7       | 635.002120                               | 0.000516                                                       |
| 57   | 50     | 8      | 56    | 49      | 8       | 635.002120                               | 0.000516                                                       |
| 57   | 50     | 7      | 56    | 49      | 8       | 635.002120                               | 0.000515                                                       |
| 57   | 50     | 8      | 56    | 49      | 7       | 635.002120                               | 0.000516                                                       |
| 56   | 56     | 0      | 55    | 55      | 0       | 635.004360                               | 0.000085                                                       |
| 56   | 56     | 1      | 55    | 55      | 1       | 635.004360                               | 0.000085                                                       |
| 56   | 56     | 0      | 55    | 55      | 1       | 635.004360                               | 0.000085                                                       |
| 56   | 56     | 1      | 55    | 55      | 0       | 635.004360                               | 0.000085                                                       |
| 57   | 51     | 6      | 56    | 50      | 6       | 635.031850                               | 0.000048                                                       |
| 57   | 51     | 7      | 56    | 50      | 7       | 635.031850                               | 0.000048                                                       |
| 57   | 51     | 6      | 56    | 50      | 7       | 635.031850                               | 0.000048                                                       |
| 57   | 51     | 7      | 56    | 50      | 6       | 635.031850                               | 0.000048                                                       |
| 58   | 40     | 19     | 57    | 39      | 19      | 635.057460                               | 0.000243                                                       |
| 58   | 39     | 19     | 57    | 38      | 19      | 635.057460                               | 0.000285                                                       |
| 57   | 52     | 5      | 56    | 51      | 5       | 635.061860                               | 0.000179                                                       |
| 57   | 52     | 6      | 56    | 51      | 6       | 635.061860                               | 0.000179                                                       |
| 57   | 52     | 5      | 56    | 51      | 6       | 635.061860                               | 0.000179                                                       |
| 57   | 52     | 6      | 56    | 51      | 5       | 635.061860                               | 0.000179                                                       |
| 58   | 38     | 20     | 57    | 37      | 20      | 635.066630                               | 0.000236                                                       |
| 58   | 39     | 20     | 57    | 38      | 20      | 635.066630                               | 0.000232                                                       |
| 58   | 38     | 21     | 57    | 37      | 21      | 635.074780                               | 0.000381                                                       |
| 58   | 37     | 21     | 57    | 36      | 21      | 635.074780                               | 0.000381                                                       |
| 58   | 37     | 22     | 57    | 36      | 22      | 635.081420                               | -0.000145                                                      |
| 58   | 36     | 22     | 57    | 35      | 22      | 635.081420                               | -0.000145                                                      |
| 58   | 36     | 23     | 57    | 35      | 23      | 635.088020                               | -0.000091                                                      |
| 58   | 35     | 23     | 57    | 34      | 23      | 635.088020                               | -0.000091                                                      |
| 57   | 53     | 4      | 56    | 52      | 4       | 635.091530                               | 0.000149                                                       |
| 57   | 53     | 5      | 56    | 52      | 5       | 635.091530                               | 0.000149                                                       |
| 57   | 53     | 4      | 56    | 52      | 5       | 635.091530                               | 0.000149                                                       |
| 57   | 53     | 5      | 56    | 52      | 4       | 635.091530                               | 0.000149                                                       |
| 58   | 34     | 25     | 57    | 33      | 25      | 635.099830                               | -0.000091                                                      |
| 58   | 33     | 25     | 57    | 32      | 25      | 635.099830                               | -0.000091                                                      |
| 58   | 33     | 26     | 57    | 32      | 26      | 635.105490                               | 0.000107                                                       |
| 58   | 32     | 26     | 57    | 31      | 26      | 635.105490                               | 0.000107                                                       |
| 58   | 32     | 27     | 57    | 31      | 27      | 635.110830                               | 0.000179                                                       |
| 58   | 31     | 27     | 57    | 30      | 27      | 635.110830                               | 0.000179                                                       |
| 58   | 48     | 10     | 57    | 47      | 10      | 635.116200                               | 0.000135                                                       |
| 58   | 48     | 11     | 57    | 47      | 11      | 635.116200                               | -0.000202                                                      |
| 58   | 31     | 28     | 57    | 30      | 28      | 635.116200                               | 0.000440                                                       |

Continuation, see next page

Continuation of Table 28:  $\nu_{22} \leftarrow gs$  of dithiine.

| $J'$ | $K'_a$ | $K'_c$ | $J''$ | $K''_a$ | $K''_c$ | $\tilde{\nu}_{obs}$<br>/cm <sup>-1</sup> | $(\tilde{\nu}_{obs} - \tilde{\nu}_{cal})$<br>/cm <sup>-1</sup> |
|------|--------|--------|-------|---------|---------|------------------------------------------|----------------------------------------------------------------|
| 58   | 30     | 28     | 57    | 29      | 28      | 635.116200                               | 0.000440                                                       |
| 57   | 54     | 3      | 56    | 53      | 3       | 635.121000                               | -0.000014                                                      |
| 57   | 54     | 4      | 56    | 53      | 4       | 635.121000                               | -0.000014                                                      |
| 58   | 30     | 29     | 57    | 29      | 29      | 635.121000                               | 0.000231                                                       |
| 58   | 29     | 29     | 57    | 28      | 29      | 635.121000                               | 0.000231                                                       |
| 57   | 54     | 3      | 56    | 53      | 4       | 635.121000                               | -0.000014                                                      |
| 57   | 54     | 4      | 56    | 53      | 3       | 635.121000                               | -0.000014                                                      |
| 58   | 29     | 30     | 57    | 28      | 30      | 635.126030                               | 0.000335                                                       |
| 58   | 28     | 30     | 57    | 27      | 30      | 635.126030                               | 0.000335                                                       |
| 58   | 28     | 31     | 57    | 27      | 31      | 635.130850                               | 0.000266                                                       |
| 58   | 27     | 31     | 57    | 26      | 31      | 635.130850                               | 0.000266                                                       |
| 58   | 27     | 32     | 57    | 26      | 32      | 635.135420                               | -0.000031                                                      |
| 58   | 26     | 32     | 57    | 25      | 32      | 635.135420                               | -0.000031                                                      |
| 58   | 26     | 33     | 57    | 25      | 33      | 635.140600                               | 0.000287                                                       |
| 58   | 25     | 33     | 57    | 24      | 33      | 635.140600                               | 0.000287                                                       |
| 58   | 49     | 9      | 57    | 48      | 9       | 635.148800                               | 0.000247                                                       |
| 58   | 49     | 10     | 57    | 48      | 10      | 635.148800                               | 0.000214                                                       |
| 58   | 49     | 9      | 57    | 48      | 10      | 635.148800                               | 0.000151                                                       |
| 58   | 49     | 10     | 57    | 48      | 9       | 635.148800                               | 0.000310                                                       |
| 57   | 55     | 2      | 56    | 54      | 2       | 635.150700                               | 0.000038                                                       |
| 57   | 55     | 3      | 56    | 54      | 3       | 635.150700                               | 0.000038                                                       |
| 57   | 55     | 2      | 56    | 54      | 3       | 635.150700                               | 0.000038                                                       |
| 57   | 55     | 3      | 56    | 54      | 2       | 635.150700                               | 0.000038                                                       |
| 58   | 21     | 37     | 57    | 20      | 37      | 635.159490                               | -0.000577                                                      |
| 58   | 22     | 37     | 57    | 21      | 37      | 635.159490                               | -0.000577                                                      |
| 57   | 56     | 1      | 56    | 55      | 1       | 635.179960                               | -0.000424                                                      |
| 57   | 56     | 2      | 56    | 55      | 2       | 635.179960                               | -0.000424                                                      |
| 58   | 50     | 8      | 57    | 49      | 8       | 635.179960                               | 0.000348                                                       |
| 58   | 50     | 9      | 57    | 49      | 9       | 635.179960                               | 0.000345                                                       |
| 57   | 56     | 1      | 56    | 55      | 2       | 635.179960                               | -0.000424                                                      |
| 57   | 56     | 2      | 56    | 55      | 1       | 635.179960                               | -0.000424                                                      |
| 58   | 50     | 8      | 57    | 49      | 9       | 635.179960                               | 0.000341                                                       |
| 58   | 50     | 9      | 57    | 49      | 8       | 635.179960                               | 0.000353                                                       |
| 57   | 57     | 0      | 56    | 56      | 0       | 635.210030                               | -0.000232                                                      |
| 57   | 57     | 1      | 56    | 56      | 1       | 635.210030                               | -0.000232                                                      |
| 58   | 51     | 7      | 57    | 50      | 7       | 635.210030                               | 0.000136                                                       |
| 58   | 51     | 8      | 57    | 50      | 8       | 635.210030                               | 0.000136                                                       |
| 57   | 57     | 0      | 56    | 56      | 1       | 635.210030                               | -0.000232                                                      |
| 57   | 57     | 1      | 56    | 56      | 0       | 635.210030                               | -0.000232                                                      |
| 58   | 51     | 7      | 57    | 50      | 8       | 635.210030                               | 0.000135                                                       |
| 58   | 51     | 8      | 57    | 50      | 7       | 635.210030                               | 0.000136                                                       |
| 58   | 52     | 6      | 57    | 51      | 6       | 635.239830                               | 0.000146                                                       |
| 58   | 52     | 7      | 57    | 51      | 7       | 635.239830                               | 0.000146                                                       |
| 58   | 52     | 6      | 57    | 51      | 7       | 635.239830                               | 0.000146                                                       |
| 58   | 52     | 7      | 57    | 51      | 6       | 635.239830                               | 0.000146                                                       |
| 59   | 41     | 19     | 58    | 40      | 19      | 635.258020                               | 0.000324                                                       |

Continuation, see next page

Continuation of Table 28:  $\nu_{22} \leftarrow gs$  of dithiine.

| $J'$ | $K'_a$ | $K'_c$ | $J''$ | $K''_a$ | $K''_c$ | $\tilde{\nu}_{obs}$ | $(\tilde{\nu}_{obs} - \tilde{\nu}_{cal})$ |
|------|--------|--------|-------|---------|---------|---------------------|-------------------------------------------|
|      |        |        |       |         |         | /cm <sup>-1</sup>   | /cm <sup>-1</sup>                         |
| 59   | 40     | 19     | 58    | 39      | 19      | 635.258020          | 0.000399                                  |
| 59   | 39     | 20     | 58    | 38      | 20      | 635.267560          | 0.000294                                  |
| 59   | 40     | 20     | 58    | 39      | 20      | 635.267560          | 0.000287                                  |
| 58   | 53     | 5      | 57    | 52      | 5       | 635.269190          | 0.000016                                  |
| 58   | 53     | 6      | 57    | 52      | 6       | 635.269190          | 0.000016                                  |
| 58   | 53     | 5      | 57    | 52      | 6       | 635.269190          | 0.000016                                  |
| 58   | 53     | 6      | 57    | 52      | 5       | 635.269190          | 0.000016                                  |
| 59   | 39     | 21     | 58    | 38      | 21      | 635.275530          | -0.000059                                 |
| 59   | 38     | 21     | 58    | 37      | 21      | 635.275530          | -0.000058                                 |
| 59   | 38     | 22     | 58    | 37      | 22      | 635.283050          | 0.000055                                  |
| 59   | 37     | 22     | 58    | 36      | 22      | 635.283050          | 0.000055                                  |
| 59   | 37     | 23     | 58    | 36      | 23      | 635.289810          | 0.000078                                  |
| 59   | 36     | 23     | 58    | 35      | 23      | 635.289810          | 0.000078                                  |
| 58   | 54     | 4      | 57    | 53      | 4       | 635.298810          | 0.000293                                  |
| 58   | 54     | 5      | 57    | 53      | 5       | 635.298810          | 0.000293                                  |
| 58   | 54     | 4      | 57    | 53      | 5       | 635.298810          | 0.000293                                  |
| 58   | 54     | 5      | 57    | 53      | 4       | 635.298810          | 0.000293                                  |
| 59   | 35     | 25     | 58    | 34      | 25      | 635.301940          | 0.000133                                  |
| 59   | 34     | 25     | 58    | 33      | 25      | 635.301940          | 0.000133                                  |
| 59   | 34     | 26     | 58    | 33      | 26      | 635.307310          | -0.000058                                 |
| 59   | 33     | 26     | 58    | 32      | 26      | 635.307310          | -0.000058                                 |
| 59   | 33     | 27     | 58    | 32      | 27      | 635.312650          | -0.000066                                 |
| 59   | 32     | 27     | 58    | 31      | 27      | 635.312650          | -0.000066                                 |
| 59   | 32     | 28     | 58    | 31      | 28      | 635.318190          | 0.000294                                  |
| 59   | 31     | 28     | 58    | 30      | 28      | 635.318190          | 0.000294                                  |
| 59   | 31     | 29     | 58    | 30      | 29      | 635.323090          | 0.000132                                  |
| 59   | 30     | 29     | 58    | 29      | 29      | 635.323090          | 0.000132                                  |
| 59   | 49     | 10     | 58    | 48      | 10      | 635.326320          | 0.000444                                  |
| 59   | 49     | 11     | 58    | 48      | 11      | 635.326320          | 0.000242                                  |
| 59   | 49     | 10     | 58    | 48      | 11      | 635.326320          | -0.000169                                 |
| 58   | 55     | 3      | 57    | 54      | 3       | 635.327800          | -0.000012                                 |
| 58   | 55     | 4      | 57    | 54      | 4       | 635.327800          | -0.000012                                 |
| 59   | 30     | 30     | 58    | 29      | 30      | 635.327800          | -0.000133                                 |
| 59   | 29     | 30     | 58    | 28      | 30      | 635.327800          | -0.000133                                 |
| 58   | 55     | 3      | 57    | 54      | 4       | 635.327800          | -0.000012                                 |
| 58   | 55     | 4      | 57    | 54      | 3       | 635.327800          | -0.000012                                 |
| 59   | 29     | 31     | 58    | 28      | 31      | 635.333190          | 0.000344                                  |
| 59   | 28     | 31     | 58    | 27      | 31      | 635.333190          | 0.000344                                  |
| 59   | 28     | 32     | 58    | 27      | 32      | 635.338050          | 0.000315                                  |
| 59   | 27     | 32     | 58    | 26      | 32      | 635.338050          | 0.000315                                  |
| 59   | 27     | 33     | 58    | 26      | 33      | 635.342670          | 0.000055                                  |
| 59   | 26     | 33     | 58    | 25      | 33      | 635.342670          | 0.000055                                  |
| 58   | 56     | 2      | 57    | 55      | 2       | 635.357500          | 0.000383                                  |
| 58   | 56     | 3      | 57    | 55      | 3       | 635.357500          | 0.000383                                  |
| 59   | 50     | 9      | 58    | 49      | 9       | 635.357500          | -0.000136                                 |
| 59   | 50     | 10     | 58    | 49      | 10      | 635.357500          | -0.000155                                 |

Continuation, see next page

Continuation of Table 28:  $\nu_{22} \leftarrow gs$  of dithiine.

| $J'$ | $K'_a$ | $K'_c$ | $J''$ | $K''_a$ | $K''_c$ | $\tilde{\nu}_{obs}$<br>/cm <sup>-1</sup> | $(\tilde{\nu}_{obs} - \tilde{\nu}_{cal})$<br>/cm <sup>-1</sup> |
|------|--------|--------|-------|---------|---------|------------------------------------------|----------------------------------------------------------------|
| 58   | 56     | 2      | 57    | 55      | 3       | 635.357500                               | 0.000383                                                       |
| 58   | 56     | 3      | 57    | 55      | 2       | 635.357500                               | 0.000383                                                       |
| 59   | 50     | 9      | 58    | 49      | 10      | 635.357500                               | -0.000191                                                      |
| 59   | 50     | 10     | 58    | 49      | 9       | 635.357500                               | -0.000100                                                      |
| 59   | 22     | 37     | 58    | 21      | 37      | 635.362100                               | -0.000283                                                      |
| 59   | 23     | 37     | 58    | 22      | 37      | 635.362100                               | -0.000283                                                      |
| 58   | 57     | 1      | 57    | 56      | 1       | 635.386520                               | -0.000006                                                      |
| 58   | 57     | 2      | 57    | 56      | 2       | 635.386520                               | -0.000006                                                      |
| 58   | 57     | 1      | 57    | 56      | 2       | 635.386520                               | -0.000006                                                      |
| 58   | 57     | 2      | 57    | 56      | 1       | 635.386520                               | -0.000006                                                      |
| 59   | 51     | 8      | 58    | 50      | 8       | 635.388440                               | 0.000257                                                       |
| 59   | 51     | 9      | 58    | 50      | 9       | 635.388440                               | 0.000255                                                       |
| 59   | 51     | 8      | 58    | 50      | 9       | 635.388440                               | 0.000253                                                       |
| 59   | 51     | 9      | 58    | 50      | 8       | 635.388440                               | 0.000259                                                       |
| 58   | 58     | 0      | 57    | 57      | 0       | 635.416180                               | 0.000108                                                       |
| 58   | 58     | 1      | 57    | 57      | 1       | 635.416180                               | 0.000108                                                       |
| 58   | 58     | 0      | 57    | 57      | 1       | 635.416180                               | 0.000108                                                       |
| 58   | 58     | 1      | 57    | 57      | 0       | 635.416180                               | 0.000108                                                       |
| 59   | 52     | 7      | 58    | 51      | 7       | 635.418250                               | 0.000236                                                       |
| 59   | 52     | 8      | 58    | 51      | 8       | 635.418250                               | 0.000235                                                       |
| 59   | 52     | 7      | 58    | 51      | 8       | 635.418250                               | 0.000235                                                       |
| 59   | 52     | 8      | 58    | 51      | 7       | 635.418250                               | 0.000236                                                       |
| 59   | 53     | 6      | 58    | 52      | 6       | 635.447870                               | 0.000469                                                       |
| 59   | 53     | 7      | 58    | 52      | 7       | 635.447870                               | 0.000469                                                       |
| 59   | 53     | 6      | 58    | 52      | 7       | 635.447870                               | 0.000468                                                       |
| 59   | 53     | 7      | 58    | 52      | 6       | 635.447870                               | 0.000469                                                       |
| 60   | 42     | 19     | 59    | 41      | 19      | 635.458340                               | 0.000296                                                       |
| 60   | 41     | 19     | 59    | 40      | 19      | 635.458340                               | 0.000428                                                       |
| 60   | 40     | 20     | 59    | 39      | 20      | 635.468210                               | 0.000164                                                       |
| 60   | 41     | 20     | 59    | 40      | 20      | 635.468210                               | 0.000150                                                       |
| 59   | 54     | 5      | 58    | 53      | 5       | 635.476800                               | 0.000281                                                       |
| 59   | 54     | 6      | 58    | 53      | 6       | 635.476800                               | 0.000281                                                       |
| 60   | 40     | 21     | 59    | 39      | 21      | 635.476800                               | 0.000093                                                       |
| 60   | 39     | 21     | 59    | 38      | 21      | 635.476800                               | 0.000094                                                       |
| 59   | 54     | 5      | 58    | 53      | 6       | 635.476800                               | 0.000281                                                       |
| 59   | 54     | 6      | 58    | 53      | 5       | 635.476800                               | 0.000281                                                       |
| 60   | 39     | 22     | 59    | 38      | 22      | 635.484400                               | 0.000043                                                       |
| 60   | 38     | 22     | 59    | 37      | 22      | 635.484400                               | 0.000043                                                       |
| 60   | 38     | 23     | 59    | 37      | 23      | 635.491180                               | -0.000113                                                      |
| 60   | 37     | 23     | 59    | 36      | 23      | 635.491180                               | -0.000113                                                      |
| 60   | 36     | 25     | 59    | 35      | 25      | 635.503670                               | 0.000018                                                       |
| 60   | 35     | 25     | 59    | 34      | 25      | 635.503670                               | 0.000018                                                       |
| 59   | 55     | 4      | 58    | 54      | 4       | 635.505520                               | 0.000022                                                       |
| 59   | 55     | 5      | 58    | 54      | 5       | 635.505520                               | 0.000022                                                       |
| 59   | 55     | 4      | 58    | 54      | 5       | 635.505520                               | 0.000022                                                       |
| 59   | 55     | 5      | 58    | 54      | 4       | 635.505520                               | 0.000022                                                       |

Continuation, see next page

Continuation of Table 28:  $\nu_{22} \leftarrow gs$  of dithiine.

| $J'$ | $K'_a$ | $K'_c$ | $J''$ | $K''_a$ | $K''_c$ | $\tilde{\nu}_{obs}$<br>/cm <sup>-1</sup> | $(\tilde{\nu}_{obs} - \tilde{\nu}_{cal})$<br>/cm <sup>-1</sup> |
|------|--------|--------|-------|---------|---------|------------------------------------------|----------------------------------------------------------------|
| 60   | 35     | 26     | 59    | 34      | 26      | 635.509500                               | 0.000174                                                       |
| 60   | 34     | 26     | 59    | 33      | 26      | 635.509500                               | 0.000174                                                       |
| 60   | 34     | 27     | 59    | 33      | 27      | 635.514980                               | 0.000226                                                       |
| 60   | 33     | 27     | 59    | 32      | 27      | 635.514980                               | 0.000226                                                       |
| 60   | 33     | 28     | 59    | 32      | 28      | 635.519930                               | -0.000075                                                      |
| 60   | 32     | 28     | 59    | 31      | 28      | 635.519930                               | -0.000075                                                      |
| 60   | 32     | 29     | 59    | 31      | 29      | 635.524970                               | -0.000151                                                      |
| 60   | 31     | 29     | 59    | 30      | 29      | 635.524970                               | -0.000151                                                      |
| 60   | 31     | 30     | 59    | 30      | 30      | 635.530260                               | 0.000118                                                       |
| 60   | 30     | 30     | 59    | 29      | 30      | 635.530260                               | 0.000118                                                       |
| 60   | 50     | 10     | 59    | 49      | 10      | 635.535550                               | 0.000128                                                       |
| 60   | 50     | 11     | 59    | 49      | 11      | 635.535550                               | 0.000008                                                       |
| 60   | 30     | 31     | 59    | 29      | 31      | 635.535550                               | 0.000458                                                       |
| 60   | 29     | 31     | 59    | 28      | 31      | 635.535550                               | 0.000458                                                       |
| 60   | 50     | 10     | 59    | 49      | 11      | 635.535550                               | -0.000235                                                      |
| 60   | 29     | 32     | 59    | 28      | 32      | 635.540150                               | 0.000145                                                       |
| 60   | 28     | 32     | 59    | 27      | 32      | 635.540150                               | 0.000145                                                       |
| 60   | 28     | 33     | 59    | 27      | 33      | 635.545200                               | 0.000290                                                       |
| 60   | 27     | 33     | 59    | 26      | 33      | 635.545200                               | 0.000290                                                       |
| 59   | 57     | 2      | 58    | 56      | 2       | 635.563490                               | 0.000066                                                       |
| 59   | 57     | 3      | 58    | 56      | 3       | 635.563490                               | 0.000066                                                       |
| 59   | 57     | 2      | 58    | 56      | 3       | 635.563490                               | 0.000066                                                       |
| 59   | 57     | 3      | 58    | 56      | 2       | 635.563490                               | 0.000066                                                       |
| 60   | 51     | 9      | 59    | 50      | 9       | 635.566950                               | 0.000416                                                       |
| 60   | 51     | 10     | 59    | 50      | 10      | 635.566950                               | 0.000405                                                       |
| 60   | 51     | 9      | 59    | 50      | 10      | 635.566950                               | 0.000384                                                       |
| 60   | 51     | 10     | 59    | 50      | 9       | 635.566950                               | 0.000436                                                       |
| 60   | 19     | 41     | 59    | 18      | 41      | 635.585340                               | -0.000037                                                      |
| 60   | 20     | 41     | 59    | 19      | 41      | 635.585340                               | -0.000037                                                      |
| 59   | 58     | 1      | 58    | 57      | 1       | 635.592470                               | -0.000019                                                      |
| 59   | 58     | 2      | 58    | 57      | 2       | 635.592470                               | -0.000019                                                      |
| 59   | 58     | 1      | 58    | 57      | 2       | 635.592470                               | -0.000019                                                      |
| 59   | 58     | 2      | 58    | 57      | 1       | 635.592470                               | -0.000019                                                      |
| 60   | 52     | 8      | 59    | 51      | 8       | 635.596530                               | -0.000051                                                      |
| 60   | 52     | 9      | 59    | 51      | 9       | 635.596530                               | -0.000051                                                      |
| 60   | 52     | 8      | 59    | 51      | 9       | 635.596530                               | -0.000053                                                      |
| 60   | 52     | 9      | 59    | 51      | 8       | 635.596530                               | -0.000049                                                      |
| 59   | 59     | 0      | 58    | 58      | 0       | 635.621560                               | -0.000158                                                      |
| 59   | 59     | 1      | 58    | 58      | 1       | 635.621560                               | -0.000158                                                      |
| 59   | 59     | 0      | 58    | 58      | 1       | 635.621560                               | -0.000158                                                      |
| 59   | 59     | 1      | 58    | 58      | 0       | 635.621560                               | -0.000158                                                      |
| 60   | 53     | 7      | 59    | 52      | 7       | 635.626130                               | 0.000160                                                       |
| 60   | 53     | 8      | 59    | 52      | 8       | 635.626130                               | 0.000160                                                       |
| 60   | 53     | 7      | 59    | 52      | 8       | 635.626130                               | 0.000160                                                       |
| 60   | 53     | 8      | 59    | 52      | 7       | 635.626130                               | 0.000160                                                       |
| 60   | 54     | 6      | 59    | 53      | 6       | 635.655220                               | 0.000262                                                       |

Continuation, see next page

Continuation of Table 28:  $\nu_{22} \leftarrow gs$  of dithiine.

| $J'$ | $K'_a$ | $K'_c$ | $J''$ | $K''_a$ | $K''_c$ | $\tilde{\nu}_{obs}$<br>/cm <sup>-1</sup> | $(\tilde{\nu}_{obs} - \tilde{\nu}_{cal})$<br>/cm <sup>-1</sup> |
|------|--------|--------|-------|---------|---------|------------------------------------------|----------------------------------------------------------------|
| 60   | 54     | 7      | 59    | 53      | 7       | 635.655220                               | 0.000262                                                       |
| 60   | 54     | 6      | 59    | 53      | 7       | 635.655220                               | 0.000262                                                       |
| 60   | 54     | 7      | 59    | 53      | 6       | 635.655220                               | 0.000262                                                       |
| 61   | 43     | 19     | 60    | 42      | 19      | 635.658260                               | 0.000005                                                       |
| 61   | 42     | 19     | 60    | 41      | 19      | 635.658260                               | 0.000233                                                       |
| 61   | 41     | 20     | 60    | 40      | 20      | 635.668890                               | 0.000170                                                       |
| 61   | 42     | 20     | 60    | 41      | 20      | 635.668890                               | 0.000146                                                       |
| 61   | 41     | 21     | 60    | 40      | 21      | 635.677860                               | 0.000120                                                       |
| 61   | 40     | 21     | 60    | 39      | 21      | 635.677860                               | 0.000122                                                       |
| 60   | 55     | 5      | 59    | 54      | 5       | 635.683840                               | 0.000138                                                       |
| 60   | 55     | 6      | 59    | 54      | 6       | 635.683840                               | 0.000138                                                       |
| 60   | 55     | 5      | 59    | 54      | 6       | 635.683840                               | 0.000138                                                       |
| 60   | 55     | 6      | 59    | 54      | 5       | 635.683840                               | 0.000138                                                       |
| 61   | 40     | 22     | 60    | 39      | 22      | 635.685500                               | -0.000155                                                      |
| 61   | 39     | 22     | 60    | 38      | 22      | 635.685500                               | -0.000155                                                      |
| 61   | 39     | 23     | 60    | 38      | 23      | 635.692820                               | 0.000023                                                       |
| 61   | 38     | 23     | 60    | 37      | 23      | 635.692820                               | 0.000023                                                       |
| 61   | 37     | 25     | 60    | 36      | 25      | 635.705560                               | 0.000098                                                       |
| 61   | 36     | 25     | 60    | 35      | 25      | 635.705560                               | 0.000098                                                       |
| 61   | 36     | 26     | 60    | 35      | 26      | 635.711360                               | 0.000124                                                       |
| 61   | 35     | 26     | 60    | 34      | 26      | 635.711360                               | 0.000124                                                       |
| 60   | 56     | 4      | 59    | 55      | 4       | 635.712530                               | 0.000200                                                       |
| 60   | 56     | 5      | 59    | 55      | 5       | 635.712530                               | 0.000200                                                       |
| 60   | 56     | 4      | 59    | 55      | 5       | 635.712530                               | 0.000200                                                       |
| 60   | 56     | 5      | 59    | 55      | 4       | 635.712530                               | 0.000200                                                       |
| 61   | 35     | 27     | 60    | 34      | 27      | 635.716860                               | 0.000108                                                       |
| 61   | 34     | 27     | 60    | 33      | 27      | 635.716860                               | 0.000108                                                       |
| 61   | 34     | 28     | 60    | 33      | 28      | 635.721970                               | -0.000103                                                      |
| 61   | 33     | 28     | 60    | 32      | 28      | 635.721970                               | -0.000103                                                      |
| 61   | 33     | 29     | 60    | 32      | 29      | 635.727230                               | -0.000025                                                      |
| 61   | 32     | 29     | 60    | 31      | 29      | 635.727230                               | -0.000025                                                      |
| 61   | 32     | 30     | 60    | 31      | 30      | 635.731940                               | -0.000386                                                      |
| 61   | 31     | 30     | 60    | 30      | 30      | 635.731940                               | -0.000386                                                      |
| 61   | 31     | 31     | 60    | 30      | 31      | 635.737410                               | 0.000096                                                       |
| 61   | 30     | 31     | 60    | 29      | 31      | 635.737410                               | 0.000096                                                       |
| 60   | 57     | 3      | 59    | 56      | 3       | 635.741000                               | 0.000078                                                       |
| 60   | 57     | 4      | 59    | 56      | 4       | 635.741000                               | 0.000078                                                       |
| 60   | 57     | 3      | 59    | 56      | 4       | 635.741000                               | 0.000078                                                       |
| 60   | 57     | 4      | 59    | 56      | 3       | 635.741000                               | 0.000078                                                       |
| 61   | 30     | 32     | 60    | 29      | 32      | 635.742440                               | 0.000177                                                       |
| 61   | 29     | 32     | 60    | 28      | 32      | 635.742440                               | 0.000177                                                       |
| 61   | 51     | 10     | 60    | 50      | 10      | 635.745300                               | 0.000557                                                       |
| 61   | 51     | 11     | 60    | 50      | 11      | 635.745300                               | 0.000487                                                       |
| 61   | 51     | 10     | 60    | 50      | 11      | 635.745300                               | 0.000344                                                       |
| 61   | 51     | 11     | 60    | 50      | 10      | 635.745300                               | 0.000700                                                       |
| 61   | 29     | 33     | 60    | 28      | 33      | 635.747070                               | -0.000118                                                      |

Continuation, see next page

Continuation of Table 28:  $\nu_{22} \leftarrow gs$  of dithiine.

| $J'$ | $K'_a$ | $K'_c$ | $J''$ | $K''_a$ | $K''_c$ | $\tilde{\nu}_{obs}$<br>/cm <sup>-1</sup> | $(\tilde{\nu}_{obs} - \tilde{\nu}_{cal})$<br>/cm <sup>-1</sup> |
|------|--------|--------|-------|---------|---------|------------------------------------------|----------------------------------------------------------------|
| 61   | 28     | 33     | 60    | 27      | 33      | 635.747070                               | -0.000118                                                      |
| 61   | 24     | 37     | 60    | 23      | 37      | 635.766500                               | -0.000496                                                      |
| 61   | 25     | 37     | 60    | 24      | 37      | 635.766500                               | -0.000496                                                      |
| 60   | 58     | 2      | 59    | 57      | 2       | 635.769730                               | 0.000174                                                       |
| 60   | 58     | 3      | 59    | 57      | 3       | 635.769730                               | 0.000174                                                       |
| 60   | 58     | 2      | 59    | 57      | 3       | 635.769730                               | 0.000174                                                       |
| 60   | 58     | 3      | 59    | 57      | 2       | 635.769730                               | 0.000174                                                       |
| 61   | 52     | 9      | 60    | 51      | 9       | 635.775330                               | 0.000081                                                       |
| 61   | 52     | 10     | 60    | 51      | 10      | 635.775330                               | 0.000075                                                       |
| 61   | 52     | 9      | 60    | 51      | 10      | 635.775330                               | 0.000063                                                       |
| 61   | 52     | 10     | 60    | 51      | 9       | 635.775330                               | 0.000093                                                       |
| 61   | 20     | 41     | 60    | 19      | 41      | 635.787530                               | -0.000087                                                      |
| 61   | 21     | 41     | 60    | 20      | 41      | 635.787530                               | -0.000087                                                      |
| 60   | 59     | 1      | 59    | 58      | 1       | 635.798330                               | 0.000033                                                       |
| 60   | 59     | 2      | 59    | 58      | 2       | 635.798330                               | 0.000033                                                       |
| 60   | 59     | 1      | 59    | 58      | 2       | 635.798330                               | 0.000033                                                       |
| 60   | 59     | 2      | 59    | 58      | 1       | 635.798330                               | 0.000033                                                       |
| 61   | 53     | 8      | 60    | 52      | 8       | 635.804830                               | 0.000026                                                       |
| 61   | 53     | 9      | 60    | 52      | 9       | 635.804830                               | 0.000025                                                       |
| 61   | 53     | 8      | 60    | 52      | 9       | 635.804830                               | 0.000024                                                       |
| 61   | 53     | 9      | 60    | 52      | 8       | 635.804830                               | 0.000026                                                       |
| 60   | 60     | 0      | 59    | 59      | 0       | 635.827020                               | -0.000189                                                      |
| 60   | 60     | 1      | 59    | 59      | 1       | 635.827020                               | -0.000189                                                      |
| 60   | 60     | 0      | 59    | 59      | 1       | 635.827020                               | -0.000189                                                      |
| 60   | 60     | 1      | 59    | 59      | 0       | 635.827020                               | -0.000189                                                      |
| 61   | 54     | 7      | 60    | 53      | 7       | 635.833390                               | -0.000372                                                      |
| 61   | 54     | 8      | 60    | 53      | 8       | 635.833390                               | -0.000372                                                      |
| 61   | 54     | 7      | 60    | 53      | 8       | 635.833390                               | -0.000373                                                      |
| 61   | 54     | 8      | 60    | 53      | 7       | 635.833390                               | -0.000372                                                      |
| 61   | 55     | 6      | 60    | 54      | 6       | 635.862660                               | 0.000301                                                       |
| 61   | 55     | 7      | 60    | 54      | 7       | 635.862660                               | 0.000301                                                       |
| 61   | 55     | 6      | 60    | 54      | 7       | 635.862660                               | 0.000301                                                       |
| 61   | 55     | 7      | 60    | 54      | 6       | 635.862660                               | 0.000301                                                       |
| 62   | 42     | 20     | 61    | 41      | 20      | 635.869230                               | -0.000024                                                      |
| 62   | 43     | 20     | 61    | 42      | 20      | 635.869230                               | -0.000068                                                      |
| 62   | 42     | 21     | 61    | 41      | 21      | 635.878590                               | -0.000084                                                      |
| 62   | 41     | 21     | 61    | 40      | 21      | 635.878590                               | -0.000079                                                      |
| 62   | 41     | 22     | 61    | 40      | 22      | 635.886460                               | -0.000419                                                      |
| 62   | 40     | 22     | 61    | 39      | 22      | 635.886460                               | -0.000419                                                      |
| 61   | 56     | 5      | 60    | 55      | 5       | 635.890990                               | 0.000252                                                       |
| 61   | 56     | 6      | 60    | 55      | 6       | 635.890990                               | 0.000252                                                       |
| 61   | 56     | 5      | 60    | 55      | 6       | 635.890990                               | 0.000252                                                       |
| 61   | 56     | 6      | 60    | 55      | 5       | 635.890990                               | 0.000252                                                       |
| 62   | 40     | 23     | 61    | 39      | 23      | 635.893970                               | -0.000259                                                      |
| 62   | 39     | 23     | 61    | 38      | 23      | 635.893970                               | -0.000259                                                      |
| 62   | 38     | 25     | 61    | 37      | 25      | 635.906990                               | -0.000226                                                      |

Continuation, see next page

Continuation of Table 28:  $\nu_{22} \leftarrow gs$  of dithiine.

| $J'$ | $K'_a$ | $K'_c$ | $J''$ | $K''_a$ | $K''_c$ | $\tilde{\nu}_{obs}$<br>/cm <sup>-1</sup> | $(\tilde{\nu}_{obs} - \tilde{\nu}_{cal})$<br>/cm <sup>-1</sup> |
|------|--------|--------|-------|---------|---------|------------------------------------------|----------------------------------------------------------------|
| 62   | 37     | 25     | 61    | 36      | 25      | 635.906990                               | -0.000226                                                      |
| 62   | 37     | 26     | 61    | 36      | 26      | 635.912950                               | -0.000156                                                      |
| 62   | 36     | 26     | 61    | 35      | 26      | 635.912950                               | -0.000156                                                      |
| 61   | 57     | 4      | 60    | 56      | 4       | 635.918980                               | -0.000017                                                      |
| 61   | 57     | 5      | 60    | 56      | 5       | 635.918980                               | -0.000017                                                      |
| 62   | 36     | 27     | 61    | 35      | 27      | 635.918980                               | 0.000263                                                       |
| 62   | 35     | 27     | 61    | 34      | 27      | 635.918980                               | 0.000263                                                       |
| 61   | 57     | 4      | 60    | 56      | 5       | 635.918980                               | -0.000017                                                      |
| 61   | 57     | 5      | 60    | 56      | 4       | 635.918980                               | -0.000017                                                      |
| 62   | 35     | 28     | 61    | 34      | 28      | 635.923930                               | -0.000186                                                      |
| 62   | 34     | 28     | 61    | 33      | 28      | 635.923930                               | -0.000186                                                      |
| 62   | 34     | 29     | 61    | 33      | 29      | 635.928980                               | -0.000379                                                      |
| 62   | 33     | 29     | 61    | 32      | 29      | 635.928980                               | -0.000379                                                      |
| 62   | 33     | 30     | 61    | 32      | 30      | 635.934510                               | 0.000023                                                       |
| 62   | 32     | 30     | 61    | 31      | 30      | 635.934510                               | 0.000023                                                       |
| 62   | 32     | 31     | 61    | 31      | 31      | 635.939370                               | -0.000154                                                      |
| 62   | 31     | 31     | 61    | 30      | 31      | 635.939370                               | -0.000154                                                      |
| 62   | 31     | 32     | 61    | 30      | 32      | 635.944570                               | 0.000073                                                       |
| 62   | 30     | 32     | 61    | 29      | 32      | 635.944570                               | 0.000073                                                       |
| 61   | 58     | 3      | 60    | 57      | 3       | 635.947210                               | -0.000039                                                      |
| 61   | 58     | 4      | 60    | 57      | 4       | 635.947210                               | -0.000039                                                      |
| 61   | 58     | 3      | 60    | 57      | 4       | 635.947210                               | -0.000039                                                      |
| 61   | 58     | 4      | 60    | 57      | 3       | 635.947210                               | -0.000039                                                      |
| 62   | 30     | 33     | 61    | 29      | 33      | 635.949350                               | -0.000096                                                      |
| 62   | 29     | 33     | 61    | 28      | 33      | 635.949350                               | -0.000096                                                      |
| 62   | 52     | 10     | 61    | 51      | 10      | 635.954110                               | 0.000268                                                       |
| 62   | 52     | 11     | 61    | 51      | 11      | 635.954110                               | 0.000227                                                       |
| 62   | 52     | 10     | 61    | 51      | 11      | 635.954110                               | 0.000143                                                       |
| 62   | 52     | 11     | 61    | 51      | 10      | 635.954110                               | 0.000352                                                       |
| 62   | 25     | 37     | 61    | 24      | 37      | 635.969480                               | 0.000190                                                       |
| 62   | 26     | 37     | 61    | 25      | 37      | 635.969480                               | 0.000190                                                       |
| 61   | 59     | 2      | 60    | 58      | 2       | 635.975710                               | 0.000169                                                       |
| 61   | 59     | 3      | 60    | 58      | 3       | 635.975710                               | 0.000169                                                       |
| 61   | 59     | 2      | 60    | 58      | 3       | 635.975710                               | 0.000169                                                       |
| 61   | 59     | 3      | 60    | 58      | 2       | 635.975710                               | 0.000169                                                       |
| 62   | 53     | 9      | 61    | 52      | 9       | 635.984110                               | 0.000327                                                       |
| 62   | 53     | 10     | 61    | 52      | 10      | 635.984110                               | 0.000324                                                       |
| 62   | 53     | 9      | 61    | 52      | 10      | 635.984110                               | 0.000317                                                       |
| 62   | 53     | 10     | 61    | 52      | 9       | 635.984110                               | 0.000334                                                       |
| 62   | 21     | 41     | 61    | 20      | 41      | 635.989910                               | 0.000044                                                       |
| 62   | 22     | 41     | 61    | 21      | 41      | 635.989910                               | 0.000044                                                       |
| 61   | 60     | 1      | 60    | 59      | 1       | 636.003910                               | -0.000042                                                      |
| 61   | 60     | 2      | 60    | 59      | 2       | 636.003910                               | -0.000042                                                      |
| 61   | 60     | 1      | 60    | 59      | 2       | 636.003910                               | -0.000042                                                      |
| 61   | 60     | 2      | 60    | 59      | 1       | 636.003910                               | -0.000042                                                      |
| 62   | 54     | 8      | 61    | 53      | 8       | 636.013360                               | 0.000501                                                       |

Continuation, see next page

Continuation of Table 28:  $\nu_{22} \leftarrow gs$  of dithiine.

| $J'$ | $K'_a$ | $K'_c$ | $J''$ | $K''_a$ | $K''_c$ | $\tilde{\nu}_{obs}$<br>/cm <sup>-1</sup> | $(\tilde{\nu}_{obs} - \tilde{\nu}_{cal})$<br>/cm <sup>-1</sup> |
|------|--------|--------|-------|---------|---------|------------------------------------------|----------------------------------------------------------------|
| 62   | 54     | 9      | 61    | 53      | 9       | 636.013360                               | 0.000501                                                       |
| 62   | 54     | 8      | 61    | 53      | 9       | 636.013360                               | 0.000500                                                       |
| 62   | 54     | 9      | 61    | 53      | 8       | 636.013360                               | 0.000501                                                       |
| 61   | 61     | 0      | 60    | 60      | 0       | 636.032350                               | -0.000180                                                      |
| 61   | 61     | 1      | 60    | 60      | 1       | 636.032350                               | -0.000180                                                      |
| 61   | 61     | 0      | 60    | 60      | 1       | 636.032350                               | -0.000180                                                      |
| 61   | 61     | 1      | 60    | 60      | 0       | 636.032350                               | -0.000180                                                      |
| 62   | 55     | 7      | 61    | 54      | 7       | 636.041440                               | 0.000040                                                       |
| 62   | 55     | 8      | 61    | 54      | 8       | 636.041440                               | 0.000040                                                       |
| 62   | 55     | 7      | 61    | 54      | 8       | 636.041440                               | 0.000040                                                       |
| 62   | 55     | 8      | 61    | 54      | 7       | 636.041440                               | 0.000040                                                       |
| 62   | 56     | 6      | 61    | 55      | 6       | 636.069580                               | -0.000026                                                      |
| 62   | 56     | 7      | 61    | 55      | 7       | 636.069580                               | -0.000026                                                      |
| 63   | 43     | 20     | 62    | 42      | 20      | 636.069580                               | -0.000070                                                      |
| 63   | 44     | 20     | 62    | 43      | 20      | 636.069580                               | -0.000149                                                      |
| 62   | 56     | 6      | 61    | 55      | 7       | 636.069580                               | -0.000026                                                      |
| 62   | 56     | 7      | 61    | 55      | 6       | 636.069580                               | -0.000026                                                      |
| 63   | 43     | 21     | 62    | 42      | 21      | 636.079330                               | -0.000169                                                      |
| 63   | 42     | 21     | 62    | 41      | 21      | 636.079330                               | -0.000161                                                      |
| 63   | 42     | 22     | 62    | 41      | 22      | 636.087880                               | -0.000130                                                      |
| 63   | 41     | 22     | 62    | 40      | 22      | 636.087880                               | -0.000130                                                      |
| 63   | 41     | 23     | 62    | 40      | 23      | 636.095370                               | -0.000229                                                      |
| 63   | 40     | 23     | 62    | 39      | 23      | 636.095370                               | -0.000229                                                      |
| 62   | 57     | 5      | 61    | 56      | 5       | 636.097590                               | -0.000023                                                      |
| 62   | 57     | 6      | 61    | 56      | 6       | 636.097590                               | -0.000023                                                      |
| 62   | 57     | 5      | 61    | 56      | 6       | 636.097590                               | -0.000023                                                      |
| 62   | 57     | 6      | 61    | 56      | 5       | 636.097590                               | -0.000023                                                      |
| 63   | 39     | 25     | 62    | 38      | 25      | 636.108990                               | 0.000073                                                       |
| 63   | 38     | 25     | 62    | 37      | 25      | 636.108990                               | 0.000073                                                       |
| 63   | 38     | 26     | 62    | 37      | 26      | 636.114780                               | -0.000151                                                      |
| 63   | 37     | 26     | 62    | 36      | 26      | 636.114780                               | -0.000151                                                      |
| 63   | 37     | 27     | 62    | 36      | 27      | 636.120290                               | -0.000345                                                      |
| 63   | 36     | 27     | 62    | 35      | 27      | 636.120290                               | -0.000345                                                      |
| 62   | 58     | 4      | 61    | 57      | 4       | 636.126020                               | 0.000507                                                       |
| 62   | 58     | 5      | 61    | 57      | 5       | 636.126020                               | 0.000507                                                       |
| 63   | 36     | 28     | 62    | 35      | 28      | 636.126020                               | -0.000100                                                      |
| 63   | 35     | 28     | 62    | 34      | 28      | 636.126020                               | -0.000100                                                      |
| 62   | 58     | 4      | 61    | 57      | 5       | 636.126020                               | 0.000507                                                       |
| 62   | 58     | 5      | 61    | 57      | 4       | 636.126020                               | 0.000507                                                       |
| 63   | 34     | 30     | 62    | 33      | 30      | 636.136310                               | -0.000301                                                      |
| 63   | 33     | 30     | 62    | 32      | 30      | 636.136310                               | -0.000301                                                      |
| 63   | 33     | 31     | 62    | 32      | 31      | 636.141670                               | -0.000021                                                      |
| 63   | 32     | 31     | 62    | 31      | 31      | 636.141670                               | -0.000021                                                      |
| 63   | 32     | 32     | 62    | 31      | 32      | 636.146690                               | -0.000027                                                      |
| 63   | 31     | 32     | 62    | 30      | 32      | 636.146690                               | -0.000027                                                      |
| 63   | 31     | 33     | 62    | 30      | 33      | 636.151680                               | -0.000011                                                      |

Continuation, see next page

Continuation of Table 28:  $\nu_{22} \leftarrow gs$  of dithiine.

| $J'$ | $K'_a$ | $K'_c$ | $J''$ | $K''_a$ | $K''_c$ | $\tilde{\nu}_{obs}$<br>/cm <sup>-1</sup> | $(\tilde{\nu}_{obs} - \tilde{\nu}_{cal})$<br>/cm <sup>-1</sup> |
|------|--------|--------|-------|---------|---------|------------------------------------------|----------------------------------------------------------------|
| 63   | 30     | 33     | 62    | 29      | 33      | 636.151680                               | -0.000011                                                      |
| 62   | 59     | 3      | 61    | 58      | 3       | 636.153470                               | 0.000060                                                       |
| 62   | 59     | 4      | 61    | 58      | 4       | 636.153470                               | 0.000060                                                       |
| 62   | 59     | 3      | 61    | 58      | 4       | 636.153470                               | 0.000060                                                       |
| 62   | 59     | 4      | 61    | 58      | 3       | 636.153470                               | 0.000060                                                       |
| 63   | 53     | 10     | 62    | 52      | 10      | 636.162920                               | 0.000181                                                       |
| 63   | 53     | 11     | 62    | 52      | 11      | 636.162920                               | 0.000157                                                       |
| 63   | 53     | 10     | 62    | 52      | 11      | 636.162920                               | 0.000109                                                       |
| 63   | 53     | 11     | 62    | 52      | 10      | 636.162920                               | 0.000230                                                       |
| 63   | 26     | 37     | 62    | 25      | 37      | 636.171780                               | 0.000197                                                       |
| 63   | 27     | 37     | 62    | 26      | 37      | 636.171780                               | 0.000197                                                       |
| 62   | 60     | 2      | 61    | 59      | 2       | 636.181600                               | 0.000235                                                       |
| 62   | 60     | 3      | 61    | 59      | 3       | 636.181600                               | 0.000235                                                       |
| 62   | 60     | 2      | 61    | 59      | 3       | 636.181600                               | 0.000235                                                       |
| 62   | 60     | 3      | 61    | 59      | 2       | 636.181600                               | 0.000235                                                       |
| 63   | 54     | 9      | 62    | 53      | 9       | 636.192070                               | -0.000065                                                      |
| 63   | 54     | 10     | 62    | 53      | 10      | 636.192070                               | -0.000067                                                      |
| 63   | 22     | 41     | 62    | 21      | 41      | 636.192070                               | -0.000050                                                      |
| 63   | 23     | 41     | 62    | 22      | 41      | 636.192070                               | -0.000050                                                      |
| 63   | 54     | 9      | 62    | 53      | 10      | 636.192070                               | -0.000070                                                      |
| 63   | 54     | 10     | 62    | 53      | 9       | 636.192070                               | -0.000061                                                      |
| 62   | 61     | 1      | 61    | 60      | 1       | 636.209420                               | -0.000028                                                      |
| 62   | 61     | 2      | 61    | 60      | 2       | 636.209420                               | -0.000028                                                      |
| 62   | 61     | 1      | 61    | 60      | 2       | 636.209420                               | -0.000028                                                      |
| 62   | 61     | 2      | 61    | 60      | 1       | 636.209420                               | -0.000028                                                      |
| 63   | 55     | 8      | 62    | 54      | 8       | 636.220660                               | -0.000094                                                      |
| 63   | 55     | 9      | 62    | 54      | 9       | 636.220660                               | -0.000094                                                      |
| 63   | 55     | 8      | 62    | 54      | 9       | 636.220660                               | -0.000094                                                      |
| 63   | 55     | 9      | 62    | 54      | 8       | 636.220660                               | -0.000094                                                      |
| 62   | 62     | 0      | 61    | 61      | 0       | 636.237600                               | -0.000097                                                      |
| 62   | 62     | 1      | 61    | 61      | 1       | 636.237600                               | -0.000097                                                      |
| 62   | 62     | 0      | 61    | 61      | 1       | 636.237600                               | -0.000097                                                      |
| 62   | 62     | 1      | 61    | 61      | 0       | 636.237600                               | -0.000097                                                      |
| 63   | 56     | 7      | 62    | 55      | 7       | 636.248820                               | -0.000064                                                      |
| 63   | 56     | 8      | 62    | 55      | 8       | 636.248820                               | -0.000064                                                      |
| 63   | 56     | 7      | 62    | 55      | 8       | 636.248820                               | -0.000064                                                      |
| 63   | 56     | 8      | 62    | 55      | 7       | 636.248820                               | -0.000064                                                      |
| 64   | 44     | 20     | 63    | 43      | 20      | 636.269900                               | 0.000026                                                       |
| 64   | 45     | 20     | 63    | 44      | 20      | 636.269900                               | -0.000110                                                      |
| 63   | 57     | 6      | 62    | 56      | 6       | 636.276840                               | 0.000143                                                       |
| 63   | 57     | 7      | 62    | 56      | 7       | 636.276840                               | 0.000143                                                       |
| 63   | 57     | 6      | 62    | 56      | 7       | 636.276840                               | 0.000143                                                       |
| 63   | 57     | 7      | 62    | 56      | 6       | 636.276840                               | 0.000143                                                       |
| 64   | 44     | 21     | 63    | 43      | 21      | 636.280110                               | -0.000108                                                      |
| 64   | 43     | 21     | 63    | 42      | 21      | 636.280110                               | -0.000094                                                      |
| 64   | 43     | 22     | 63    | 42      | 22      | 636.288510                               | -0.000536                                                      |

Continuation, see next page

Continuation of Table 28:  $\nu_{22} \leftarrow gs$  of dithiine.

| $J'$ | $K'_a$ | $K'_c$ | $J''$ | $K''_a$ | $K''_c$ | $\tilde{\nu}_{obs}$<br>/cm <sup>-1</sup> | $(\tilde{\nu}_{obs} - \tilde{\nu}_{cal})$<br>/cm <sup>-1</sup> |
|------|--------|--------|-------|---------|---------|------------------------------------------|----------------------------------------------------------------|
| 64   | 42     | 22     | 63    | 41      | 22      | 636.288510                               | -0.000535                                                      |
| 64   | 42     | 23     | 63    | 41      | 23      | 636.296820                               | -0.000067                                                      |
| 64   | 41     | 23     | 63    | 40      | 23      | 636.296820                               | -0.000066                                                      |
| 63   | 58     | 5      | 62    | 57      | 5       | 636.304260                               | -0.000069                                                      |
| 63   | 58     | 6      | 62    | 57      | 6       | 636.304260                               | -0.000069                                                      |
| 63   | 58     | 5      | 62    | 57      | 6       | 636.304260                               | -0.000069                                                      |
| 63   | 58     | 6      | 62    | 57      | 5       | 636.304260                               | -0.000069                                                      |
| 64   | 40     | 25     | 63    | 39      | 25      | 636.310190                               | -0.000364                                                      |
| 64   | 39     | 25     | 63    | 38      | 25      | 636.310190                               | -0.000364                                                      |
| 64   | 39     | 26     | 63    | 38      | 26      | 636.316820                               | 0.000128                                                       |
| 64   | 38     | 26     | 63    | 37      | 26      | 636.316820                               | 0.000128                                                       |
| 64   | 38     | 27     | 63    | 37      | 27      | 636.322500                               | -0.000007                                                      |
| 64   | 37     | 27     | 63    | 36      | 27      | 636.322500                               | -0.000007                                                      |
| 64   | 37     | 28     | 63    | 36      | 28      | 636.327490                               | -0.000589                                                      |
| 64   | 36     | 28     | 63    | 35      | 28      | 636.327490                               | -0.000589                                                      |
| 63   | 59     | 4      | 62    | 58      | 4       | 636.332180                               | 0.000294                                                       |
| 63   | 59     | 5      | 62    | 58      | 5       | 636.332180                               | 0.000294                                                       |
| 63   | 59     | 4      | 62    | 58      | 5       | 636.332180                               | 0.000294                                                       |
| 63   | 59     | 5      | 62    | 58      | 4       | 636.332180                               | 0.000294                                                       |
| 64   | 36     | 29     | 63    | 35      | 29      | 636.333410                               | -0.000052                                                      |
| 64   | 35     | 29     | 63    | 34      | 29      | 636.333410                               | -0.000052                                                      |
| 64   | 35     | 30     | 63    | 34      | 30      | 636.338400                               | -0.000297                                                      |
| 64   | 34     | 30     | 63    | 33      | 30      | 636.338400                               | -0.000297                                                      |
| 64   | 34     | 31     | 63    | 33      | 31      | 636.343610                               | -0.000226                                                      |
| 64   | 33     | 31     | 63    | 32      | 31      | 636.343610                               | -0.000226                                                      |
| 64   | 33     | 32     | 63    | 32      | 32      | 636.348290                               | -0.000605                                                      |
| 64   | 32     | 32     | 63    | 31      | 32      | 636.348290                               | -0.000605                                                      |
| 64   | 32     | 33     | 63    | 31      | 33      | 636.353800                               | -0.000100                                                      |
| 64   | 31     | 33     | 63    | 30      | 33      | 636.353800                               | -0.000100                                                      |
| 63   | 60     | 3      | 62    | 59      | 3       | 636.359550                               | 0.000123                                                       |
| 63   | 60     | 4      | 62    | 59      | 4       | 636.359550                               | 0.000123                                                       |
| 63   | 60     | 3      | 62    | 59      | 4       | 636.359550                               | 0.000123                                                       |
| 63   | 60     | 4      | 62    | 59      | 3       | 636.359550                               | 0.000123                                                       |
| 64   | 54     | 10     | 63    | 53      | 10      | 636.371310                               | -0.000114                                                      |
| 64   | 54     | 11     | 63    | 53      | 11      | 636.371310                               | -0.000128                                                      |
| 64   | 54     | 10     | 63    | 53      | 11      | 636.371310                               | -0.000156                                                      |
| 64   | 54     | 11     | 63    | 53      | 10      | 636.371310                               | -0.000086                                                      |
| 64   | 27     | 37     | 63    | 26      | 37      | 636.373880                               | 0.000030                                                       |
| 64   | 28     | 37     | 63    | 27      | 37      | 636.373880                               | 0.000030                                                       |
| 63   | 61     | 2      | 62    | 60      | 2       | 636.387180                               | 0.000135                                                       |
| 63   | 61     | 3      | 62    | 60      | 3       | 636.387180                               | 0.000135                                                       |
| 63   | 61     | 2      | 62    | 60      | 3       | 636.387180                               | 0.000135                                                       |
| 63   | 61     | 3      | 62    | 60      | 2       | 636.387180                               | 0.000135                                                       |
| 64   | 23     | 41     | 63    | 22      | 41      | 636.394500                               | 0.000131                                                       |
| 64   | 24     | 41     | 63    | 23      | 41      | 636.394500                               | 0.000131                                                       |
| 64   | 56     | 8      | 63    | 55      | 8       | 636.428450                               | -0.000029                                                      |

Continuation, see next page

Continuation of Table 28:  $\nu_{22} \leftarrow gs$  of dithiine.

| $J'$ | $K'_a$ | $K'_c$ | $J''$ | $K''_a$ | $K''_c$ | $\tilde{\nu}_{obs}$<br>/cm <sup>-1</sup> | $(\tilde{\nu}_{obs} - \tilde{\nu}_{cal})$<br>/cm <sup>-1</sup> |
|------|--------|--------|-------|---------|---------|------------------------------------------|----------------------------------------------------------------|
| 64   | 56     | 9      | 63    | 55      | 9       | 636.428450                               | -0.000029                                                      |
| 64   | 56     | 8      | 63    | 55      | 9       | 636.428450                               | -0.000029                                                      |
| 64   | 56     | 9      | 63    | 55      | 8       | 636.428450                               | -0.000029                                                      |
| 63   | 63     | 0      | 62    | 62      | 0       | 636.442820                               | 0.000116                                                       |
| 63   | 63     | 1      | 62    | 62      | 1       | 636.442820                               | 0.000116                                                       |
| 63   | 63     | 0      | 62    | 62      | 1       | 636.442820                               | 0.000116                                                       |
| 63   | 63     | 1      | 62    | 62      | 0       | 636.442820                               | 0.000116                                                       |
| 64   | 57     | 7      | 63    | 56      | 7       | 636.456320                               | 0.000117                                                       |
| 64   | 57     | 8      | 63    | 56      | 8       | 636.456320                               | 0.000117                                                       |
| 64   | 57     | 7      | 63    | 56      | 8       | 636.456320                               | 0.000117                                                       |
| 64   | 57     | 8      | 63    | 56      | 7       | 636.456320                               | 0.000117                                                       |
| 65   | 45     | 20     | 64    | 44      | 20      | 636.470110                               | 0.000197                                                       |
| 65   | 46     | 20     | 64    | 45      | 20      | 636.470110                               | -0.000037                                                      |
| 64   | 58     | 6      | 63    | 57      | 6       | 636.483460                               | -0.000175                                                      |
| 64   | 58     | 7      | 63    | 57      | 7       | 636.483460                               | -0.000175                                                      |
| 64   | 58     | 6      | 63    | 57      | 7       | 636.483460                               | -0.000175                                                      |
| 64   | 58     | 7      | 63    | 57      | 6       | 636.483460                               | -0.000175                                                      |
| 65   | 44     | 22     | 64    | 43      | 22      | 636.489820                               | -0.000154                                                      |
| 65   | 43     | 22     | 64    | 42      | 22      | 636.489820                               | -0.000152                                                      |
| 64   | 59     | 5      | 63    | 58      | 5       | 636.511730                               | 0.000834                                                       |
| 64   | 59     | 6      | 63    | 58      | 6       | 636.511730                               | 0.000834                                                       |
| 65   | 41     | 25     | 64    | 40      | 25      | 636.511730                               | -0.000380                                                      |
| 65   | 40     | 25     | 64    | 39      | 25      | 636.511730                               | -0.000380                                                      |
| 64   | 59     | 5      | 63    | 58      | 6       | 636.511730                               | 0.000834                                                       |
| 64   | 59     | 6      | 63    | 58      | 5       | 636.511730                               | 0.000834                                                       |
| 65   | 40     | 26     | 64    | 39      | 26      | 636.517820                               | -0.000568                                                      |
| 65   | 39     | 26     | 64    | 38      | 26      | 636.517820                               | -0.000568                                                      |
| 65   | 39     | 27     | 64    | 38      | 27      | 636.524080                               | -0.000240                                                      |
| 65   | 38     | 27     | 64    | 37      | 27      | 636.524080                               | -0.000240                                                      |
| 65   | 38     | 28     | 64    | 37      | 28      | 636.529850                               | -0.000129                                                      |
| 65   | 37     | 28     | 64    | 36      | 28      | 636.529850                               | -0.000129                                                      |
| 65   | 37     | 29     | 64    | 36      | 29      | 636.535420                               | -0.000027                                                      |
| 65   | 36     | 29     | 64    | 35      | 29      | 636.535420                               | -0.000027                                                      |
| 64   | 60     | 4      | 63    | 59      | 4       | 636.538000                               | -0.000092                                                      |
| 64   | 60     | 5      | 63    | 59      | 5       | 636.538000                               | -0.000092                                                      |
| 64   | 60     | 4      | 63    | 59      | 5       | 636.538000                               | -0.000092                                                      |
| 64   | 60     | 5      | 63    | 59      | 4       | 636.538000                               | -0.000092                                                      |
| 65   | 36     | 30     | 64    | 35      | 30      | 636.540600                               | -0.000147                                                      |
| 65   | 35     | 30     | 64    | 34      | 30      | 636.540600                               | -0.000147                                                      |
| 65   | 35     | 31     | 64    | 34      | 31      | 636.545920                               | -0.000017                                                      |
| 65   | 34     | 31     | 64    | 33      | 31      | 636.545920                               | -0.000017                                                      |
| 65   | 34     | 32     | 64    | 33      | 32      | 636.550650                               | -0.000385                                                      |
| 65   | 33     | 32     | 64    | 32      | 32      | 636.550650                               | -0.000385                                                      |
| 65   | 33     | 33     | 64    | 32      | 33      | 636.556060                               | -0.000021                                                      |
| 65   | 32     | 33     | 64    | 31      | 33      | 636.556060                               | -0.000021                                                      |
| 64   | 61     | 3      | 63    | 60      | 3       | 636.565640                               | 0.000346                                                       |

Continuation, see next page

Continuation of Table 28:  $\nu_{22} \leftarrow gs$  of dithiine.

| $J'$ | $K'_a$ | $K'_c$ | $J''$ | $K''_a$ | $K''_c$ | $\tilde{\nu}_{obs}$<br>/cm <sup>-1</sup> | $(\tilde{\nu}_{obs} - \tilde{\nu}_{cal})$<br>/cm <sup>-1</sup> |
|------|--------|--------|-------|---------|---------|------------------------------------------|----------------------------------------------------------------|
| 64   | 61     | 4      | 63    | 60      | 4       | 636.565640                               | 0.000346                                                       |
| 64   | 61     | 3      | 63    | 60      | 4       | 636.565640                               | 0.000346                                                       |
| 64   | 61     | 4      | 63    | 60      | 3       | 636.565640                               | 0.000346                                                       |
| 65   | 28     | 37     | 64    | 27      | 37      | 636.576200                               | 0.000097                                                       |
| 65   | 29     | 37     | 64    | 28      | 37      | 636.576200                               | 0.000097                                                       |
| 65   | 55     | 10     | 64    | 54      | 10      | 636.579770                               | -0.000136                                                      |
| 65   | 55     | 11     | 64    | 54      | 11      | 636.579770                               | -0.000144                                                      |
| 65   | 55     | 10     | 64    | 54      | 11      | 636.579770                               | -0.000160                                                      |
| 65   | 55     | 11     | 64    | 54      | 10      | 636.579770                               | -0.000120                                                      |
| 64   | 62     | 2      | 63    | 61      | 2       | 636.592510                               | -0.000056                                                      |
| 64   | 62     | 3      | 63    | 61      | 3       | 636.592510                               | -0.000056                                                      |
| 64   | 62     | 2      | 63    | 61      | 3       | 636.592510                               | -0.000056                                                      |
| 64   | 62     | 3      | 63    | 61      | 2       | 636.592510                               | -0.000056                                                      |
| 65   | 24     | 41     | 64    | 23      | 41      | 636.596420                               | -0.000185                                                      |
| 65   | 25     | 41     | 64    | 24      | 41      | 636.596420                               | -0.000185                                                      |
| 65   | 56     | 9      | 64    | 55      | 9       | 636.608430                               | 0.000130                                                       |
| 65   | 56     | 10     | 64    | 55      | 10      | 636.608430                               | 0.000129                                                       |
| 65   | 56     | 9      | 64    | 55      | 10      | 636.608430                               | 0.000128                                                       |
| 65   | 56     | 10     | 64    | 55      | 9       | 636.608430                               | 0.000131                                                       |
| 64   | 63     | 1      | 63    | 62      | 1       | 636.620180                               | 0.000205                                                       |
| 64   | 63     | 2      | 63    | 62      | 2       | 636.620180                               | 0.000205                                                       |
| 64   | 63     | 1      | 63    | 62      | 2       | 636.620180                               | 0.000205                                                       |
| 64   | 63     | 2      | 63    | 62      | 1       | 636.620180                               | 0.000205                                                       |
| 65   | 57     | 8      | 64    | 56      | 8       | 636.636020                               | -0.000023                                                      |
| 65   | 57     | 9      | 64    | 56      | 9       | 636.636020                               | -0.000023                                                      |
| 65   | 57     | 8      | 64    | 56      | 9       | 636.636020                               | -0.000023                                                      |
| 65   | 57     | 9      | 64    | 56      | 8       | 636.636020                               | -0.000023                                                      |
| 64   | 64     | 0      | 63    | 63      | 0       | 636.647870                               | 0.000315                                                       |
| 64   | 64     | 1      | 63    | 63      | 1       | 636.647870                               | 0.000315                                                       |
| 64   | 64     | 0      | 63    | 63      | 1       | 636.647870                               | 0.000315                                                       |
| 64   | 64     | 1      | 63    | 63      | 0       | 636.647870                               | 0.000315                                                       |
| 65   | 58     | 7      | 64    | 57      | 7       | 636.663290                               | -0.000070                                                      |
| 65   | 58     | 8      | 64    | 57      | 8       | 636.663290                               | -0.000070                                                      |
| 65   | 58     | 7      | 64    | 57      | 8       | 636.663290                               | -0.000070                                                      |
| 65   | 58     | 8      | 64    | 57      | 7       | 636.663290                               | -0.000070                                                      |
| 65   | 59     | 6      | 64    | 58      | 6       | 636.690520                               | 0.000104                                                       |
| 65   | 59     | 7      | 64    | 58      | 7       | 636.690520                               | 0.000104                                                       |
| 66   | 45     | 22     | 65    | 44      | 22      | 636.690520                               | -0.000259                                                      |
| 66   | 44     | 22     | 65    | 43      | 22      | 636.690520                               | -0.000254                                                      |
| 65   | 59     | 6      | 64    | 58      | 7       | 636.690520                               | 0.000104                                                       |
| 65   | 59     | 7      | 64    | 58      | 6       | 636.690520                               | 0.000104                                                       |
| 66   | 42     | 25     | 65    | 41      | 25      | 636.712890                               | -0.000698                                                      |
| 66   | 41     | 25     | 65    | 40      | 25      | 636.712890                               | -0.000698                                                      |
| 65   | 60     | 5      | 64    | 59      | 5       | 636.717380                               | 0.000064                                                       |
| 65   | 60     | 6      | 64    | 59      | 6       | 636.717380                               | 0.000064                                                       |
| 65   | 60     | 5      | 64    | 59      | 6       | 636.717380                               | 0.000064                                                       |

Continuation, see next page

Continuation of Table 28:  $\nu_{22} \leftarrow gs$  of dithiine.

| $J'$ | $K'_a$ | $K'_c$ | $J''$ | $K''_a$ | $K''_c$ | $\tilde{\nu}_{obs}$<br>/cm <sup>-1</sup> | $(\tilde{\nu}_{obs} - \tilde{\nu}_{cal})$<br>/cm <sup>-1</sup> |
|------|--------|--------|-------|---------|---------|------------------------------------------|----------------------------------------------------------------|
| 65   | 60     | 6      | 64    | 59      | 5       | 636.717380                               | 0.000064                                                       |
| 66   | 41     | 26     | 65    | 40      | 26      | 636.719700                               | -0.000307                                                      |
| 66   | 40     | 26     | 65    | 39      | 26      | 636.719700                               | -0.000307                                                      |
| 66   | 40     | 27     | 65    | 39      | 27      | 636.725510                               | -0.000546                                                      |
| 66   | 39     | 27     | 65    | 38      | 27      | 636.725510                               | -0.000546                                                      |
| 66   | 39     | 28     | 65    | 38      | 28      | 636.731670                               | -0.000150                                                      |
| 66   | 38     | 28     | 65    | 37      | 28      | 636.731670                               | -0.000150                                                      |
| 66   | 38     | 29     | 65    | 37      | 29      | 636.737280                               | -0.000081                                                      |
| 66   | 37     | 29     | 65    | 36      | 29      | 636.737280                               | -0.000081                                                      |
| 65   | 61     | 4      | 64    | 60      | 4       | 636.744230                               | 0.000078                                                       |
| 65   | 61     | 5      | 64    | 60      | 5       | 636.744230                               | 0.000078                                                       |
| 65   | 61     | 4      | 64    | 60      | 5       | 636.744230                               | 0.000078                                                       |
| 65   | 61     | 5      | 64    | 60      | 4       | 636.744230                               | 0.000078                                                       |
| 66   | 36     | 31     | 65    | 35      | 31      | 636.747800                               | -0.000181                                                      |
| 66   | 35     | 31     | 65    | 34      | 31      | 636.747800                               | -0.000181                                                      |
| 66   | 35     | 32     | 65    | 34      | 32      | 636.753460                               | 0.000328                                                       |
| 66   | 34     | 32     | 65    | 33      | 32      | 636.753460                               | 0.000328                                                       |
| 66   | 34     | 33     | 65    | 33      | 33      | 636.758360                               | 0.000144                                                       |
| 66   | 33     | 33     | 65    | 32      | 33      | 636.758360                               | 0.000144                                                       |
| 65   | 62     | 3      | 64    | 61      | 3       | 636.771320                               | 0.000308                                                       |
| 65   | 62     | 4      | 64    | 61      | 4       | 636.771320                               | 0.000308                                                       |
| 65   | 62     | 3      | 64    | 61      | 4       | 636.771320                               | 0.000308                                                       |
| 65   | 62     | 4      | 64    | 61      | 3       | 636.771320                               | 0.000308                                                       |
| 66   | 29     | 37     | 65    | 28      | 37      | 636.778220                               | -0.000118                                                      |
| 66   | 30     | 37     | 65    | 29      | 37      | 636.778220                               | -0.000118                                                      |
| 66   | 56     | 10     | 65    | 55      | 10      | 636.788300                               | 0.000105                                                       |
| 66   | 56     | 11     | 65    | 55      | 11      | 636.788300                               | 0.000100                                                       |
| 66   | 56     | 10     | 65    | 55      | 11      | 636.788300                               | 0.000091                                                       |
| 66   | 56     | 11     | 65    | 55      | 10      | 636.788300                               | 0.000114                                                       |
| 65   | 63     | 2      | 64    | 62      | 2       | 636.798220                               | 0.000276                                                       |
| 65   | 63     | 3      | 64    | 62      | 3       | 636.798220                               | 0.000276                                                       |
| 66   | 25     | 41     | 65    | 24      | 41      | 636.798220                               | -0.000619                                                      |
| 66   | 26     | 41     | 65    | 25      | 41      | 636.798220                               | -0.000619                                                      |
| 65   | 63     | 2      | 64    | 62      | 3       | 636.798220                               | 0.000276                                                       |
| 65   | 63     | 3      | 64    | 62      | 2       | 636.798220                               | 0.000276                                                       |
| 66   | 57     | 9      | 65    | 56      | 9       | 636.816090                               | -0.000017                                                      |
| 66   | 57     | 10     | 65    | 56      | 10      | 636.816090                               | -0.000018                                                      |
| 66   | 57     | 9      | 65    | 56      | 10      | 636.816090                               | -0.000018                                                      |
| 66   | 57     | 10     | 65    | 56      | 9       | 636.816090                               | -0.000017                                                      |
| 65   | 64     | 1      | 64    | 63      | 1       | 636.825320                               | 0.000316                                                       |
| 65   | 64     | 2      | 64    | 63      | 2       | 636.825320                               | 0.000316                                                       |
| 65   | 64     | 1      | 64    | 63      | 2       | 636.825320                               | 0.000316                                                       |
| 65   | 64     | 2      | 64    | 63      | 1       | 636.825320                               | 0.000316                                                       |
| 66   | 58     | 8      | 65    | 57      | 8       | 636.843080                               | -0.000345                                                      |
| 66   | 58     | 9      | 65    | 57      | 9       | 636.843080                               | -0.000345                                                      |
| 66   | 58     | 8      | 65    | 57      | 9       | 636.843080                               | -0.000345                                                      |

Continuation, see next page

Continuation of Table 28:  $\nu_{22} \leftarrow gs$  of dithiine.

| $J'$ | $K'_a$ | $K'_c$ | $J''$ | $K''_a$ | $K''_c$ | $\tilde{\nu}_{obs}$<br>/cm <sup>-1</sup> | $(\tilde{\nu}_{obs} - \tilde{\nu}_{cal})$<br>/cm <sup>-1</sup> |
|------|--------|--------|-------|---------|---------|------------------------------------------|----------------------------------------------------------------|
| 66   | 58     | 9      | 65    | 57      | 8       | 636.843080                               | -0.000345                                                      |
| 65   | 65     | 0      | 64    | 64      | 0       | 636.852280                               | 0.000019                                                       |
| 65   | 65     | 1      | 64    | 64      | 1       | 636.852280                               | 0.000019                                                       |
| 65   | 65     | 0      | 64    | 64      | 1       | 636.852280                               | 0.000019                                                       |
| 65   | 65     | 1      | 64    | 64      | 0       | 636.852280                               | 0.000019                                                       |
| 66   | 59     | 7      | 65    | 58      | 7       | 636.870030                               | -0.000326                                                      |
| 66   | 59     | 8      | 65    | 58      | 8       | 636.870030                               | -0.000326                                                      |
| 66   | 59     | 7      | 65    | 58      | 8       | 636.870030                               | -0.000326                                                      |
| 66   | 59     | 8      | 65    | 58      | 7       | 636.870030                               | -0.000326                                                      |
| 67   | 46     | 22     | 66    | 45      | 22      | 636.890960                               | -0.000478                                                      |
| 67   | 45     | 22     | 66    | 44      | 22      | 636.890960                               | -0.000469                                                      |
| 66   | 60     | 6      | 65    | 59      | 6       | 636.897590                               | 0.000550                                                       |
| 66   | 60     | 7      | 65    | 59      | 7       | 636.897590                               | 0.000550                                                       |
| 66   | 60     | 6      | 65    | 59      | 7       | 636.897590                               | 0.000550                                                       |
| 66   | 60     | 7      | 65    | 59      | 6       | 636.897590                               | 0.000550                                                       |
| 67   | 43     | 25     | 66    | 42      | 25      | 636.914760                               | -0.000209                                                      |
| 67   | 42     | 25     | 66    | 41      | 25      | 636.914760                               | -0.000209                                                      |
| 67   | 42     | 26     | 66    | 41      | 26      | 636.921220                               | -0.000322                                                      |
| 67   | 41     | 26     | 66    | 40      | 26      | 636.921220                               | -0.000322                                                      |
| 66   | 61     | 5      | 65    | 60      | 5       | 636.923660                               | 0.000080                                                       |
| 66   | 61     | 6      | 65    | 60      | 6       | 636.923660                               | 0.000080                                                       |
| 66   | 61     | 5      | 65    | 60      | 6       | 636.923660                               | 0.000080                                                       |
| 66   | 61     | 6      | 65    | 60      | 5       | 636.923660                               | 0.000080                                                       |
| 67   | 41     | 27     | 66    | 40      | 27      | 636.927550                               | -0.000165                                                      |
| 67   | 40     | 27     | 66    | 39      | 27      | 636.927550                               | -0.000165                                                      |
| 67   | 40     | 28     | 66    | 39      | 28      | 636.933500                               | -0.000088                                                      |
| 67   | 39     | 28     | 66    | 38      | 28      | 636.933500                               | -0.000088                                                      |
| 67   | 39     | 29     | 66    | 38      | 29      | 636.938860                               | -0.000358                                                      |
| 67   | 38     | 29     | 66    | 37      | 29      | 636.938860                               | -0.000358                                                      |
| 67   | 38     | 30     | 66    | 37      | 30      | 636.943890                               | -0.000769                                                      |
| 67   | 37     | 30     | 66    | 36      | 30      | 636.943890                               | -0.000769                                                      |
| 66   | 62     | 4      | 65    | 61      | 4       | 636.950010                               | -0.000055                                                      |
| 66   | 62     | 5      | 65    | 61      | 5       | 636.950010                               | -0.000055                                                      |
| 67   | 37     | 31     | 66    | 36      | 31      | 636.950010                               | 0.000041                                                       |
| 67   | 36     | 31     | 66    | 35      | 31      | 636.950010                               | 0.000041                                                       |
| 66   | 62     | 4      | 65    | 61      | 5       | 636.950010                               | -0.000055                                                      |
| 66   | 62     | 5      | 65    | 61      | 4       | 636.950010                               | -0.000055                                                      |
| 67   | 36     | 32     | 66    | 35      | 32      | 636.955120                               | -0.000055                                                      |
| 67   | 35     | 32     | 66    | 34      | 32      | 636.955120                               | -0.000055                                                      |
| 67   | 35     | 33     | 66    | 34      | 33      | 636.960120                               | -0.000181                                                      |
| 67   | 34     | 33     | 66    | 33      | 33      | 636.960120                               | -0.000181                                                      |
| 66   | 63     | 3      | 65    | 62      | 3       | 636.976770                               | 0.000197                                                       |
| 66   | 63     | 4      | 65    | 62      | 4       | 636.976770                               | 0.000197                                                       |
| 66   | 63     | 3      | 65    | 62      | 4       | 636.976770                               | 0.000197                                                       |
| 66   | 63     | 4      | 65    | 62      | 3       | 636.976770                               | 0.000197                                                       |
| 67   | 30     | 37     | 66    | 29      | 37      | 636.980380                               | -0.000139                                                      |

Continuation, see next page

Continuation of Table 28:  $\nu_{22} \leftarrow gs$  of dithiine.

| $J'$ | $K'_a$ | $K'_c$ | $J''$ | $K''_a$ | $K''_c$ | $\tilde{\nu}_{obs}$<br>/cm <sup>-1</sup> | $(\tilde{\nu}_{obs} - \tilde{\nu}_{cal})$<br>/cm <sup>-1</sup> |
|------|--------|--------|-------|---------|---------|------------------------------------------|----------------------------------------------------------------|
| 67   | 31     | 37     | 66    | 30      | 37      | 636.980380                               | -0.000139                                                      |
| 67   | 57     | 10     | 66    | 56      | 10      | 636.995990                               | -0.000283                                                      |
| 67   | 57     | 11     | 66    | 56      | 11      | 636.995990                               | -0.000285                                                      |
| 67   | 57     | 10     | 66    | 56      | 11      | 636.995990                               | -0.000290                                                      |
| 67   | 57     | 11     | 66    | 56      | 10      | 636.995990                               | -0.000277                                                      |
| 67   | 26     | 41     | 66    | 25      | 41      | 637.000820                               | -0.000214                                                      |
| 67   | 27     | 41     | 66    | 26      | 41      | 637.000820                               | -0.000214                                                      |
| 66   | 64     | 2      | 65    | 63      | 2       | 637.003520                               | 0.000355                                                       |
| 66   | 64     | 3      | 65    | 63      | 3       | 637.003520                               | 0.000355                                                       |
| 66   | 64     | 2      | 65    | 63      | 3       | 637.003520                               | 0.000355                                                       |
| 66   | 64     | 3      | 65    | 63      | 2       | 637.003520                               | 0.000355                                                       |
| 67   | 58     | 9      | 66    | 57      | 9       | 637.023530                               | -0.000205                                                      |
| 67   | 58     | 10     | 66    | 57      | 10      | 637.023530                               | -0.000206                                                      |
| 67   | 58     | 9      | 66    | 57      | 10      | 637.023530                               | -0.000206                                                      |
| 67   | 58     | 10     | 66    | 57      | 9       | 637.023530                               | -0.000205                                                      |
| 66   | 65     | 1      | 65    | 64      | 1       | 637.030080                               | 0.000189                                                       |
| 66   | 65     | 2      | 65    | 64      | 2       | 637.030080                               | 0.000189                                                       |
| 66   | 65     | 1      | 65    | 64      | 2       | 637.030080                               | 0.000189                                                       |
| 66   | 65     | 2      | 65    | 64      | 1       | 637.030080                               | 0.000189                                                       |
| 67   | 59     | 8      | 66    | 58      | 8       | 637.050430                               | -0.000217                                                      |
| 67   | 59     | 9      | 66    | 58      | 9       | 637.050430                               | -0.000217                                                      |
| 67   | 59     | 8      | 66    | 58      | 9       | 637.050430                               | -0.000217                                                      |
| 67   | 59     | 9      | 66    | 58      | 8       | 637.050430                               | -0.000217                                                      |
| 67   | 60     | 7      | 66    | 59      | 7       | 637.077030                               | -0.000158                                                      |
| 67   | 60     | 8      | 66    | 59      | 8       | 637.077030                               | -0.000158                                                      |
| 67   | 60     | 7      | 66    | 59      | 8       | 637.077030                               | -0.000158                                                      |
| 67   | 60     | 8      | 66    | 59      | 7       | 637.077030                               | -0.000158                                                      |
| 67   | 61     | 6      | 66    | 60      | 6       | 637.103440                               | -0.000058                                                      |
| 67   | 61     | 7      | 66    | 60      | 7       | 637.103440                               | -0.000058                                                      |
| 67   | 61     | 6      | 66    | 60      | 7       | 637.103440                               | -0.000058                                                      |
| 67   | 61     | 7      | 66    | 60      | 6       | 637.103440                               | -0.000058                                                      |
| 68   | 44     | 25     | 67    | 43      | 25      | 637.116120                               | -0.000123                                                      |
| 68   | 43     | 25     | 67    | 42      | 25      | 637.116120                               | -0.000123                                                      |
| 68   | 43     | 26     | 67    | 42      | 26      | 637.122910                               | -0.000061                                                      |
| 68   | 42     | 26     | 67    | 41      | 26      | 637.122910                               | -0.000061                                                      |
| 68   | 42     | 27     | 67    | 41      | 27      | 637.129060                               | -0.000222                                                      |
| 68   | 41     | 27     | 67    | 40      | 27      | 637.129060                               | -0.000222                                                      |
| 68   | 41     | 28     | 67    | 40      | 28      | 637.134990                               | -0.000273                                                      |
| 68   | 40     | 28     | 67    | 39      | 28      | 637.134990                               | -0.000273                                                      |
| 68   | 39     | 30     | 67    | 38      | 30      | 637.146160                               | -0.000349                                                      |
| 68   | 38     | 30     | 67    | 37      | 30      | 637.146160                               | -0.000349                                                      |
| 68   | 38     | 31     | 67    | 37      | 31      | 637.151540                               | -0.000338                                                      |
| 68   | 37     | 31     | 67    | 36      | 31      | 637.151540                               | -0.000338                                                      |
| 67   | 63     | 4      | 66    | 62      | 4       | 637.155890                               | 0.000070                                                       |
| 67   | 63     | 5      | 66    | 62      | 5       | 637.155890                               | 0.000070                                                       |
| 67   | 63     | 4      | 66    | 62      | 5       | 637.155890                               | 0.000070                                                       |

Continuation, see next page

Continuation of Table 28:  $\nu_{22} \leftarrow gs$  of dithiine.

| $J'$ | $K'_a$ | $K'_c$ | $J''$ | $K''_a$ | $K''_c$ | $\tilde{\nu}_{obs}$<br>/cm <sup>-1</sup> | $(\tilde{\nu}_{obs} - \tilde{\nu}_{cal})$<br>/cm <sup>-1</sup> |
|------|--------|--------|-------|---------|---------|------------------------------------------|----------------------------------------------------------------|
| 67   | 63     | 5      | 66    | 62      | 4       | 637.155890                               | 0.000070                                                       |
| 68   | 36     | 33     | 67    | 35      | 33      | 637.162240                               | -0.000080                                                      |
| 68   | 35     | 33     | 67    | 34      | 33      | 637.162240                               | -0.000080                                                      |
| 67   | 64     | 3      | 66    | 63      | 3       | 637.182260                               | 0.000275                                                       |
| 67   | 64     | 4      | 66    | 63      | 4       | 637.182260                               | 0.000275                                                       |
| 68   | 31     | 37     | 67    | 30      | 37      | 637.182260                               | -0.000398                                                      |
| 68   | 32     | 37     | 67    | 31      | 37      | 637.182260                               | -0.000398                                                      |
| 67   | 64     | 3      | 66    | 63      | 4       | 637.182260                               | 0.000275                                                       |
| 67   | 64     | 4      | 66    | 63      | 3       | 637.182260                               | 0.000275                                                       |
| 68   | 27     | 41     | 67    | 26      | 41      | 637.203170                               | -0.000033                                                      |
| 68   | 28     | 41     | 67    | 27      | 41      | 637.203170                               | -0.000033                                                      |
| 67   | 65     | 2      | 66    | 64      | 2       | 637.208340                               | 0.000104                                                       |
| 67   | 65     | 3      | 66    | 64      | 3       | 637.208340                               | 0.000104                                                       |
| 67   | 65     | 2      | 66    | 64      | 3       | 637.208340                               | 0.000104                                                       |
| 67   | 65     | 3      | 66    | 64      | 2       | 637.208340                               | 0.000104                                                       |
| 68   | 59     | 9      | 67    | 58      | 9       | 637.231130                               | -0.000048                                                      |
| 68   | 59     | 10     | 67    | 58      | 10      | 637.231130                               | -0.000048                                                      |
| 68   | 59     | 9      | 67    | 58      | 10      | 637.231130                               | -0.000048                                                      |
| 68   | 59     | 10     | 67    | 58      | 9       | 637.231130                               | -0.000048                                                      |
| 67   | 66     | 1      | 66    | 65      | 1       | 637.234920                               | 0.000286                                                       |
| 67   | 66     | 2      | 66    | 65      | 2       | 637.234920                               | 0.000286                                                       |
| 67   | 66     | 1      | 66    | 65      | 2       | 637.234920                               | 0.000286                                                       |
| 67   | 66     | 2      | 66    | 65      | 1       | 637.234920                               | 0.000286                                                       |
| 68   | 60     | 8      | 67    | 59      | 8       | 637.257580                               | -0.000110                                                      |
| 68   | 60     | 9      | 67    | 59      | 9       | 637.257580                               | -0.000110                                                      |
| 68   | 60     | 8      | 67    | 59      | 9       | 637.257580                               | -0.000110                                                      |
| 68   | 60     | 9      | 67    | 59      | 8       | 637.257580                               | -0.000110                                                      |
| 68   | 61     | 7      | 67    | 60      | 7       | 637.283620                               | -0.000236                                                      |
| 68   | 61     | 8      | 67    | 60      | 8       | 637.283620                               | -0.000236                                                      |
| 68   | 61     | 7      | 67    | 60      | 8       | 637.283620                               | -0.000236                                                      |
| 68   | 61     | 8      | 67    | 60      | 7       | 637.283620                               | -0.000236                                                      |
| 68   | 62     | 6      | 67    | 61      | 6       | 637.309450                               | -0.000353                                                      |
| 68   | 62     | 7      | 67    | 61      | 7       | 637.309450                               | -0.000353                                                      |
| 68   | 62     | 6      | 67    | 61      | 7       | 637.309450                               | -0.000353                                                      |
| 68   | 62     | 7      | 67    | 61      | 6       | 637.309450                               | -0.000353                                                      |
| 69   | 45     | 25     | 68    | 44      | 25      | 637.317480                               | 0.000095                                                       |
| 69   | 44     | 25     | 68    | 43      | 25      | 637.317480                               | 0.000095                                                       |
| 69   | 43     | 27     | 68    | 42      | 27      | 637.330470                               | -0.000264                                                      |
| 69   | 42     | 27     | 68    | 41      | 27      | 637.330470                               | -0.000264                                                      |
| 68   | 63     | 5      | 67    | 62      | 5       | 637.335650                               | 0.000022                                                       |
| 68   | 63     | 6      | 67    | 62      | 6       | 637.335650                               | 0.000022                                                       |
| 68   | 63     | 5      | 67    | 62      | 6       | 637.335650                               | 0.000022                                                       |
| 68   | 63     | 6      | 67    | 62      | 5       | 637.335650                               | 0.000022                                                       |
| 69   | 42     | 28     | 68    | 41      | 28      | 637.337250                               | 0.000419                                                       |
| 69   | 41     | 28     | 68    | 40      | 28      | 637.337250                               | 0.000419                                                       |
| 69   | 40     | 30     | 68    | 39      | 30      | 637.347620                               | -0.000643                                                      |

Continuation, see next page

Continuation of Table 28:  $\nu_{22} \leftarrow gs$  of dithiine.

| $J'$ | $K'_a$ | $K'_c$ | $J''$ | $K''_a$ | $K''_c$ | $\tilde{\nu}_{obs}$<br>/cm <sup>-1</sup> | $(\tilde{\nu}_{obs} - \tilde{\nu}_{cal})$<br>/cm <sup>-1</sup> |
|------|--------|--------|-------|---------|---------|------------------------------------------|----------------------------------------------------------------|
| 69   | 39     | 30     | 68    | 38      | 30      | 637.347620                               | -0.000643                                                      |
| 69   | 39     | 31     | 68    | 38      | 31      | 637.354370                               | 0.000662                                                       |
| 69   | 38     | 31     | 68    | 37      | 31      | 637.354370                               | 0.000662                                                       |
| 69   | 38     | 32     | 68    | 37      | 32      | 637.358070                               | -0.000965                                                      |
| 69   | 37     | 32     | 68    | 36      | 32      | 637.358070                               | -0.000965                                                      |
| 68   | 64     | 4      | 67    | 63      | 4       | 637.361530                               | 0.000099                                                       |
| 68   | 64     | 5      | 67    | 63      | 5       | 637.361530                               | 0.000099                                                       |
| 68   | 64     | 4      | 67    | 63      | 5       | 637.361530                               | 0.000099                                                       |
| 68   | 64     | 5      | 67    | 63      | 4       | 637.361530                               | 0.000099                                                       |
| 69   | 37     | 33     | 68    | 36      | 33      | 637.364160                               | -0.000103                                                      |
| 69   | 36     | 33     | 68    | 35      | 33      | 637.364160                               | -0.000103                                                      |
| 69   | 32     | 37     | 68    | 31      | 37      | 637.384440                               | -0.000293                                                      |
| 69   | 33     | 37     | 68    | 32      | 37      | 637.384440                               | -0.000293                                                      |
| 68   | 65     | 3      | 67    | 64      | 3       | 637.387290                               | 0.000046                                                       |
| 68   | 65     | 4      | 67    | 64      | 4       | 637.387290                               | 0.000046                                                       |
| 68   | 65     | 3      | 67    | 64      | 4       | 637.387290                               | 0.000046                                                       |
| 68   | 65     | 4      | 67    | 64      | 3       | 637.387290                               | 0.000046                                                       |
| 69   | 28     | 41     | 68    | 27      | 41      | 637.405250                               | -0.000081                                                      |
| 69   | 29     | 41     | 68    | 28      | 41      | 637.405250                               | -0.000081                                                      |
| 68   | 66     | 2      | 67    | 65      | 2       | 637.413260                               | 0.000098                                                       |
| 68   | 66     | 3      | 67    | 65      | 3       | 637.413260                               | 0.000098                                                       |
| 68   | 66     | 2      | 67    | 65      | 3       | 637.413260                               | 0.000098                                                       |
| 68   | 66     | 3      | 67    | 65      | 2       | 637.413260                               | 0.000098                                                       |
| 69   | 60     | 9      | 68    | 59      | 9       | 637.438000                               | -0.000440                                                      |
| 69   | 60     | 10     | 68    | 59      | 10      | 637.438000                               | -0.000440                                                      |
| 69   | 60     | 9      | 68    | 59      | 10      | 637.438000                               | -0.000440                                                      |
| 69   | 60     | 10     | 68    | 59      | 9       | 637.438000                               | -0.000440                                                      |
| 68   | 67     | 1      | 67    | 66      | 1       | 637.439290                               | 0.000073                                                       |
| 68   | 67     | 2      | 67    | 66      | 2       | 637.439290                               | 0.000073                                                       |
| 68   | 67     | 1      | 67    | 66      | 2       | 637.439290                               | 0.000073                                                       |
| 68   | 67     | 2      | 67    | 66      | 1       | 637.439290                               | 0.000073                                                       |
| 69   | 61     | 8      | 68    | 60      | 8       | 637.464340                               | -0.000212                                                      |
| 69   | 61     | 9      | 68    | 60      | 9       | 637.464340                               | -0.000212                                                      |
| 69   | 61     | 8      | 68    | 60      | 9       | 637.464340                               | -0.000212                                                      |
| 69   | 61     | 9      | 68    | 60      | 8       | 637.464340                               | -0.000212                                                      |
| 69   | 62     | 7      | 68    | 61      | 7       | 637.490360                               | 0.000014                                                       |
| 69   | 62     | 8      | 68    | 61      | 8       | 637.490360                               | 0.000014                                                       |
| 69   | 62     | 7      | 68    | 61      | 8       | 637.490360                               | 0.000014                                                       |
| 69   | 62     | 8      | 68    | 61      | 7       | 637.490360                               | 0.000014                                                       |
| 69   | 63     | 6      | 68    | 62      | 6       | 637.515960                               | 0.000018                                                       |
| 69   | 63     | 7      | 68    | 62      | 7       | 637.515960                               | 0.000018                                                       |
| 69   | 63     | 6      | 68    | 62      | 7       | 637.515960                               | 0.000018                                                       |
| 69   | 63     | 7      | 68    | 62      | 6       | 637.515960                               | 0.000018                                                       |
| 70   | 46     | 25     | 69    | 45      | 25      | 637.518110                               | -0.000260                                                      |
| 70   | 45     | 25     | 69    | 44      | 25      | 637.518110                               | -0.000260                                                      |
| 70   | 45     | 26     | 69    | 44      | 26      | 637.525070                               | -0.000391                                                      |

Continuation, see next page

Continuation of Table 28:  $\nu_{22} \leftarrow gs$  of dithiine.

| $J'$ | $K'_a$ | $K'_c$ | $J''$ | $K''_a$ | $K''_c$ | $\tilde{\nu}_{obs}$<br>/cm <sup>-1</sup> | $(\tilde{\nu}_{obs} - \tilde{\nu}_{cal})$<br>/cm <sup>-1</sup> |
|------|--------|--------|-------|---------|---------|------------------------------------------|----------------------------------------------------------------|
| 70   | 44     | 26     | 69    | 43      | 26      | 637.525070                               | -0.000391                                                      |
| 70   | 44     | 27     | 69    | 43      | 27      | 637.531850                               | -0.000208                                                      |
| 70   | 43     | 27     | 69    | 42      | 27      | 637.531850                               | -0.000208                                                      |
| 70   | 43     | 28     | 69    | 42      | 28      | 637.538300                               | 0.000027                                                       |
| 70   | 42     | 28     | 69    | 41      | 28      | 637.538300                               | 0.000027                                                       |
| 69   | 64     | 5      | 68    | 63      | 5       | 637.541470                               | 0.000045                                                       |
| 69   | 64     | 6      | 68    | 63      | 6       | 637.541470                               | 0.000045                                                       |
| 69   | 64     | 5      | 68    | 63      | 6       | 637.541470                               | 0.000045                                                       |
| 69   | 64     | 6      | 68    | 63      | 5       | 637.541470                               | 0.000045                                                       |
| 70   | 41     | 30     | 69    | 40      | 30      | 637.549730                               | -0.000178                                                      |
| 70   | 40     | 30     | 69    | 39      | 30      | 637.549730                               | -0.000178                                                      |
| 70   | 40     | 31     | 69    | 39      | 31      | 637.555450                               | 0.000019                                                       |
| 70   | 39     | 31     | 69    | 38      | 31      | 637.555450                               | 0.000019                                                       |
| 70   | 39     | 32     | 69    | 38      | 32      | 637.560620                               | -0.000198                                                      |
| 70   | 38     | 32     | 69    | 37      | 32      | 637.560620                               | -0.000198                                                      |
| 69   | 65     | 4      | 68    | 64      | 4       | 637.566780                               | -0.000100                                                      |
| 69   | 65     | 5      | 68    | 64      | 5       | 637.566780                               | -0.000100                                                      |
| 69   | 65     | 4      | 68    | 64      | 5       | 637.566780                               | -0.000100                                                      |
| 69   | 65     | 5      | 68    | 64      | 4       | 637.566780                               | -0.000100                                                      |
| 70   | 33     | 37     | 69    | 32      | 37      | 637.586660                               | -0.000084                                                      |
| 70   | 34     | 37     | 69    | 33      | 37      | 637.586660                               | -0.000084                                                      |
| 69   | 66     | 3      | 68    | 65      | 3       | 637.592380                               | 0.000021                                                       |
| 69   | 66     | 4      | 68    | 65      | 4       | 637.592380                               | 0.000021                                                       |
| 69   | 66     | 3      | 68    | 65      | 4       | 637.592380                               | 0.000021                                                       |
| 69   | 66     | 4      | 68    | 65      | 3       | 637.592380                               | 0.000021                                                       |
| 70   | 29     | 41     | 69    | 28      | 41      | 637.607230                               | -0.000167                                                      |
| 70   | 30     | 41     | 69    | 29      | 41      | 637.607230                               | -0.000167                                                      |
| 69   | 67     | 2      | 68    | 66      | 2       | 637.618150                               | 0.000212                                                       |
| 69   | 67     | 3      | 68    | 66      | 3       | 637.618150                               | 0.000212                                                       |
| 69   | 67     | 2      | 68    | 66      | 3       | 637.618150                               | 0.000212                                                       |
| 69   | 67     | 3      | 68    | 66      | 2       | 637.618150                               | 0.000212                                                       |
| 69   | 68     | 1      | 68    | 67      | 1       | 637.643900                               | 0.000237                                                       |
| 69   | 68     | 2      | 68    | 67      | 2       | 637.643900                               | 0.000237                                                       |
| 69   | 68     | 1      | 68    | 67      | 2       | 637.643900                               | 0.000237                                                       |
| 69   | 68     | 2      | 68    | 67      | 1       | 637.643900                               | 0.000237                                                       |
| 70   | 61     | 9      | 69    | 60      | 9       | 637.645300                               | -0.000207                                                      |
| 70   | 61     | 10     | 69    | 60      | 10      | 637.645300                               | -0.000207                                                      |
| 70   | 61     | 9      | 69    | 60      | 10      | 637.645300                               | -0.000207                                                      |
| 70   | 61     | 10     | 69    | 60      | 9       | 637.645300                               | -0.000207                                                      |
| 70   | 62     | 8      | 69    | 61      | 8       | 637.670970                               | -0.000277                                                      |
| 70   | 62     | 9      | 69    | 61      | 9       | 637.670970                               | -0.000277                                                      |
| 70   | 62     | 8      | 69    | 61      | 9       | 637.670970                               | -0.000277                                                      |
| 70   | 62     | 9      | 69    | 61      | 8       | 637.670970                               | -0.000277                                                      |
| 70   | 63     | 7      | 69    | 62      | 7       | 637.696650                               | -0.000023                                                      |
| 70   | 63     | 8      | 69    | 62      | 8       | 637.696650                               | -0.000023                                                      |
| 70   | 63     | 7      | 69    | 62      | 8       | 637.696650                               | -0.000023                                                      |

Continuation, see next page

Continuation of Table 28:  $\nu_{22} \leftarrow gs$  of dithiine.

| $J'$ | $K'_a$ | $K'_c$ | $J''$ | $K''_a$ | $K''_c$ | $\tilde{\nu}_{obs}$<br>/cm <sup>-1</sup> | $(\tilde{\nu}_{obs} - \tilde{\nu}_{cal})$<br>/cm <sup>-1</sup> |
|------|--------|--------|-------|---------|---------|------------------------------------------|----------------------------------------------------------------|
| 70   | 63     | 8      | 69    | 62      | 7       | 637.696650                               | -0.000023                                                      |
| 71   | 47     | 25     | 70    | 46      | 25      | 637.719380                               | 0.000185                                                       |
| 71   | 46     | 25     | 70    | 45      | 25      | 637.719380                               | 0.000185                                                       |
| 70   | 64     | 6      | 69    | 63      | 6       | 637.721670                               | -0.000248                                                      |
| 70   | 64     | 7      | 69    | 63      | 7       | 637.721670                               | -0.000248                                                      |
| 70   | 64     | 6      | 69    | 63      | 7       | 637.721670                               | -0.000248                                                      |
| 70   | 64     | 7      | 69    | 63      | 6       | 637.721670                               | -0.000248                                                      |
| 71   | 46     | 26     | 70    | 45      | 26      | 637.726500                               | 0.000033                                                       |
| 71   | 45     | 26     | 70    | 44      | 26      | 637.726500                               | 0.000033                                                       |
| 71   | 45     | 27     | 70    | 44      | 27      | 637.733560                               | 0.000326                                                       |
| 71   | 44     | 27     | 70    | 43      | 27      | 637.733560                               | 0.000326                                                       |
| 71   | 44     | 28     | 70    | 43      | 28      | 637.739750                               | 0.000162                                                       |
| 71   | 43     | 28     | 70    | 42      | 28      | 637.739750                               | 0.000162                                                       |
| 70   | 65     | 5      | 69    | 64      | 5       | 637.746970                               | -0.000085                                                      |
| 70   | 65     | 6      | 69    | 64      | 6       | 637.746970                               | -0.000085                                                      |
| 70   | 65     | 5      | 69    | 64      | 6       | 637.746970                               | -0.000085                                                      |
| 70   | 65     | 6      | 69    | 64      | 5       | 637.746970                               | -0.000085                                                      |
| 71   | 42     | 30     | 70    | 41      | 30      | 637.751250                               | -0.000173                                                      |
| 71   | 41     | 30     | 70    | 40      | 30      | 637.751250                               | -0.000173                                                      |
| 71   | 41     | 31     | 70    | 40      | 31      | 637.756990                               | -0.000043                                                      |
| 71   | 40     | 31     | 70    | 39      | 31      | 637.756990                               | -0.000043                                                      |
| 71   | 40     | 32     | 70    | 39      | 32      | 637.762490                               | -0.000006                                                      |
| 71   | 39     | 32     | 70    | 38      | 32      | 637.762490                               | -0.000006                                                      |
| 70   | 66     | 4      | 69    | 65      | 4       | 637.772900                               | 0.000732                                                       |
| 70   | 66     | 5      | 69    | 65      | 5       | 637.772900                               | 0.000732                                                       |
| 70   | 66     | 4      | 69    | 65      | 5       | 637.772900                               | 0.000732                                                       |
| 70   | 66     | 5      | 69    | 65      | 4       | 637.772900                               | 0.000732                                                       |
| 71   | 34     | 37     | 70    | 33      | 37      | 637.788720                               | 0.000063                                                       |
| 71   | 35     | 37     | 70    | 34      | 37      | 637.788720                               | 0.000063                                                       |
| 70   | 67     | 3      | 69    | 66      | 3       | 637.797370                               | 0.000047                                                       |
| 70   | 67     | 4      | 69    | 66      | 4       | 637.797370                               | 0.000047                                                       |
| 70   | 67     | 3      | 69    | 66      | 4       | 637.797370                               | 0.000047                                                       |
| 70   | 67     | 4      | 69    | 66      | 3       | 637.797370                               | 0.000047                                                       |
| 71   | 30     | 41     | 70    | 29      | 41      | 637.809470                               | 0.000071                                                       |
| 71   | 31     | 41     | 70    | 30      | 41      | 637.809470                               | 0.000071                                                       |
| 70   | 68     | 2      | 69    | 67      | 2       | 637.822670                               | 0.000104                                                       |
| 70   | 68     | 3      | 69    | 67      | 3       | 637.822670                               | 0.000104                                                       |
| 70   | 68     | 2      | 69    | 67      | 3       | 637.822670                               | 0.000104                                                       |
| 70   | 68     | 3      | 69    | 67      | 2       | 637.822670                               | 0.000104                                                       |
| 70   | 69     | 1      | 69    | 68      | 1       | 637.847750                               | -0.000209                                                      |
| 70   | 69     | 2      | 69    | 68      | 2       | 637.847750                               | -0.000209                                                      |
| 70   | 69     | 1      | 69    | 68      | 2       | 637.847750                               | -0.000209                                                      |
| 70   | 69     | 2      | 69    | 68      | 1       | 637.847750                               | -0.000209                                                      |
| 71   | 62     | 9      | 70    | 61      | 9       | 637.851810                               | -0.000566                                                      |
| 71   | 62     | 10     | 70    | 61      | 10      | 637.851810                               | -0.000566                                                      |
| 71   | 62     | 9      | 70    | 61      | 10      | 637.851810                               | -0.000566                                                      |

Continuation, see next page

Continuation of Table 28:  $\nu_{22} \leftarrow gs$  of dithiine.

| $J'$ | $K'_a$ | $K'_c$ | $J''$ | $K''_a$ | $K''_c$ | $\tilde{\nu}_{obs}$<br>/cm <sup>-1</sup> | $(\tilde{\nu}_{obs} - \tilde{\nu}_{cal})$<br>/cm <sup>-1</sup> |
|------|--------|--------|-------|---------|---------|------------------------------------------|----------------------------------------------------------------|
| 71   | 62     | 10     | 70    | 61      | 9       | 637.851810                               | -0.000565                                                      |
| 71   | 63     | 8      | 70    | 62      | 8       | 637.877570                               | -0.000180                                                      |
| 71   | 63     | 9      | 70    | 62      | 9       | 637.877570                               | -0.000180                                                      |
| 71   | 63     | 8      | 70    | 62      | 9       | 637.877570                               | -0.000180                                                      |
| 71   | 63     | 9      | 70    | 62      | 8       | 637.877570                               | -0.000180                                                      |
| 71   | 64     | 7      | 70    | 63      | 7       | 637.902870                               | 0.000041                                                       |
| 71   | 64     | 8      | 70    | 63      | 8       | 637.902870                               | 0.000041                                                       |
| 71   | 64     | 7      | 70    | 63      | 8       | 637.902870                               | 0.000041                                                       |
| 71   | 64     | 8      | 70    | 63      | 7       | 637.902870                               | 0.000041                                                       |
| 71   | 65     | 6      | 70    | 64      | 6       | 637.927770                               | 0.000041                                                       |
| 71   | 65     | 7      | 70    | 64      | 7       | 637.927770                               | 0.000041                                                       |
| 72   | 47     | 26     | 71    | 46      | 26      | 637.927770                               | 0.000462                                                       |
| 72   | 46     | 26     | 71    | 45      | 26      | 637.927770                               | 0.000462                                                       |
| 71   | 65     | 6      | 70    | 64      | 7       | 637.927770                               | 0.000041                                                       |
| 71   | 65     | 7      | 70    | 64      | 6       | 637.927770                               | 0.000041                                                       |
| 72   | 46     | 27     | 71    | 45      | 27      | 637.934760                               | 0.000529                                                       |
| 72   | 45     | 27     | 71    | 44      | 27      | 637.934760                               | 0.000529                                                       |
| 72   | 45     | 28     | 71    | 44      | 28      | 637.940890                               | 0.000156                                                       |
| 72   | 44     | 28     | 71    | 43      | 28      | 637.940890                               | 0.000156                                                       |
| 71   | 66     | 5      | 70    | 65      | 5       | 637.952750                               | 0.000221                                                       |
| 71   | 66     | 6      | 70    | 65      | 6       | 637.952750                               | 0.000221                                                       |
| 72   | 43     | 30     | 71    | 42      | 30      | 637.952750                               | -0.000048                                                      |
| 72   | 42     | 30     | 71    | 41      | 30      | 637.952750                               | -0.000048                                                      |
| 71   | 66     | 5      | 70    | 65      | 6       | 637.952750                               | 0.000221                                                       |
| 71   | 66     | 6      | 70    | 65      | 5       | 637.952750                               | 0.000221                                                       |
| 72   | 41     | 32     | 71    | 40      | 32      | 637.964700                               | 0.000665                                                       |
| 72   | 40     | 32     | 71    | 39      | 32      | 637.964700                               | 0.000665                                                       |
| 71   | 67     | 4      | 70    | 66      | 4       | 637.977250                               | -0.000063                                                      |
| 71   | 67     | 5      | 70    | 66      | 5       | 637.977250                               | -0.000063                                                      |
| 71   | 67     | 4      | 70    | 66      | 5       | 637.977250                               | -0.000063                                                      |
| 71   | 67     | 5      | 70    | 66      | 4       | 637.977250                               | -0.000063                                                      |
| 72   | 35     | 37     | 71    | 34      | 37      | 637.990340                               | -0.000113                                                      |
| 72   | 36     | 37     | 71    | 35      | 37      | 637.990340                               | -0.000113                                                      |
| 71   | 68     | 3      | 70    | 67      | 3       | 638.001820                               | -0.000310                                                      |
| 71   | 68     | 4      | 70    | 67      | 4       | 638.001820                               | -0.000310                                                      |
| 71   | 68     | 3      | 70    | 67      | 4       | 638.001820                               | -0.000310                                                      |
| 71   | 68     | 4      | 70    | 67      | 3       | 638.001820                               | -0.000310                                                      |
| 72   | 31     | 41     | 71    | 30      | 41      | 638.011540                               | 0.000242                                                       |
| 72   | 32     | 41     | 71    | 31      | 41      | 638.011540                               | 0.000242                                                       |
| 72   | 62     | 10     | 71    | 61      | 10      | 638.032990                               | -0.000635                                                      |
| 72   | 62     | 11     | 71    | 61      | 11      | 638.032990                               | -0.000635                                                      |
| 72   | 62     | 10     | 71    | 61      | 11      | 638.032990                               | -0.000635                                                      |
| 72   | 62     | 11     | 71    | 61      | 10      | 638.032990                               | -0.000635                                                      |
| 71   | 70     | 1      | 70    | 69      | 1       | 638.051550                               | -0.000559                                                      |
| 71   | 70     | 2      | 70    | 69      | 2       | 638.051550                               | -0.000559                                                      |
| 71   | 70     | 1      | 70    | 69      | 2       | 638.051550                               | -0.000559                                                      |

Continuation, see next page

Continuation of Table 28:  $\nu_{22} \leftarrow gs$  of dithiine.

| $J'$ | $K'_a$ | $K'_c$ | $J''$ | $K''_a$ | $K''_c$ | $\tilde{\nu}_{obs}$<br>/cm <sup>-1</sup> | $(\tilde{\nu}_{obs} - \tilde{\nu}_{cal})$<br>/cm <sup>-1</sup> |
|------|--------|--------|-------|---------|---------|------------------------------------------|----------------------------------------------------------------|
| 71   | 70     | 2      | 70    | 69      | 1       | 638.051550                               | -0.000559                                                      |
| 72   | 63     | 9      | 71    | 62      | 9       | 638.058830                               | -0.000218                                                      |
| 72   | 63     | 10     | 71    | 62      | 10      | 638.058830                               | -0.000218                                                      |
| 72   | 63     | 9      | 71    | 62      | 10      | 638.058830                               | -0.000219                                                      |
| 72   | 63     | 10     | 71    | 62      | 9       | 638.058830                               | -0.000218                                                      |
| 72   | 64     | 8      | 71    | 63      | 8       | 638.083990                               | -0.000066                                                      |
| 72   | 64     | 9      | 71    | 63      | 9       | 638.083990                               | -0.000066                                                      |
| 72   | 64     | 8      | 71    | 63      | 9       | 638.083990                               | -0.000066                                                      |
| 72   | 64     | 9      | 71    | 63      | 8       | 638.083990                               | -0.000066                                                      |
| 72   | 65     | 7      | 71    | 64      | 7       | 638.108380                               | -0.000414                                                      |
| 72   | 65     | 8      | 71    | 64      | 8       | 638.108380                               | -0.000414                                                      |
| 72   | 65     | 7      | 71    | 64      | 8       | 638.108380                               | -0.000414                                                      |
| 72   | 65     | 8      | 71    | 64      | 7       | 638.108380                               | -0.000414                                                      |
| 72   | 66     | 6      | 71    | 65      | 6       | 638.133110                               | -0.000251                                                      |
| 72   | 66     | 7      | 71    | 65      | 7       | 638.133110                               | -0.000251                                                      |
| 72   | 66     | 6      | 71    | 65      | 7       | 638.133110                               | -0.000251                                                      |
| 72   | 66     | 7      | 71    | 65      | 6       | 638.133110                               | -0.000251                                                      |
| 73   | 47     | 27     | 72    | 46      | 27      | 638.135820                               | 0.000781                                                       |
| 73   | 46     | 27     | 72    | 45      | 27      | 638.135820                               | 0.000781                                                       |
| 72   | 67     | 5      | 71    | 66      | 5       | 638.157710                               | -0.000127                                                      |
| 72   | 67     | 6      | 71    | 66      | 6       | 638.157710                               | -0.000127                                                      |
| 72   | 67     | 5      | 71    | 66      | 6       | 638.157710                               | -0.000127                                                      |
| 72   | 67     | 6      | 71    | 66      | 5       | 638.157710                               | -0.000127                                                      |
| 73   | 42     | 32     | 72    | 41      | 32      | 638.165790                               | 0.000370                                                       |
| 73   | 41     | 32     | 72    | 40      | 32      | 638.165790                               | 0.000370                                                       |
| 72   | 68     | 4      | 71    | 67      | 4       | 638.181820                               | -0.000466                                                      |
| 72   | 68     | 5      | 71    | 67      | 5       | 638.181820                               | -0.000466                                                      |
| 72   | 68     | 4      | 71    | 67      | 5       | 638.181820                               | -0.000466                                                      |
| 72   | 68     | 5      | 71    | 67      | 4       | 638.181820                               | -0.000466                                                      |
| 73   | 36     | 37     | 72    | 35      | 37      | 638.192620                               | 0.000481                                                       |
| 73   | 37     | 37     | 72    | 36      | 37      | 638.192620                               | 0.000481                                                       |
| 72   | 69     | 3      | 71    | 68      | 3       | 638.206610                               | -0.000165                                                      |
| 72   | 69     | 4      | 71    | 68      | 4       | 638.206610                               | -0.000165                                                      |
| 72   | 69     | 3      | 71    | 68      | 4       | 638.206610                               | -0.000165                                                      |
| 72   | 69     | 4      | 71    | 68      | 3       | 638.206610                               | -0.000165                                                      |
| 73   | 32     | 41     | 72    | 31      | 41      | 638.213360                               | 0.000263                                                       |
| 73   | 33     | 41     | 72    | 32      | 41      | 638.213360                               | 0.000263                                                       |
| 73   | 63     | 10     | 72    | 62      | 10      | 638.240020                               | -0.000428                                                      |
| 73   | 63     | 11     | 72    | 62      | 11      | 638.240020                               | -0.000428                                                      |
| 73   | 63     | 10     | 72    | 62      | 11      | 638.240020                               | -0.000428                                                      |
| 73   | 63     | 11     | 72    | 62      | 10      | 638.240020                               | -0.000428                                                      |
| 72   | 71     | 1      | 71    | 70      | 1       | 638.256020                               | -0.000102                                                      |
| 72   | 71     | 2      | 71    | 70      | 2       | 638.256020                               | -0.000102                                                      |
| 72   | 71     | 1      | 71    | 70      | 2       | 638.256020                               | -0.000102                                                      |
| 72   | 71     | 2      | 71    | 70      | 1       | 638.256020                               | -0.000102                                                      |
| 73   | 64     | 9      | 72    | 63      | 9       | 638.265620                               | 0.000108                                                       |

Continuation, see next page

Continuation of Table 28:  $\nu_{22} \leftarrow gs$  of dithiine.

| $J'$ | $K'_a$ | $K'_c$ | $J''$ | $K''_a$ | $K''_c$ | $\tilde{\nu}_{obs}$<br>/cm <sup>-1</sup> | $(\tilde{\nu}_{obs} - \tilde{\nu}_{cal})$<br>/cm <sup>-1</sup> |
|------|--------|--------|-------|---------|---------|------------------------------------------|----------------------------------------------------------------|
| 73   | 64     | 10     | 72    | 63      | 10      | 638.265620                               | 0.000108                                                       |
| 73   | 64     | 9      | 72    | 63      | 10      | 638.265620                               | 0.000108                                                       |
| 73   | 64     | 10     | 72    | 63      | 9       | 638.265620                               | 0.000108                                                       |
| 73   | 65     | 8      | 72    | 64      | 8       | 638.289910                               | -0.000265                                                      |
| 73   | 65     | 9      | 72    | 64      | 9       | 638.289910                               | -0.000265                                                      |
| 73   | 65     | 8      | 72    | 64      | 9       | 638.289910                               | -0.000265                                                      |
| 73   | 65     | 9      | 72    | 64      | 8       | 638.289910                               | -0.000265                                                      |
| 73   | 68     | 5      | 72    | 67      | 5       | 638.363020                               | 0.000046                                                       |
| 73   | 68     | 6      | 72    | 67      | 6       | 638.363020                               | 0.000046                                                       |
| 73   | 68     | 5      | 72    | 67      | 6       | 638.363020                               | 0.000046                                                       |
| 73   | 68     | 6      | 72    | 67      | 5       | 638.363020                               | 0.000046                                                       |
| 74   | 43     | 32     | 73    | 42      | 32      | 638.367300                               | 0.000669                                                       |
| 74   | 42     | 32     | 73    | 41      | 32      | 638.367300                               | 0.000669                                                       |
| 73   | 69     | 4      | 72    | 68      | 4       | 638.387070                               | -0.000030                                                      |
| 73   | 69     | 5      | 72    | 68      | 5       | 638.387070                               | -0.000030                                                      |
| 73   | 69     | 4      | 72    | 68      | 5       | 638.387070                               | -0.000030                                                      |
| 73   | 69     | 5      | 72    | 68      | 4       | 638.387070                               | -0.000030                                                      |
| 74   | 37     | 37     | 73    | 36      | 37      | 638.394090                               | 0.000424                                                       |
| 74   | 38     | 37     | 73    | 37      | 37      | 638.394090                               | 0.000424                                                       |
| 74   | 33     | 41     | 73    | 32      | 41      | 638.414760                               | -0.000017                                                      |
| 74   | 34     | 41     | 73    | 33      | 41      | 638.414760                               | -0.000017                                                      |
| 74   | 64     | 10     | 73    | 63      | 10      | 638.447060                               | 0.000012                                                       |
| 74   | 64     | 11     | 73    | 63      | 11      | 638.447060                               | 0.000011                                                       |
| 74   | 64     | 10     | 73    | 63      | 11      | 638.447060                               | 0.000011                                                       |
| 74   | 64     | 11     | 73    | 63      | 10      | 638.447060                               | 0.000012                                                       |
| 73   | 72     | 1      | 72    | 71      | 1       | 638.459750                               | -0.000224                                                      |
| 73   | 72     | 2      | 72    | 71      | 2       | 638.459750                               | -0.000224                                                      |
| 73   | 72     | 1      | 72    | 71      | 2       | 638.459750                               | -0.000224                                                      |
| 73   | 72     | 2      | 72    | 71      | 1       | 638.459750                               | -0.000224                                                      |
| 74   | 65     | 9      | 73    | 64      | 9       | 638.471620                               | -0.000137                                                      |
| 74   | 65     | 10     | 73    | 64      | 10      | 638.471620                               | -0.000137                                                      |
| 74   | 65     | 9      | 73    | 64      | 10      | 638.471620                               | -0.000137                                                      |
| 74   | 65     | 10     | 73    | 64      | 9       | 638.471620                               | -0.000137                                                      |
| 74   | 66     | 8      | 73    | 65      | 8       | 638.496060                               | -0.000043                                                      |
| 74   | 66     | 9      | 73    | 65      | 9       | 638.496060                               | -0.000043                                                      |
| 74   | 66     | 8      | 73    | 65      | 9       | 638.496060                               | -0.000043                                                      |
| 74   | 66     | 9      | 73    | 65      | 8       | 638.496060                               | -0.000043                                                      |
| 74   | 67     | 7      | 73    | 66      | 7       | 638.519690                               | -0.000488                                                      |
| 74   | 67     | 8      | 73    | 66      | 8       | 638.519690                               | -0.000488                                                      |
| 74   | 67     | 7      | 73    | 66      | 8       | 638.519690                               | -0.000488                                                      |
| 74   | 67     | 8      | 73    | 66      | 7       | 638.519690                               | -0.000488                                                      |
| 74   | 69     | 5      | 73    | 68      | 5       | 638.568020                               | 0.000085                                                       |
| 74   | 69     | 6      | 73    | 68      | 6       | 638.568020                               | 0.000085                                                       |
| 75   | 44     | 32     | 74    | 43      | 32      | 638.568020                               | 0.000392                                                       |
| 75   | 43     | 32     | 74    | 42      | 32      | 638.568020                               | 0.000392                                                       |
| 74   | 69     | 5      | 73    | 68      | 6       | 638.568020                               | 0.000085                                                       |

Continuation, see next page

Continuation of Table 28:  $\nu_{22} \leftarrow gs$  of dithiine.

| $J'$ | $K'_a$ | $K'_c$ | $J''$ | $K''_a$ | $K''_c$ | $\tilde{\nu}_{obs}$<br>/cm <sup>-1</sup> | $(\tilde{\nu}_{obs} - \tilde{\nu}_{cal})$<br>/cm <sup>-1</sup> |
|------|--------|--------|-------|---------|---------|------------------------------------------|----------------------------------------------------------------|
| 74   | 69     | 6      | 73    | 68      | 5       | 638.568020                               | 0.000085                                                       |
| 74   | 70     | 4      | 73    | 69      | 4       | 638.592030                               | 0.000278                                                       |
| 74   | 70     | 5      | 73    | 69      | 5       | 638.592030                               | 0.000278                                                       |
| 74   | 70     | 4      | 73    | 69      | 5       | 638.592030                               | 0.000278                                                       |
| 74   | 70     | 5      | 73    | 69      | 4       | 638.592030                               | 0.000278                                                       |
| 75   | 65     | 10     | 74    | 64      | 10      | 638.653500                               | 0.000089                                                       |
| 75   | 65     | 11     | 74    | 64      | 11      | 638.653500                               | 0.000089                                                       |
| 75   | 65     | 10     | 74    | 64      | 11      | 638.653500                               | 0.000089                                                       |
| 75   | 65     | 11     | 74    | 64      | 10      | 638.653500                               | 0.000089                                                       |
| 74   | 73     | 1      | 73    | 72      | 1       | 638.663270                               | -0.000413                                                      |
| 74   | 73     | 2      | 73    | 72      | 2       | 638.663270                               | -0.000413                                                      |
| 74   | 73     | 1      | 73    | 72      | 2       | 638.663270                               | -0.000413                                                      |
| 74   | 73     | 2      | 73    | 72      | 1       | 638.663270                               | -0.000413                                                      |
| 75   | 66     | 9      | 74    | 65      | 9       | 638.677990                               | 0.000197                                                       |
| 75   | 66     | 10     | 74    | 65      | 10      | 638.677990                               | 0.000197                                                       |
| 75   | 66     | 9      | 74    | 65      | 10      | 638.677990                               | 0.000197                                                       |
| 75   | 66     | 10     | 74    | 65      | 9       | 638.677990                               | 0.000197                                                       |
| 75   | 67     | 8      | 74    | 66      | 8       | 638.701870                               | 0.000062                                                       |
| 75   | 67     | 9      | 74    | 66      | 9       | 638.701870                               | 0.000062                                                       |
| 75   | 67     | 8      | 74    | 66      | 9       | 638.701870                               | 0.000062                                                       |
| 75   | 67     | 9      | 74    | 66      | 8       | 638.701870                               | 0.000062                                                       |
| 75   | 68     | 7      | 74    | 67      | 7       | 638.725580                               | -0.000009                                                      |
| 75   | 68     | 8      | 74    | 67      | 8       | 638.725580                               | -0.000009                                                      |
| 75   | 68     | 7      | 74    | 67      | 8       | 638.725580                               | -0.000009                                                      |
| 75   | 68     | 8      | 74    | 67      | 7       | 638.725580                               | -0.000009                                                      |
| 76   | 66     | 10     | 75    | 65      | 10      | 638.859810                               | 0.000275                                                       |
| 76   | 66     | 11     | 75    | 65      | 11      | 638.859810                               | 0.000275                                                       |
| 76   | 66     | 10     | 75    | 65      | 11      | 638.859810                               | 0.000275                                                       |
| 76   | 66     | 11     | 75    | 65      | 10      | 638.859810                               | 0.000275                                                       |
| 76   | 67     | 9      | 75    | 66      | 9       | 638.883590                               | -0.000004                                                      |
| 76   | 67     | 10     | 75    | 66      | 10      | 638.883590                               | -0.000004                                                      |
| 76   | 67     | 9      | 75    | 66      | 10      | 638.883590                               | -0.000004                                                      |
| 76   | 67     | 10     | 75    | 66      | 9       | 638.883590                               | -0.000004                                                      |
| 76   | 69     | 7      | 75    | 68      | 7       | 638.930680                               | -0.000110                                                      |
| 76   | 69     | 8      | 75    | 68      | 8       | 638.930680                               | -0.000110                                                      |
| 76   | 69     | 7      | 75    | 68      | 8       | 638.930680                               | -0.000110                                                      |
| 76   | 69     | 8      | 75    | 68      | 7       | 638.930680                               | -0.000110                                                      |
| 77   | 67     | 10     | 76    | 66      | 10      | 639.066040                               | 0.000638                                                       |
| 77   | 67     | 11     | 76    | 66      | 11      | 639.066040                               | 0.000638                                                       |
| 77   | 67     | 10     | 76    | 66      | 11      | 639.066040                               | 0.000638                                                       |
| 77   | 67     | 11     | 76    | 66      | 10      | 639.066040                               | 0.000638                                                       |
| 77   | 68     | 9      | 76    | 67      | 9       | 639.089610                               | 0.000438                                                       |
| 77   | 68     | 10     | 76    | 67      | 10      | 639.089610                               | 0.000438                                                       |
| 77   | 68     | 9      | 76    | 67      | 10      | 639.089610                               | 0.000438                                                       |
| 77   | 68     | 10     | 76    | 67      | 9       | 639.089610                               | 0.000438                                                       |
| 77   | 70     | 7      | 76    | 69      | 7       | 639.136210                               | 0.000427                                                       |

Continuation, see next page

Continuation of Table 28: $\nu_{22} \leftarrow gs$  of dithiine.

| $J'$ | $K'_a$ | $K'_c$ | $J''$ | $K''_a$ | $K''_c$ | $\tilde{\nu}_{obs}$ | $(\tilde{\nu}_{obs} - \tilde{\nu}_{cal})$ |
|------|--------|--------|-------|---------|---------|---------------------|-------------------------------------------|
|      |        |        |       |         |         | /cm <sup>-1</sup>   | /cm <sup>-1</sup>                         |
| 77   | 70     | 8      | 76    | 69      | 8       | 639.136210          | 0.000427                                  |
| 77   | 70     | 7      | 76    | 69      | 8       | 639.136210          | 0.000427                                  |
| 77   | 70     | 8      | 76    | 69      | 7       | 639.136210          | 0.000427                                  |
| 78   | 69     | 9      | 77    | 68      | 9       | 639.295010          | 0.000519                                  |
| 78   | 69     | 10     | 77    | 68      | 10      | 639.295010          | 0.000519                                  |
| 78   | 69     | 9      | 77    | 68      | 10      | 639.295010          | 0.000519                                  |
| 78   | 69     | 10     | 77    | 68      | 9       | 639.295010          | 0.000519                                  |

Table 29: Rovibrational transition wavenumbers  $\tilde{\nu}_{obs}$  for the fundamental  $\nu_{17} \leftarrow gs$  of dithiine.  $J''$ ,  $K''_a$  and  $K''_c$  are lower state quantum numbers,  $J'$ ,  $K'_a$  and  $K'_c$  are upper state quantum numbers,  $\tilde{\nu}_{obs.}$  = observed wavenumber,  $\tilde{\nu}_{cal.}$  = wavenumber calculated with the parameters in Table 10. All wavenumbers are given in cm<sup>-1</sup>.

Table 29: Rovibrational transitions of  $\nu_{17} \leftarrow gs$  of dithiine.

| $J'$ | $K'_a$ | $K'_c$ | $J''$ | $K''_a$ | $K''_c$ | $\tilde{\nu}_{obs}$ | $(\tilde{\nu}_{obs} - \tilde{\nu}_{cal})$ |
|------|--------|--------|-------|---------|---------|---------------------|-------------------------------------------|
|      |        |        |       |         |         | /cm <sup>-1</sup>   | /cm <sup>-1</sup>                         |
| 32   | 9      | 24     | 33    | 8       | 25      | 1304.18320          | 0.00021                                   |
| 32   | 8      | 24     | 33    | 9       | 25      | 1304.18320          | 0.00021                                   |
| 31   | 9      | 22     | 32    | 10      | 23      | 1304.20211          | 0.00010                                   |
| 31   | 10     | 22     | 32    | 9       | 23      | 1304.20211          | 0.00010                                   |
| 30   | 11     | 20     | 31    | 10      | 21      | 1304.22101          | 0.00008                                   |
| 30   | 10     | 20     | 31    | 11      | 21      | 1304.22101          | 0.00008                                   |
| 29   | 11     | 18     | 30    | 12      | 19      | 1304.23964          | -0.00001                                  |
| 29   | 12     | 18     | 30    | 11      | 19      | 1304.23964          | -0.00001                                  |
| 32   | 7      | 25     | 33    | 8       | 26      | 1304.28066          | 0.00006                                   |
| 32   | 8      | 25     | 33    | 7       | 26      | 1304.28066          | 0.00006                                   |
| 31   | 8      | 23     | 32    | 9       | 24      | 1304.29990          | 0.00020                                   |
| 31   | 9      | 23     | 32    | 8       | 24      | 1304.29990          | 0.00020                                   |
| 30   | 10     | 21     | 31    | 9       | 22      | 1304.31891          | 0.00016                                   |
| 30   | 9      | 21     | 31    | 10      | 22      | 1304.31891          | 0.00016                                   |
| 29   | 10     | 19     | 30    | 11      | 20      | 1304.33757          | -0.00011                                  |
| 29   | 11     | 19     | 30    | 10      | 20      | 1304.33757          | -0.00011                                  |
| 32   | 7      | 26     | 33    | 6       | 27      | 1304.37821          | 0.00006                                   |
| 32   | 6      | 26     | 33    | 7       | 27      | 1304.37821          | 0.00006                                   |
| 31   | 8      | 24     | 32    | 7       | 25      | 1304.39732          | 0.00001                                   |
| 31   | 7      | 24     | 32    | 8       | 25      | 1304.39732          | 0.00001                                   |
| 30   | 8      | 22     | 31    | 9       | 23      | 1304.41640          | -0.00005                                  |
| 30   | 9      | 22     | 31    | 8       | 23      | 1304.41640          | -0.00005                                  |
| 29   | 9      | 20     | 30    | 10      | 21      | 1304.43550          | -0.00003                                  |

Continuation, see next page

Continuation of Table 29:  $\nu_{17} \leftarrow gs$  of dithiine.

| $J'$ | $K'_a$ | $K'_c$ | $J''$ | $K''_a$ | $K''_c$ | $\tilde{\nu}_{obs}$<br>/cm <sup>-1</sup> | $(\tilde{\nu}_{obs} - \tilde{\nu}_{cat})$<br>/cm <sup>-1</sup> |
|------|--------|--------|-------|---------|---------|------------------------------------------|----------------------------------------------------------------|
| 29   | 10     | 20     | 30    | 9       | 21      | 1304.43550                               | -0.00003                                                       |
| 28   | 11     | 18     | 29    | 10      | 19      | 1304.45457                               | 0.00012                                                        |
| 28   | 10     | 18     | 29    | 11      | 19      | 1304.45457                               | 0.00012                                                        |
| 31   | 6      | 25     | 32    | 7       | 26      | 1304.49517                               | 0.00031                                                        |
| 31   | 7      | 25     | 32    | 6       | 26      | 1304.49517                               | 0.00031                                                        |
| 30   | 7      | 23     | 31    | 8       | 24      | 1304.51398                               | -0.00008                                                       |
| 30   | 8      | 23     | 31    | 7       | 24      | 1304.51398                               | -0.00008                                                       |
| 29   | 8      | 21     | 30    | 9       | 22      | 1304.53319                               | -0.00005                                                       |
| 29   | 9      | 21     | 30    | 8       | 22      | 1304.53319                               | -0.00005                                                       |
| 28   | 10     | 19     | 29    | 9       | 20      | 1304.55250                               | 0.00017                                                        |
| 28   | 9      | 19     | 29    | 10      | 20      | 1304.55250                               | 0.00017                                                        |
| 31   | 5      | 26     | 32    | 6       | 27      | 1304.59222                               | -0.00014                                                       |
| 31   | 6      | 26     | 32    | 5       | 27      | 1304.59222                               | -0.00014                                                       |
| 30   | 6      | 24     | 31    | 7       | 25      | 1304.61145                               | -0.00016                                                       |
| 30   | 7      | 24     | 31    | 6       | 25      | 1304.61145                               | -0.00016                                                       |
| 29   | 7      | 22     | 30    | 8       | 23      | 1304.63090                               | 0.00004                                                        |
| 29   | 8      | 22     | 30    | 7       | 23      | 1304.63090                               | 0.00004                                                        |
| 28   | 9      | 20     | 29    | 8       | 21      | 1304.65007                               | 0.00000                                                        |
| 28   | 8      | 20     | 29    | 9       | 21      | 1304.65007                               | 0.00000                                                        |
| 27   | 9      | 18     | 28    | 10      | 19      | 1304.66937                               | 0.00021                                                        |
| 27   | 10     | 18     | 28    | 9       | 19      | 1304.66937                               | 0.00021                                                        |
| 30   | 5      | 25     | 31    | 6       | 26      | 1304.70931                               | 0.00021                                                        |
| 30   | 6      | 25     | 31    | 5       | 26      | 1304.70931                               | 0.00021                                                        |
| 29   | 6      | 23     | 30    | 7       | 24      | 1304.72873                               | 0.00033                                                        |
| 29   | 7      | 23     | 30    | 6       | 24      | 1304.72873                               | 0.00033                                                        |
| 28   | 7      | 21     | 29    | 8       | 22      | 1304.74765                               | -0.00004                                                       |
| 28   | 8      | 21     | 29    | 7       | 22      | 1304.74765                               | -0.00004                                                       |
| 27   | 8      | 19     | 28    | 9       | 20      | 1304.76696                               | 0.00004                                                        |
| 27   | 9      | 19     | 28    | 8       | 20      | 1304.76696                               | 0.00004                                                        |
| 26   | 10     | 17     | 27    | 9       | 18      | 1304.78623                               | 0.00021                                                        |
| 26   | 9      | 17     | 27    | 10      | 18      | 1304.78623                               | 0.00021                                                        |
| 30   | 4      | 26     | 31    | 5       | 27      | 1304.80657                               | 0.00001                                                        |
| 30   | 5      | 26     | 31    | 4       | 27      | 1304.80657                               | 0.00001                                                        |
| 29   | 5      | 24     | 30    | 6       | 25      | 1304.82604                               | 0.00015                                                        |
| 29   | 6      | 24     | 30    | 5       | 25      | 1304.82604                               | 0.00015                                                        |
| 28   | 7      | 22     | 29    | 6       | 23      | 1304.84535                               | 0.00011                                                        |
| 28   | 6      | 22     | 29    | 7       | 23      | 1304.84535                               | 0.00011                                                        |
| 27   | 8      | 20     | 28    | 7       | 21      | 1304.86465                               | 0.00009                                                        |
| 27   | 7      | 20     | 28    | 8       | 21      | 1304.86465                               | 0.00009                                                        |
| 26   | 9      | 18     | 27    | 8       | 19      | 1304.88417                               | 0.00036                                                        |
| 26   | 8      | 18     | 27    | 9       | 19      | 1304.88417                               | 0.00036                                                        |
| 30   | 4      | 27     | 31    | 3       | 28      | 1304.90416                               | 0.00017                                                        |
| 30   | 3      | 27     | 31    | 4       | 28      | 1304.90416                               | 0.00017                                                        |
| 29   | 4      | 25     | 30    | 5       | 26      | 1304.92325                               | -0.00009                                                       |
| 29   | 5      | 25     | 30    | 4       | 26      | 1304.92325                               | -0.00009                                                       |
| 28   | 5      | 23     | 29    | 6       | 24      | 1304.94274                               | 0.00002                                                        |

Continuation, see next page

Continuation of Table 29:  $\nu_{17} \leftarrow gs$  of dithiine.

| $J'$ | $K'_a$ | $K'_c$ | $J''$ | $K''_a$ | $K''_c$ | $\bar{\nu}_{obs}$<br>/cm <sup>-1</sup> | $(\bar{\nu}_{obs} - \bar{\nu}_{cat})$<br>/cm <sup>-1</sup> |
|------|--------|--------|-------|---------|---------|----------------------------------------|------------------------------------------------------------|
| 28   | 6      | 23     | 29    | 5       | 24      | 1304.94274                             | 0.00002                                                    |
| 27   | 6      | 21     | 28    | 7       | 22      | 1304.96239                             | 0.00028                                                    |
| 27   | 7      | 21     | 28    | 6       | 22      | 1304.96239                             | 0.00028                                                    |
| 26   | 7      | 19     | 27    | 8       | 20      | 1304.98165                             | 0.00019                                                    |
| 26   | 8      | 19     | 27    | 7       | 20      | 1304.98165                             | 0.00019                                                    |
| 25   | 8      | 17     | 26    | 9       | 18      | 1305.00072                             | 0.00001                                                    |
| 25   | 9      | 17     | 26    | 8       | 18      | 1305.00072                             | 0.00001                                                    |
| 30   | 2      | 28     | 31    | 3       | 29      | 1305.00137                             | -0.00003                                                   |
| 30   | 3      | 28     | 31    | 2       | 29      | 1305.00137                             | -0.00003                                                   |
| 24   | 9      | 15     | 25    | 10      | 16      | 1305.01978                             | 0.00003                                                    |
| 24   | 10     | 15     | 25    | 9       | 16      | 1305.01978                             | 0.00003                                                    |
| 29   | 4      | 26     | 30    | 3       | 27      | 1305.02061                             | -0.00015                                                   |
| 29   | 3      | 26     | 30    | 4       | 27      | 1305.02061                             | -0.00015                                                   |
| 28   | 4      | 24     | 29    | 5       | 25      | 1305.03990                             | -0.00026                                                   |
| 28   | 5      | 24     | 29    | 4       | 25      | 1305.03990                             | -0.00026                                                   |
| 27   | 5      | 22     | 28    | 6       | 23      | 1305.05975                             | 0.00016                                                    |
| 27   | 6      | 22     | 28    | 5       | 23      | 1305.05975                             | 0.00016                                                    |
| 26   | 7      | 20     | 27    | 6       | 21      | 1305.07901                             | 0.00000                                                    |
| 26   | 6      | 20     | 27    | 7       | 21      | 1305.07901                             | 0.00000                                                    |
| 25   | 7      | 18     | 26    | 8       | 19      | 1305.09841                             | 0.00003                                                    |
| 25   | 8      | 18     | 26    | 7       | 19      | 1305.09841                             | 0.00003                                                    |
| 24   | 9      | 16     | 25    | 8       | 17      | 1305.11748                             | -0.00015                                                   |
| 24   | 8      | 16     | 25    | 9       | 17      | 1305.11748                             | -0.00015                                                   |
| 29   | 2      | 27     | 30    | 3       | 28      | 1305.11827                             | 0.00011                                                    |
| 29   | 3      | 27     | 30    | 2       | 28      | 1305.11827                             | 0.00011                                                    |
| 28   | 4      | 25     | 29    | 3       | 26      | 1305.13745                             | -0.00012                                                   |
| 28   | 3      | 25     | 29    | 4       | 26      | 1305.13745                             | -0.00012                                                   |
| 27   | 5      | 23     | 28    | 4       | 24      | 1305.15703                             | 0.00001                                                    |
| 27   | 4      | 23     | 28    | 5       | 24      | 1305.15703                             | 0.00001                                                    |
| 26   | 6      | 21     | 27    | 5       | 22      | 1305.17658                             | 0.00009                                                    |
| 26   | 5      | 21     | 27    | 6       | 22      | 1305.17658                             | 0.00009                                                    |
| 25   | 6      | 19     | 26    | 7       | 20      | 1305.19611                             | 0.00017                                                    |
| 25   | 7      | 19     | 26    | 6       | 20      | 1305.19611                             | 0.00017                                                    |
| 30   | 0      | 30     | 31    | 1       | 31      | 1305.19639                             | 0.00020                                                    |
| 30   | 1      | 30     | 31    | 0       | 31      | 1305.19639                             | 0.00020                                                    |
| 18   | 13     | 5      | 19    | 14      | 6       | 1305.21025                             | -0.00014                                                   |
| 24   | 7      | 17     | 25    | 8       | 18      | 1305.21541                             | 0.00008                                                    |
| 24   | 8      | 17     | 25    | 7       | 18      | 1305.21541                             | 0.00008                                                    |
| 29   | 2      | 28     | 30    | 1       | 29      | 1305.21561                             | 0.00006                                                    |
| 29   | 1      | 28     | 30    | 2       | 29      | 1305.21561                             | 0.00006                                                    |
| 28   | 3      | 26     | 29    | 2       | 27      | 1305.23483                             | -0.00013                                                   |
| 28   | 2      | 26     | 29    | 3       | 27      | 1305.23483                             | -0.00013                                                   |
| 17   | 13     | 4      | 18    | 14      | 5       | 1305.24130                             | 0.00021                                                    |
| 27   | 4      | 24     | 28    | 3       | 25      | 1305.25450                             | 0.00008                                                    |
| 27   | 3      | 24     | 28    | 4       | 25      | 1305.25450                             | 0.00008                                                    |
| 26   | 4      | 22     | 27    | 5       | 23      | 1305.27407                             | 0.00015                                                    |

Continuation, see next page

Continuation of Table 29:  $\nu_{17} \leftarrow gs$  of dithiine.

| $J'$ | $K'_a$ | $K'_c$ | $J''$ | $K''_a$ | $K''_c$ | $\tilde{\nu}_{obs}$<br>/cm <sup>-1</sup> | $(\tilde{\nu}_{obs} - \tilde{\nu}_{cat})$<br>/cm <sup>-1</sup> |
|------|--------|--------|-------|---------|---------|------------------------------------------|----------------------------------------------------------------|
| 26   | 5      | 22     | 27    | 4       | 23      | 1305.27407                               | 0.00015                                                        |
| 25   | 5      | 20     | 26    | 6       | 21      | 1305.29331                               | -0.00011                                                       |
| 25   | 6      | 20     | 26    | 5       | 21      | 1305.29331                               | -0.00011                                                       |
| 19   | 13     | 7      | 20    | 12      | 8       | 1305.30158                               | 0.00023                                                        |
| 29   | 0      | 29     | 30    | 1       | 30      | 1305.31304                               | 0.00012                                                        |
| 29   | 1      | 29     | 30    | 0       | 30      | 1305.31304                               | 0.00012                                                        |
| 24   | 7      | 18     | 25    | 6       | 19      | 1305.31304                               | 0.00014                                                        |
| 24   | 6      | 18     | 25    | 7       | 19      | 1305.31304                               | 0.00014                                                        |
| 28   | 2      | 27     | 29    | 1       | 28      | 1305.33242                               | 0.00009                                                        |
| 28   | 1      | 27     | 29    | 2       | 28      | 1305.33242                               | 0.00009                                                        |
| 23   | 8      | 16     | 24    | 7       | 17      | 1305.33242                               | 0.00012                                                        |
| 23   | 7      | 16     | 24    | 8       | 17      | 1305.33242                               | 0.00012                                                        |
| 27   | 2      | 25     | 28    | 3       | 26      | 1305.35194                               | 0.00014                                                        |
| 27   | 3      | 25     | 28    | 2       | 26      | 1305.35194                               | 0.00014                                                        |
| 26   | 3      | 23     | 27    | 4       | 24      | 1305.37127                               | -0.00004                                                       |
| 26   | 4      | 23     | 27    | 3       | 24      | 1305.37127                               | -0.00004                                                       |
| 25   | 4      | 21     | 26    | 5       | 22      | 1305.39109                               | 0.00025                                                        |
| 25   | 5      | 21     | 26    | 4       | 22      | 1305.39109                               | 0.00025                                                        |
| 19   | 11     | 8      | 20    | 12      | 9       | 1305.40333                               | 0.00029                                                        |
| 19   | 12     | 8      | 20    | 11      | 9       | 1305.40333                               | -0.00008                                                       |
| 24   | 5      | 19     | 25    | 6       | 20      | 1305.41037                               | -0.00001                                                       |
| 24   | 6      | 19     | 25    | 5       | 20      | 1305.41037                               | -0.00001                                                       |
| 28   | 0      | 28     | 29    | 1       | 29      | 1305.42963                               | -0.00007                                                       |
| 28   | 1      | 28     | 29    | 0       | 29      | 1305.42963                               | -0.00007                                                       |
| 23   | 6      | 17     | 24    | 7       | 18      | 1305.42987                               | -0.00001                                                       |
| 23   | 7      | 17     | 24    | 6       | 18      | 1305.42987                               | -0.00001                                                       |
| 27   | 2      | 26     | 28    | 1       | 27      | 1305.44929                               | 0.00013                                                        |
| 27   | 1      | 26     | 28    | 2       | 27      | 1305.44929                               | 0.00013                                                        |
| 26   | 2      | 24     | 27    | 3       | 25      | 1305.46882                               | 0.00015                                                        |
| 26   | 3      | 24     | 27    | 2       | 25      | 1305.46882                               | 0.00015                                                        |
| 25   | 3      | 22     | 26    | 4       | 23      | 1305.48825                               | 0.00003                                                        |
| 25   | 4      | 22     | 26    | 3       | 23      | 1305.48825                               | 0.00003                                                        |
| 24   | 4      | 20     | 25    | 5       | 21      | 1305.50798                               | 0.00018                                                        |
| 24   | 5      | 20     | 25    | 4       | 21      | 1305.50798                               | 0.00018                                                        |
| 23   | 5      | 18     | 24    | 6       | 19      | 1305.52761                               | 0.00024                                                        |
| 23   | 6      | 18     | 24    | 5       | 19      | 1305.52761                               | 0.00024                                                        |
| 27   | 0      | 27     | 28    | 1       | 28      | 1305.54664                               | 0.00013                                                        |
| 27   | 1      | 27     | 28    | 0       | 28      | 1305.54664                               | 0.00013                                                        |
| 22   | 7      | 16     | 23    | 6       | 17      | 1305.54664                               | -0.00024                                                       |
| 22   | 6      | 16     | 23    | 7       | 17      | 1305.54664                               | -0.00024                                                       |
| 26   | 2      | 25     | 27    | 1       | 26      | 1305.56609                               | 0.00007                                                        |
| 26   | 1      | 25     | 27    | 2       | 26      | 1305.56609                               | 0.00007                                                        |
| 21   | 8      | 14     | 22    | 7       | 15      | 1305.56609                               | -0.00018                                                       |
| 21   | 7      | 14     | 22    | 8       | 15      | 1305.56609                               | -0.00018                                                       |
| 25   | 3      | 23     | 26    | 2       | 24      | 1305.58571                               | 0.00013                                                        |
| 25   | 2      | 23     | 26    | 3       | 24      | 1305.58571                               | 0.00013                                                        |

Continuation, see next page

Continuation of Table 29:  $\nu_{17} \leftarrow gs$  of dithiine.

| $J'$ | $K'_a$ | $K'_c$ | $J''$ | $K''_a$ | $K''_c$ | $\tilde{\nu}_{obs}$<br>/cm <sup>-1</sup> | $(\tilde{\nu}_{obs} - \tilde{\nu}_{cat})$<br>/cm <sup>-1</sup> |
|------|--------|--------|-------|---------|---------|------------------------------------------|----------------------------------------------------------------|
| 24   | 3      | 21     | 25    | 4       | 22      | 1305.60542                               | 0.00025                                                        |
| 24   | 4      | 21     | 25    | 3       | 22      | 1305.60542                               | 0.00025                                                        |
| 23   | 4      | 19     | 24    | 5       | 20      | 1305.62469                               | -0.00009                                                       |
| 23   | 5      | 19     | 24    | 4       | 20      | 1305.62469                               | -0.00009                                                       |
| 22   | 6      | 17     | 23    | 5       | 18      | 1305.64458                               | 0.00020                                                        |
| 22   | 5      | 17     | 23    | 6       | 18      | 1305.64458                               | 0.00020                                                        |
| 26   | 0      | 26     | 27    | 1       | 27      | 1305.66348                               | 0.00012                                                        |
| 26   | 1      | 26     | 27    | 0       | 27      | 1305.66348                               | 0.00012                                                        |
| 21   | 7      | 15     | 22    | 6       | 16      | 1305.66386                               | -0.00004                                                       |
| 21   | 6      | 15     | 22    | 7       | 16      | 1305.66386                               | -0.00004                                                       |
| 14   | 12     | 2      | 15    | 13      | 3       | 1305.67126                               | 0.00012                                                        |
| 25   | 1      | 24     | 26    | 2       | 25      | 1305.68293                               | 0.00001                                                        |
| 25   | 2      | 24     | 26    | 1       | 25      | 1305.68293                               | 0.00001                                                        |
| 24   | 3      | 22     | 25    | 2       | 23      | 1305.70247                               | -0.00005                                                       |
| 24   | 2      | 22     | 25    | 3       | 23      | 1305.70247                               | -0.00005                                                       |
| 23   | 3      | 20     | 24    | 4       | 21      | 1305.72224                               | 0.00009                                                        |
| 23   | 4      | 20     | 24    | 3       | 21      | 1305.72224                               | 0.00009                                                        |
| 22   | 5      | 18     | 23    | 4       | 19      | 1305.74178                               | -0.00001                                                       |
| 22   | 4      | 18     | 23    | 5       | 19      | 1305.74178                               | -0.00001                                                       |
| 15   | 11     | 4      | 16    | 12      | 5       | 1305.75379                               | 0.00001                                                        |
| 21   | 5      | 16     | 22    | 6       | 17      | 1305.76126                               | -0.00015                                                       |
| 21   | 6      | 16     | 22    | 5       | 17      | 1305.76126                               | -0.00015                                                       |
| 25   | 0      | 25     | 26    | 1       | 26      | 1305.78019                               | -0.00005                                                       |
| 25   | 1      | 25     | 26    | 0       | 26      | 1305.78019                               | -0.00005                                                       |
| 20   | 7      | 14     | 21    | 6       | 15      | 1305.78086                               | -0.00008                                                       |
| 20   | 6      | 14     | 21    | 7       | 15      | 1305.78086                               | -0.00008                                                       |
| 24   | 1      | 23     | 25    | 2       | 24      | 1305.79993                               | 0.00009                                                        |
| 24   | 2      | 23     | 25    | 1       | 24      | 1305.79993                               | 0.00009                                                        |
| 19   | 7      | 12     | 20    | 8       | 13      | 1305.80016                               | -0.00009                                                       |
| 19   | 8      | 12     | 20    | 7       | 13      | 1305.80016                               | -0.00009                                                       |
| 14   | 11     | 3      | 15    | 12      | 4       | 1305.80400                               | -0.00003                                                       |
| 18   | 9      | 10     | 19    | 8       | 11      | 1305.81900                               | -0.00003                                                       |
| 18   | 8      | 10     | 19    | 9       | 11      | 1305.81900                               | -0.00003                                                       |
| 23   | 3      | 21     | 24    | 2       | 22      | 1305.81952                               | 0.00004                                                        |
| 23   | 2      | 21     | 24    | 3       | 22      | 1305.81952                               | 0.00004                                                        |
| 22   | 3      | 19     | 23    | 4       | 20      | 1305.83908                               | -0.00007                                                       |
| 22   | 4      | 19     | 23    | 3       | 20      | 1305.83908                               | -0.00007                                                       |
| 21   | 4      | 17     | 22    | 5       | 18      | 1305.85876                               | -0.00006                                                       |
| 21   | 5      | 17     | 22    | 4       | 18      | 1305.85876                               | -0.00006                                                       |
| 20   | 5      | 15     | 21    | 6       | 16      | 1305.87854                               | 0.00008                                                        |
| 20   | 6      | 15     | 21    | 5       | 16      | 1305.87854                               | 0.00008                                                        |
| 24   | 1      | 24     | 25    | 0       | 25      | 1305.89715                               | -0.00001                                                       |
| 24   | 0      | 24     | 25    | 1       | 25      | 1305.89715                               | -0.00001                                                       |
| 19   | 6      | 13     | 20    | 7       | 14      | 1305.89766                               | -0.00031                                                       |
| 19   | 7      | 13     | 20    | 6       | 14      | 1305.89766                               | -0.00031                                                       |
| 23   | 1      | 22     | 24    | 2       | 23      | 1305.91693                               | 0.00013                                                        |

Continuation, see next page

Continuation of Table 29:  $\nu_{17} \leftarrow gs$  of dithiine.

| $J'$ | $K'_a$ | $K'_c$ | $J''$ | $K''_a$ | $K''_c$ | $\tilde{\nu}_{obs}$<br>/cm <sup>-1</sup> | $(\tilde{\nu}_{obs} - \tilde{\nu}_{cat})$<br>/cm <sup>-1</sup> |
|------|--------|--------|-------|---------|---------|------------------------------------------|----------------------------------------------------------------|
| 23   | 2      | 22     | 24    | 1       | 23      | 1305.91693                               | 0.00013                                                        |
| 18   | 7      | 11     | 19    | 8       | 12      | 1305.91718                               | -0.00003                                                       |
| 18   | 8      | 11     | 19    | 7       | 12      | 1305.91718                               | -0.00003                                                       |
| 17   | 9      | 9      | 18    | 8       | 10      | 1305.93584                               | 0.00011                                                        |
| 17   | 8      | 9      | 18    | 9       | 10      | 1305.93584                               | 0.00011                                                        |
| 22   | 3      | 20     | 23    | 2       | 21      | 1305.93647                               | -0.00001                                                       |
| 22   | 2      | 20     | 23    | 3       | 21      | 1305.93647                               | -0.00001                                                       |
| 15   | 12     | 4      | 16    | 11      | 5       | 1305.95110                               | -0.00003                                                       |
| 21   | 4      | 18     | 22    | 3       | 19      | 1305.95624                               | 0.00006                                                        |
| 21   | 3      | 18     | 22    | 4       | 19      | 1305.95624                               | 0.00006                                                        |
| 20   | 5      | 16     | 21    | 4       | 17      | 1305.97573                               | -0.00014                                                       |
| 20   | 4      | 16     | 21    | 5       | 17      | 1305.97573                               | -0.00014                                                       |
| 19   | 6      | 14     | 20    | 5       | 15      | 1305.99555                               | 0.00003                                                        |
| 19   | 5      | 14     | 20    | 6       | 15      | 1305.99555                               | 0.00003                                                        |
| 23   | 1      | 23     | 24    | 0       | 24      | 1306.01400                               | -0.00010                                                       |
| 23   | 0      | 23     | 24    | 1       | 24      | 1306.01400                               | -0.00010                                                       |
| 22   | 2      | 21     | 23    | 1       | 22      | 1306.03383                               | 0.00005                                                        |
| 22   | 1      | 21     | 23    | 2       | 22      | 1306.03383                               | 0.00005                                                        |
| 21   | 3      | 19     | 22    | 2       | 20      | 1306.05361                               | 0.00012                                                        |
| 21   | 2      | 19     | 22    | 3       | 20      | 1306.05361                               | 0.00012                                                        |
| 13   | 10     | 3      | 14    | 11      | 4       | 1306.05488                               | 0.00006                                                        |
| 12   | 11     | 1      | 13    | 12      | 2       | 1306.06170                               | 0.00005                                                        |
| 20   | 3      | 17     | 21    | 4       | 18      | 1306.07343                               | 0.00021                                                        |
| 20   | 4      | 17     | 21    | 3       | 18      | 1306.07343                               | 0.00021                                                        |
| 19   | 4      | 15     | 20    | 5       | 16      | 1306.09296                               | 0.00002                                                        |
| 19   | 5      | 15     | 20    | 4       | 16      | 1306.09296                               | 0.00002                                                        |
| 18   | 6      | 13     | 19    | 5       | 14      | 1306.11286                               | 0.00027                                                        |
| 18   | 5      | 13     | 19    | 6       | 14      | 1306.11286                               | 0.00027                                                        |
| 22   | 0      | 22     | 23    | 1       | 23      | 1306.13116                               | 0.00009                                                        |
| 22   | 1      | 22     | 23    | 0       | 23      | 1306.13116                               | 0.00009                                                        |
| 17   | 6      | 11     | 18    | 7       | 12      | 1306.13233                               | 0.00028                                                        |
| 17   | 7      | 11     | 18    | 6       | 12      | 1306.13233                               | 0.00028                                                        |
| 12   | 10     | 2      | 13    | 11      | 3       | 1306.14033                               | 0.00013                                                        |
| 21   | 2      | 20     | 22    | 1       | 21      | 1306.15077                               | -0.00002                                                       |
| 21   | 1      | 20     | 22    | 2       | 21      | 1306.15077                               | -0.00002                                                       |
| 20   | 3      | 18     | 21    | 2       | 19      | 1306.17058                               | 0.00005                                                        |
| 20   | 2      | 18     | 21    | 3       | 19      | 1306.17058                               | 0.00005                                                        |
| 19   | 3      | 16     | 20    | 4       | 17      | 1306.19018                               | -0.00011                                                       |
| 19   | 4      | 16     | 20    | 3       | 17      | 1306.19018                               | -0.00011                                                       |
| 18   | 4      | 14     | 19    | 5       | 15      | 1306.20978                               | -0.00024                                                       |
| 18   | 5      | 14     | 19    | 4       | 15      | 1306.20978                               | -0.00024                                                       |
| 17   | 5      | 12     | 18    | 6       | 13      | 1306.22979                               | 0.00012                                                        |
| 17   | 6      | 12     | 18    | 5       | 13      | 1306.22979                               | 0.00012                                                        |
| 21   | 1      | 21     | 22    | 0       | 22      | 1306.24809                               | 0.00003                                                        |
| 21   | 0      | 21     | 22    | 1       | 22      | 1306.24809                               | 0.00003                                                        |
| 20   | 2      | 19     | 21    | 1       | 20      | 1306.26791                               | 0.00010                                                        |

Continuation, see next page

Continuation of Table 29:  $\nu_{17} \leftarrow gs$  of dithiine.

| $J'$ | $K'_a$ | $K'_c$ | $J''$ | $K''_a$ | $K''_c$ | $\tilde{\nu}_{obs}$<br>/cm <sup>-1</sup> | $(\tilde{\nu}_{obs} - \tilde{\nu}_{cat})$<br>/cm <sup>-1</sup> |
|------|--------|--------|-------|---------|---------|------------------------------------------|----------------------------------------------------------------|
| 20   | 1      | 19     | 21    | 2       | 20      | 1306.26791                               | 0.00010                                                        |
| 19   | 2      | 17     | 20    | 3       | 18      | 1306.28758                               | -0.00001                                                       |
| 19   | 3      | 17     | 20    | 2       | 18      | 1306.28758                               | -0.00001                                                       |
| 12   | 9      | 3      | 13    | 10      | 4       | 1306.30488                               | 0.00006                                                        |
| 30   | 3      | 27     | 30    | 4       | 26      | 1306.30512                               | -0.00006                                                       |
| 30   | 4      | 27     | 30    | 5       | 26      | 1306.30512                               | -0.00006                                                       |
| 33   | 7      | 27     | 33    | 8       | 26      | 1306.30676                               | -0.00001                                                       |
| 33   | 6      | 27     | 33    | 7       | 26      | 1306.30676                               | -0.00001                                                       |
| 18   | 3      | 15     | 19    | 4       | 16      | 1306.30737                               | 0.00000                                                        |
| 18   | 4      | 15     | 19    | 3       | 16      | 1306.30737                               | 0.00000                                                        |
| 34   | 7      | 27     | 34    | 8       | 26      | 1306.30737                               | -0.00003                                                       |
| 34   | 8      | 27     | 34    | 9       | 26      | 1306.30737                               | -0.00003                                                       |
| 35   | 9      | 27     | 35    | 10      | 26      | 1306.30818                               | 0.00010                                                        |
| 35   | 8      | 27     | 35    | 9       | 26      | 1306.30818                               | 0.00010                                                        |
| 17   | 4      | 13     | 18    | 5       | 14      | 1306.32709                               | -0.00003                                                       |
| 17   | 5      | 13     | 18    | 4       | 14      | 1306.32709                               | -0.00003                                                       |
| 13   | 10     | 4      | 14    | 9       | 5       | 1306.33084                               | 0.00005                                                        |
| 20   | 0      | 20     | 21    | 1       | 21      | 1306.36491                               | -0.00017                                                       |
| 20   | 1      | 20     | 21    | 0       | 21      | 1306.36491                               | -0.00017                                                       |
| 19   | 2      | 18     | 20    | 1       | 19      | 1306.38491                               | 0.00005                                                        |
| 19   | 1      | 18     | 20    | 2       | 19      | 1306.38491                               | 0.00005                                                        |
| 26   | 0      | 26     | 26    | 1       | 25      | 1306.40069                               | -0.00004                                                       |
| 26   | 1      | 26     | 26    | 2       | 25      | 1306.40069                               | -0.00004                                                       |
| 29   | 4      | 26     | 29    | 5       | 25      | 1306.40187                               | -0.00001                                                       |
| 29   | 3      | 26     | 29    | 4       | 25      | 1306.40187                               | -0.00001                                                       |
| 31   | 6      | 26     | 31    | 7       | 25      | 1306.40281                               | -0.00003                                                       |
| 31   | 5      | 26     | 31    | 6       | 25      | 1306.40281                               | -0.00003                                                       |
| 13   | 9      | 5      | 14    | 8       | 6       | 1306.40305                               | -0.00001                                                       |
| 33   | 8      | 26     | 33    | 9       | 25      | 1306.40399                               | 0.00000                                                        |
| 33   | 7      | 26     | 33    | 8       | 25      | 1306.40399                               | 0.00000                                                        |
| 34   | 8      | 26     | 34    | 9       | 25      | 1306.40446                               | -0.00018                                                       |
| 34   | 9      | 26     | 34    | 10      | 25      | 1306.40446                               | -0.00018                                                       |
| 18   | 3      | 16     | 19    | 2       | 17      | 1306.40484                               | 0.00017                                                        |
| 18   | 2      | 16     | 19    | 3       | 17      | 1306.40484                               | 0.00017                                                        |
| 35   | 10     | 26     | 35    | 11      | 25      | 1306.40540                               | 0.00006                                                        |
| 35   | 9      | 26     | 35    | 10      | 25      | 1306.40540                               | 0.00006                                                        |
| 17   | 3      | 14     | 18    | 4       | 15      | 1306.42440                               | -0.00007                                                       |
| 17   | 4      | 14     | 18    | 3       | 15      | 1306.42440                               | -0.00007                                                       |
| 16   | 5      | 12     | 17    | 4       | 13      | 1306.44402                               | -0.00021                                                       |
| 16   | 4      | 12     | 17    | 5       | 13      | 1306.44402                               | -0.00021                                                       |
| 19   | 0      | 19     | 20    | 1       | 20      | 1306.48217                               | 0.00005                                                        |
| 19   | 1      | 19     | 20    | 0       | 20      | 1306.48217                               | 0.00005                                                        |
| 27   | 3      | 25     | 27    | 4       | 24      | 1306.49815                               | -0.00007                                                       |
| 27   | 2      | 25     | 27    | 3       | 24      | 1306.49815                               | -0.00007                                                       |
| 30   | 5      | 25     | 30    | 6       | 24      | 1306.49956                               | 0.00003                                                        |
| 30   | 6      | 25     | 30    | 7       | 24      | 1306.49956                               | 0.00003                                                        |

Continuation, see next page

Continuation of Table 29:  $\nu_{17} \leftarrow gs$  of dithiine.

| $J'$ | $K'_a$ | $K'_c$ | $J''$ | $K''_a$ | $K''_c$ | $\tilde{\nu}_{obs}$<br>/cm <sup>-1</sup> | $(\tilde{\nu}_{obs} - \tilde{\nu}_{cat})$<br>/cm <sup>-1</sup> |
|------|--------|--------|-------|---------|---------|------------------------------------------|----------------------------------------------------------------|
| 13   | 7      | 6      | 14    | 8       | 7       | 1306.49980                               | -0.00034                                                       |
| 18   | 1      | 17     | 19    | 2       | 18      | 1306.50189                               | -0.00004                                                       |
| 18   | 2      | 17     | 19    | 1       | 18      | 1306.50189                               | -0.00004                                                       |
| 34   | 9      | 25     | 34    | 10      | 24      | 1306.50189                               | -0.00005                                                       |
| 34   | 10     | 25     | 34    | 11      | 24      | 1306.50189                               | -0.00005                                                       |
| 35   | 11     | 25     | 35    | 12      | 24      | 1306.50262                               | -0.00006                                                       |
| 35   | 10     | 25     | 35    | 11      | 24      | 1306.50262                               | -0.00006                                                       |
| 17   | 3      | 15     | 18    | 2       | 16      | 1306.52183                               | 0.00007                                                        |
| 17   | 2      | 15     | 18    | 3       | 16      | 1306.52183                               | 0.00007                                                        |
| 16   | 3      | 13     | 17    | 4       | 14      | 1306.54146                               | -0.00012                                                       |
| 16   | 4      | 13     | 17    | 3       | 14      | 1306.54146                               | -0.00012                                                       |
| 15   | 4      | 11     | 16    | 5       | 12      | 1306.56161                               | 0.00027                                                        |
| 15   | 5      | 11     | 16    | 4       | 12      | 1306.56161                               | 0.00027                                                        |
| 18   | 1      | 18     | 19    | 0       | 19      | 1306.59946                               | 0.00029                                                        |
| 18   | 0      | 18     | 19    | 1       | 19      | 1306.59946                               | 0.00029                                                        |
| 17   | 1      | 16     | 18    | 2       | 17      | 1306.61919                               | 0.00018                                                        |
| 17   | 2      | 16     | 18    | 1       | 17      | 1306.61919                               | 0.00018                                                        |
| 16   | 3      | 14     | 17    | 2       | 15      | 1306.63865                               | -0.00021                                                       |
| 16   | 2      | 14     | 17    | 3       | 15      | 1306.63865                               | -0.00021                                                       |
| 15   | 4      | 12     | 16    | 3       | 13      | 1306.65905                               | 0.00035                                                        |
| 15   | 3      | 12     | 16    | 4       | 13      | 1306.65905                               | 0.00035                                                        |
| 17   | 0      | 17     | 18    | 1       | 18      | 1306.71612                               | -0.00012                                                       |
| 17   | 1      | 17     | 18    | 0       | 18      | 1306.71612                               | -0.00012                                                       |
| 15   | 3      | 13     | 16    | 2       | 14      | 1306.75576                               | -0.00022                                                       |
| 15   | 2      | 13     | 16    | 3       | 14      | 1306.75576                               | -0.00022                                                       |
| 14   | 3      | 11     | 15    | 4       | 12      | 1306.77614                               | 0.00031                                                        |
| 14   | 4      | 11     | 15    | 3       | 12      | 1306.77614                               | 0.00031                                                        |
| 26   | 4      | 22     | 26    | 5       | 21      | 1306.78935                               | -0.00007                                                       |
| 26   | 5      | 22     | 26    | 6       | 21      | 1306.78935                               | -0.00007                                                       |
| 27   | 6      | 22     | 27    | 7       | 21      | 1306.78985                               | -0.00001                                                       |
| 27   | 5      | 22     | 27    | 6       | 21      | 1306.78985                               | -0.00001                                                       |
| 30   | 8      | 22     | 30    | 9       | 21      | 1306.79147                               | 0.00002                                                        |
| 30   | 9      | 22     | 30    | 10      | 21      | 1306.79147                               | 0.00002                                                        |
| 32   | 10     | 22     | 32    | 11      | 21      | 1306.79288                               | 0.00008                                                        |
| 32   | 11     | 22     | 32    | 12      | 21      | 1306.79288                               | 0.00008                                                        |
| 34   | 12     | 22     | 34    | 13      | 21      | 1306.79430                               | -0.00011                                                       |
| 34   | 13     | 22     | 34    | 14      | 21      | 1306.79430                               | -0.00011                                                       |
| 37   | 16     | 22     | 37    | 17      | 21      | 1306.79736                               | -0.00004                                                       |
| 37   | 15     | 22     | 37    | 16      | 21      | 1306.79736                               | -0.00004                                                       |
| 12   | 6      | 7      | 13    | 5       | 8       | 1306.81496                               | 0.00010                                                        |
| 12   | 5      | 7      | 13    | 6       | 8       | 1306.81496                               | 0.00011                                                        |
| 16   | 1      | 16     | 17    | 0       | 17      | 1306.83321                               | -0.00012                                                       |
| 16   | 0      | 16     | 17    | 1       | 17      | 1306.83321                               | -0.00012                                                       |
| 15   | 1      | 14     | 16    | 2       | 15      | 1306.85339                               | 0.00018                                                        |
| 15   | 2      | 14     | 16    | 1       | 15      | 1306.85339                               | 0.00018                                                        |
| 24   | 3      | 21     | 24    | 4       | 20      | 1306.88587                               | -0.00003                                                       |

Continuation, see next page

Continuation of Table 29:  $\nu_{17} \leftarrow gs$  of dithiine.

| $J'$ | $K'_a$ | $K'_c$ | $J''$ | $K''_a$ | $K''_c$ | $\tilde{\nu}_{obs}$<br>/cm <sup>-1</sup> | $(\tilde{\nu}_{obs} - \tilde{\nu}_{cat})$<br>/cm <sup>-1</sup> |
|------|--------|--------|-------|---------|---------|------------------------------------------|----------------------------------------------------------------|
| 24   | 4      | 21     | 24    | 5       | 20      | 1306.88587                               | -0.00003                                                       |
| 29   | 9      | 21     | 29    | 10      | 20      | 1306.88822                               | -0.00007                                                       |
| 29   | 8      | 21     | 29    | 9       | 20      | 1306.88822                               | -0.00007                                                       |
| 34   | 13     | 21     | 34    | 14      | 20      | 1306.89212                               | -0.00008                                                       |
| 34   | 14     | 21     | 34    | 15      | 20      | 1306.89212                               | -0.00008                                                       |
| 15   | 0      | 15     | 16    | 1       | 16      | 1306.95061                               | 0.00019                                                        |
| 15   | 1      | 15     | 16    | 0       | 16      | 1306.95061                               | 0.00019                                                        |
| 14   | 2      | 13     | 15    | 1       | 14      | 1306.97050                               | 0.00016                                                        |
| 14   | 1      | 13     | 15    | 2       | 14      | 1306.97050                               | 0.00016                                                        |
| 13   | 2      | 11     | 14    | 3       | 12      | 1306.99029                               | 0.00004                                                        |
| 13   | 3      | 11     | 14    | 2       | 12      | 1306.99029                               | 0.00004                                                        |
| 14   | 0      | 14     | 15    | 1       | 15      | 1307.06735                               | -0.00018                                                       |
| 14   | 1      | 14     | 15    | 0       | 15      | 1307.06735                               | -0.00018                                                       |
| 23   | 5      | 19     | 23    | 6       | 18      | 1307.08008                               | -0.00002                                                       |
| 23   | 4      | 19     | 23    | 5       | 18      | 1307.08008                               | -0.00002                                                       |
| 25   | 7      | 19     | 25    | 8       | 18      | 1307.08103                               | 0.00003                                                        |
| 25   | 6      | 19     | 25    | 7       | 18      | 1307.08103                               | 0.00003                                                        |
| 26   | 7      | 19     | 26    | 8       | 18      | 1307.08149                               | -0.00005                                                       |
| 26   | 8      | 19     | 26    | 9       | 18      | 1307.08149                               | -0.00005                                                       |
| 29   | 11     | 19     | 29    | 12      | 18      | 1307.08361                               | 0.00007                                                        |
| 29   | 10     | 19     | 29    | 11      | 18      | 1307.08361                               | 0.00007                                                        |
| 30   | 11     | 19     | 30    | 12      | 18      | 1307.08432                               | -0.00004                                                       |
| 30   | 12     | 19     | 30    | 13      | 18      | 1307.08432                               | -0.00004                                                       |
| 13   | 1      | 12     | 14    | 2       | 13      | 1307.08738                               | -0.00008                                                       |
| 13   | 2      | 12     | 14    | 1       | 13      | 1307.08738                               | -0.00008                                                       |
| 11   | 4      | 8      | 12    | 3       | 9       | 1307.12728                               | 0.00005                                                        |
| 11   | 3      | 8      | 12    | 4       | 9       | 1307.12728                               | 0.00005                                                        |
| 22   | 4      | 18     | 22    | 5       | 17      | 1307.17707                               | 0.00002                                                        |
| 22   | 5      | 18     | 22    | 6       | 17      | 1307.17707                               | 0.00002                                                        |
| 25   | 8      | 18     | 25    | 9       | 17      | 1307.17835                               | -0.00017                                                       |
| 25   | 7      | 18     | 25    | 8       | 17      | 1307.17835                               | -0.00017                                                       |
| 28   | 10     | 18     | 28    | 11      | 17      | 1307.18060                               | -0.00001                                                       |
| 28   | 11     | 18     | 28    | 12      | 17      | 1307.18060                               | -0.00001                                                       |
| 31   | 14     | 18     | 31    | 15      | 17      | 1307.18319                               | -0.00028                                                       |
| 31   | 13     | 18     | 31    | 14      | 17      | 1307.18319                               | -0.00028                                                       |
| 34   | 16     | 18     | 34    | 17      | 17      | 1307.18750                               | 0.00020                                                        |
| 34   | 17     | 18     | 34    | 18      | 17      | 1307.18750                               | 0.00020                                                        |
| 38   | 20     | 18     | 38    | 21      | 17      | 1307.19433                               | 0.00001                                                        |
| 38   | 21     | 18     | 38    | 22      | 17      | 1307.19433                               | 0.00001                                                        |
| 12   | 1      | 11     | 13    | 2       | 12      | 1307.20438                               | -0.00022                                                       |
| 12   | 2      | 11     | 13    | 1       | 12      | 1307.20438                               | -0.00022                                                       |
| 11   | 2      | 9      | 12    | 3       | 10      | 1307.22461                               | 0.00007                                                        |
| 11   | 3      | 9      | 12    | 2       | 10      | 1307.22461                               | 0.00007                                                        |
| 10   | 4      | 7      | 11    | 3       | 8       | 1307.24432                               | -0.00003                                                       |
| 10   | 3      | 7      | 11    | 4       | 8       | 1307.24432                               | -0.00003                                                       |
| 29   | 13     | 17     | 29    | 14      | 16      | 1307.27991                               | 0.00022                                                        |

Continuation, see next page

Continuation of Table 29:  $\nu_{17} \leftarrow gs$  of dithiine.

| $J'$ | $K'_a$ | $K'_c$ | $J''$ | $K''_a$ | $K''_c$ | $\tilde{\nu}_{obs}$<br>/cm <sup>-1</sup> | $(\tilde{\nu}_{obs} - \tilde{\nu}_{cat})$<br>/cm <sup>-1</sup> |
|------|--------|--------|-------|---------|---------|------------------------------------------|----------------------------------------------------------------|
| 29   | 12     | 17     | 29    | 13      | 16      | 1307.27991                               | 0.00022                                                        |
| 34   | 17     | 17     | 34    | 18      | 16      | 1307.28654                               | -0.00011                                                       |
| 34   | 18     | 17     | 34    | 19      | 16      | 1307.28654                               | -0.00011                                                       |
| 12   | 1      | 12     | 13    | 0       | 13      | 1307.30184                               | 0.00006                                                        |
| 12   | 0      | 12     | 13    | 1       | 13      | 1307.30184                               | 0.00006                                                        |
| 11   | 2      | 10     | 12    | 1       | 11      | 1307.32185                               | 0.00010                                                        |
| 11   | 1      | 10     | 12    | 2       | 11      | 1307.32185                               | 0.00010                                                        |
| 10   | 3      | 8      | 11    | 2       | 9       | 1307.34162                               | -0.00007                                                       |
| 10   | 2      | 8      | 11    | 3       | 9       | 1307.34162                               | -0.00007                                                       |
| 20   | 4      | 16     | 20    | 5       | 15      | 1307.37105                               | 0.00001                                                        |
| 20   | 5      | 16     | 20    | 6       | 15      | 1307.37105                               | 0.00001                                                        |
| 26   | 10     | 16     | 26    | 11      | 15      | 1307.37505                               | 0.00004                                                        |
| 26   | 11     | 16     | 26    | 12      | 15      | 1307.37505                               | 0.00004                                                        |
| 29   | 14     | 16     | 29    | 15      | 15      | 1307.37835                               | 0.00001                                                        |
| 29   | 13     | 16     | 29    | 14      | 15      | 1307.37835                               | 0.00001                                                        |
| 30   | 14     | 16     | 30    | 15      | 15      | 1307.37964                               | -0.00008                                                       |
| 30   | 15     | 16     | 30    | 16      | 15      | 1307.37964                               | -0.00008                                                       |
| 31   | 16     | 16     | 31    | 17      | 15      | 1307.38125                               | 0.00001                                                        |
| 31   | 15     | 16     | 31    | 16      | 15      | 1307.38125                               | 0.00001                                                        |
| 11   | 1      | 11     | 12    | 0       | 12      | 1307.41869                               | -0.00023                                                       |
| 11   | 0      | 11     | 12    | 1       | 12      | 1307.41869                               | -0.00023                                                       |
| 10   | 1      | 9      | 11    | 2       | 10      | 1307.43861                               | -0.00029                                                       |
| 10   | 2      | 9      | 11    | 1       | 10      | 1307.43861                               | -0.00029                                                       |
| 6    | 5      | 1      | 7     | 6       | 2       | 1307.44096                               | 0.00006                                                        |
| 9    | 2      | 7      | 10    | 3       | 8       | 1307.45890                               | 0.00007                                                        |
| 9    | 3      | 7      | 10    | 2       | 8       | 1307.45890                               | 0.00007                                                        |
| 17   | 3      | 15     | 17    | 4       | 14      | 1307.46733                               | 0.00003                                                        |
| 17   | 2      | 15     | 17    | 3       | 14      | 1307.46733                               | 0.00003                                                        |
| 18   | 3      | 15     | 18    | 4       | 14      | 1307.46764                               | -0.00002                                                       |
| 18   | 4      | 15     | 18    | 5       | 14      | 1307.46764                               | -0.00002                                                       |
| 19   | 5      | 15     | 19    | 6       | 14      | 1307.46804                               | -0.00004                                                       |
| 19   | 4      | 15     | 19    | 5       | 14      | 1307.46804                               | -0.00004                                                       |
| 22   | 7      | 15     | 22    | 8       | 14      | 1307.46978                               | -0.00002                                                       |
| 22   | 8      | 15     | 22    | 9       | 14      | 1307.46978                               | -0.00002                                                       |
| 26   | 11     | 15     | 26    | 12      | 14      | 1307.47345                               | -0.00001                                                       |
| 26   | 12     | 15     | 26    | 13      | 14      | 1307.47345                               | -0.00001                                                       |
| 28   | 13     | 15     | 28    | 14      | 14      | 1307.47604                               | -0.00002                                                       |
| 28   | 14     | 15     | 28    | 15      | 14      | 1307.47604                               | -0.00002                                                       |
| 8    | 4      | 5      | 9     | 3       | 6       | 1307.47863                               | 0.00012                                                        |
| 8    | 3      | 5      | 9     | 4       | 6       | 1307.47863                               | 0.00019                                                        |
| 9    | 2      | 8      | 10    | 1       | 9       | 1307.55615                               | 0.00010                                                        |
| 9    | 1      | 8      | 10    | 2       | 9       | 1307.55615                               | 0.00010                                                        |
| 17   | 4      | 14     | 17    | 5       | 13      | 1307.56455                               | -0.00015                                                       |
| 17   | 3      | 14     | 17    | 4       | 13      | 1307.56455                               | -0.00015                                                       |
| 20   | 6      | 14     | 20    | 7       | 13      | 1307.56626                               | -0.00003                                                       |
| 20   | 7      | 14     | 20    | 8       | 13      | 1307.56626                               | -0.00003                                                       |

Continuation, see next page

Continuation of Table 29:  $\nu_{17} \leftarrow gs$  of dithiine.

| $J'$ | $K'_a$ | $K'_c$ | $J''$ | $K''_a$ | $K''_c$ | $\tilde{\nu}_{obs}$<br>/cm <sup>-1</sup> | $(\tilde{\nu}_{obs} - \tilde{\nu}_{cat})$<br>/cm <sup>-1</sup> |
|------|--------|--------|-------|---------|---------|------------------------------------------|----------------------------------------------------------------|
| 24   | 10     | 14     | 24    | 11      | 13      | 1307.56969                               | -0.00017                                                       |
| 24   | 11     | 14     | 24    | 12      | 13      | 1307.56969                               | -0.00017                                                       |
| 25   | 12     | 14     | 25    | 13      | 13      | 1307.57115                               | 0.00007                                                        |
| 25   | 11     | 14     | 25    | 12      | 13      | 1307.57115                               | 0.00007                                                        |
| 26   | 12     | 14     | 26    | 13      | 13      | 1307.57265                               | 0.00018                                                        |
| 26   | 13     | 14     | 26    | 14      | 13      | 1307.57265                               | 0.00018                                                        |
| 28   | 14     | 14     | 28    | 15      | 13      | 1307.57592                               | 0.00013                                                        |
| 28   | 15     | 14     | 28    | 16      | 13      | 1307.57592                               | 0.00013                                                        |
| 32   | 18     | 14     | 32    | 19      | 13      | 1307.58503                               | -0.00012                                                       |
| 32   | 19     | 14     | 32    | 20      | 13      | 1307.58503                               | -0.00011                                                       |
| 20   | 7      | 13     | 20    | 8       | 12      | 1307.66437                               | 0.00007                                                        |
| 20   | 8      | 13     | 20    | 9       | 12      | 1307.66437                               | 0.00007                                                        |
| 22   | 9      | 13     | 22    | 10      | 12      | 1307.66625                               | -0.00004                                                       |
| 22   | 10     | 13     | 22    | 11      | 12      | 1307.66625                               | -0.00004                                                       |
| 24   | 11     | 13     | 24    | 12      | 12      | 1307.66899                               | 0.00007                                                        |
| 24   | 12     | 13     | 24    | 13      | 12      | 1307.66899                               | 0.00007                                                        |
| 17   | 6      | 12     | 17    | 7       | 11      | 1307.75994                               | -0.00009                                                       |
| 17   | 5      | 12     | 17    | 6       | 11      | 1307.75994                               | -0.00009                                                       |
| 21   | 10     | 12     | 21    | 11      | 11      | 1307.76395                               | -0.00003                                                       |
| 21   | 9      | 12     | 21    | 10      | 11      | 1307.76395                               | -0.00003                                                       |
| 23   | 12     | 12     | 23    | 13      | 11      | 1307.76701                               | -0.00004                                                       |
| 23   | 11     | 12     | 23    | 12      | 11      | 1307.76701                               | -0.00004                                                       |
| 8    | 0      | 8      | 9     | 1       | 9       | 1307.77007                               | -0.00028                                                       |
| 8    | 1      | 8      | 9     | 0       | 9       | 1307.77007                               | -0.00028                                                       |
| 7    | 2      | 6      | 8     | 1       | 7       | 1307.79018                               | -0.00018                                                       |
| 7    | 1      | 6      | 8     | 2       | 7       | 1307.79018                               | -0.00018                                                       |
| 11   | 1      | 11     | 11    | 2       | 10      | 1307.85481                               | 0.00001                                                        |
| 11   | 0      | 11     | 11    | 1       | 10      | 1307.85481                               | 0.00001                                                        |
| 12   | 1      | 11     | 12    | 2       | 10      | 1307.85505                               | -0.00005                                                       |
| 12   | 2      | 11     | 12    | 3       | 10      | 1307.85505                               | -0.00005                                                       |
| 13   | 3      | 11     | 13    | 4       | 10      | 1307.85544                               | -0.00005                                                       |
| 13   | 2      | 11     | 13    | 3       | 10      | 1307.85544                               | -0.00005                                                       |
| 14   | 3      | 11     | 14    | 4       | 10      | 1307.85599                               | 0.00002                                                        |
| 14   | 4      | 11     | 14    | 5       | 10      | 1307.85599                               | 0.00002                                                        |
| 19   | 9      | 11     | 19    | 10      | 10      | 1307.86046                               | 0.00001                                                        |
| 19   | 8      | 11     | 19    | 9       | 10      | 1307.86046                               | 0.00001                                                        |
| 22   | 11     | 11     | 22    | 12      | 10      | 1307.86564                               | 0.00006                                                        |
| 22   | 12     | 11     | 22    | 13      | 10      | 1307.86564                               | 0.00006                                                        |
| 6    | 2      | 5      | 7     | 1       | 6       | 1307.90748                               | -0.00004                                                       |
| 6    | 1      | 5      | 7     | 2       | 6       | 1307.90748                               | -0.00004                                                       |
| 16   | 6      | 10     | 16    | 7       | 9       | 1307.95580                               | 0.00013                                                        |
| 16   | 7      | 10     | 16    | 8       | 9       | 1307.95580                               | 0.00013                                                        |
| 18   | 8      | 10     | 18    | 9       | 9       | 1307.95829                               | -0.00011                                                       |
| 18   | 9      | 10     | 18    | 10      | 9       | 1307.95829                               | -0.00011                                                       |
| 19   | 10     | 10     | 19    | 11      | 9       | 1307.96004                               | -0.00012                                                       |
| 19   | 9      | 10     | 19    | 10      | 9       | 1307.96004                               | -0.00013                                                       |

Continuation, see next page

Continuation of Table 29:  $\nu_{17} \leftarrow gs$  of dithiine.

| $J'$ | $K'_a$ | $K'_c$ | $J''$ | $K''_a$ | $K''_c$ | $\tilde{\nu}_{obs}$<br>/cm <sup>-1</sup> | $(\tilde{\nu}_{obs} - \tilde{\nu}_{cal})$<br>/cm <sup>-1</sup> |
|------|--------|--------|-------|---------|---------|------------------------------------------|----------------------------------------------------------------|
| 20   | 10     | 10     | 20    | 11      | 9       | 1307.96223                               | -0.00004                                                       |
| 20   | 11     | 10     | 20    | 12      | 9       | 1307.96223                               | -0.00001                                                       |
| 21   | 12     | 10     | 21    | 13      | 9       | 1307.96475                               | 0.00008                                                        |
| 21   | 11     | 10     | 21    | 12      | 9       | 1307.96475                               | 0.00000                                                        |
| 22   | 13     | 10     | 22    | 14      | 9       | 1307.96737                               | -0.00013                                                       |
| 6    | 0      | 6      | 7     | 1       | 7       | 1308.00481                               | 0.00015                                                        |
| 6    | 1      | 6      | 7     | 0       | 7       | 1308.00481                               | 0.00015                                                        |
| 5    | 1      | 4      | 6     | 2       | 5       | 1308.02455                               | -0.00009                                                       |
| 5    | 2      | 4      | 6     | 1       | 5       | 1308.02478                               | 0.00010                                                        |
| 3    | 3      | 0      | 4     | 4       | 1       | 1308.02929                               | -0.00005                                                       |
| 4    | 3      | 2      | 5     | 2       | 3       | 1308.05115                               | 0.00003                                                        |
| 11   | 3      | 8      | 11    | 4       | 7       | 1308.14766                               | 0.00007                                                        |
| 11   | 4      | 8      | 11    | 5       | 7       | 1308.14766                               | 0.00007                                                        |
| 17   | 10     | 8      | 17    | 11      | 7       | 1308.15825                               | 0.00000                                                        |
| 17   | 9      | 8      | 17    | 10      | 7       | 1308.15909                               | 0.00007                                                        |
| 19   | 12     | 8      | 19    | 13      | 7       | 1308.16482                               | -0.00011                                                       |
| 24   | 17     | 8      | 24    | 18      | 7       | 1308.17916                               | -0.00031                                                       |
| 5    | 2      | 4      | 4     | 1       | 3       | 1309.60461                               | -0.00012                                                       |
| 22   | 15     | 8      | 22    | 14      | 9       | 1309.65583                               | 0.00003                                                        |
| 21   | 13     | 8      | 21    | 12      | 9       | 1309.66110                               | -0.00019                                                       |
| 21   | 14     | 8      | 21    | 13      | 9       | 1309.66299                               | 0.00013                                                        |
| 20   | 13     | 8      | 20    | 12      | 9       | 1309.66911                               | 0.00000                                                        |
| 19   | 11     | 8      | 19    | 10      | 9       | 1309.67389                               | -0.00031                                                       |
| 13   | 5      | 8      | 13    | 4       | 9       | 1309.69336                               | 0.00016                                                        |
| 13   | 6      | 8      | 13    | 5       | 9       | 1309.69336                               | 0.00016                                                        |
| 12   | 4      | 8      | 12    | 3       | 9       | 1309.69479                               | 0.00014                                                        |
| 12   | 5      | 8      | 12    | 4       | 9       | 1309.69479                               | 0.00014                                                        |
| 7    | 1      | 7      | 6     | 0       | 6       | 1309.74191                               | 0.00018                                                        |
| 7    | 0      | 7      | 6     | 1       | 6       | 1309.74191                               | 0.00018                                                        |
| 6    | 2      | 4      | 5     | 3       | 3       | 1309.81789                               | -0.00001                                                       |
| 6    | 3      | 4      | 5     | 2       | 3       | 1309.81977                               | 0.00000                                                        |
| 25   | 16     | 10     | 25    | 15      | 11      | 1309.85394                               | 0.00003                                                        |
| 8    | 0      | 8      | 7     | 1       | 7       | 1309.85864                               | -0.00022                                                       |
| 8    | 1      | 8      | 7     | 0       | 7       | 1309.85864                               | -0.00022                                                       |
| 19   | 10     | 10     | 19    | 9       | 11      | 1309.87968                               | -0.00015                                                       |
| 19   | 9      | 10     | 19    | 8       | 11      | 1309.87968                               | -0.00015                                                       |
| 17   | 8      | 10     | 17    | 7       | 11      | 1309.88421                               | -0.00024                                                       |
| 17   | 7      | 10     | 17    | 6       | 11      | 1309.88421                               | -0.00024                                                       |
| 14   | 5      | 10     | 14    | 4       | 11      | 1309.88874                               | -0.00020                                                       |
| 14   | 4      | 10     | 14    | 3       | 11      | 1309.88874                               | -0.00020                                                       |
| 13   | 4      | 10     | 13    | 3       | 11      | 1309.89016                               | 0.00022                                                        |
| 13   | 3      | 10     | 13    | 2       | 11      | 1309.89016                               | 0.00022                                                        |
| 18   | 8      | 11     | 18    | 7       | 12      | 1309.98197                               | 0.00010                                                        |
| 18   | 7      | 11     | 18    | 6       | 12      | 1309.98197                               | 0.00010                                                        |
| 17   | 7      | 11     | 17    | 6       | 12      | 1309.98361                               | 0.00010                                                        |
| 17   | 6      | 11     | 17    | 5       | 12      | 1309.98361                               | 0.00010                                                        |

Continuation, see next page

Continuation of Table 29:  $\nu_{17} \leftarrow gs$  of dithiine.

| $J'$ | $K'_a$ | $K'_c$ | $J''$ | $K''_a$ | $K''_c$ | $\tilde{\nu}_{obs}$<br>/cm <sup>-1</sup> | $(\tilde{\nu}_{obs} - \tilde{\nu}_{cat})$<br>/cm <sup>-1</sup> |
|------|--------|--------|-------|---------|---------|------------------------------------------|----------------------------------------------------------------|
| 13   | 3      | 11     | 13    | 2       | 12      | 1309.98785                               | 0.00008                                                        |
| 13   | 2      | 11     | 13    | 1       | 12      | 1309.98785                               | 0.00008                                                        |
| 8    | 2      | 6      | 7     | 3       | 5       | 1310.05258                               | -0.00018                                                       |
| 8    | 3      | 6      | 7     | 2       | 5       | 1310.05258                               | -0.00020                                                       |
| 25   | 13     | 12     | 25    | 12      | 13      | 1310.06369                               | -0.00011                                                       |
| 25   | 14     | 12     | 25    | 13      | 13      | 1310.06369                               | -0.00011                                                       |
| 23   | 12     | 12     | 23    | 11      | 13      | 1310.07048                               | 0.00012                                                        |
| 23   | 11     | 12     | 23    | 10      | 13      | 1310.07048                               | 0.00012                                                        |
| 22   | 11     | 12     | 22    | 10      | 13      | 1310.07307                               | 0.00002                                                        |
| 22   | 10     | 12     | 22    | 9       | 13      | 1310.07307                               | 0.00002                                                        |
| 16   | 5      | 12     | 16    | 4       | 13      | 1310.08319                               | 0.00007                                                        |
| 16   | 4      | 12     | 16    | 3       | 13      | 1310.08319                               | 0.00007                                                        |
| 15   | 4      | 12     | 15    | 3       | 13      | 1310.08413                               | 0.00009                                                        |
| 15   | 3      | 12     | 15    | 2       | 13      | 1310.08413                               | 0.00009                                                        |
| 23   | 11     | 13     | 23    | 10      | 14      | 1310.17076                               | -0.00006                                                       |
| 23   | 10     | 13     | 23    | 9       | 14      | 1310.17076                               | -0.00006                                                       |
| 21   | 9      | 13     | 21    | 8       | 14      | 1310.17488                               | 0.00002                                                        |
| 21   | 8      | 13     | 21    | 7       | 14      | 1310.17488                               | 0.00002                                                        |
| 15   | 2      | 13     | 15    | 1       | 14      | 1310.18183                               | 0.00000                                                        |
| 15   | 3      | 13     | 15    | 2       | 14      | 1310.18183                               | 0.00000                                                        |
| 10   | 1      | 9      | 9     | 2       | 8       | 1310.19030                               | 0.00027                                                        |
| 10   | 2      | 9      | 9     | 1       | 8       | 1310.19030                               | 0.00027                                                        |
| 11   | 1      | 11     | 10    | 0       | 10      | 1310.21008                               | -0.00019                                                       |
| 11   | 0      | 11     | 10    | 1       | 10      | 1310.21008                               | -0.00019                                                       |
| 29   | 16     | 14     | 29    | 15      | 15      | 1310.25437                               | 0.00027                                                        |
| 29   | 15     | 14     | 29    | 14      | 15      | 1310.25437                               | 0.00027                                                        |
| 27   | 14     | 14     | 27    | 13      | 15      | 1310.26093                               | 0.00010                                                        |
| 27   | 13     | 14     | 27    | 12      | 15      | 1310.26093                               | 0.00010                                                        |
| 26   | 12     | 14     | 26    | 11      | 15      | 1310.26352                               | -0.00015                                                       |
| 26   | 13     | 14     | 26    | 12      | 15      | 1310.26352                               | -0.00015                                                       |
| 10   | 2      | 8      | 9     | 3       | 7       | 1310.28694                               | 0.00000                                                        |
| 10   | 3      | 8      | 9     | 2       | 7       | 1310.28694                               | 0.00000                                                        |
| 11   | 2      | 10     | 10    | 1       | 9       | 1310.30687                               | -0.00029                                                       |
| 11   | 1      | 10     | 10    | 2       | 9       | 1310.30687                               | -0.00029                                                       |
| 12   | 0      | 12     | 11    | 1       | 11      | 1310.32724                               | -0.00017                                                       |
| 12   | 1      | 12     | 11    | 0       | 11      | 1310.32724                               | -0.00017                                                       |
| 33   | 18     | 15     | 33    | 17      | 16      | 1310.34120                               | 0.00017                                                        |
| 33   | 19     | 15     | 33    | 18      | 16      | 1310.34120                               | 0.00017                                                        |
| 32   | 17     | 15     | 32    | 16      | 16      | 1310.34569                               | 0.00032                                                        |
| 32   | 18     | 15     | 32    | 17      | 16      | 1310.34569                               | 0.00032                                                        |
| 26   | 11     | 15     | 26    | 10      | 16      | 1310.36407                               | 0.00013                                                        |
| 26   | 12     | 15     | 26    | 11      | 16      | 1310.36407                               | 0.00013                                                        |
| 22   | 8      | 15     | 22    | 7       | 16      | 1310.37084                               | -0.00015                                                       |
| 22   | 7      | 15     | 22    | 6       | 16      | 1310.37084                               | -0.00015                                                       |
| 21   | 6      | 15     | 21    | 5       | 16      | 1310.37227                               | 0.00000                                                        |
| 21   | 7      | 15     | 21    | 6       | 16      | 1310.37227                               | 0.00000                                                        |

Continuation, see next page

Continuation of Table 29:  $\nu_{17} \leftarrow gs$  of dithiine.

| $J'$ | $K'_a$ | $K'_c$ | $J''$ | $K''_a$ | $K''_c$ | $\bar{\nu}_{obs}$<br>/cm <sup>-1</sup> | $(\bar{\nu}_{obs} - \bar{\nu}_{cat})$<br>/cm <sup>-1</sup> |
|------|--------|--------|-------|---------|---------|----------------------------------------|------------------------------------------------------------|
| 20   | 5      | 15     | 20    | 4       | 16      | 1310.37345                             | 0.00006                                                    |
| 20   | 6      | 15     | 20    | 5       | 16      | 1310.37345                             | 0.00006                                                    |
| 19   | 4      | 15     | 19    | 3       | 16      | 1310.37451                             | 0.00015                                                    |
| 19   | 5      | 15     | 19    | 4       | 16      | 1310.37451                             | 0.00015                                                    |
| 17   | 3      | 15     | 17    | 2       | 16      | 1310.37597                             | 0.00006                                                    |
| 17   | 2      | 15     | 17    | 1       | 16      | 1310.37597                             | 0.00006                                                    |
| 10   | 3      | 7      | 9     | 4       | 6       | 1310.38404                             | 0.00012                                                    |
| 10   | 4      | 7      | 9     | 3       | 6       | 1310.38404                             | 0.00012                                                    |
| 11   | 3      | 9      | 10    | 2       | 8       | 1310.40405                             | 0.00001                                                    |
| 11   | 2      | 9      | 10    | 3       | 8       | 1310.40405                             | 0.00001                                                    |
| 12   | 1      | 11     | 11    | 2       | 10      | 1310.42430                             | 0.00001                                                    |
| 12   | 2      | 11     | 11    | 1       | 10      | 1310.42430                             | 0.00001                                                    |
| 33   | 17     | 16     | 33    | 16      | 17      | 1310.44424                             | -0.00031                                                   |
| 33   | 18     | 16     | 33    | 17      | 17      | 1310.44424                             | -0.00031                                                   |
| 32   | 17     | 16     | 32    | 16      | 17      | 1310.44808                             | -0.00005                                                   |
| 32   | 16     | 16     | 32    | 15      | 17      | 1310.44808                             | -0.00005                                                   |
| 31   | 16     | 16     | 31    | 15      | 17      | 1310.45137                             | -0.00001                                                   |
| 31   | 15     | 16     | 31    | 14      | 17      | 1310.45137                             | -0.00001                                                   |
| 25   | 10     | 16     | 25    | 9       | 17      | 1310.46526                             | -0.00002                                                   |
| 25   | 9      | 16     | 25    | 8       | 17      | 1310.46526                             | -0.00002                                                   |
| 24   | 9      | 16     | 24    | 8       | 17      | 1310.46667                             | -0.00016                                                   |
| 24   | 8      | 16     | 24    | 7       | 17      | 1310.46667                             | -0.00016                                                   |
| 23   | 8      | 16     | 23    | 7       | 17      | 1310.46828                             | 0.00007                                                    |
| 23   | 7      | 16     | 23    | 6       | 17      | 1310.46828                             | 0.00007                                                    |
| 22   | 6      | 16     | 22    | 5       | 17      | 1310.46950                             | 0.00007                                                    |
| 22   | 7      | 16     | 22    | 6       | 17      | 1310.46950                             | 0.00007                                                    |
| 12   | 2      | 10     | 11    | 3       | 9       | 1310.52128                             | 0.00013                                                    |
| 12   | 3      | 10     | 11    | 2       | 9       | 1310.52128                             | 0.00013                                                    |
| 35   | 19     | 17     | 35    | 18      | 18      | 1310.53989                             | 0.00000                                                    |
| 35   | 18     | 17     | 35    | 17      | 18      | 1310.53989                             | 0.00000                                                    |
| 33   | 17     | 17     | 33    | 16      | 18      | 1310.54671                             | -0.00002                                                   |
| 33   | 16     | 17     | 33    | 15      | 18      | 1310.54671                             | -0.00002                                                   |
| 32   | 15     | 17     | 32    | 14      | 18      | 1310.54977                             | 0.00006                                                    |
| 32   | 16     | 17     | 32    | 15      | 18      | 1310.54977                             | 0.00006                                                    |
| 30   | 13     | 17     | 30    | 12      | 18      | 1310.55495                             | 0.00004                                                    |
| 30   | 14     | 17     | 30    | 13      | 18      | 1310.55495                             | 0.00004                                                    |
| 29   | 13     | 17     | 29    | 12      | 18      | 1310.55703                             | -0.00012                                                   |
| 29   | 12     | 17     | 29    | 11      | 18      | 1310.55703                             | -0.00012                                                   |
| 14   | 0      | 14     | 13    | 1       | 13      | 1310.56186                             | 0.00015                                                    |
| 14   | 1      | 14     | 13    | 0       | 13      | 1310.56186                             | 0.00015                                                    |
| 21   | 4      | 17     | 21    | 3       | 18      | 1310.56861                             | 0.00007                                                    |
| 21   | 5      | 17     | 21    | 4       | 18      | 1310.56861                             | 0.00007                                                    |
| 19   | 2      | 17     | 19    | 1       | 18      | 1310.56978                             | -0.00026                                                   |
| 19   | 3      | 17     | 19    | 2       | 18      | 1310.56978                             | -0.00026                                                   |
| 11   | 5      | 7      | 10    | 4       | 6       | 1310.59799                             | -0.00006                                                   |
| 11   | 4      | 7      | 10    | 5       | 6       | 1310.59799                             | -0.00004                                                   |

Continuation, see next page

Continuation of Table 29:  $\nu_{17} \leftarrow gs$  of dithiine.

| $J'$ | $K'_a$ | $K'_c$ | $J''$ | $K''_a$ | $K''_c$ | $\tilde{\nu}_{obs}$<br>/cm <sup>-1</sup> | $(\tilde{\nu}_{obs} - \tilde{\nu}_{cat})$<br>/cm <sup>-1</sup> |
|------|--------|--------|-------|---------|---------|------------------------------------------|----------------------------------------------------------------|
| 13   | 3      | 11     | 12    | 2       | 10      | 1310.63829                               | 0.00002                                                        |
| 13   | 2      | 11     | 12    | 3       | 10      | 1310.63829                               | 0.00002                                                        |
| 25   | 7      | 18     | 25    | 6       | 19      | 1310.66276                               | 0.00011                                                        |
| 25   | 8      | 18     | 25    | 7       | 19      | 1310.66276                               | 0.00011                                                        |
| 23   | 5      | 18     | 23    | 4       | 19      | 1310.66489                               | 0.00012                                                        |
| 23   | 6      | 18     | 23    | 5       | 19      | 1310.66489                               | 0.00012                                                        |
| 22   | 5      | 18     | 22    | 4       | 19      | 1310.66558                               | -0.00007                                                       |
| 22   | 4      | 18     | 22    | 3       | 19      | 1310.66558                               | -0.00007                                                       |
| 21   | 4      | 18     | 21    | 3       | 19      | 1310.66630                               | -0.00014                                                       |
| 21   | 3      | 18     | 21    | 2       | 19      | 1310.66630                               | -0.00014                                                       |
| 15   | 1      | 15     | 14    | 0       | 14      | 1310.67911                               | 0.00025                                                        |
| 15   | 0      | 15     | 14    | 1       | 14      | 1310.67911                               | 0.00025                                                        |
| 14   | 2      | 12     | 13    | 3       | 11      | 1310.75528                               | -0.00011                                                       |
| 14   | 3      | 12     | 13    | 2       | 11      | 1310.75528                               | -0.00011                                                       |
| 29   | 11     | 19     | 29    | 10      | 20      | 1310.75577                               | -0.00012                                                       |
| 29   | 10     | 19     | 29    | 9       | 20      | 1310.75577                               | -0.00012                                                       |
| 28   | 9      | 19     | 28    | 8       | 20      | 1310.75764                               | 0.00028                                                        |
| 28   | 10     | 19     | 28    | 9       | 20      | 1310.75764                               | 0.00028                                                        |
| 27   | 8      | 19     | 27    | 7       | 20      | 1310.75882                               | 0.00013                                                        |
| 27   | 9      | 19     | 27    | 8       | 20      | 1310.75882                               | 0.00013                                                        |
| 25   | 6      | 19     | 25    | 5       | 20      | 1310.76093                               | -0.00003                                                       |
| 25   | 7      | 19     | 25    | 6       | 20      | 1310.76093                               | -0.00003                                                       |
| 23   | 4      | 19     | 23    | 3       | 20      | 1310.76284                               | 0.00006                                                        |
| 15   | 2      | 14     | 14    | 1       | 13      | 1310.77544                               | -0.00026                                                       |
| 15   | 1      | 14     | 14    | 2       | 13      | 1310.77544                               | -0.00026                                                       |
| 16   | 0      | 16     | 15    | 1       | 15      | 1310.79629                               | 0.00026                                                        |
| 16   | 1      | 16     | 15    | 0       | 15      | 1310.79629                               | 0.00026                                                        |
| 13   | 5      | 9      | 12    | 4       | 8       | 1310.83208                               | 0.00004                                                        |
| 13   | 4      | 9      | 12    | 5       | 8       | 1310.83208                               | 0.00004                                                        |
| 35   | 16     | 20     | 35    | 15      | 21      | 1310.84410                               | 0.00001                                                        |
| 35   | 15     | 20     | 35    | 14      | 21      | 1310.84410                               | 0.00001                                                        |
| 33   | 14     | 20     | 33    | 13      | 21      | 1310.84848                               | 0.00021                                                        |
| 33   | 13     | 20     | 33    | 12      | 21      | 1310.84848                               | 0.00021                                                        |
| 31   | 12     | 20     | 31    | 11      | 21      | 1310.85204                               | 0.00025                                                        |
| 31   | 11     | 20     | 31    | 10      | 21      | 1310.85204                               | 0.00025                                                        |
| 14   | 3      | 11     | 13    | 4       | 10      | 1310.85227                               | 0.00004                                                        |
| 14   | 4      | 11     | 13    | 3       | 10      | 1310.85227                               | 0.00004                                                        |
| 30   | 11     | 20     | 30    | 10      | 21      | 1310.85321                               | -0.00011                                                       |
| 30   | 10     | 20     | 30    | 9       | 21      | 1310.85321                               | -0.00011                                                       |
| 24   | 5      | 20     | 24    | 4       | 21      | 1310.85981                               | -0.00012                                                       |
| 24   | 4      | 20     | 24    | 3       | 21      | 1310.85981                               | -0.00012                                                       |
| 23   | 4      | 20     | 23    | 3       | 21      | 1310.86075                               | 0.00008                                                        |
| 23   | 3      | 20     | 23    | 2       | 21      | 1310.86075                               | 0.00008                                                        |
| 22   | 2      | 20     | 22    | 1       | 21      | 1310.86140                               | 0.00006                                                        |
| 22   | 3      | 20     | 22    | 2       | 21      | 1310.86140                               | 0.00006                                                        |
| 21   | 2      | 20     | 21    | 1       | 21      | 1310.86192                               | 0.00000                                                        |

Continuation, see next page

Continuation of Table 29:  $\nu_{17} \leftarrow gs$  of dithiine.

| $J'$ | $K'_a$ | $K'_c$ | $J''$ | $K''_a$ | $K''_c$ | $\bar{\nu}_{obs}$<br>/cm <sup>-1</sup> | $(\bar{\nu}_{obs} - \bar{\nu}_{cat})$<br>/cm <sup>-1</sup> |
|------|--------|--------|-------|---------|---------|----------------------------------------|------------------------------------------------------------|
| 21   | 1      | 20     | 21    | 0       | 21      | 1310.86192                             | 0.00000                                                    |
| 15   | 3      | 13     | 14    | 2       | 12      | 1310.87241                             | -0.00012                                                   |
| 15   | 2      | 13     | 14    | 3       | 12      | 1310.87241                             | -0.00012                                                   |
| 16   | 1      | 15     | 15    | 2       | 14      | 1310.89278                             | -0.00007                                                   |
| 16   | 2      | 15     | 15    | 1       | 14      | 1310.89278                             | -0.00007                                                   |
| 17   | 1      | 17     | 16    | 0       | 16      | 1310.91300                             | -0.00020                                                   |
| 17   | 0      | 17     | 16    | 1       | 16      | 1310.91300                             | -0.00020                                                   |
| 35   | 14     | 21     | 35    | 13      | 22      | 1310.94405                             | -0.00008                                                   |
| 35   | 15     | 21     | 35    | 14      | 22      | 1310.94405                             | -0.00008                                                   |
| 14   | 4      | 10     | 13    | 5       | 9       | 1310.94892                             | -0.00018                                                   |
| 14   | 5      | 10     | 13    | 4       | 9       | 1310.94892                             | -0.00018                                                   |
| 32   | 12     | 21     | 32    | 11      | 22      | 1310.94926                             | -0.00006                                                   |
| 32   | 11     | 21     | 32    | 10      | 22      | 1310.94926                             | -0.00006                                                   |
| 31   | 11     | 21     | 31    | 10      | 22      | 1310.95067                             | -0.00010                                                   |
| 31   | 10     | 21     | 31    | 9       | 22      | 1310.95067                             | -0.00010                                                   |
| 30   | 9      | 21     | 30    | 8       | 22      | 1310.95209                             | 0.00000                                                    |
| 30   | 10     | 21     | 30    | 9       | 22      | 1310.95209                             | 0.00000                                                    |
| 29   | 8      | 21     | 29    | 7       | 22      | 1310.95326                             | -0.00004                                                   |
| 29   | 9      | 21     | 29    | 8       | 22      | 1310.95326                             | -0.00004                                                   |
| 26   | 5      | 21     | 26    | 4       | 22      | 1310.95632                             | 0.00003                                                    |
| 26   | 6      | 21     | 26    | 5       | 22      | 1310.95632                             | 0.00003                                                    |
| 25   | 4      | 21     | 25    | 3       | 22      | 1310.95703                             | -0.00007                                                   |
| 25   | 5      | 21     | 25    | 4       | 22      | 1310.95703                             | -0.00007                                                   |
| 15   | 4      | 12     | 14    | 3       | 11      | 1310.96957                             | 0.00022                                                    |
| 15   | 3      | 12     | 14    | 4       | 11      | 1310.96957                             | 0.00022                                                    |
| 16   | 2      | 14     | 15    | 3       | 13      | 1310.98952                             | -0.00014                                                   |
| 16   | 3      | 14     | 15    | 2       | 13      | 1310.98952                             | -0.00014                                                   |
| 18   | 0      | 18     | 17    | 1       | 17      | 1311.03035                             | -0.00003                                                   |
| 18   | 1      | 18     | 17    | 0       | 17      | 1311.03035                             | -0.00003                                                   |
| 38   | 17     | 22     | 38    | 16      | 23      | 1311.03804                             | 0.00001                                                    |
| 38   | 16     | 22     | 38    | 15      | 23      | 1311.03804                             | 0.00001                                                    |
| 37   | 16     | 22     | 37    | 15      | 23      | 1311.03990                             | -0.00019                                                   |
| 37   | 15     | 22     | 37    | 14      | 23      | 1311.03990                             | -0.00019                                                   |
| 35   | 14     | 22     | 35    | 13      | 23      | 1311.04390                             | 0.00016                                                    |
| 35   | 13     | 22     | 35    | 12      | 23      | 1311.04390                             | 0.00016                                                    |
| 34   | 12     | 22     | 34    | 11      | 23      | 1311.04523                             | -0.00014                                                   |
| 34   | 13     | 22     | 34    | 12      | 23      | 1311.04523                             | -0.00014                                                   |
| 29   | 8      | 22     | 29    | 7       | 23      | 1311.05166                             | -0.00002                                                   |
| 29   | 7      | 22     | 29    | 6       | 23      | 1311.05166                             | -0.00002                                                   |
| 28   | 6      | 22     | 28    | 5       | 23      | 1311.05261                             | -0.00003                                                   |
| 28   | 7      | 22     | 28    | 6       | 23      | 1311.05261                             | -0.00003                                                   |
| 24   | 3      | 22     | 24    | 2       | 23      | 1311.05552                             | -0.00011                                                   |
| 24   | 2      | 22     | 24    | 1       | 23      | 1311.05552                             | -0.00011                                                   |
| 15   | 5      | 11     | 14    | 4       | 10      | 1311.06626                             | 0.00008                                                    |
| 15   | 4      | 11     | 14    | 5       | 10      | 1311.06626                             | 0.00008                                                    |
| 16   | 3      | 13     | 15    | 4       | 12      | 1311.08650                             | 0.00003                                                    |

Continuation, see next page

Continuation of Table 29:  $\nu_{17} \leftarrow gs$  of dithiine.

| $J'$ | $K'_a$ | $K'_c$ | $J''$ | $K''_a$ | $K''_c$ | $\bar{\nu}_{obs}$<br>/cm <sup>-1</sup> | $(\bar{\nu}_{obs} - \bar{\nu}_{cat})$<br>/cm <sup>-1</sup> |
|------|--------|--------|-------|---------|---------|----------------------------------------|------------------------------------------------------------|
| 16   | 4      | 13     | 15    | 3       | 12      | 1311.08650                             | 0.00003                                                    |
| 17   | 3      | 15     | 16    | 2       | 14      | 1311.10677                             | -0.00004                                                   |
| 17   | 2      | 15     | 16    | 3       | 14      | 1311.10677                             | -0.00004                                                   |
| 13   | 7      | 6      | 12    | 8       | 5       | 1311.12323                             | -0.00019                                                   |
| 18   | 1      | 17     | 17    | 2       | 16      | 1311.12746                             | 0.00028                                                    |
| 18   | 2      | 17     | 17    | 1       | 16      | 1311.12746                             | 0.00028                                                    |
| 13   | 8      | 6      | 12    | 7       | 5       | 1311.12746                             | 0.00002                                                    |
| 19   | 1      | 19     | 18    | 0       | 18      | 1311.14755                             | -0.00002                                                   |
| 19   | 0      | 19     | 18    | 1       | 18      | 1311.14755                             | -0.00002                                                   |
| 16   | 4      | 12     | 15    | 5       | 11      | 1311.18342                             | 0.00014                                                    |
| 16   | 5      | 12     | 15    | 4       | 11      | 1311.18342                             | 0.00014                                                    |
| 17   | 4      | 14     | 16    | 3       | 13      | 1311.20357                             | -0.00003                                                   |
| 17   | 3      | 14     | 16    | 4       | 13      | 1311.20357                             | -0.00003                                                   |
| 19   | 2      | 18     | 18    | 1       | 17      | 1311.24447                             | 0.00011                                                    |
| 19   | 1      | 18     | 18    | 2       | 17      | 1311.24447                             | 0.00011                                                    |
| 20   | 0      | 20     | 19    | 1       | 19      | 1311.26494                             | 0.00016                                                    |
| 20   | 1      | 20     | 19    | 0       | 19      | 1311.26494                             | 0.00016                                                    |
| 17   | 5      | 13     | 16    | 4       | 12      | 1311.30049                             | 0.00010                                                    |
| 17   | 4      | 13     | 16    | 5       | 12      | 1311.30049                             | 0.00010                                                    |
| 18   | 3      | 15     | 17    | 4       | 14      | 1311.32074                             | 0.00000                                                    |
| 18   | 4      | 15     | 17    | 3       | 14      | 1311.32074                             | 0.00000                                                    |
| 35   | 10     | 25     | 35    | 9       | 26      | 1311.34075                             | -0.00002                                                   |
| 35   | 11     | 25     | 35    | 10      | 26      | 1311.34075                             | -0.00002                                                   |
| 19   | 3      | 17     | 18    | 2       | 16      | 1311.34124                             | 0.00010                                                    |
| 19   | 2      | 17     | 18    | 3       | 16      | 1311.34124                             | 0.00010                                                    |
| 33   | 9      | 25     | 33    | 8       | 26      | 1311.34287                             | 0.00005                                                    |
| 33   | 8      | 25     | 33    | 7       | 26      | 1311.34287                             | 0.00005                                                    |
| 32   | 8      | 25     | 32    | 7       | 26      | 1311.34382                             | 0.00009                                                    |
| 32   | 7      | 25     | 32    | 6       | 26      | 1311.34382                             | 0.00009                                                    |
| 28   | 3      | 25     | 28    | 2       | 26      | 1311.34663                             | -0.00005                                                   |
| 28   | 4      | 25     | 28    | 3       | 26      | 1311.34663                             | -0.00005                                                   |
| 27   | 3      | 25     | 27    | 2       | 26      | 1311.34729                             | 0.00002                                                    |
| 27   | 2      | 25     | 27    | 1       | 26      | 1311.34729                             | 0.00002                                                    |
| 20   | 1      | 19     | 19    | 2       | 18      | 1311.36149                             | -0.00007                                                   |
| 20   | 2      | 19     | 19    | 1       | 18      | 1311.36149                             | -0.00007                                                   |
| 21   | 1      | 21     | 20    | 0       | 20      | 1311.38194                             | -0.00006                                                   |
| 21   | 0      | 21     | 20    | 1       | 20      | 1311.38194                             | -0.00006                                                   |
| 17   | 6      | 12     | 16    | 5       | 11      | 1311.39740                             | 0.00021                                                    |
| 17   | 5      | 12     | 16    | 6       | 11      | 1311.39740                             | 0.00021                                                    |
| 14   | 9      | 5      | 13    | 10      | 4       | 1311.40689                             | 0.00020                                                    |
| 18   | 4      | 14     | 17    | 5       | 13      | 1311.41756                             | 0.00005                                                    |
| 18   | 5      | 14     | 17    | 4       | 13      | 1311.41756                             | 0.00005                                                    |
| 13   | 10     | 4      | 12    | 9       | 3       | 1311.42950                             | 0.00004                                                    |
| 19   | 4      | 16     | 18    | 3       | 15      | 1311.43797                             | 0.00007                                                    |
| 19   | 3      | 16     | 18    | 4       | 15      | 1311.43797                             | 0.00007                                                    |
| 33   | 8      | 26     | 33    | 7       | 27      | 1311.44103                             | -0.00012                                                   |

Continuation, see next page

Continuation of Table 29:  $\nu_{17} \leftarrow gs$  of dithiine.

| $J'$ | $K'_a$ | $K'_c$ | $J''$ | $K''_a$ | $K''_c$ | $\bar{\nu}_{obs}$<br>/cm <sup>-1</sup> | $(\bar{\nu}_{obs} - \bar{\nu}_{cat})$<br>/cm <sup>-1</sup> |
|------|--------|--------|-------|---------|---------|----------------------------------------|------------------------------------------------------------|
| 33   | 7      | 26     | 33    | 6       | 27      | 1311.44103                             | -0.00012                                                   |
| 29   | 4      | 26     | 29    | 3       | 27      | 1311.44397                             | 0.00000                                                    |
| 29   | 3      | 26     | 29    | 2       | 27      | 1311.44397                             | 0.00000                                                    |
| 28   | 2      | 26     | 28    | 1       | 27      | 1311.44456                             | 0.00002                                                    |
| 28   | 3      | 26     | 28    | 2       | 27      | 1311.44456                             | 0.00002                                                    |
| 27   | 1      | 26     | 27    | 0       | 27      | 1311.44503                             | -0.00003                                                   |
| 27   | 2      | 26     | 27    | 1       | 27      | 1311.44503                             | -0.00003                                                   |
| 20   | 2      | 18     | 19    | 3       | 17      | 1311.45845                             | 0.00013                                                    |
| 20   | 3      | 18     | 19    | 2       | 17      | 1311.45845                             | 0.00013                                                    |
| 21   | 2      | 20     | 20    | 1       | 19      | 1311.47860                             | -0.00017                                                   |
| 21   | 1      | 20     | 20    | 2       | 19      | 1311.47860                             | -0.00017                                                   |
| 17   | 7      | 11     | 16    | 6       | 10      | 1311.49400                             | -0.00005                                                   |
| 17   | 6      | 11     | 16    | 7       | 10      | 1311.49400                             | -0.00005                                                   |
| 22   | 0      | 22     | 21    | 1       | 21      | 1311.49913                             | -0.00011                                                   |
| 22   | 1      | 22     | 21    | 0       | 21      | 1311.49913                             | -0.00011                                                   |
| 18   | 5      | 13     | 17    | 6       | 12      | 1311.51424                             | -0.00005                                                   |
| 18   | 6      | 13     | 17    | 5       | 12      | 1311.51424                             | -0.00005                                                   |
| 19   | 5      | 15     | 18    | 4       | 14      | 1311.53449                             | -0.00016                                                   |
| 19   | 4      | 15     | 18    | 5       | 14      | 1311.53449                             | -0.00016                                                   |
| 38   | 11     | 27     | 38    | 10      | 28      | 1311.53503                             | 0.00006                                                    |
| 38   | 12     | 27     | 38    | 11      | 28      | 1311.53503                             | 0.00006                                                    |
| 34   | 7      | 27     | 34    | 6       | 28      | 1311.53873                             | 0.00012                                                    |
| 34   | 8      | 27     | 34    | 7       | 28      | 1311.53873                             | 0.00012                                                    |
| 32   | 5      | 27     | 32    | 4       | 28      | 1311.54016                             | 0.00010                                                    |
| 32   | 6      | 27     | 32    | 5       | 28      | 1311.54016                             | 0.00010                                                    |
| 31   | 4      | 27     | 31    | 3       | 28      | 1311.54061                             | -0.00009                                                   |
| 31   | 5      | 27     | 31    | 4       | 28      | 1311.54061                             | -0.00009                                                   |
| 29   | 2      | 27     | 29    | 1       | 28      | 1311.54179                             | -0.00006                                                   |
| 29   | 3      | 27     | 29    | 2       | 28      | 1311.54179                             | -0.00006                                                   |
| 20   | 3      | 17     | 19    | 4       | 16      | 1311.55541                             | 0.00034                                                    |
| 20   | 4      | 17     | 19    | 3       | 16      | 1311.55541                             | 0.00034                                                    |
| 21   | 3      | 19     | 20    | 2       | 18      | 1311.57545                             | -0.00007                                                   |
| 21   | 2      | 19     | 20    | 3       | 18      | 1311.57545                             | -0.00007                                                   |
| 22   | 1      | 21     | 21    | 2       | 20      | 1311.59616                             | 0.00017                                                    |
| 22   | 2      | 21     | 21    | 1       | 20      | 1311.59616                             | 0.00017                                                    |
| 13   | 11     | 3      | 12    | 10      | 2       | 1311.60488                             | -0.00013                                                   |
| 18   | 6      | 12     | 17    | 7       | 11      | 1311.61131                             | 0.00022                                                    |
| 18   | 7      | 12     | 17    | 6       | 11      | 1311.61131                             | 0.00022                                                    |
| 23   | 1      | 23     | 22    | 0       | 22      | 1311.61640                             | -0.00009                                                   |
| 23   | 0      | 23     | 22    | 1       | 22      | 1311.61640                             | -0.00009                                                   |
| 19   | 6      | 14     | 18    | 5       | 13      | 1311.63162                             | 0.00022                                                    |
| 19   | 5      | 14     | 18    | 6       | 13      | 1311.63162                             | 0.00022                                                    |
| 20   | 4      | 16     | 19    | 5       | 15      | 1311.65195                             | 0.00015                                                    |
| 20   | 5      | 16     | 19    | 4       | 15      | 1311.65195                             | 0.00015                                                    |
| 21   | 4      | 18     | 20    | 3       | 17      | 1311.67242                             | 0.00017                                                    |
| 21   | 3      | 18     | 20    | 4       | 17      | 1311.67242                             | 0.00017                                                    |

Continuation, see next page

Continuation of Table 29:  $\nu_{17} \leftarrow gs$  of dithiine.

| $J'$ | $K'_a$ | $K'_c$ | $J''$ | $K''_a$ | $K''_c$ | $\bar{\nu}_{obs}$<br>/cm <sup>-1</sup> | $(\bar{\nu}_{obs} - \bar{\nu}_{cat})$<br>/cm <sup>-1</sup> |
|------|--------|--------|-------|---------|---------|----------------------------------------|------------------------------------------------------------|
| 22   | 2      | 20     | 21    | 3       | 19      | 1311.69268                             | -0.00005                                                   |
| 22   | 3      | 20     | 21    | 2       | 19      | 1311.69268                             | -0.00005                                                   |
| 18   | 7      | 11     | 17    | 8       | 10      | 1311.70798                             | -0.00001                                                   |
| 18   | 8      | 11     | 17    | 7       | 10      | 1311.70798                             | -0.00001                                                   |
| 23   | 2      | 22     | 22    | 1       | 21      | 1311.71316                             | -0.00008                                                   |
| 23   | 1      | 22     | 22    | 2       | 21      | 1311.71316                             | -0.00008                                                   |
| 19   | 7      | 13     | 18    | 6       | 12      | 1311.72799                             | -0.00018                                                   |
| 19   | 6      | 13     | 18    | 7       | 12      | 1311.72799                             | -0.00018                                                   |
| 24   | 0      | 24     | 23    | 1       | 23      | 1311.73364                             | -0.00013                                                   |
| 24   | 1      | 24     | 23    | 0       | 23      | 1311.73364                             | -0.00013                                                   |
| 20   | 5      | 15     | 19    | 6       | 14      | 1311.74858                             | 0.00005                                                    |
| 20   | 6      | 15     | 19    | 5       | 14      | 1311.74858                             | 0.00005                                                    |
| 21   | 5      | 17     | 20    | 4       | 16      | 1311.76871                             | -0.00026                                                   |
| 21   | 4      | 17     | 20    | 5       | 16      | 1311.76871                             | -0.00026                                                   |
| 22   | 3      | 19     | 21    | 4       | 18      | 1311.78940                             | -0.00005                                                   |
| 22   | 4      | 19     | 21    | 3       | 18      | 1311.78940                             | -0.00005                                                   |
| 18   | 8      | 10     | 17    | 9       | 9       | 1311.80497                             | -0.00013                                                   |
| 18   | 9      | 10     | 17    | 8       | 9       | 1311.80497                             | -0.00013                                                   |
| 23   | 3      | 21     | 22    | 2       | 20      | 1311.81015                             | 0.00019                                                    |
| 23   | 2      | 21     | 22    | 3       | 20      | 1311.81015                             | 0.00019                                                    |
| 19   | 8      | 12     | 18    | 7       | 11      | 1311.82450                             | -0.00049                                                   |
| 19   | 7      | 12     | 18    | 8       | 11      | 1311.82450                             | -0.00049                                                   |
| 24   | 1      | 23     | 23    | 2       | 22      | 1311.83054                             | 0.00004                                                    |
| 24   | 2      | 23     | 23    | 1       | 22      | 1311.83054                             | 0.00004                                                    |
| 20   | 6      | 14     | 19    | 7       | 13      | 1311.84523                             | -0.00004                                                   |
| 20   | 7      | 14     | 19    | 6       | 13      | 1311.84523                             | -0.00004                                                   |
| 25   | 1      | 25     | 24    | 0       | 24      | 1311.85098                             | -0.00009                                                   |
| 25   | 0      | 25     | 24    | 1       | 24      | 1311.85098                             | -0.00009                                                   |
| 21   | 6      | 16     | 20    | 5       | 15      | 1311.86571                             | 0.00003                                                    |
| 21   | 5      | 16     | 20    | 6       | 15      | 1311.86571                             | 0.00003                                                    |
| 22   | 4      | 18     | 21    | 5       | 17      | 1311.88588                             | -0.00027                                                   |
| 22   | 5      | 18     | 21    | 4       | 17      | 1311.88588                             | -0.00027                                                   |
| 23   | 4      | 20     | 22    | 3       | 19      | 1311.90647                             | -0.00020                                                   |
| 23   | 3      | 20     | 22    | 4       | 19      | 1311.90647                             | -0.00020                                                   |
| 24   | 2      | 22     | 23    | 3       | 21      | 1311.92720                             | -0.00001                                                   |
| 24   | 3      | 22     | 23    | 2       | 21      | 1311.92720                             | -0.00001                                                   |
| 25   | 2      | 24     | 24    | 1       | 23      | 1311.94757                             | -0.00021                                                   |
| 25   | 1      | 24     | 24    | 2       | 23      | 1311.94757                             | -0.00021                                                   |
| 21   | 7      | 15     | 20    | 6       | 14      | 1311.96211                             | -0.00028                                                   |
| 21   | 6      | 15     | 20    | 7       | 14      | 1311.96211                             | -0.00028                                                   |
| 26   | 0      | 26     | 25    | 1       | 25      | 1311.96835                             | -0.00004                                                   |
| 26   | 1      | 26     | 25    | 0       | 25      | 1311.96835                             | -0.00004                                                   |
| 22   | 5      | 17     | 21    | 6       | 16      | 1311.98286                             | 0.00001                                                    |
| 22   | 6      | 17     | 21    | 5       | 16      | 1311.98286                             | 0.00001                                                    |
| 23   | 5      | 19     | 22    | 4       | 18      | 1312.00343                             | 0.00007                                                    |
| 23   | 4      | 19     | 22    | 5       | 18      | 1312.00343                             | 0.00007                                                    |

Continuation, see next page

Continuation of Table 29:  $\nu_{17} \leftarrow gs$  of dithiine.

| $J'$ | $K'_a$ | $K'_c$ | $J''$ | $K''_a$ | $K''_c$ | $\tilde{\nu}_{obs}$<br>/cm <sup>-1</sup> | $(\tilde{\nu}_{obs} - \tilde{\nu}_{cat})$<br>/cm <sup>-1</sup> |
|------|--------|--------|-------|---------|---------|------------------------------------------|----------------------------------------------------------------|
| 24   | 3      | 21     | 23    | 4       | 20      | 1312.02383                               | -0.00007                                                       |
| 24   | 4      | 21     | 23    | 3       | 20      | 1312.02383                               | -0.00007                                                       |
| 25   | 3      | 23     | 24    | 2       | 22      | 1312.04453                               | 0.00005                                                        |
| 25   | 2      | 23     | 24    | 3       | 22      | 1312.04453                               | 0.00005                                                        |
| 21   | 8      | 14     | 20    | 7       | 13      | 1312.05909                               | -0.00003                                                       |
| 21   | 7      | 14     | 20    | 8       | 13      | 1312.05909                               | -0.00003                                                       |
| 26   | 1      | 25     | 25    | 2       | 24      | 1312.06500                               | -0.00009                                                       |
| 26   | 2      | 25     | 25    | 1       | 24      | 1312.06500                               | -0.00009                                                       |
| 22   | 6      | 16     | 21    | 7       | 15      | 1312.07964                               | 0.00011                                                        |
| 22   | 7      | 16     | 21    | 6       | 15      | 1312.07964                               | 0.00011                                                        |
| 27   | 1      | 27     | 26    | 0       | 26      | 1312.08582                               | 0.00008                                                        |
| 27   | 0      | 27     | 26    | 1       | 26      | 1312.08582                               | 0.00008                                                        |
| 23   | 6      | 18     | 22    | 5       | 17      | 1312.09996                               | -0.00007                                                       |
| 23   | 5      | 18     | 22    | 6       | 17      | 1312.09996                               | -0.00007                                                       |
| 24   | 4      | 20     | 23    | 5       | 19      | 1312.12063                               | 0.00005                                                        |
| 24   | 5      | 20     | 23    | 4       | 19      | 1312.12063                               | 0.00005                                                        |
| 25   | 4      | 22     | 24    | 3       | 21      | 1312.14104                               | -0.00012                                                       |
| 25   | 3      | 22     | 24    | 4       | 21      | 1312.14104                               | -0.00012                                                       |
| 26   | 2      | 24     | 25    | 3       | 23      | 1312.16164                               | -0.00014                                                       |
| 26   | 3      | 24     | 25    | 2       | 23      | 1312.16164                               | -0.00014                                                       |
| 22   | 7      | 15     | 21    | 8       | 14      | 1312.17623                               | 0.00000                                                        |
| 22   | 8      | 15     | 21    | 7       | 14      | 1312.17623                               | 0.00000                                                        |
| 27   | 2      | 26     | 26    | 1       | 25      | 1312.18233                               | -0.00010                                                       |
| 27   | 1      | 26     | 26    | 2       | 25      | 1312.18233                               | -0.00010                                                       |
| 23   | 7      | 17     | 22    | 6       | 16      | 1312.19669                               | -0.00001                                                       |
| 23   | 6      | 17     | 22    | 7       | 16      | 1312.19669                               | -0.00001                                                       |
| 28   | 0      | 28     | 27    | 1       | 27      | 1312.20305                               | -0.00007                                                       |
| 28   | 1      | 28     | 27    | 0       | 27      | 1312.20305                               | -0.00007                                                       |
| 24   | 5      | 19     | 23    | 6       | 18      | 1312.21717                               | -0.00007                                                       |
| 24   | 6      | 19     | 23    | 5       | 18      | 1312.21717                               | -0.00007                                                       |
| 25   | 5      | 21     | 24    | 4       | 20      | 1312.23765                               | -0.00018                                                       |
| 25   | 4      | 21     | 24    | 5       | 20      | 1312.23765                               | -0.00018                                                       |
| 21   | 10     | 12     | 20    | 9       | 11      | 1312.25294                               | 0.00013                                                        |
| 21   | 9      | 12     | 20    | 10      | 11      | 1312.25294                               | 0.00013                                                        |
| 26   | 3      | 23     | 25    | 4       | 22      | 1312.25836                               | -0.00009                                                       |
| 26   | 4      | 23     | 25    | 3       | 22      | 1312.25836                               | -0.00009                                                       |
| 22   | 8      | 14     | 21    | 9       | 13      | 1312.27273                               | -0.00023                                                       |
| 22   | 9      | 14     | 21    | 8       | 13      | 1312.27273                               | -0.00023                                                       |
| 27   | 3      | 25     | 26    | 2       | 24      | 1312.27909                               | -0.00001                                                       |
| 27   | 2      | 25     | 26    | 3       | 24      | 1312.27909                               | -0.00001                                                       |
| 23   | 8      | 16     | 22    | 7       | 15      | 1312.29352                               | 0.00015                                                        |
| 23   | 7      | 16     | 22    | 8       | 15      | 1312.29352                               | 0.00015                                                        |
| 28   | 1      | 27     | 27    | 2       | 26      | 1312.29980                               | 0.00000                                                        |
| 28   | 2      | 27     | 27    | 1       | 26      | 1312.29980                               | 0.00000                                                        |
| 24   | 6      | 18     | 23    | 7       | 17      | 1312.31404                               | 0.00015                                                        |
| 24   | 7      | 18     | 23    | 6       | 17      | 1312.31404                               | 0.00015                                                        |

Continuation, see next page

Continuation of Table 29:  $\nu_{17} \leftarrow gs$  of dithiine.

| $J'$ | $K'_a$ | $K'_c$ | $J''$ | $K''_a$ | $K''_c$ | $\tilde{\nu}_{obs}$<br>/cm <sup>-1</sup> | $(\tilde{\nu}_{obs} - \tilde{\nu}_{cat})$<br>/cm <sup>-1</sup> |
|------|--------|--------|-------|---------|---------|------------------------------------------|----------------------------------------------------------------|
| 29   | 1      | 29     | 28    | 0       | 28      | 1312.32033                               | -0.00020                                                       |
| 29   | 0      | 29     | 28    | 1       | 28      | 1312.32033                               | -0.00020                                                       |
| 25   | 6      | 20     | 24    | 5       | 19      | 1312.33441                               | -0.00006                                                       |
| 25   | 5      | 20     | 24    | 6       | 19      | 1312.33441                               | -0.00006                                                       |
| 26   | 4      | 22     | 25    | 5       | 21      | 1312.35486                               | -0.00024                                                       |
| 26   | 5      | 22     | 25    | 4       | 21      | 1312.35486                               | -0.00024                                                       |
| 27   | 4      | 24     | 26    | 3       | 23      | 1312.37546                               | -0.00030                                                       |
| 27   | 3      | 24     | 26    | 4       | 23      | 1312.37546                               | -0.00030                                                       |
| 28   | 2      | 26     | 27    | 3       | 25      | 1312.39632                               | -0.00014                                                       |
| 28   | 3      | 26     | 27    | 2       | 25      | 1312.39632                               | -0.00014                                                       |
| 24   | 7      | 17     | 23    | 8       | 16      | 1312.41044                               | -0.00009                                                       |
| 24   | 8      | 17     | 23    | 7       | 16      | 1312.41044                               | -0.00009                                                       |
| 29   | 2      | 28     | 28    | 1       | 27      | 1312.41730                               | 0.00011                                                        |
| 29   | 1      | 28     | 28    | 2       | 27      | 1312.41730                               | 0.00011                                                        |
| 25   | 7      | 19     | 24    | 6       | 18      | 1312.43114                               | 0.00004                                                        |
| 25   | 6      | 19     | 24    | 7       | 18      | 1312.43114                               | 0.00004                                                        |
| 30   | 0      | 30     | 29    | 1       | 29      | 1312.43799                               | 0.00002                                                        |
| 30   | 1      | 30     | 29    | 0       | 29      | 1312.43799                               | 0.00002                                                        |
| 26   | 5      | 21     | 25    | 6       | 20      | 1312.45173                               | 0.00000                                                        |
| 26   | 6      | 21     | 25    | 5       | 20      | 1312.45173                               | 0.00000                                                        |
| 27   | 5      | 23     | 26    | 4       | 22      | 1312.47204                               | -0.00035                                                       |
| 27   | 4      | 23     | 26    | 5       | 22      | 1312.47204                               | -0.00035                                                       |
| 18   | 14     | 5      | 17    | 13      | 4       | 1312.48037                               | -0.00011                                                       |
| 28   | 3      | 25     | 27    | 4       | 24      | 1312.49292                               | -0.00018                                                       |
| 28   | 4      | 25     | 27    | 3       | 24      | 1312.49292                               | -0.00018                                                       |
| 24   | 8      | 16     | 23    | 9       | 15      | 1312.50696                               | -0.00023                                                       |
| 24   | 9      | 16     | 23    | 8       | 15      | 1312.50696                               | -0.00023                                                       |
| 29   | 3      | 27     | 28    | 2       | 26      | 1312.51394                               | 0.00010                                                        |
| 29   | 2      | 27     | 28    | 3       | 26      | 1312.51394                               | 0.00010                                                        |
| 25   | 8      | 18     | 24    | 7       | 17      | 1312.52779                               | 0.00006                                                        |
| 25   | 7      | 18     | 24    | 8       | 17      | 1312.52779                               | 0.00006                                                        |
| 30   | 1      | 29     | 29    | 2       | 28      | 1312.53484                               | 0.00022                                                        |
| 30   | 2      | 29     | 29    | 1       | 28      | 1312.53484                               | 0.00022                                                        |
| 26   | 6      | 20     | 25    | 7       | 19      | 1312.54832                               | -0.00002                                                       |
| 26   | 7      | 20     | 25    | 6       | 19      | 1312.54832                               | -0.00002                                                       |
| 27   | 6      | 22     | 26    | 5       | 21      | 1312.56882                               | -0.00019                                                       |
| 27   | 5      | 22     | 26    | 6       | 21      | 1312.56882                               | -0.00019                                                       |
| 28   | 4      | 24     | 27    | 5       | 23      | 1312.58937                               | -0.00035                                                       |
| 28   | 5      | 24     | 27    | 4       | 23      | 1312.58937                               | -0.00035                                                       |
| 29   | 4      | 26     | 28    | 3       | 25      | 1312.61050                               | 0.00003                                                        |
| 29   | 3      | 26     | 28    | 4       | 25      | 1312.61050                               | 0.00003                                                        |
| 25   | 9      | 17     | 24    | 8       | 16      | 1312.62435                               | 0.00000                                                        |
| 25   | 8      | 17     | 24    | 9       | 16      | 1312.62435                               | 0.00000                                                        |
| 30   | 2      | 28     | 29    | 3       | 27      | 1312.63126                               | 0.00000                                                        |
| 30   | 3      | 28     | 29    | 2       | 27      | 1312.63126                               | 0.00000                                                        |
| 26   | 7      | 19     | 25    | 8       | 18      | 1312.64486                               | -0.00008                                                       |

Continuation, see next page

Continuation of Table 29:  $\nu_{17} \leftarrow gs$  of dithiine.

| $J'$ | $K'_a$ | $K'_c$ | $J''$ | $K''_a$ | $K''_c$ | $\bar{\nu}_{obs}$<br>/cm <sup>-1</sup> | $(\bar{\nu}_{obs} - \bar{\nu}_{cat})$<br>/cm <sup>-1</sup> |
|------|--------|--------|-------|---------|---------|----------------------------------------|------------------------------------------------------------|
| 26   | 8      | 19     | 25    | 7       | 18      | 1312.64486                             | -0.00008                                                   |
| 27   | 7      | 21     | 26    | 6       | 20      | 1312.66571                             | 0.00010                                                    |
| 27   | 6      | 21     | 26    | 7       | 20      | 1312.66571                             | 0.00010                                                    |
| 28   | 5      | 23     | 27    | 6       | 22      | 1312.68614                             | -0.00018                                                   |
| 28   | 6      | 23     | 27    | 5       | 22      | 1312.68614                             | -0.00018                                                   |
| 29   | 5      | 25     | 28    | 4       | 24      | 1312.70706                             | -0.00002                                                   |
| 29   | 4      | 25     | 28    | 5       | 24      | 1312.70706                             | -0.00002                                                   |
| 30   | 3      | 27     | 29    | 4       | 26      | 1312.72777                             | -0.00010                                                   |
| 30   | 4      | 27     | 29    | 3       | 26      | 1312.72777                             | -0.00010                                                   |
| 26   | 8      | 18     | 25    | 9       | 17      | 1312.74112                             | -0.00042                                                   |
| 26   | 9      | 18     | 25    | 8       | 17      | 1312.74112                             | -0.00042                                                   |
| 27   | 8      | 20     | 26    | 7       | 19      | 1312.76196                             | -0.00023                                                   |
| 27   | 7      | 20     | 26    | 8       | 19      | 1312.76196                             | -0.00023                                                   |
| 28   | 6      | 22     | 27    | 7       | 21      | 1312.78286                             | -0.00004                                                   |
| 28   | 7      | 22     | 27    | 6       | 21      | 1312.78286                             | -0.00004                                                   |
| 29   | 6      | 24     | 28    | 5       | 23      | 1312.80354                             | -0.00012                                                   |
| 29   | 5      | 24     | 28    | 6       | 23      | 1312.80354                             | -0.00012                                                   |
| 27   | 9      | 19     | 26    | 8       | 18      | 1312.85863                             | -0.00014                                                   |
| 27   | 8      | 19     | 26    | 9       | 18      | 1312.85863                             | -0.00014                                                   |
| 28   | 7      | 21     | 27    | 8       | 20      | 1312.87941                             | -0.00006                                                   |
| 28   | 8      | 21     | 27    | 7       | 20      | 1312.87941                             | -0.00006                                                   |
| 29   | 7      | 23     | 28    | 6       | 22      | 1312.90009                             | -0.00014                                                   |
| 29   | 6      | 23     | 28    | 7       | 22      | 1312.90009                             | -0.00014                                                   |
| 30   | 5      | 25     | 29    | 6       | 24      | 1312.92105                             | 0.00001                                                    |
| 30   | 6      | 25     | 29    | 5       | 24      | 1312.92105                             | 0.00001                                                    |
| 27   | 10     | 18     | 26    | 9       | 17      | 1312.95518                             | -0.00016                                                   |
| 27   | 9      | 18     | 26    | 10      | 17      | 1312.95518                             | -0.00016                                                   |
| 28   | 8      | 20     | 27    | 9       | 19      | 1312.97608                             | 0.00006                                                    |
| 28   | 9      | 20     | 27    | 8       | 19      | 1312.97608                             | 0.00006                                                    |
| 29   | 8      | 22     | 28    | 7       | 21      | 1312.99677                             | -0.00001                                                   |
| 29   | 7      | 22     | 28    | 8       | 21      | 1312.99677                             | -0.00001                                                   |
| 30   | 6      | 24     | 29    | 7       | 23      | 1313.01756                             | -0.00003                                                   |
| 30   | 7      | 24     | 29    | 6       | 23      | 1313.01756                             | -0.00003                                                   |
| 28   | 9      | 19     | 27    | 10      | 18      | 1313.07265                             | 0.00008                                                    |
| 28   | 10     | 19     | 27    | 9       | 18      | 1313.07265                             | 0.00008                                                    |
| 29   | 9      | 21     | 28    | 8       | 20      | 1313.09343                             | 0.00012                                                    |
| 29   | 8      | 21     | 28    | 9       | 20      | 1313.09343                             | 0.00012                                                    |
| 30   | 7      | 23     | 29    | 8       | 22      | 1313.11408                             | -0.00004                                                   |
| 30   | 8      | 23     | 29    | 7       | 22      | 1313.11408                             | -0.00004                                                   |
| 31   | 7      | 25     | 30    | 6       | 24      | 1313.13502                             | 0.00003                                                    |
| 31   | 6      | 25     | 30    | 7       | 24      | 1313.13502                             | 0.00003                                                    |
| 28   | 10     | 18     | 27    | 11      | 17      | 1313.16917                             | 0.00005                                                    |
| 28   | 11     | 18     | 27    | 10      | 17      | 1313.16917                             | 0.00005                                                    |
| 29   | 10     | 20     | 28    | 9       | 19      | 1313.18998                             | 0.00015                                                    |
| 29   | 9      | 20     | 28    | 10      | 19      | 1313.18998                             | 0.00015                                                    |
| 30   | 8      | 22     | 29    | 9       | 21      | 1313.21048                             | -0.00016                                                   |

Continuation, see next page

Continuation of Table 29:  $\nu_{17} \leftarrow gs$  of dithiine.

| $J'$ | $K'_a$ | $K'_c$ | $J''$ | $K''_a$ | $K''_c$ | $\tilde{\nu}_{obs}$<br>/cm <sup>-1</sup> | $(\tilde{\nu}_{obs} - \tilde{\nu}_{cal})$<br>/cm <sup>-1</sup> |
|------|--------|--------|-------|---------|---------|------------------------------------------|----------------------------------------------------------------|
| 30   | 9      | 22     | 29    | 8       | 21      | 1313.21048                               | -0.00016                                                       |
| 31   | 8      | 24     | 30    | 7       | 23      | 1313.23155                               | 0.00004                                                        |
| 31   | 7      | 24     | 30    | 8       | 23      | 1313.23155                               | 0.00004                                                        |
| 32   | 6      | 26     | 31    | 7       | 25      | 1313.25250                               | 0.00008                                                        |
| 32   | 7      | 26     | 31    | 6       | 25      | 1313.25250                               | 0.00008                                                        |
| 30   | 9      | 21     | 29    | 10      | 20      | 1313.30705                               | -0.00009                                                       |
| 30   | 10     | 21     | 29    | 9       | 20      | 1313.30705                               | -0.00009                                                       |
| 31   | 9      | 23     | 30    | 8       | 22      | 1313.32783                               | -0.00017                                                       |
| 31   | 8      | 23     | 30    | 9       | 22      | 1313.32783                               | -0.00017                                                       |
| 29   | 12     | 18     | 28    | 11      | 17      | 1313.38292                               | 0.00003                                                        |
| 29   | 11     | 18     | 28    | 12      | 17      | 1313.38292                               | 0.00003                                                        |
| 30   | 10     | 20     | 29    | 11      | 19      | 1313.40367                               | 0.00004                                                        |
| 30   | 11     | 20     | 29    | 10      | 19      | 1313.40367                               | 0.00004                                                        |
| 31   | 10     | 22     | 30    | 9       | 21      | 1313.42428                               | -0.00020                                                       |
| 31   | 9      | 22     | 30    | 10      | 21      | 1313.42428                               | -0.00020                                                       |
| 32   | 8      | 24     | 31    | 9       | 23      | 1313.44507                               | -0.00033                                                       |
| 32   | 9      | 24     | 31    | 8       | 23      | 1313.44507                               | -0.00033                                                       |

Table 30: Rovibrational transition wavenumbers  $\tilde{\nu}_{obs}$  for the fundamental  $\nu_3 \leftarrow gs$  of dithiine.

$J''$ ,  $K''_a$  and  $K''_c$  are lower state quantum numbers,  $J'$ ,  $K'_a$  and  $K'_c$  are upper state quantum numbers,  $\tilde{\nu}_{obs.}$  = observed wavenumber,  $\tilde{\nu}_{cal.}$  = wavenumber calculated with the parameters in Table 10. All wavenumbers are given in cm<sup>-1</sup>.

Table 30: Rovibrational transitions of  $\nu_3 \leftarrow gs$  of dithiine.

| $J'$ | $K'_a$ | $K'_c$ | $J''$ | $K''_a$ | $K''_c$ | $\tilde{\nu}_{obs}$<br>/cm <sup>-1</sup> | $(\tilde{\nu}_{obs} - \tilde{\nu}_{cal})$<br>/cm <sup>-1</sup> |
|------|--------|--------|-------|---------|---------|------------------------------------------|----------------------------------------------------------------|
| 38   | 2      | 36     | 39    | 2       | 37      | 1539.97354                               | 0.00060                                                        |
| 38   | 3      | 36     | 39    | 3       | 37      | 1539.97354                               | 0.00060                                                        |
| 37   | 3      | 34     | 38    | 3       | 35      | 1539.99497                               | 0.00000                                                        |
| 37   | 4      | 34     | 38    | 4       | 35      | 1539.99497                               | 0.00000                                                        |
| 36   | 4      | 32     | 37    | 4       | 33      | 1540.01757                               | 0.00042                                                        |
| 36   | 5      | 32     | 37    | 5       | 33      | 1540.01757                               | 0.00042                                                        |
| 35   | 5      | 30     | 36    | 5       | 31      | 1540.03961                               | 0.00015                                                        |
| 35   | 6      | 30     | 36    | 6       | 31      | 1540.03961                               | 0.00015                                                        |
| 39   | 1      | 39     | 40    | 1       | 40      | 1540.05259                               | 0.00047                                                        |
| 39   | 0      | 39     | 40    | 0       | 40      | 1540.05259                               | 0.00047                                                        |
| 34   | 7      | 28     | 35    | 7       | 29      | 1540.06159                               | -0.00030                                                       |
| 34   | 6      | 28     | 35    | 6       | 29      | 1540.06159                               | -0.00030                                                       |
| 37   | 3      | 35     | 38    | 3       | 36      | 1540.09592                               | 0.00028                                                        |

Continuation, see next page

Continuation of Table 30:  $\nu_3 \leftarrow gs$  of dithiine.

| $J'$ | $K'_a$ | $K'_c$ | $J''$ | $K''_a$ | $K''_c$ | $\tilde{\nu}_{obs}$<br>/cm <sup>-1</sup> | $(\tilde{\nu}_{obs} - \tilde{\nu}_{cat})$<br>/cm <sup>-1</sup> |
|------|--------|--------|-------|---------|---------|------------------------------------------|----------------------------------------------------------------|
| 37   | 2      | 35     | 38    | 2       | 36      | 1540.09592                               | 0.00028                                                        |
| 32   | 9      | 24     | 33    | 9       | 25      | 1540.10734                               | 0.00030                                                        |
| 32   | 8      | 24     | 33    | 8       | 25      | 1540.10734                               | 0.00030                                                        |
| 36   | 3      | 33     | 37    | 3       | 34      | 1540.11809                               | 0.00046                                                        |
| 36   | 4      | 33     | 37    | 4       | 34      | 1540.11809                               | 0.00046                                                        |
| 31   | 10     | 22     | 32    | 10      | 23      | 1540.12978                               | 0.00010                                                        |
| 31   | 9      | 22     | 32    | 9       | 23      | 1540.12978                               | 0.00010                                                        |
| 35   | 4      | 31     | 36    | 4       | 32      | 1540.14014                               | 0.00037                                                        |
| 35   | 5      | 31     | 36    | 5       | 32      | 1540.14014                               | 0.00037                                                        |
| 30   | 11     | 20     | 31    | 11      | 21      | 1540.15194                               | -0.00034                                                       |
| 30   | 10     | 20     | 31    | 10      | 21      | 1540.15194                               | -0.00034                                                       |
| 34   | 6      | 29     | 35    | 6       | 30      | 1540.16200                               | -0.00005                                                       |
| 34   | 5      | 29     | 35    | 5       | 30      | 1540.16200                               | -0.00005                                                       |
| 38   | 1      | 38     | 39    | 1       | 39      | 1540.17489                               | 0.00014                                                        |
| 38   | 0      | 38     | 39    | 0       | 39      | 1540.17489                               | 0.00014                                                        |
| 29   | 11     | 18     | 30    | 11      | 19      | 1540.17489                               | 0.00014                                                        |
| 29   | 12     | 18     | 30    | 12      | 19      | 1540.17489                               | 0.00014                                                        |
| 33   | 6      | 27     | 34    | 6       | 28      | 1540.18433                               | -0.00012                                                       |
| 33   | 7      | 27     | 34    | 7       | 28      | 1540.18433                               | -0.00012                                                       |
| 37   | 1      | 36     | 38    | 1       | 37      | 1540.19706                               | 0.00066                                                        |
| 37   | 2      | 36     | 38    | 2       | 37      | 1540.19706                               | 0.00066                                                        |
| 28   | 12     | 16     | 29    | 12      | 17      | 1540.19706                               | 0.00017                                                        |
| 28   | 13     | 16     | 29    | 13      | 17      | 1540.19706                               | 0.00017                                                        |
| 32   | 7      | 25     | 33    | 7       | 26      | 1540.20710                               | 0.00016                                                        |
| 32   | 8      | 25     | 33    | 8       | 26      | 1540.20710                               | 0.00016                                                        |
| 35   | 4      | 32     | 36    | 4       | 33      | 1540.24026                               | 0.00009                                                        |
| 35   | 3      | 32     | 36    | 3       | 33      | 1540.24026                               | 0.00009                                                        |
| 30   | 10     | 21     | 31    | 10      | 22      | 1540.25139                               | -0.00069                                                       |
| 30   | 9      | 21     | 31    | 9       | 22      | 1540.25139                               | -0.00069                                                       |
| 34   | 4      | 30     | 35    | 4       | 31      | 1540.26190                               | -0.00038                                                       |
| 34   | 5      | 30     | 35    | 5       | 31      | 1540.26190                               | -0.00038                                                       |
| 29   | 10     | 19     | 30    | 10      | 20      | 1540.27461                               | 0.00001                                                        |
| 29   | 11     | 19     | 30    | 11      | 20      | 1540.27461                               | 0.00001                                                        |
| 33   | 5      | 28     | 34    | 5       | 29      | 1540.28475                               | 0.00023                                                        |
| 33   | 6      | 28     | 34    | 6       | 29      | 1540.28475                               | 0.00023                                                        |
| 36   | 2      | 35     | 37    | 2       | 36      | 1540.31898                               | 0.00011                                                        |
| 36   | 1      | 35     | 37    | 1       | 36      | 1540.31898                               | 0.00011                                                        |
| 27   | 12     | 15     | 28    | 12      | 16      | 1540.31898                               | 0.00011                                                        |
| 27   | 13     | 15     | 28    | 13      | 16      | 1540.31898                               | 0.00011                                                        |
| 31   | 8      | 24     | 32    | 8       | 25      | 1540.32893                               | -0.00039                                                       |
| 31   | 7      | 24     | 32    | 7       | 25      | 1540.32893                               | -0.00039                                                       |
| 30   | 8      | 22     | 31    | 8       | 23      | 1540.35172                               | -0.00011                                                       |
| 30   | 9      | 22     | 31    | 9       | 23      | 1540.35172                               | -0.00011                                                       |
| 34   | 4      | 31     | 35    | 4       | 32      | 1540.36307                               | 0.00049                                                        |
| 34   | 3      | 31     | 35    | 3       | 32      | 1540.36307                               | 0.00049                                                        |
| 29   | 9      | 20     | 30    | 9       | 21      | 1540.37409                               | -0.00025                                                       |

Continuation, see next page

Continuation of Table 30:  $\nu_3 \leftarrow gs$  of dithiine.

| $J'$ | $K'_a$ | $K'_c$ | $J''$ | $K''_a$ | $K''_c$ | $\tilde{\nu}_{obs}$<br>/cm <sup>-1</sup> | $(\tilde{\nu}_{obs} - \tilde{\nu}_{cat})$<br>/cm <sup>-1</sup> |
|------|--------|--------|-------|---------|---------|------------------------------------------|----------------------------------------------------------------|
| 29   | 10     | 20     | 30    | 10      | 21      | 1540.37409                               | -0.00025                                                       |
| 33   | 5      | 29     | 34    | 5       | 30      | 1540.38464                               | -0.00001                                                       |
| 33   | 4      | 29     | 34    | 4       | 30      | 1540.38464                               | -0.00001                                                       |
| 28   | 11     | 18     | 29    | 11      | 19      | 1540.39680                               | 0.00002                                                        |
| 28   | 10     | 18     | 29    | 10      | 19      | 1540.39680                               | 0.00002                                                        |
| 32   | 5      | 27     | 33    | 5       | 28      | 1540.40682                               | -0.00004                                                       |
| 32   | 6      | 27     | 33    | 6       | 28      | 1540.40682                               | -0.00004                                                       |
| 27   | 11     | 16     | 28    | 11      | 17      | 1540.41894                               | -0.00003                                                       |
| 27   | 12     | 16     | 28    | 12      | 17      | 1540.41894                               | -0.00003                                                       |
| 36   | 0      | 36     | 37    | 0       | 37      | 1540.41966                               | 0.00001                                                        |
| 36   | 1      | 36     | 37    | 1       | 37      | 1540.41966                               | 0.00001                                                        |
| 31   | 6      | 25     | 32    | 6       | 26      | 1540.42930                               | 0.00013                                                        |
| 31   | 7      | 25     | 32    | 7       | 26      | 1540.42930                               | 0.00013                                                        |
| 26   | 13     | 14     | 27    | 13      | 15      | 1540.44060                               | -0.00003                                                       |
| 26   | 12     | 14     | 27    | 12      | 15      | 1540.44060                               | -0.00003                                                       |
| 34   | 2      | 32     | 35    | 2       | 33      | 1540.46334                               | 0.00037                                                        |
| 34   | 3      | 32     | 35    | 3       | 33      | 1540.46334                               | 0.00037                                                        |
| 33   | 4      | 30     | 34    | 4       | 31      | 1540.48495                               | 0.00009                                                        |
| 33   | 3      | 30     | 34    | 3       | 31      | 1540.48495                               | 0.00009                                                        |
| 28   | 10     | 19     | 29    | 10      | 20      | 1540.49663                               | 0.00015                                                        |
| 28   | 9      | 19     | 29    | 9       | 20      | 1540.49663                               | 0.00015                                                        |
| 32   | 4      | 28     | 33    | 4       | 29      | 1540.50704                               | 0.00014                                                        |
| 32   | 5      | 28     | 33    | 5       | 29      | 1540.50704                               | 0.00014                                                        |
| 27   | 10     | 17     | 28    | 10      | 18      | 1540.51913                               | 0.00033                                                        |
| 27   | 11     | 17     | 28    | 11      | 18      | 1540.51913                               | 0.00033                                                        |
| 31   | 5      | 26     | 32    | 5       | 27      | 1540.52890                               | -0.00017                                                       |
| 31   | 6      | 26     | 32    | 6       | 27      | 1540.52890                               | -0.00017                                                       |
| 35   | 1      | 35     | 36    | 1       | 36      | 1540.54170                               | -0.00020                                                       |
| 35   | 0      | 35     | 36    | 0       | 36      | 1540.54170                               | -0.00020                                                       |
| 30   | 6      | 24     | 31    | 6       | 25      | 1540.55124                               | -0.00010                                                       |
| 30   | 7      | 24     | 31    | 7       | 25      | 1540.55124                               | -0.00010                                                       |
| 34   | 1      | 33     | 35    | 1       | 34      | 1540.56395                               | 0.00050                                                        |
| 34   | 2      | 33     | 35    | 2       | 34      | 1540.56395                               | 0.00050                                                        |
| 29   | 7      | 22     | 30    | 7       | 23      | 1540.57384                               | 0.00014                                                        |
| 29   | 8      | 22     | 30    | 8       | 23      | 1540.57384                               | 0.00014                                                        |
| 33   | 3      | 31     | 34    | 3       | 32      | 1540.58536                               | 0.00020                                                        |
| 33   | 2      | 31     | 34    | 2       | 32      | 1540.58536                               | 0.00020                                                        |
| 28   | 9      | 20     | 29    | 9       | 21      | 1540.59644                               | 0.00034                                                        |
| 28   | 8      | 20     | 29    | 8       | 21      | 1540.59644                               | 0.00034                                                        |
| 32   | 4      | 29     | 33    | 4       | 30      | 1540.60694                               | -0.00008                                                       |
| 32   | 3      | 29     | 33    | 3       | 30      | 1540.60694                               | -0.00008                                                       |
| 27   | 9      | 18     | 28    | 9       | 19      | 1540.61842                               | -0.00005                                                       |
| 27   | 10     | 18     | 28    | 10      | 19      | 1540.61842                               | -0.00005                                                       |
| 31   | 4      | 27     | 32    | 4       | 28      | 1540.62923                               | 0.00021                                                        |
| 31   | 5      | 27     | 32    | 5       | 28      | 1540.62923                               | 0.00021                                                        |
| 26   | 11     | 16     | 27    | 11      | 17      | 1540.64069                               | 0.00001                                                        |

Continuation, see next page

Continuation of Table 30:  $\nu_3 \leftarrow gs$  of dithiine.

| $J'$ | $K'_a$ | $K'_c$ | $J''$ | $K''_a$ | $K''_c$ | $\tilde{\nu}_{obs}$<br>/cm <sup>-1</sup> | $(\tilde{\nu}_{obs} - \tilde{\nu}_{cat})$<br>/cm <sup>-1</sup> |
|------|--------|--------|-------|---------|---------|------------------------------------------|----------------------------------------------------------------|
| 26   | 10     | 16     | 27    | 10      | 17      | 1540.64069                               | 0.00001                                                        |
| 30   | 5      | 25     | 31    | 5       | 26      | 1540.65152                               | 0.00037                                                        |
| 30   | 6      | 25     | 31    | 6       | 26      | 1540.65152                               | 0.00037                                                        |
| 25   | 11     | 14     | 26    | 11      | 15      | 1540.66259                               | 0.00010                                                        |
| 25   | 12     | 14     | 26    | 12      | 15      | 1540.66259                               | 0.00010                                                        |
| 34   | 1      | 34     | 35    | 1       | 35      | 1540.66345                               | -0.00058                                                       |
| 34   | 0      | 34     | 35    | 0       | 35      | 1540.66345                               | -0.00058                                                       |
| 29   | 6      | 23     | 30    | 6       | 24      | 1540.67381                               | 0.00042                                                        |
| 29   | 7      | 23     | 30    | 7       | 24      | 1540.67381                               | 0.00042                                                        |
| 33   | 1      | 32     | 34    | 1       | 33      | 1540.68566                               | 0.00011                                                        |
| 33   | 2      | 32     | 34    | 2       | 33      | 1540.68566                               | 0.00011                                                        |
| 28   | 7      | 21     | 29    | 7       | 22      | 1540.69554                               | -0.00016                                                       |
| 28   | 8      | 21     | 29    | 8       | 22      | 1540.69554                               | -0.00016                                                       |
| 32   | 3      | 30     | 33    | 3       | 31      | 1540.70755                               | 0.00033                                                        |
| 32   | 2      | 30     | 33    | 2       | 31      | 1540.70755                               | 0.00033                                                        |
| 27   | 8      | 19     | 28    | 8       | 20      | 1540.71806                               | 0.00002                                                        |
| 27   | 9      | 19     | 28    | 9       | 20      | 1540.71806                               | 0.00002                                                        |
| 31   | 4      | 28     | 32    | 4       | 29      | 1540.72891                               | -0.00014                                                       |
| 31   | 3      | 28     | 32    | 3       | 29      | 1540.72891                               | -0.00014                                                       |
| 26   | 10     | 17     | 27    | 10      | 18      | 1540.74023                               | -0.00008                                                       |
| 26   | 9      | 17     | 27    | 9       | 18      | 1540.74023                               | -0.00008                                                       |
| 30   | 4      | 26     | 31    | 4       | 27      | 1540.75119                               | 0.00017                                                        |
| 30   | 5      | 26     | 31    | 5       | 27      | 1540.75119                               | 0.00017                                                        |
| 29   | 6      | 24     | 30    | 6       | 25      | 1540.77320                               | 0.00009                                                        |
| 29   | 5      | 24     | 30    | 5       | 25      | 1540.77320                               | 0.00009                                                        |
| 33   | 1      | 33     | 34    | 1       | 34      | 1540.78588                               | -0.00015                                                       |
| 33   | 0      | 33     | 34    | 0       | 34      | 1540.78588                               | -0.00015                                                       |
| 28   | 7      | 22     | 29    | 7       | 23      | 1540.79505                               | -0.00025                                                       |
| 28   | 6      | 22     | 29    | 6       | 23      | 1540.79505                               | -0.00025                                                       |
| 32   | 1      | 31     | 33    | 1       | 32      | 1540.80760                               | 0.00009                                                        |
| 32   | 2      | 31     | 33    | 2       | 32      | 1540.80760                               | 0.00009                                                        |
| 27   | 8      | 20     | 28    | 8       | 21      | 1540.81722                               | -0.00034                                                       |
| 27   | 7      | 20     | 28    | 7       | 21      | 1540.81722                               | -0.00034                                                       |
| 31   | 3      | 29     | 32    | 3       | 30      | 1540.82936                               | 0.00020                                                        |
| 31   | 2      | 29     | 32    | 2       | 30      | 1540.82936                               | 0.00020                                                        |
| 26   | 9      | 18     | 27    | 9       | 19      | 1540.83975                               | -0.00008                                                       |
| 26   | 8      | 18     | 27    | 8       | 19      | 1540.83975                               | -0.00008                                                       |
| 30   | 4      | 27     | 31    | 4       | 28      | 1540.85086                               | -0.00009                                                       |
| 30   | 3      | 27     | 31    | 3       | 28      | 1540.85086                               | -0.00009                                                       |
| 25   | 9      | 16     | 26    | 9       | 17      | 1540.86265                               | 0.00064                                                        |
| 25   | 10     | 16     | 26    | 10      | 17      | 1540.86265                               | 0.00064                                                        |
| 29   | 4      | 25     | 30    | 4       | 26      | 1540.87288                               | 0.00000                                                        |
| 29   | 5      | 25     | 30    | 5       | 26      | 1540.87288                               | 0.00000                                                        |
| 28   | 5      | 23     | 29    | 5       | 24      | 1540.89510                               | 0.00017                                                        |
| 28   | 6      | 23     | 29    | 6       | 24      | 1540.89510                               | 0.00017                                                        |
| 32   | 0      | 32     | 33    | 0       | 33      | 1540.90767                               | -0.00023                                                       |

Continuation, see next page

Continuation of Table 30:  $\nu_3 \leftarrow gs$  of dithiine.

| $J'$ | $K'_a$ | $K'_c$ | $J''$ | $K''_a$ | $K''_c$ | $\tilde{\nu}_{obs}$<br>/cm <sup>-1</sup> | $(\tilde{\nu}_{obs} - \tilde{\nu}_{cat})$<br>/cm <sup>-1</sup> |
|------|--------|--------|-------|---------|---------|------------------------------------------|----------------------------------------------------------------|
| 32   | 1      | 32     | 33    | 1       | 33      | 1540.90767                               | -0.00023                                                       |
| 31   | 1      | 30     | 32    | 1       | 31      | 1540.92926                               | -0.00009                                                       |
| 31   | 2      | 30     | 32    | 2       | 31      | 1540.92926                               | -0.00009                                                       |
| 26   | 7      | 19     | 27    | 7       | 20      | 1540.93919                               | -0.00010                                                       |
| 26   | 8      | 19     | 27    | 8       | 20      | 1540.93919                               | -0.00010                                                       |
| 30   | 2      | 28     | 31    | 2       | 29      | 1540.95093                               | -0.00003                                                       |
| 30   | 3      | 28     | 31    | 3       | 29      | 1540.95093                               | -0.00003                                                       |
| 25   | 8      | 17     | 26    | 8       | 18      | 1540.96184                               | 0.00035                                                        |
| 25   | 9      | 17     | 26    | 9       | 18      | 1540.96184                               | 0.00035                                                        |
| 29   | 4      | 26     | 30    | 4       | 27      | 1540.97264                               | -0.00008                                                       |
| 29   | 3      | 26     | 30    | 3       | 27      | 1540.97264                               | -0.00008                                                       |
| 28   | 4      | 24     | 29    | 4       | 25      | 1540.99490                               | 0.00029                                                        |
| 28   | 5      | 24     | 29    | 5       | 25      | 1540.99490                               | 0.00029                                                        |
| 27   | 5      | 22     | 28    | 5       | 23      | 1541.01657                               | -0.00005                                                       |
| 27   | 6      | 22     | 28    | 6       | 23      | 1541.01657                               | -0.00005                                                       |
| 31   | 0      | 31     | 32    | 0       | 32      | 1541.03006                               | 0.00042                                                        |
| 31   | 1      | 31     | 32    | 1       | 32      | 1541.03006                               | 0.00042                                                        |
| 26   | 7      | 20     | 27    | 7       | 21      | 1541.03853                               | -0.00020                                                       |
| 26   | 6      | 20     | 27    | 6       | 21      | 1541.03853                               | -0.00020                                                       |
| 30   | 2      | 29     | 31    | 2       | 30      | 1541.05130                               | 0.00024                                                        |
| 30   | 1      | 29     | 31    | 1       | 30      | 1541.05130                               | 0.00024                                                        |
| 25   | 7      | 18     | 26    | 7       | 19      | 1541.06090                               | 0.00002                                                        |
| 25   | 8      | 18     | 26    | 8       | 19      | 1541.06090                               | 0.00002                                                        |
| 29   | 2      | 27     | 30    | 2       | 28      | 1541.07267                               | 0.00004                                                        |
| 29   | 3      | 27     | 30    | 3       | 28      | 1541.07267                               | 0.00004                                                        |
| 24   | 9      | 16     | 25    | 9       | 17      | 1541.08332                               | 0.00032                                                        |
| 24   | 8      | 16     | 25    | 8       | 17      | 1541.08332                               | 0.00032                                                        |
| 28   | 4      | 25     | 29    | 4       | 26      | 1541.09430                               | -0.00005                                                       |
| 28   | 3      | 25     | 29    | 3       | 26      | 1541.09430                               | -0.00005                                                       |
| 27   | 5      | 23     | 28    | 5       | 24      | 1541.11645                               | 0.00024                                                        |
| 27   | 4      | 23     | 28    | 4       | 24      | 1541.11645                               | 0.00024                                                        |
| 26   | 6      | 21     | 27    | 6       | 22      | 1541.13795                               | -0.00023                                                       |
| 26   | 5      | 21     | 27    | 5       | 22      | 1541.13795                               | -0.00023                                                       |
| 30   | 0      | 30     | 31    | 0       | 31      | 1541.15107                               | -0.00018                                                       |
| 30   | 1      | 30     | 31    | 1       | 31      | 1541.15107                               | -0.00018                                                       |
| 25   | 6      | 19     | 26    | 6       | 20      | 1541.16044                               | 0.00020                                                        |
| 25   | 7      | 19     | 26    | 7       | 20      | 1541.16044                               | 0.00020                                                        |
| 29   | 2      | 28     | 30    | 2       | 29      | 1541.17247                               | -0.00016                                                       |
| 29   | 1      | 28     | 30    | 1       | 29      | 1541.17247                               | -0.00016                                                       |
| 24   | 7      | 17     | 25    | 7       | 18      | 1541.18231                               | -0.00002                                                       |
| 24   | 8      | 17     | 25    | 8       | 18      | 1541.18231                               | -0.00002                                                       |
| 28   | 3      | 26     | 29    | 3       | 27      | 1541.19417                               | 0.00000                                                        |
| 28   | 2      | 26     | 29    | 2       | 27      | 1541.19417                               | 0.00000                                                        |
| 23   | 9      | 15     | 24    | 9       | 16      | 1541.20442                               | 0.00006                                                        |
| 23   | 8      | 15     | 24    | 8       | 16      | 1541.20442                               | 0.00006                                                        |
| 27   | 4      | 24     | 28    | 4       | 25      | 1541.21600                               | 0.00014                                                        |

Continuation, see next page

Continuation of Table 30:  $\nu_3 \leftarrow gs$  of dithiine.

| $J'$ | $K'_a$ | $K'_c$ | $J''$ | $K''_a$ | $K''_c$ | $\tilde{\nu}_{obs}$<br>/cm <sup>-1</sup> | $(\tilde{\nu}_{obs} - \tilde{\nu}_{cat})$<br>/cm <sup>-1</sup> |
|------|--------|--------|-------|---------|---------|------------------------------------------|----------------------------------------------------------------|
| 27   | 3      | 24     | 28    | 3       | 25      | 1541.21600                               | 0.00014                                                        |
| 26   | 4      | 22     | 27    | 4       | 23      | 1541.23795                               | 0.00027                                                        |
| 26   | 5      | 22     | 27    | 5       | 23      | 1541.23795                               | 0.00027                                                        |
| 25   | 5      | 20     | 26    | 5       | 21      | 1541.25995                               | 0.00034                                                        |
| 25   | 6      | 20     | 26    | 6       | 21      | 1541.25995                               | 0.00034                                                        |
| 29   | 0      | 29     | 30    | 0       | 30      | 1541.27324                               | 0.00051                                                        |
| 29   | 1      | 29     | 30    | 1       | 30      | 1541.27324                               | 0.00051                                                        |
| 24   | 7      | 18     | 25    | 7       | 19      | 1541.28133                               | -0.00029                                                       |
| 24   | 6      | 18     | 25    | 6       | 19      | 1541.28133                               | -0.00029                                                       |
| 28   | 2      | 27     | 29    | 2       | 28      | 1541.29393                               | -0.00014                                                       |
| 28   | 1      | 27     | 29    | 1       | 28      | 1541.29393                               | -0.00014                                                       |
| 23   | 8      | 16     | 24    | 8       | 17      | 1541.30363                               | -0.00001                                                       |
| 23   | 7      | 16     | 24    | 7       | 17      | 1541.30363                               | -0.00001                                                       |
| 27   | 2      | 25     | 28    | 2       | 26      | 1541.31561                               | 0.00003                                                        |
| 27   | 3      | 25     | 28    | 3       | 26      | 1541.31561                               | 0.00003                                                        |
| 22   | 9      | 14     | 23    | 9       | 15      | 1541.32526                               | -0.00030                                                       |
| 22   | 8      | 14     | 23    | 8       | 15      | 1541.32526                               | -0.00030                                                       |
| 26   | 3      | 23     | 27    | 3       | 24      | 1541.33762                               | 0.00039                                                        |
| 26   | 4      | 23     | 27    | 4       | 24      | 1541.33762                               | 0.00039                                                        |
| 25   | 4      | 21     | 26    | 4       | 22      | 1541.35890                               | -0.00011                                                       |
| 25   | 5      | 21     | 26    | 5       | 22      | 1541.35890                               | -0.00011                                                       |
| 24   | 5      | 19     | 25    | 5       | 20      | 1541.38056                               | -0.00034                                                       |
| 24   | 6      | 19     | 25    | 6       | 20      | 1541.38056                               | -0.00034                                                       |
| 28   | 0      | 28     | 29    | 0       | 29      | 1541.39397                               | -0.00010                                                       |
| 28   | 1      | 28     | 29    | 1       | 29      | 1541.39397                               | -0.00010                                                       |
| 23   | 6      | 17     | 24    | 6       | 18      | 1541.40307                               | 0.00021                                                        |
| 23   | 7      | 17     | 24    | 7       | 18      | 1541.40307                               | 0.00021                                                        |
| 22   | 8      | 15     | 23    | 8       | 16      | 1541.42516                               | 0.00036                                                        |
| 22   | 7      | 15     | 23    | 7       | 16      | 1541.42516                               | 0.00036                                                        |
| 26   | 2      | 24     | 27    | 2       | 25      | 1541.43699                               | 0.00014                                                        |
| 26   | 3      | 24     | 27    | 3       | 25      | 1541.43699                               | 0.00014                                                        |
| 21   | 8      | 13     | 22    | 8       | 14      | 1541.44673                               | 0.00013                                                        |
| 21   | 9      | 13     | 22    | 9       | 14      | 1541.44673                               | 0.00013                                                        |
| 25   | 3      | 22     | 26    | 3       | 23      | 1541.45854                               | 0.00007                                                        |
| 25   | 4      | 22     | 26    | 4       | 23      | 1541.45854                               | 0.00007                                                        |
| 24   | 4      | 20     | 25    | 4       | 21      | 1541.48046                               | 0.00025                                                        |
| 24   | 5      | 20     | 25    | 5       | 21      | 1541.48046                               | 0.00025                                                        |
| 23   | 5      | 18     | 24    | 5       | 19      | 1541.50195                               | -0.00011                                                       |
| 23   | 6      | 18     | 24    | 6       | 19      | 1541.50195                               | -0.00011                                                       |
| 27   | 0      | 27     | 28    | 0       | 28      | 1541.51518                               | -0.00010                                                       |
| 27   | 1      | 27     | 28    | 1       | 28      | 1541.51518                               | -0.00010                                                       |
| 22   | 7      | 16     | 23    | 7       | 17      | 1541.52416                               | 0.00021                                                        |
| 22   | 6      | 16     | 23    | 6       | 17      | 1541.52416                               | 0.00021                                                        |
| 26   | 2      | 25     | 27    | 2       | 26      | 1541.53651                               | -0.00005                                                       |
| 26   | 1      | 25     | 27    | 1       | 26      | 1541.53651                               | -0.00005                                                       |
| 21   | 8      | 14     | 22    | 8       | 15      | 1541.54630                               | 0.00048                                                        |

Continuation, see next page

Continuation of Table 30:  $\nu_3 \leftarrow gs$  of dithiine.

| $J'$ | $K'_a$ | $K'_c$ | $J''$ | $K''_a$ | $K''_c$ | $\tilde{\nu}_{obs}$<br>/cm <sup>-1</sup> | $(\tilde{\nu}_{obs} - \tilde{\nu}_{cat})$<br>/cm <sup>-1</sup> |
|------|--------|--------|-------|---------|---------|------------------------------------------|----------------------------------------------------------------|
| 21   | 7      | 14     | 22    | 7       | 15      | 1541.54630                               | 0.00048                                                        |
| 25   | 3      | 23     | 26    | 3       | 24      | 1541.55842                               | 0.00043                                                        |
| 25   | 2      | 23     | 26    | 2       | 24      | 1541.55842                               | 0.00043                                                        |
| 24   | 3      | 21     | 25    | 3       | 22      | 1541.57925                               | -0.00032                                                       |
| 24   | 4      | 21     | 25    | 4       | 22      | 1541.57925                               | -0.00032                                                       |
| 23   | 4      | 19     | 24    | 4       | 20      | 1541.60083                               | -0.00044                                                       |
| 23   | 5      | 19     | 24    | 5       | 20      | 1541.60083                               | -0.00044                                                       |
| 22   | 6      | 17     | 23    | 6       | 18      | 1541.62282                               | -0.00025                                                       |
| 22   | 5      | 17     | 23    | 5       | 18      | 1541.62282                               | -0.00025                                                       |
| 26   | 0      | 26     | 27    | 0       | 27      | 1541.63636                               | 0.00001                                                        |
| 26   | 1      | 26     | 27    | 1       | 27      | 1541.63636                               | 0.00001                                                        |
| 21   | 7      | 15     | 22    | 7       | 16      | 1541.64509                               | 0.00018                                                        |
| 21   | 6      | 15     | 22    | 6       | 16      | 1541.64509                               | 0.00018                                                        |
| 25   | 1      | 24     | 26    | 1       | 25      | 1541.65759                               | 0.00000                                                        |
| 25   | 2      | 24     | 26    | 2       | 25      | 1541.65759                               | 0.00000                                                        |
| 20   | 7      | 13     | 21    | 7       | 14      | 1541.66696                               | 0.00028                                                        |
| 20   | 8      | 13     | 21    | 8       | 14      | 1541.66696                               | 0.00028                                                        |
| 24   | 3      | 22     | 25    | 3       | 23      | 1541.67885                               | -0.00014                                                       |
| 24   | 2      | 22     | 25    | 2       | 23      | 1541.67885                               | -0.00014                                                       |
| 19   | 8      | 11     | 20    | 8       | 12      | 1541.68779                               | -0.00034                                                       |
| 19   | 9      | 11     | 20    | 9       | 12      | 1541.68779                               | -0.00034                                                       |
| 23   | 3      | 20     | 24    | 3       | 21      | 1541.70076                               | 0.00022                                                        |
| 23   | 4      | 20     | 24    | 4       | 21      | 1541.70076                               | 0.00022                                                        |
| 22   | 4      | 18     | 23    | 4       | 19      | 1541.72208                               | -0.00012                                                       |
| 22   | 5      | 18     | 23    | 5       | 19      | 1541.72208                               | -0.00012                                                       |
| 21   | 5      | 16     | 22    | 5       | 17      | 1541.74358                               | -0.00037                                                       |
| 21   | 6      | 16     | 22    | 6       | 17      | 1541.74358                               | -0.00037                                                       |
| 25   | 0      | 25     | 26    | 0       | 26      | 1541.75705                               | -0.00024                                                       |
| 25   | 1      | 25     | 26    | 1       | 26      | 1541.75705                               | -0.00024                                                       |
| 20   | 7      | 14     | 21    | 7       | 15      | 1541.76562                               | -0.00010                                                       |
| 20   | 6      | 14     | 21    | 6       | 15      | 1541.76562                               | -0.00010                                                       |
| 24   | 1      | 23     | 25    | 1       | 24      | 1541.77878                               | 0.00028                                                        |
| 24   | 2      | 23     | 25    | 2       | 24      | 1541.77878                               | 0.00028                                                        |
| 23   | 3      | 21     | 24    | 3       | 22      | 1541.79986                               | 0.00000                                                        |
| 23   | 2      | 21     | 24    | 2       | 22      | 1541.79986                               | 0.00000                                                        |
| 22   | 3      | 19     | 23    | 3       | 20      | 1541.82125                               | -0.00012                                                       |
| 22   | 4      | 19     | 23    | 4       | 20      | 1541.82125                               | -0.00012                                                       |
| 21   | 4      | 17     | 22    | 4       | 18      | 1541.84288                               | -0.00011                                                       |
| 21   | 5      | 17     | 22    | 5       | 18      | 1541.84288                               | -0.00011                                                       |
| 20   | 5      | 15     | 21    | 5       | 16      | 1541.86487                               | 0.00018                                                        |
| 20   | 6      | 15     | 21    | 6       | 16      | 1541.86487                               | 0.00018                                                        |
| 24   | 1      | 24     | 25    | 1       | 25      | 1541.87825                               | 0.00016                                                        |
| 24   | 0      | 24     | 25    | 0       | 25      | 1541.87825                               | 0.00016                                                        |
| 19   | 6      | 13     | 20    | 6       | 14      | 1541.88665                               | 0.00027                                                        |
| 19   | 7      | 13     | 20    | 7       | 14      | 1541.88665                               | 0.00027                                                        |
| 23   | 1      | 22     | 24    | 1       | 23      | 1541.89927                               | 0.00001                                                        |

Continuation, see next page

Continuation of Table 30:  $\nu_3 \leftarrow gs$  of dithiine.

| $J'$ | $K'_a$ | $K'_c$ | $J''$ | $K''_a$ | $K''_c$ | $\tilde{\nu}_{obs}$<br>/cm <sup>-1</sup> | $(\tilde{\nu}_{obs} - \tilde{\nu}_{cat})$<br>/cm <sup>-1</sup> |
|------|--------|--------|-------|---------|---------|------------------------------------------|----------------------------------------------------------------|
| 23   | 2      | 22     | 24    | 2       | 23      | 1541.89927                               | 0.00001                                                        |
| 18   | 7      | 11     | 19    | 7       | 12      | 1541.90790                               | 0.00001                                                        |
| 18   | 8      | 11     | 19    | 8       | 12      | 1541.90790                               | 0.00001                                                        |
| 22   | 3      | 20     | 23    | 3       | 21      | 1541.92050                               | -0.00009                                                       |
| 22   | 2      | 20     | 23    | 2       | 21      | 1541.92050                               | -0.00009                                                       |
| 21   | 4      | 18     | 22    | 4       | 19      | 1541.94225                               | 0.00019                                                        |
| 21   | 3      | 18     | 22    | 3       | 19      | 1541.94225                               | 0.00019                                                        |
| 20   | 5      | 16     | 21    | 5       | 17      | 1541.96373                               | 0.00009                                                        |
| 20   | 4      | 16     | 21    | 4       | 17      | 1541.96373                               | 0.00009                                                        |
| 19   | 6      | 14     | 20    | 6       | 15      | 1541.98499                               | -0.00029                                                       |
| 19   | 5      | 14     | 20    | 5       | 15      | 1541.98499                               | -0.00029                                                       |
| 23   | 1      | 23     | 24    | 1       | 24      | 1541.99863                               | -0.00012                                                       |
| 23   | 0      | 23     | 24    | 0       | 24      | 1541.99863                               | -0.00012                                                       |
| 18   | 7      | 12     | 19    | 7       | 13      | 1542.00701                               | 0.00012                                                        |
| 18   | 6      | 12     | 19    | 6       | 13      | 1542.00701                               | 0.00012                                                        |
| 22   | 2      | 21     | 23    | 2       | 22      | 1542.01990                               | 0.00001                                                        |
| 22   | 1      | 21     | 23    | 1       | 22      | 1542.01990                               | 0.00001                                                        |
| 21   | 3      | 19     | 22    | 3       | 20      | 1542.04071                               | -0.00047                                                       |
| 21   | 2      | 19     | 22    | 2       | 20      | 1542.04071                               | -0.00047                                                       |
| 20   | 3      | 17     | 21    | 3       | 18      | 1542.06273                               | 0.00012                                                        |
| 20   | 4      | 17     | 21    | 4       | 18      | 1542.06273                               | 0.00012                                                        |
| 19   | 4      | 15     | 20    | 4       | 16      | 1542.08410                               | -0.00005                                                       |
| 19   | 5      | 15     | 20    | 5       | 16      | 1542.08410                               | -0.00005                                                       |
| 18   | 6      | 13     | 19    | 6       | 14      | 1542.10594                               | 0.00021                                                        |
| 18   | 5      | 13     | 19    | 5       | 14      | 1542.10594                               | 0.00021                                                        |
| 22   | 0      | 22     | 23    | 0       | 23      | 1542.11913                               | -0.00014                                                       |
| 22   | 1      | 22     | 23    | 1       | 23      | 1542.11913                               | -0.00014                                                       |
| 17   | 6      | 11     | 18    | 6       | 12      | 1542.12744                               | 0.00021                                                        |
| 17   | 7      | 11     | 18    | 7       | 12      | 1542.12744                               | 0.00021                                                        |
| 21   | 2      | 20     | 22    | 2       | 21      | 1542.14071                               | 0.00033                                                        |
| 21   | 1      | 20     | 22    | 1       | 21      | 1542.14071                               | 0.00033                                                        |
| 19   | 3      | 16     | 20    | 3       | 17      | 1542.18281                               | -0.00022                                                       |
| 19   | 4      | 16     | 20    | 4       | 17      | 1542.18281                               | -0.00022                                                       |
| 18   | 4      | 14     | 19    | 4       | 15      | 1542.20464                               | 0.00012                                                        |
| 18   | 5      | 14     | 19    | 5       | 15      | 1542.20464                               | 0.00012                                                        |
| 17   | 5      | 12     | 18    | 5       | 13      | 1542.22582                               | -0.00021                                                       |
| 17   | 6      | 12     | 18    | 6       | 13      | 1542.22582                               | -0.00021                                                       |
| 21   | 0      | 21     | 22    | 0       | 22      | 1542.24024                               | 0.00058                                                        |
| 21   | 1      | 21     | 22    | 1       | 22      | 1542.24024                               | 0.00058                                                        |
| 16   | 7      | 10     | 17    | 7       | 11      | 1542.24764                               | 0.00024                                                        |
| 16   | 6      | 10     | 17    | 6       | 11      | 1542.24764                               | 0.00024                                                        |
| 20   | 1      | 19     | 21    | 1       | 20      | 1542.26104                               | 0.00031                                                        |
| 20   | 2      | 19     | 21    | 2       | 20      | 1542.26104                               | 0.00031                                                        |
| 15   | 7      | 8      | 16    | 7       | 9       | 1542.26771                               | -0.00045                                                       |
| 15   | 8      | 8      | 16    | 8       | 9       | 1542.26771                               | -0.00046                                                       |
| 19   | 3      | 17     | 20    | 3       | 18      | 1542.28205                               | 0.00010                                                        |

Continuation, see next page

Continuation of Table 30:  $\nu_3 \leftarrow gs$  of dithiine.

| $J'$ | $K'_a$ | $K'_c$ | $J''$ | $K''_a$ | $K''_c$ | $\tilde{\nu}_{obs}$<br>/cm <sup>-1</sup> | $(\tilde{\nu}_{obs} - \tilde{\nu}_{cat})$<br>/cm <sup>-1</sup> |
|------|--------|--------|-------|---------|---------|------------------------------------------|----------------------------------------------------------------|
| 19   | 2      | 17     | 20    | 2       | 18      | 1542.28205                               | 0.00010                                                        |
| 18   | 3      | 15     | 19    | 3       | 16      | 1542.30355                               | 0.00025                                                        |
| 18   | 4      | 15     | 19    | 4       | 16      | 1542.30355                               | 0.00025                                                        |
| 17   | 4      | 13     | 18    | 4       | 14      | 1542.32443                               | -0.00031                                                       |
| 17   | 5      | 13     | 18    | 5       | 14      | 1542.32443                               | -0.00031                                                       |
| 16   | 6      | 11     | 17    | 6       | 12      | 1542.34639                               | 0.00021                                                        |
| 16   | 5      | 11     | 17    | 5       | 12      | 1542.34639                               | 0.00021                                                        |
| 20   | 0      | 20     | 21    | 0       | 21      | 1542.36039                               | 0.00049                                                        |
| 20   | 1      | 20     | 21    | 1       | 21      | 1542.36039                               | 0.00049                                                        |
| 15   | 7      | 9      | 16    | 7       | 10      | 1542.36789                               | 0.00051                                                        |
| 15   | 6      | 9      | 16    | 6       | 10      | 1542.36789                               | 0.00051                                                        |
| 19   | 2      | 18     | 20    | 2       | 19      | 1542.38101                               | 0.00007                                                        |
| 19   | 1      | 18     | 20    | 1       | 19      | 1542.38101                               | 0.00007                                                        |
| 18   | 3      | 16     | 19    | 3       | 17      | 1542.40251                               | 0.00038                                                        |
| 18   | 2      | 16     | 19    | 2       | 17      | 1542.40251                               | 0.00038                                                        |
| 17   | 3      | 14     | 18    | 3       | 15      | 1542.42385                               | 0.00041                                                        |
| 17   | 4      | 14     | 18    | 4       | 15      | 1542.42385                               | 0.00041                                                        |
| 16   | 5      | 12     | 17    | 5       | 13      | 1542.44461                               | -0.00021                                                       |
| 16   | 4      | 12     | 17    | 4       | 13      | 1542.44461                               | -0.00021                                                       |
| 15   | 5      | 10     | 16    | 5       | 11      | 1542.46654                               | 0.00038                                                        |
| 15   | 6      | 10     | 16    | 6       | 11      | 1542.46654                               | 0.00038                                                        |
| 19   | 0      | 19     | 20    | 0       | 20      | 1542.47994                               | -0.00007                                                       |
| 19   | 1      | 19     | 20    | 1       | 20      | 1542.47994                               | -0.00007                                                       |
| 18   | 1      | 17     | 19    | 1       | 18      | 1542.50084                               | -0.00017                                                       |
| 18   | 2      | 17     | 19    | 2       | 18      | 1542.50084                               | -0.00017                                                       |
| 13   | 8      | 6      | 14    | 8       | 7       | 1542.50641                               | -0.00041                                                       |
| 13   | 7      | 6      | 14    | 7       | 7       | 1542.50641                               | 0.00014                                                        |
| 17   | 3      | 15     | 18    | 3       | 16      | 1542.52232                               | 0.00016                                                        |
| 17   | 2      | 15     | 18    | 2       | 16      | 1542.52232                               | 0.00016                                                        |
| 16   | 3      | 13     | 17    | 3       | 14      | 1542.54329                               | -0.00014                                                       |
| 16   | 4      | 13     | 17    | 4       | 14      | 1542.54329                               | -0.00014                                                       |
| 15   | 4      | 11     | 16    | 4       | 12      | 1542.56469                               | -0.00006                                                       |
| 15   | 5      | 11     | 16    | 5       | 12      | 1542.56469                               | -0.00006                                                       |
| 14   | 6      | 9      | 15    | 6       | 10      | 1542.58564                               | -0.00034                                                       |
| 14   | 5      | 9      | 15    | 5       | 10      | 1542.58564                               | -0.00034                                                       |
| 18   | 1      | 18     | 19    | 1       | 19      | 1542.59976                               | -0.00021                                                       |
| 18   | 0      | 18     | 19    | 0       | 19      | 1542.59976                               | -0.00021                                                       |
| 13   | 6      | 7      | 14    | 6       | 8       | 1542.60607                               | -0.00055                                                       |
| 13   | 7      | 7      | 14    | 7       | 8       | 1542.60607                               | -0.00057                                                       |
| 17   | 1      | 16     | 18    | 1       | 17      | 1542.62099                               | 0.00005                                                        |
| 17   | 2      | 16     | 18    | 2       | 17      | 1542.62099                               | 0.00005                                                        |
| 16   | 3      | 14     | 17    | 3       | 15      | 1542.64214                               | 0.00009                                                        |
| 16   | 2      | 14     | 17    | 2       | 15      | 1542.64214                               | 0.00009                                                        |
| 15   | 4      | 12     | 16    | 4       | 13      | 1542.66356                               | 0.00029                                                        |
| 15   | 3      | 12     | 16    | 3       | 13      | 1542.66356                               | 0.00029                                                        |
| 14   | 5      | 10     | 15    | 5       | 11      | 1542.68466                               | 0.00013                                                        |

Continuation, see next page

Continuation of Table 30:  $\nu_3 \leftarrow gs$  of dithiine.

| $J'$ | $K'_a$ | $K'_c$ | $J''$ | $K''_a$ | $K''_c$ | $\tilde{\nu}_{obs}$<br>/cm <sup>-1</sup> | $(\tilde{\nu}_{obs} - \tilde{\nu}_{cat})$<br>/cm <sup>-1</sup> |
|------|--------|--------|-------|---------|---------|------------------------------------------|----------------------------------------------------------------|
| 14   | 4      | 10     | 15    | 4       | 11      | 1542.68466                               | 0.00013                                                        |
| 13   | 5      | 8      | 14    | 5       | 9       | 1542.70549                               | -0.00012                                                       |
| 13   | 6      | 8      | 14    | 6       | 9       | 1542.70549                               | -0.00012                                                       |
| 17   | 0      | 17     | 18    | 0       | 18      | 1542.71982                               | 0.00002                                                        |
| 17   | 1      | 17     | 18    | 1       | 18      | 1542.71982                               | 0.00002                                                        |
| 12   | 7      | 6      | 13    | 7       | 7       | 1542.72524                               | -0.00059                                                       |
| 12   | 6      | 6      | 13    | 6       | 7       | 1542.72524                               | -0.00038                                                       |
| 16   | 2      | 15     | 17    | 2       | 16      | 1542.74090                               | 0.00017                                                        |
| 16   | 1      | 15     | 17    | 1       | 16      | 1542.74090                               | 0.00017                                                        |
| 15   | 3      | 13     | 16    | 3       | 14      | 1542.76160                               | -0.00020                                                       |
| 15   | 2      | 13     | 16    | 2       | 14      | 1542.76160                               | -0.00020                                                       |
| 14   | 3      | 11     | 15    | 3       | 12      | 1542.78298                               | 0.00001                                                        |
| 14   | 4      | 11     | 15    | 4       | 12      | 1542.78298                               | 0.00001                                                        |
| 13   | 4      | 9      | 14    | 4       | 10      | 1542.80413                               | -0.00002                                                       |
| 13   | 5      | 9      | 14    | 5       | 10      | 1542.80413                               | -0.00002                                                       |
| 16   | 0      | 16     | 17    | 0       | 17      | 1542.83950                               | 0.00002                                                        |
| 16   | 1      | 16     | 17    | 1       | 17      | 1542.83950                               | 0.00002                                                        |
| 15   | 2      | 14     | 16    | 2       | 15      | 1542.86024                               | -0.00013                                                       |
| 15   | 1      | 14     | 16    | 1       | 15      | 1542.86024                               | -0.00013                                                       |
| 14   | 2      | 12     | 15    | 2       | 13      | 1542.88090                               | -0.00051                                                       |
| 14   | 3      | 12     | 15    | 3       | 13      | 1542.88090                               | -0.00051                                                       |
| 13   | 3      | 10     | 14    | 3       | 11      | 1542.90289                               | 0.00036                                                        |
| 13   | 4      | 10     | 14    | 4       | 11      | 1542.90289                               | 0.00036                                                        |
| 12   | 5      | 8      | 13    | 5       | 9       | 1542.92389                               | 0.00028                                                        |
| 12   | 4      | 8      | 13    | 4       | 9       | 1542.92389                               | 0.00028                                                        |
| 11   | 6      | 6      | 12    | 6       | 7       | 1542.94445                               | 0.00027                                                        |
| 11   | 5      | 6      | 12    | 5       | 7       | 1542.94445                               | 0.00034                                                        |
| 10   | 6      | 4      | 11    | 6       | 5       | 1542.95598                               | -0.00017                                                       |
| 10   | 7      | 4      | 11    | 7       | 5       | 1542.96630                               | 0.00016                                                        |
| 13   | 2      | 11     | 14    | 2       | 12      | 1543.00102                               | 0.00015                                                        |
| 13   | 3      | 11     | 14    | 3       | 12      | 1543.00102                               | 0.00015                                                        |
| 12   | 3      | 9      | 13    | 3       | 10      | 1543.02167                               | -0.00026                                                       |
| 12   | 4      | 9      | 13    | 4       | 10      | 1543.02167                               | -0.00026                                                       |
| 14   | 0      | 14     | 15    | 0       | 15      | 1543.07830                               | -0.00011                                                       |
| 14   | 1      | 14     | 15    | 1       | 15      | 1543.07830                               | -0.00011                                                       |
| 13   | 1      | 12     | 14    | 1       | 13      | 1543.09908                               | -0.00016                                                       |
| 13   | 2      | 12     | 14    | 2       | 13      | 1543.09908                               | -0.00016                                                       |
| 12   | 3      | 10     | 13    | 3       | 11      | 1543.12048                               | 0.00029                                                        |
| 12   | 2      | 10     | 13    | 2       | 11      | 1543.12048                               | 0.00029                                                        |
| 11   | 4      | 8      | 12    | 4       | 9       | 1543.14102                               | -0.00016                                                       |
| 11   | 3      | 8      | 12    | 3       | 9       | 1543.14102                               | -0.00016                                                       |
| 10   | 5      | 6      | 11    | 5       | 7       | 1543.16153                               | -0.00042                                                       |
| 10   | 4      | 6      | 11    | 4       | 7       | 1543.16153                               | -0.00040                                                       |
| 13   | 0      | 13     | 14    | 0       | 14      | 1543.19747                               | -0.00020                                                       |
| 13   | 1      | 13     | 14    | 1       | 14      | 1543.19747                               | -0.00020                                                       |
| 12   | 1      | 11     | 13    | 1       | 12      | 1543.21849                               | 0.00004                                                        |

Continuation, see next page

Continuation of Table 30:  $\nu_3 \leftarrow gs$  of dithiine.

| $J'$ | $K'_a$ | $K'_c$ | $J''$ | $K''_a$ | $K''_c$ | $\tilde{\nu}_{obs}$<br>/cm <sup>-1</sup> | $(\tilde{\nu}_{obs} - \tilde{\nu}_{cat})$<br>/cm <sup>-1</sup> |
|------|--------|--------|-------|---------|---------|------------------------------------------|----------------------------------------------------------------|
| 12   | 2      | 11     | 13    | 2       | 12      | 1543.21849                               | 0.00004                                                        |
| 10   | 4      | 7      | 11    | 4       | 8       | 1543.26043                               | 0.00016                                                        |
| 10   | 3      | 7      | 11    | 3       | 8       | 1543.26043                               | 0.00016                                                        |
| 9    | 4      | 5      | 10    | 4       | 6       | 1543.28035                               | -0.00025                                                       |
| 8    | 5      | 3      | 9     | 5       | 4       | 1543.28575                               | 0.00001                                                        |
| 8    | 6      | 3      | 9     | 6       | 4       | 1543.30882                               | 0.00025                                                        |
| 8    | 5      | 4      | 7     | 5       | 3       | 1546.26292                               | 0.00016                                                        |
| 9    | 3      | 6      | 8     | 3       | 5       | 1546.28462                               | -0.00007                                                       |
| 9    | 4      | 6      | 8     | 4       | 5       | 1546.28462                               | -0.00002                                                       |
| 10   | 2      | 8      | 9     | 2       | 7       | 1546.30337                               | -0.00026                                                       |
| 10   | 3      | 8      | 9     | 3       | 7       | 1546.30337                               | -0.00026                                                       |
| 11   | 2      | 10     | 10    | 2       | 9       | 1546.32257                               | -0.00036                                                       |
| 11   | 1      | 10     | 10    | 1       | 9       | 1546.32257                               | -0.00036                                                       |
| 12   | 0      | 12     | 11    | 0       | 11      | 1546.34253                               | 0.00012                                                        |
| 12   | 1      | 12     | 11    | 1       | 11      | 1546.34253                               | 0.00012                                                        |
| 9    | 5      | 5      | 8     | 5       | 4       | 1546.38090                               | -0.00008                                                       |
| 9    | 4      | 5      | 8     | 4       | 4       | 1546.38231                               | -0.00017                                                       |
| 8    | 5      | 3      | 7     | 5       | 2       | 1546.38679                               | -0.00009                                                       |
| 10   | 3      | 7      | 9     | 3       | 6       | 1546.39991                               | 0.00006                                                        |
| 10   | 4      | 7      | 9     | 4       | 6       | 1546.39991                               | 0.00007                                                        |
| 11   | 3      | 9      | 10    | 3       | 8       | 1546.41904                               | 0.00018                                                        |
| 11   | 2      | 9      | 10    | 2       | 8       | 1546.41904                               | 0.00018                                                        |
| 12   | 1      | 11     | 11    | 1       | 10      | 1546.43837                               | 0.00024                                                        |
| 12   | 2      | 11     | 11    | 2       | 10      | 1546.43837                               | 0.00024                                                        |
| 13   | 1      | 13     | 12    | 1       | 12      | 1546.45769                               | 0.00012                                                        |
| 13   | 0      | 13     | 12    | 0       | 12      | 1546.45769                               | 0.00012                                                        |
| 10   | 4      | 6      | 9     | 4       | 5       | 1546.49625                               | -0.00025                                                       |
| 10   | 5      | 6      | 9     | 5       | 5       | 1546.49625                               | -0.00008                                                       |
| 11   | 4      | 8      | 10    | 4       | 7       | 1546.51461                               | -0.00032                                                       |
| 11   | 3      | 8      | 10    | 3       | 7       | 1546.51461                               | -0.00032                                                       |
| 12   | 2      | 10     | 11    | 2       | 9       | 1546.53374                               | -0.00021                                                       |
| 12   | 3      | 10     | 11    | 3       | 9       | 1546.53374                               | -0.00021                                                       |
| 13   | 2      | 12     | 12    | 2       | 11      | 1546.55351                               | 0.00032                                                        |
| 13   | 1      | 12     | 12    | 1       | 11      | 1546.55351                               | 0.00032                                                        |
| 14   | 0      | 14     | 13    | 0       | 13      | 1546.57263                               | 0.00004                                                        |
| 14   | 1      | 14     | 13    | 1       | 13      | 1546.57263                               | 0.00004                                                        |
| 10   | 6      | 5      | 9     | 6       | 4       | 1546.59235                               | 0.00004                                                        |
| 11   | 5      | 7      | 10    | 5       | 6       | 1546.61173                               | 0.00052                                                        |
| 11   | 4      | 7      | 10    | 4       | 6       | 1546.61173                               | 0.00051                                                        |
| 12   | 3      | 9      | 11    | 3       | 8       | 1546.63014                               | 0.00026                                                        |
| 12   | 4      | 9      | 11    | 4       | 8       | 1546.63014                               | 0.00026                                                        |
| 15   | 1      | 15     | 14    | 1       | 14      | 1546.68749                               | 0.00003                                                        |
| 15   | 0      | 15     | 14    | 0       | 14      | 1546.68749                               | 0.00003                                                        |
| 11   | 6      | 6      | 10    | 6       | 5       | 1546.70788                               | 0.00005                                                        |
| 11   | 5      | 6      | 10    | 5       | 5       | 1546.70812                               | -0.00020                                                       |
| 10   | 6      | 4      | 9     | 6       | 3       | 1546.71071                               | -0.00006                                                       |

Continuation, see next page

Continuation of Table 30:  $\nu_3 \leftarrow gs$  of dithiine.

| $J'$ | $K'_a$ | $K'_c$ | $J''$ | $K''_a$ | $K''_c$ | $\tilde{\nu}_{obs}$<br>/cm <sup>-1</sup> | $(\tilde{\nu}_{obs} - \tilde{\nu}_{cat})$<br>/cm <sup>-1</sup> |
|------|--------|--------|-------|---------|---------|------------------------------------------|----------------------------------------------------------------|
| 12   | 4      | 8      | 11    | 4       | 7       | 1546.72601                               | 0.00003                                                        |
| 12   | 5      | 8      | 11    | 5       | 7       | 1546.72601                               | 0.00003                                                        |
| 13   | 4      | 10     | 12    | 4       | 9       | 1546.74489                               | 0.00019                                                        |
| 13   | 3      | 10     | 12    | 3       | 9       | 1546.74489                               | 0.00019                                                        |
| 14   | 2      | 12     | 13    | 2       | 11      | 1546.76408                               | 0.00039                                                        |
| 14   | 3      | 12     | 13    | 3       | 11      | 1546.76408                               | 0.00039                                                        |
| 15   | 2      | 14     | 14    | 2       | 13      | 1546.78274                               | -0.00012                                                       |
| 15   | 1      | 14     | 14    | 1       | 13      | 1546.78274                               | -0.00012                                                       |
| 16   | 0      | 16     | 15    | 0       | 15      | 1546.80187                               | -0.00031                                                       |
| 16   | 1      | 16     | 15    | 1       | 15      | 1546.80187                               | -0.00031                                                       |
| 13   | 5      | 9      | 12    | 5       | 8       | 1546.84065                               | 0.00001                                                        |
| 13   | 4      | 9      | 12    | 4       | 8       | 1546.84065                               | 0.00001                                                        |
| 14   | 3      | 11     | 13    | 3       | 10      | 1546.85949                               | 0.00011                                                        |
| 14   | 4      | 11     | 13    | 4       | 10      | 1546.85949                               | 0.00011                                                        |
| 15   | 3      | 13     | 14    | 3       | 12      | 1546.87805                               | -0.00029                                                       |
| 15   | 2      | 13     | 14    | 2       | 12      | 1546.87805                               | -0.00029                                                       |
| 16   | 1      | 15     | 15    | 1       | 14      | 1546.89753                               | 0.00006                                                        |
| 16   | 2      | 15     | 15    | 2       | 14      | 1546.89753                               | 0.00006                                                        |
| 17   | 1      | 17     | 16    | 1       | 16      | 1546.91690                               | 0.00014                                                        |
| 17   | 0      | 17     | 16    | 0       | 16      | 1546.91690                               | 0.00014                                                        |
| 13   | 6      | 8      | 12    | 6       | 7       | 1546.93647                               | -0.00034                                                       |
| 13   | 5      | 8      | 12    | 5       | 7       | 1546.93647                               | -0.00034                                                       |
| 14   | 4      | 10     | 13    | 4       | 9       | 1546.95494                               | -0.00024                                                       |
| 14   | 5      | 10     | 13    | 5       | 9       | 1546.95494                               | -0.00024                                                       |
| 15   | 4      | 12     | 14    | 4       | 11      | 1546.97431                               | 0.00039                                                        |
| 15   | 3      | 12     | 14    | 3       | 11      | 1546.97431                               | 0.00039                                                        |
| 16   | 2      | 14     | 15    | 2       | 13      | 1546.99316                               | 0.00031                                                        |
| 16   | 3      | 14     | 15    | 3       | 13      | 1546.99316                               | 0.00031                                                        |
| 17   | 2      | 16     | 16    | 2       | 15      | 1547.01231                               | 0.00037                                                        |
| 17   | 1      | 16     | 16    | 1       | 15      | 1547.01231                               | 0.00037                                                        |
| 18   | 0      | 18     | 17    | 0       | 17      | 1547.03118                               | 0.00000                                                        |
| 18   | 1      | 18     | 17    | 1       | 17      | 1547.03118                               | 0.00000                                                        |
| 13   | 6      | 7      | 12    | 6       | 6       | 1547.03298                               | -0.00057                                                       |
| 13   | 7      | 7      | 12    | 7       | 6       | 1547.03298                               | -0.00042                                                       |
| 14   | 5      | 9      | 13    | 5       | 8       | 1547.05111                               | -0.00005                                                       |
| 14   | 6      | 9      | 13    | 6       | 8       | 1547.05111                               | -0.00005                                                       |
| 15   | 5      | 11     | 14    | 5       | 10      | 1547.06956                               | -0.00004                                                       |
| 15   | 4      | 11     | 14    | 4       | 10      | 1547.06956                               | -0.00004                                                       |
| 16   | 3      | 13     | 15    | 3       | 12      | 1547.08841                               | 0.00010                                                        |
| 16   | 4      | 13     | 15    | 4       | 12      | 1547.08841                               | 0.00010                                                        |
| 17   | 3      | 15     | 16    | 3       | 14      | 1547.10754                               | 0.00033                                                        |
| 17   | 2      | 15     | 16    | 2       | 14      | 1547.10754                               | 0.00033                                                        |
| 18   | 1      | 17     | 17    | 1       | 16      | 1547.12595                               | -0.00031                                                       |
| 18   | 2      | 17     | 17    | 2       | 16      | 1547.12595                               | -0.00031                                                       |
| 19   | 1      | 19     | 18    | 1       | 18      | 1547.14546                               | -0.00001                                                       |
| 19   | 0      | 19     | 18    | 0       | 18      | 1547.14546                               | -0.00001                                                       |

Continuation, see next page

Continuation of Table 30:  $\nu_3 \leftarrow gs$  of dithiine.

| $J'$ | $K'_a$ | $K'_c$ | $J''$ | $K''_a$ | $K''_c$ | $\bar{\nu}_{obs}$<br>/cm <sup>-1</sup> | $(\bar{\nu}_{obs} - \bar{\nu}_{cat})$<br>/cm <sup>-1</sup> |
|------|--------|--------|-------|---------|---------|----------------------------------------|------------------------------------------------------------|
| 15   | 6      | 10     | 14    | 6       | 9       | 1547.16528                             | -0.00013                                                   |
| 15   | 5      | 10     | 14    | 5       | 9       | 1547.16528                             | -0.00013                                                   |
| 16   | 4      | 12     | 15    | 4       | 11      | 1547.18385                             | -0.00002                                                   |
| 16   | 5      | 12     | 15    | 5       | 11      | 1547.18385                             | -0.00002                                                   |
| 17   | 4      | 14     | 16    | 4       | 13      | 1547.20259                             | 0.00003                                                    |
| 17   | 3      | 14     | 16    | 3       | 13      | 1547.20259                             | 0.00003                                                    |
| 18   | 2      | 16     | 17    | 2       | 15      | 1547.22155                             | 0.00012                                                    |
| 18   | 3      | 16     | 17    | 3       | 15      | 1547.22155                             | 0.00012                                                    |
| 19   | 2      | 18     | 18    | 2       | 17      | 1547.24056                             | 0.00012                                                    |
| 19   | 1      | 18     | 18    | 1       | 17      | 1547.24056                             | 0.00012                                                    |
| 20   | 0      | 20     | 19    | 0       | 19      | 1547.25992                             | 0.00032                                                    |
| 20   | 1      | 20     | 19    | 1       | 19      | 1547.25992                             | 0.00032                                                    |
| 15   | 7      | 9      | 14    | 7       | 8       | 1547.26086                             | -0.00059                                                   |
| 15   | 6      | 9      | 14    | 6       | 8       | 1547.26086                             | -0.00059                                                   |
| 16   | 5      | 11     | 15    | 5       | 10      | 1547.27946                             | -0.00008                                                   |
| 16   | 6      | 11     | 15    | 6       | 10      | 1547.27946                             | -0.00008                                                   |
| 18   | 3      | 15     | 17    | 3       | 14      | 1547.31640                             | -0.00027                                                   |
| 18   | 4      | 15     | 17    | 4       | 14      | 1547.31640                             | -0.00027                                                   |
| 19   | 3      | 17     | 18    | 3       | 16      | 1547.33562                             | 0.00012                                                    |
| 19   | 2      | 17     | 18    | 2       | 16      | 1547.33562                             | 0.00012                                                    |
| 20   | 1      | 19     | 19    | 1       | 18      | 1547.35464                             | 0.00017                                                    |
| 20   | 2      | 19     | 19    | 2       | 18      | 1547.35464                             | 0.00017                                                    |
| 21   | 1      | 21     | 20    | 1       | 20      | 1547.37390                             | 0.00031                                                    |
| 21   | 0      | 21     | 20    | 0       | 20      | 1547.37390                             | 0.00031                                                    |
| 16   | 6      | 10     | 15    | 6       | 9       | 1547.37507                             | -0.00032                                                   |
| 16   | 7      | 10     | 15    | 7       | 9       | 1547.37507                             | -0.00032                                                   |
| 17   | 6      | 12     | 16    | 6       | 11      | 1547.39363                             | 0.00008                                                    |
| 17   | 5      | 12     | 16    | 5       | 11      | 1547.39363                             | 0.00008                                                    |
| 18   | 4      | 14     | 17    | 4       | 13      | 1547.41217                             | 0.00017                                                    |
| 18   | 5      | 14     | 17    | 5       | 13      | 1547.41217                             | 0.00017                                                    |
| 19   | 4      | 16     | 18    | 4       | 15      | 1547.43085                             | 0.00021                                                    |
| 19   | 3      | 16     | 18    | 3       | 15      | 1547.43085                             | 0.00021                                                    |
| 20   | 2      | 18     | 19    | 2       | 17      | 1547.44948                             | 0.00006                                                    |
| 20   | 3      | 18     | 19    | 3       | 17      | 1547.44948                             | 0.00006                                                    |
| 21   | 2      | 20     | 20    | 2       | 19      | 1547.46821                             | -0.00015                                                   |
| 21   | 1      | 20     | 20    | 1       | 19      | 1547.46821                             | -0.00015                                                   |
| 16   | 7      | 9      | 15    | 7       | 8       | 1547.47116                             | -0.00037                                                   |
| 16   | 8      | 9      | 15    | 8       | 8       | 1547.47116                             | -0.00036                                                   |
| 22   | 0      | 22     | 21    | 0       | 21      | 1547.48773                             | 0.00029                                                    |
| 22   | 1      | 22     | 21    | 1       | 21      | 1547.48773                             | 0.00029                                                    |
| 17   | 7      | 11     | 16    | 7       | 10      | 1547.48874                             | -0.00049                                                   |
| 17   | 6      | 11     | 16    | 6       | 10      | 1547.48874                             | -0.00049                                                   |
| 18   | 5      | 13     | 17    | 5       | 12      | 1547.50760                             | 0.00017                                                    |
| 18   | 6      | 13     | 17    | 6       | 12      | 1547.50760                             | 0.00017                                                    |
| 19   | 5      | 15     | 18    | 5       | 14      | 1547.52617                             | 0.00031                                                    |
| 19   | 4      | 15     | 18    | 4       | 14      | 1547.52617                             | 0.00031                                                    |

Continuation, see next page

Continuation of Table 30:  $\nu_3 \leftarrow gs$  of dithiine.

| $J'$ | $K'_a$ | $K'_c$ | $J''$ | $K''_a$ | $K''_c$ | $\tilde{\nu}_{obs}$<br>/cm <sup>-1</sup> | $(\tilde{\nu}_{obs} - \tilde{\nu}_{cat})$<br>/cm <sup>-1</sup> |
|------|--------|--------|-------|---------|---------|------------------------------------------|----------------------------------------------------------------|
| 20   | 3      | 17     | 19    | 3       | 16      | 1547.54443                               | -0.00002                                                       |
| 20   | 4      | 17     | 19    | 4       | 16      | 1547.54443                               | -0.00002                                                       |
| 21   | 3      | 19     | 20    | 3       | 18      | 1547.56341                               | 0.00021                                                        |
| 21   | 2      | 19     | 20    | 2       | 18      | 1547.56341                               | 0.00021                                                        |
| 22   | 1      | 21     | 21    | 1       | 20      | 1547.58249                               | 0.00039                                                        |
| 22   | 2      | 21     | 21    | 2       | 20      | 1547.58249                               | 0.00039                                                        |
| 17   | 8      | 10     | 16    | 8       | 9       | 1547.58502                               | -0.00011                                                       |
| 17   | 7      | 10     | 16    | 7       | 9       | 1547.58502                               | -0.00011                                                       |
| 23   | 1      | 23     | 22    | 1       | 22      | 1547.60120                               | 0.00006                                                        |
| 23   | 0      | 23     | 22    | 0       | 22      | 1547.60120                               | 0.00006                                                        |
| 18   | 6      | 12     | 17    | 6       | 11      | 1547.60291                               | -0.00006                                                       |
| 18   | 7      | 12     | 17    | 7       | 11      | 1547.60291                               | -0.00006                                                       |
| 19   | 6      | 14     | 18    | 6       | 13      | 1547.62104                               | -0.00012                                                       |
| 19   | 5      | 14     | 18    | 5       | 13      | 1547.62104                               | -0.00012                                                       |
| 20   | 4      | 16     | 19    | 4       | 15      | 1547.63920                               | -0.00037                                                       |
| 20   | 5      | 16     | 19    | 5       | 15      | 1547.63920                               | -0.00037                                                       |
| 21   | 4      | 18     | 20    | 4       | 17      | 1547.65796                               | -0.00017                                                       |
| 21   | 3      | 18     | 20    | 3       | 17      | 1547.65796                               | -0.00017                                                       |
| 22   | 2      | 20     | 21    | 2       | 19      | 1547.67692                               | 0.00008                                                        |
| 22   | 3      | 20     | 21    | 3       | 19      | 1547.67692                               | 0.00008                                                        |
| 23   | 2      | 22     | 22    | 2       | 21      | 1547.69555                               | -0.00015                                                       |
| 23   | 1      | 22     | 22    | 1       | 21      | 1547.69555                               | -0.00015                                                       |
| 18   | 7      | 11     | 17    | 7       | 10      | 1547.69899                               | 0.00032                                                        |
| 18   | 8      | 11     | 17    | 8       | 10      | 1547.69899                               | 0.00032                                                        |
| 24   | 0      | 24     | 23    | 0       | 23      | 1547.71483                               | 0.00013                                                        |
| 24   | 1      | 24     | 23    | 1       | 23      | 1547.71483                               | 0.00013                                                        |
| 19   | 7      | 13     | 18    | 7       | 12      | 1547.71614                               | -0.00043                                                       |
| 19   | 6      | 13     | 18    | 6       | 12      | 1547.71614                               | -0.00043                                                       |
| 20   | 5      | 15     | 19    | 5       | 14      | 1547.73444                               | -0.00032                                                       |
| 20   | 6      | 15     | 19    | 6       | 14      | 1547.73444                               | -0.00032                                                       |
| 21   | 5      | 17     | 20    | 5       | 16      | 1547.75286                               | -0.00028                                                       |
| 21   | 4      | 17     | 20    | 4       | 16      | 1547.75286                               | -0.00028                                                       |
| 22   | 3      | 19     | 21    | 3       | 18      | 1547.77176                               | 0.00010                                                        |
| 22   | 4      | 19     | 21    | 4       | 18      | 1547.77176                               | 0.00010                                                        |
| 23   | 3      | 21     | 22    | 3       | 20      | 1547.79014                               | -0.00020                                                       |
| 23   | 2      | 21     | 22    | 2       | 20      | 1547.79014                               | -0.00020                                                       |
| 24   | 1      | 23     | 23    | 1       | 22      | 1547.80926                               | 0.00011                                                        |
| 24   | 2      | 23     | 23    | 2       | 22      | 1547.80926                               | 0.00011                                                        |
| 25   | 1      | 25     | 24    | 1       | 24      | 1547.82767                               | -0.00044                                                       |
| 25   | 0      | 25     | 24    | 0       | 24      | 1547.82767                               | -0.00044                                                       |
| 20   | 6      | 14     | 19    | 6       | 13      | 1547.83044                               | 0.00039                                                        |
| 20   | 7      | 14     | 19    | 7       | 13      | 1547.83044                               | 0.00039                                                        |
| 21   | 6      | 16     | 20    | 6       | 15      | 1547.84828                               | 0.00006                                                        |
| 21   | 5      | 16     | 20    | 5       | 15      | 1547.84828                               | 0.00006                                                        |
| 22   | 4      | 18     | 21    | 4       | 17      | 1547.86607                               | -0.00049                                                       |
| 22   | 5      | 18     | 21    | 5       | 17      | 1547.86607                               | -0.00049                                                       |

Continuation, see next page

Continuation of Table 30:  $\nu_3 \leftarrow gs$  of dithiine.

| $J'$ | $K'_a$ | $K'_c$ | $J''$ | $K''_a$ | $K''_c$ | $\tilde{\nu}_{obs}$<br>/cm <sup>-1</sup> | $(\tilde{\nu}_{obs} - \tilde{\nu}_{cat})$<br>/cm <sup>-1</sup> |
|------|--------|--------|-------|---------|---------|------------------------------------------|----------------------------------------------------------------|
| 23   | 4      | 20     | 22    | 4       | 19      | 1547.88468                               | -0.00037                                                       |
| 23   | 3      | 20     | 22    | 3       | 19      | 1547.88468                               | -0.00037                                                       |
| 24   | 2      | 22     | 23    | 2       | 21      | 1547.90376                               | 0.00007                                                        |
| 24   | 3      | 22     | 23    | 3       | 21      | 1547.90376                               | 0.00007                                                        |
| 25   | 2      | 24     | 24    | 2       | 23      | 1547.92250                               | 0.00004                                                        |
| 25   | 1      | 24     | 24    | 1       | 23      | 1547.92250                               | 0.00004                                                        |
| 20   | 7      | 13     | 19    | 7       | 12      | 1547.92588                               | 0.00042                                                        |
| 20   | 8      | 13     | 19    | 8       | 12      | 1547.92588                               | 0.00042                                                        |
| 26   | 0      | 26     | 25    | 0       | 25      | 1547.94096                               | -0.00042                                                       |
| 26   | 1      | 26     | 25    | 1       | 25      | 1547.94096                               | -0.00042                                                       |
| 21   | 7      | 15     | 20    | 7       | 14      | 1547.94307                               | -0.00033                                                       |
| 21   | 6      | 15     | 20    | 6       | 14      | 1547.94307                               | -0.00033                                                       |
| 22   | 5      | 17     | 21    | 5       | 16      | 1547.96148                               | -0.00006                                                       |
| 22   | 6      | 17     | 21    | 6       | 16      | 1547.96148                               | -0.00006                                                       |
| 23   | 5      | 19     | 22    | 5       | 18      | 1547.97978                               | -0.00007                                                       |
| 23   | 4      | 19     | 22    | 4       | 18      | 1547.97978                               | -0.00007                                                       |
| 24   | 3      | 21     | 23    | 3       | 20      | 1547.99802                               | -0.00028                                                       |
| 24   | 4      | 21     | 23    | 4       | 20      | 1547.99802                               | -0.00028                                                       |
| 25   | 3      | 23     | 24    | 3       | 22      | 1548.01725                               | 0.00036                                                        |
| 25   | 2      | 23     | 24    | 2       | 22      | 1548.01725                               | 0.00036                                                        |
| 20   | 8      | 12     | 19    | 8       | 11      | 1548.02076                               | -0.00026                                                       |
| 20   | 9      | 12     | 19    | 9       | 11      | 1548.02076                               | -0.00026                                                       |
| 26   | 1      | 25     | 25    | 1       | 24      | 1548.03547                               | -0.00016                                                       |
| 26   | 2      | 25     | 25    | 2       | 24      | 1548.03547                               | -0.00016                                                       |
| 21   | 8      | 14     | 20    | 8       | 13      | 1548.03865                               | -0.00002                                                       |
| 21   | 7      | 14     | 20    | 7       | 13      | 1548.03865                               | -0.00002                                                       |
| 27   | 1      | 27     | 26    | 1       | 26      | 1548.05474                               | 0.00023                                                        |
| 27   | 0      | 27     | 26    | 0       | 26      | 1548.05474                               | 0.00023                                                        |
| 22   | 6      | 16     | 21    | 6       | 15      | 1548.05607                               | -0.00053                                                       |
| 22   | 7      | 16     | 21    | 7       | 15      | 1548.05607                               | -0.00053                                                       |
| 23   | 6      | 18     | 22    | 6       | 17      | 1548.07470                               | -0.00002                                                       |
| 23   | 5      | 18     | 22    | 5       | 17      | 1548.07470                               | -0.00002                                                       |
| 24   | 4      | 20     | 23    | 4       | 19      | 1548.09295                               | -0.00004                                                       |
| 24   | 5      | 20     | 23    | 5       | 19      | 1548.09295                               | -0.00004                                                       |
| 25   | 4      | 22     | 24    | 4       | 21      | 1548.11146                               | 0.00005                                                        |
| 25   | 3      | 22     | 24    | 3       | 21      | 1548.11146                               | 0.00005                                                        |
| 26   | 2      | 24     | 25    | 2       | 23      | 1548.13011                               | 0.00015                                                        |
| 26   | 3      | 24     | 25    | 3       | 23      | 1548.13011                               | 0.00015                                                        |
| 27   | 2      | 26     | 26    | 2       | 25      | 1548.14863                               | -0.00002                                                       |
| 27   | 1      | 26     | 26    | 1       | 25      | 1548.14863                               | -0.00002                                                       |
| 22   | 7      | 15     | 21    | 7       | 14      | 1548.15198                               | 0.00022                                                        |
| 22   | 8      | 15     | 21    | 8       | 14      | 1548.15198                               | 0.00022                                                        |
| 28   | 0      | 28     | 27    | 0       | 27      | 1548.16769                               | 0.00020                                                        |
| 28   | 1      | 28     | 27    | 1       | 27      | 1548.16769                               | 0.00020                                                        |
| 23   | 7      | 17     | 22    | 7       | 16      | 1548.16973                               | 0.00006                                                        |
| 23   | 6      | 17     | 22    | 6       | 16      | 1548.16973                               | 0.00006                                                        |

Continuation, see next page

Continuation of Table 30:  $\nu_3 \leftarrow gs$  of dithiine.

| $J'$ | $K'_a$ | $K'_c$ | $J''$ | $K''_a$ | $K''_c$ | $\tilde{\nu}_{obs}$<br>/cm <sup>-1</sup> | $(\tilde{\nu}_{obs} - \tilde{\nu}_{cat})$<br>/cm <sup>-1</sup> |
|------|--------|--------|-------|---------|---------|------------------------------------------|----------------------------------------------------------------|
| 24   | 5      | 19     | 23    | 5       | 18      | 1548.18794                               | 0.00018                                                        |
| 24   | 6      | 19     | 23    | 6       | 18      | 1548.18794                               | 0.00018                                                        |
| 25   | 5      | 21     | 24    | 5       | 20      | 1548.20603                               | 0.00003                                                        |
| 25   | 4      | 21     | 24    | 4       | 20      | 1548.20603                               | 0.00003                                                        |
| 26   | 3      | 23     | 25    | 3       | 22      | 1548.22439                               | 0.00002                                                        |
| 26   | 4      | 23     | 25    | 4       | 22      | 1548.22439                               | 0.00002                                                        |
| 21   | 10     | 12     | 20    | 10      | 11      | 1548.22980                               | 0.00013                                                        |
| 21   | 9      | 12     | 20    | 9       | 11      | 1548.22980                               | 0.00013                                                        |
| 27   | 3      | 25     | 26    | 3       | 24      | 1548.24278                               | -0.00010                                                       |
| 27   | 2      | 25     | 26    | 2       | 24      | 1548.24278                               | -0.00010                                                       |
| 28   | 1      | 27     | 27    | 1       | 26      | 1548.26126                               | -0.00028                                                       |
| 28   | 2      | 27     | 27    | 2       | 26      | 1548.26126                               | -0.00028                                                       |
| 29   | 1      | 29     | 28    | 1       | 28      | 1548.28004                               | -0.00029                                                       |
| 29   | 0      | 29     | 28    | 0       | 28      | 1548.28004                               | -0.00029                                                       |
| 24   | 6      | 18     | 23    | 6       | 17      | 1548.28223                               | -0.00038                                                       |
| 24   | 7      | 18     | 23    | 7       | 17      | 1548.28223                               | -0.00038                                                       |
| 25   | 6      | 20     | 24    | 6       | 19      | 1548.30090                               | 0.00024                                                        |
| 25   | 5      | 20     | 24    | 5       | 19      | 1548.30090                               | 0.00024                                                        |
| 26   | 4      | 22     | 25    | 4       | 21      | 1548.31904                               | 0.00018                                                        |
| 26   | 5      | 22     | 25    | 5       | 21      | 1548.31904                               | 0.00018                                                        |
| 27   | 4      | 24     | 26    | 4       | 23      | 1548.33702                               | -0.00018                                                       |
| 27   | 3      | 24     | 26    | 3       | 23      | 1548.33702                               | -0.00018                                                       |
| 22   | 9      | 13     | 21    | 9       | 12      | 1548.34273                               | 0.00029                                                        |
| 22   | 10     | 13     | 21    | 10      | 12      | 1548.34273                               | 0.00029                                                        |
| 28   | 2      | 26     | 27    | 2       | 25      | 1548.35582                               | 0.00015                                                        |
| 28   | 3      | 26     | 27    | 3       | 25      | 1548.35582                               | 0.00015                                                        |
| 23   | 9      | 15     | 22    | 9       | 14      | 1548.35963                               | -0.00022                                                       |
| 23   | 8      | 15     | 22    | 8       | 14      | 1548.35963                               | -0.00022                                                       |
| 29   | 2      | 28     | 28    | 2       | 27      | 1548.37433                               | 0.00005                                                        |
| 29   | 1      | 28     | 28    | 1       | 27      | 1548.37433                               | 0.00005                                                        |
| 24   | 7      | 17     | 23    | 7       | 16      | 1548.37757                               | 0.00004                                                        |
| 24   | 8      | 17     | 23    | 8       | 16      | 1548.37757                               | 0.00004                                                        |
| 30   | 0      | 30     | 29    | 0       | 29      | 1548.39292                               | -0.00011                                                       |
| 30   | 1      | 30     | 29    | 1       | 29      | 1548.39292                               | -0.00011                                                       |
| 25   | 7      | 19     | 24    | 7       | 18      | 1548.39514                               | -0.00026                                                       |
| 25   | 6      | 19     | 24    | 6       | 18      | 1548.39514                               | -0.00026                                                       |
| 26   | 5      | 21     | 25    | 5       | 20      | 1548.41342                               | 0.00000                                                        |
| 26   | 6      | 21     | 25    | 6       | 20      | 1548.41342                               | 0.00000                                                        |
| 27   | 5      | 23     | 26    | 5       | 22      | 1548.43186                               | 0.00028                                                        |
| 27   | 4      | 23     | 26    | 4       | 22      | 1548.43186                               | 0.00028                                                        |
| 28   | 3      | 25     | 27    | 3       | 24      | 1548.44988                               | 0.00000                                                        |
| 28   | 4      | 25     | 27    | 4       | 24      | 1548.44988                               | 0.00000                                                        |
| 23   | 10     | 14     | 22    | 10      | 13      | 1548.45509                               | -0.00002                                                       |
| 23   | 9      | 14     | 22    | 9       | 13      | 1548.45509                               | -0.00002                                                       |
| 29   | 3      | 27     | 28    | 3       | 26      | 1548.46823                               | -0.00008                                                       |
| 29   | 2      | 27     | 28    | 2       | 26      | 1548.46823                               | -0.00008                                                       |

Continuation, see next page

Continuation of Table 30:  $\nu_3 \leftarrow gs$  of dithiine.

| $J'$ | $K'_a$ | $K'_c$ | $J''$ | $K''_a$ | $K''_c$ | $\tilde{\nu}_{obs}$<br>/cm <sup>-1</sup> | $(\tilde{\nu}_{obs} - \tilde{\nu}_{cat})$<br>/cm <sup>-1</sup> |
|------|--------|--------|-------|---------|---------|------------------------------------------|----------------------------------------------------------------|
| 24   | 8      | 16     | 23    | 8       | 15      | 1548.47302                               | 0.00047                                                        |
| 24   | 9      | 16     | 23    | 9       | 15      | 1548.47302                               | 0.00047                                                        |
| 30   | 1      | 29     | 29    | 1       | 28      | 1548.48686                               | -0.00002                                                       |
| 30   | 2      | 29     | 29    | 2       | 28      | 1548.48686                               | -0.00002                                                       |
| 25   | 8      | 18     | 24    | 8       | 17      | 1548.49021                               | -0.00001                                                       |
| 25   | 7      | 18     | 24    | 7       | 17      | 1548.49021                               | -0.00001                                                       |
| 31   | 1      | 31     | 30    | 1       | 30      | 1548.50579                               | 0.00020                                                        |
| 31   | 0      | 31     | 30    | 0       | 30      | 1548.50579                               | 0.00020                                                        |
| 26   | 6      | 20     | 25    | 6       | 19      | 1548.50782                               | -0.00024                                                       |
| 26   | 7      | 20     | 25    | 7       | 19      | 1548.50782                               | -0.00024                                                       |
| 27   | 6      | 22     | 26    | 6       | 21      | 1548.52583                               | -0.00022                                                       |
| 27   | 5      | 22     | 26    | 5       | 21      | 1548.52583                               | -0.00022                                                       |
| 28   | 4      | 24     | 27    | 4       | 23      | 1548.54428                               | 0.00011                                                        |
| 28   | 5      | 24     | 27    | 5       | 23      | 1548.54428                               | 0.00011                                                        |
| 29   | 4      | 26     | 28    | 4       | 25      | 1548.56260                               | 0.00018                                                        |
| 29   | 3      | 26     | 28    | 3       | 25      | 1548.56260                               | 0.00018                                                        |
| 24   | 9      | 15     | 23    | 9       | 14      | 1548.56768                               | 0.00001                                                        |
| 24   | 10     | 15     | 23    | 10      | 14      | 1548.56768                               | 0.00001                                                        |
| 30   | 2      | 28     | 29    | 2       | 27      | 1548.58071                               | -0.00010                                                       |
| 30   | 3      | 28     | 29    | 3       | 27      | 1548.58071                               | -0.00010                                                       |
| 25   | 9      | 17     | 24    | 9       | 16      | 1548.58488                               | -0.00024                                                       |
| 25   | 8      | 17     | 24    | 8       | 16      | 1548.58488                               | -0.00024                                                       |
| 31   | 2      | 30     | 30    | 2       | 29      | 1548.59924                               | -0.00010                                                       |
| 31   | 1      | 30     | 30    | 1       | 29      | 1548.59924                               | -0.00010                                                       |
| 26   | 7      | 19     | 25    | 7       | 18      | 1548.60293                               | 0.00015                                                        |
| 26   | 8      | 19     | 25    | 8       | 18      | 1548.60293                               | 0.00015                                                        |
| 32   | 0      | 32     | 31    | 0       | 31      | 1548.61765                               | -0.00036                                                       |
| 32   | 1      | 32     | 31    | 1       | 31      | 1548.61765                               | -0.00036                                                       |
| 27   | 7      | 21     | 26    | 7       | 20      | 1548.62035                               | -0.00023                                                       |
| 27   | 6      | 21     | 26    | 6       | 20      | 1548.62035                               | -0.00023                                                       |
| 28   | 5      | 23     | 27    | 5       | 22      | 1548.63855                               | 0.00002                                                        |
| 28   | 6      | 23     | 27    | 6       | 22      | 1548.63855                               | 0.00002                                                        |
| 29   | 5      | 25     | 28    | 5       | 24      | 1548.65683                               | 0.00022                                                        |
| 29   | 4      | 25     | 28    | 4       | 24      | 1548.65683                               | 0.00022                                                        |
| 30   | 3      | 27     | 29    | 3       | 26      | 1548.67461                               | -0.00022                                                       |
| 30   | 4      | 27     | 29    | 4       | 26      | 1548.67461                               | -0.00022                                                       |
| 25   | 10     | 16     | 24    | 10      | 15      | 1548.68016                               | 0.00004                                                        |
| 25   | 9      | 16     | 24    | 9       | 15      | 1548.68016                               | 0.00004                                                        |
| 31   | 3      | 29     | 30    | 3       | 28      | 1548.69332                               | 0.00014                                                        |
| 31   | 2      | 29     | 30    | 2       | 28      | 1548.69332                               | 0.00014                                                        |
| 26   | 8      | 18     | 25    | 8       | 17      | 1548.69766                               | 0.00009                                                        |
| 26   | 9      | 18     | 25    | 9       | 17      | 1548.69766                               | 0.00009                                                        |
| 32   | 1      | 31     | 31    | 1       | 30      | 1548.71105                               | -0.00062                                                       |
| 32   | 2      | 31     | 31    | 2       | 30      | 1548.71105                               | -0.00062                                                       |
| 27   | 8      | 20     | 26    | 8       | 19      | 1548.71545                               | 0.00026                                                        |
| 27   | 7      | 20     | 26    | 7       | 19      | 1548.71545                               | 0.00026                                                        |

Continuation, see next page

Continuation of Table 30:  $\nu_3 \leftarrow gs$  of dithiine.

| $J'$ | $K'_a$ | $K'_c$ | $J''$ | $K''_a$ | $K''_c$ | $\tilde{\nu}_{obs}$<br>/cm <sup>-1</sup> | $(\tilde{\nu}_{obs} - \tilde{\nu}_{cat})$<br>/cm <sup>-1</sup> |
|------|--------|--------|-------|---------|---------|------------------------------------------|----------------------------------------------------------------|
| 33   | 1      | 33     | 32    | 1       | 32      | 1548.73005                               | -0.00024                                                       |
| 33   | 0      | 33     | 32    | 0       | 32      | 1548.73005                               | -0.00024                                                       |
| 28   | 6      | 22     | 27    | 6       | 21      | 1548.73312                               | 0.00015                                                        |
| 28   | 7      | 22     | 27    | 7       | 21      | 1548.73312                               | 0.00015                                                        |
| 29   | 6      | 24     | 28    | 6       | 23      | 1548.75073                               | -0.00015                                                       |
| 29   | 5      | 24     | 28    | 5       | 23      | 1548.75073                               | -0.00015                                                       |
| 30   | 4      | 26     | 29    | 4       | 25      | 1548.76861                               | -0.00031                                                       |
| 30   | 5      | 26     | 29    | 5       | 25      | 1548.76861                               | -0.00031                                                       |
| 25   | 11     | 15     | 24    | 11      | 14      | 1548.77527                               | 0.00004                                                        |
| 25   | 10     | 15     | 24    | 10      | 14      | 1548.77527                               | 0.00004                                                        |
| 31   | 4      | 28     | 30    | 4       | 27      | 1548.78739                               | 0.00029                                                        |
| 31   | 3      | 28     | 30    | 3       | 27      | 1548.78739                               | 0.00029                                                        |
| 26   | 9      | 17     | 25    | 9       | 16      | 1548.79267                               | 0.00023                                                        |
| 26   | 10     | 17     | 25    | 10      | 16      | 1548.79267                               | 0.00023                                                        |
| 32   | 2      | 30     | 31    | 2       | 29      | 1548.80540                               | 0.00000                                                        |
| 32   | 3      | 30     | 31    | 3       | 29      | 1548.80540                               | 0.00000                                                        |
| 27   | 9      | 19     | 26    | 9       | 18      | 1548.80958                               | -0.00030                                                       |
| 27   | 8      | 19     | 26    | 8       | 18      | 1548.80958                               | -0.00030                                                       |
| 28   | 7      | 21     | 27    | 7       | 20      | 1548.82751                               | 0.00003                                                        |
| 28   | 8      | 21     | 27    | 8       | 20      | 1548.82751                               | 0.00003                                                        |
| 34   | 0      | 34     | 33    | 0       | 33      | 1548.84185                               | -0.00058                                                       |
| 34   | 1      | 34     | 33    | 1       | 33      | 1548.84185                               | -0.00058                                                       |
| 29   | 7      | 23     | 28    | 7       | 22      | 1548.84532                               | 0.00010                                                        |
| 29   | 6      | 23     | 28    | 6       | 22      | 1548.84532                               | 0.00010                                                        |
| 30   | 5      | 25     | 29    | 5       | 24      | 1548.86260                               | -0.00049                                                       |
| 30   | 6      | 25     | 29    | 6       | 24      | 1548.86260                               | -0.00049                                                       |
| 31   | 5      | 27     | 30    | 5       | 26      | 1548.88122                               | 0.00013                                                        |
| 31   | 4      | 27     | 30    | 4       | 26      | 1548.88122                               | 0.00013                                                        |
| 26   | 10     | 16     | 25    | 10      | 15      | 1548.88779                               | 0.00037                                                        |
| 26   | 11     | 16     | 25    | 11      | 15      | 1548.88779                               | 0.00037                                                        |
| 32   | 3      | 29     | 31    | 3       | 28      | 1548.89903                               | -0.00020                                                       |
| 32   | 4      | 29     | 31    | 4       | 28      | 1548.89903                               | -0.00020                                                       |
| 27   | 10     | 18     | 26    | 10      | 17      | 1548.90471                               | 0.00007                                                        |
| 27   | 9      | 18     | 26    | 9       | 17      | 1548.90471                               | 0.00007                                                        |
| 33   | 3      | 31     | 32    | 3       | 30      | 1548.91741                               | -0.00008                                                       |
| 33   | 2      | 31     | 32    | 2       | 30      | 1548.91741                               | -0.00008                                                       |
| 28   | 8      | 20     | 27    | 8       | 19      | 1548.92178                               | -0.00028                                                       |
| 28   | 9      | 20     | 27    | 9       | 19      | 1548.92178                               | -0.00028                                                       |
| 34   | 1      | 33     | 33    | 1       | 32      | 1548.93556                               | -0.00034                                                       |
| 34   | 2      | 33     | 33    | 2       | 32      | 1548.93556                               | -0.00034                                                       |
| 29   | 8      | 22     | 28    | 8       | 21      | 1548.93945                               | -0.00017                                                       |
| 29   | 7      | 22     | 28    | 7       | 21      | 1548.93945                               | -0.00017                                                       |
| 35   | 1      | 35     | 34    | 1       | 34      | 1548.95396                               | -0.00048                                                       |
| 35   | 0      | 35     | 34    | 0       | 34      | 1548.95396                               | -0.00048                                                       |
| 30   | 6      | 24     | 29    | 6       | 23      | 1548.95677                               | -0.00056                                                       |
| 30   | 7      | 24     | 29    | 7       | 23      | 1548.95677                               | -0.00056                                                       |

Continuation, see next page

Continuation of Table 30:  $\nu_3 \leftarrow gs$  of dithiine.

| $J'$ | $K'_a$ | $K'_c$ | $J''$ | $K''_a$ | $K''_c$ | $\tilde{\nu}_{obs}$<br>/cm <sup>-1</sup> | $(\tilde{\nu}_{obs} - \tilde{\nu}_{cat})$<br>/cm <sup>-1</sup> |
|------|--------|--------|-------|---------|---------|------------------------------------------|----------------------------------------------------------------|
| 31   | 6      | 26     | 30    | 6       | 25      | 1548.97502                               | -0.00014                                                       |
| 31   | 5      | 26     | 30    | 5       | 25      | 1548.97502                               | -0.00014                                                       |
| 26   | 11     | 15     | 25    | 11      | 14      | 1548.98240                               | -0.00013                                                       |
| 26   | 12     | 15     | 25    | 12      | 14      | 1548.98240                               | -0.00013                                                       |
| 32   | 4      | 28     | 31    | 4       | 27      | 1548.99291                               | -0.00022                                                       |
| 32   | 5      | 28     | 31    | 5       | 27      | 1548.99291                               | -0.00022                                                       |
| 27   | 11     | 17     | 26    | 11      | 16      | 1548.99946                               | -0.00003                                                       |
| 27   | 10     | 17     | 26    | 10      | 16      | 1548.99946                               | -0.00003                                                       |
| 33   | 4      | 30     | 32    | 4       | 29      | 1549.01116                               | -0.00006                                                       |
| 33   | 3      | 30     | 32    | 3       | 29      | 1549.01116                               | -0.00006                                                       |
| 28   | 9      | 19     | 27    | 9       | 18      | 1549.01664                               | -0.00007                                                       |
| 28   | 10     | 19     | 27    | 10      | 18      | 1549.01664                               | -0.00007                                                       |
| 34   | 2      | 32     | 33    | 2       | 31      | 1549.02940                               | -0.00004                                                       |
| 34   | 3      | 32     | 33    | 3       | 31      | 1549.02940                               | -0.00004                                                       |
| 29   | 9      | 21     | 28    | 9       | 20      | 1549.03396                               | -0.00014                                                       |
| 29   | 8      | 21     | 28    | 8       | 20      | 1549.03396                               | -0.00014                                                       |
| 30   | 7      | 23     | 29    | 7       | 22      | 1549.05185                               | 0.00021                                                        |
| 30   | 8      | 23     | 29    | 8       | 22      | 1549.05185                               | 0.00021                                                        |
| 36   | 0      | 36     | 35    | 0       | 35      | 1549.06568                               | -0.00062                                                       |
| 36   | 1      | 36     | 35    | 1       | 35      | 1549.06568                               | -0.00062                                                       |
| 31   | 7      | 25     | 30    | 7       | 24      | 1549.06927                               | -0.00004                                                       |
| 31   | 6      | 25     | 30    | 6       | 24      | 1549.06927                               | -0.00004                                                       |
| 32   | 5      | 27     | 31    | 5       | 26      | 1549.08698                               | -0.00012                                                       |
| 32   | 6      | 27     | 31    | 6       | 26      | 1549.08698                               | -0.00012                                                       |
| 27   | 12     | 16     | 26    | 12      | 15      | 1549.09498                               | 0.00052                                                        |
| 27   | 11     | 16     | 26    | 11      | 15      | 1549.09498                               | 0.00052                                                        |
| 33   | 5      | 29     | 32    | 5       | 28      | 1549.10486                               | -0.00016                                                       |
| 33   | 4      | 29     | 32    | 4       | 28      | 1549.10486                               | -0.00016                                                       |
| 28   | 10     | 18     | 27    | 10      | 17      | 1549.11166                               | 0.00021                                                        |
| 28   | 11     | 18     | 27    | 11      | 17      | 1549.11166                               | 0.00021                                                        |
| 34   | 3      | 31     | 33    | 3       | 30      | 1549.12312                               | 0.00005                                                        |
| 34   | 4      | 31     | 33    | 4       | 30      | 1549.12312                               | 0.00005                                                        |
| 29   | 10     | 20     | 28    | 10      | 19      | 1549.12906                               | 0.00041                                                        |
| 29   | 9      | 20     | 28    | 9       | 19      | 1549.12906                               | 0.00041                                                        |
| 30   | 8      | 22     | 29    | 8       | 21      | 1549.14549                               | -0.00053                                                       |
| 30   | 9      | 22     | 29    | 9       | 21      | 1549.14549                               | -0.00053                                                       |
| 25   | 14     | 11     | 24    | 14      | 10      | 1549.15872                               | 0.00002                                                        |
| 25   | 15     | 11     | 24    | 15      | 10      | 1549.15872                               | 0.00006                                                        |
| 31   | 8      | 24     | 30    | 8       | 23      | 1549.16302                               | -0.00050                                                       |
| 31   | 7      | 24     | 30    | 7       | 23      | 1549.16302                               | -0.00050                                                       |
| 32   | 6      | 26     | 31    | 6       | 25      | 1549.18107                               | -0.00008                                                       |
| 32   | 7      | 26     | 31    | 7       | 25      | 1549.18107                               | -0.00008                                                       |
| 33   | 6      | 28     | 32    | 6       | 27      | 1549.19881                               | -0.00009                                                       |
| 33   | 5      | 28     | 32    | 5       | 27      | 1549.19881                               | -0.00009                                                       |
| 28   | 11     | 17     | 27    | 11      | 16      | 1549.20646                               | 0.00018                                                        |
| 28   | 12     | 17     | 27    | 12      | 16      | 1549.20646                               | 0.00018                                                        |

Continuation, see next page

Continuation of Table 30:  $\nu_3 \leftarrow gs$  of dithiine.

| $J'$ | $K'_a$ | $K'_c$ | $J''$ | $K''_a$ | $K''_c$ | $\tilde{\nu}_{obs}$<br>/cm <sup>-1</sup> | $(\tilde{\nu}_{obs} - \tilde{\nu}_{cat})$<br>/cm <sup>-1</sup> |
|------|--------|--------|-------|---------|---------|------------------------------------------|----------------------------------------------------------------|
| 34   | 4      | 30     | 33    | 4       | 29      | 1549.21668                               | -0.00011                                                       |
| 34   | 5      | 30     | 33    | 5       | 29      | 1549.21668                               | -0.00011                                                       |
| 29   | 11     | 19     | 28    | 11      | 18      | 1549.22289                               | -0.00039                                                       |
| 29   | 10     | 19     | 28    | 10      | 18      | 1549.22289                               | -0.00039                                                       |
| 35   | 4      | 32     | 34    | 4       | 31      | 1549.23453                               | -0.00027                                                       |
| 35   | 3      | 32     | 34    | 3       | 31      | 1549.23453                               | -0.00027                                                       |
| 36   | 2      | 34     | 35    | 2       | 33      | 1549.25265                               | -0.00029                                                       |
| 36   | 3      | 34     | 35    | 3       | 33      | 1549.25265                               | -0.00029                                                       |
| 37   | 2      | 36     | 36    | 2       | 35      | 1549.27102                               | -0.00019                                                       |
| 37   | 1      | 36     | 36    | 1       | 35      | 1549.27102                               | -0.00019                                                       |
| 32   | 7      | 25     | 31    | 7       | 24      | 1549.27561                               | 0.00034                                                        |
| 32   | 8      | 25     | 31    | 8       | 24      | 1549.27561                               | 0.00034                                                        |
| 33   | 7      | 27     | 32    | 7       | 26      | 1549.29245                               | -0.00041                                                       |
| 33   | 6      | 27     | 32    | 6       | 26      | 1549.29245                               | -0.00041                                                       |
| 34   | 5      | 29     | 33    | 5       | 28      | 1549.31066                               | 0.00009                                                        |
| 34   | 6      | 29     | 33    | 6       | 28      | 1549.31066                               | 0.00009                                                        |
| 29   | 12     | 18     | 28    | 12      | 17      | 1549.31821                               | 0.00022                                                        |
| 29   | 11     | 18     | 28    | 11      | 17      | 1549.31821                               | 0.00022                                                        |
| 35   | 5      | 31     | 34    | 5       | 30      | 1549.32850                               | 0.00009                                                        |
| 35   | 4      | 31     | 34    | 4       | 30      | 1549.32850                               | 0.00009                                                        |
| 30   | 10     | 20     | 29    | 10      | 19      | 1549.33472                               | -0.00026                                                       |
| 30   | 11     | 20     | 29    | 11      | 19      | 1549.33472                               | -0.00026                                                       |
| 31   | 10     | 22     | 30    | 10      | 21      | 1549.35223                               | 0.00008                                                        |
| 31   | 9      | 22     | 30    | 9       | 21      | 1549.35223                               | 0.00008                                                        |
| 32   | 8      | 24     | 31    | 8       | 23      | 1549.36944                               | -0.00001                                                       |
| 32   | 9      | 24     | 31    | 9       | 23      | 1549.36944                               | -0.00001                                                       |
| 33   | 8      | 26     | 32    | 8       | 25      | 1549.38660                               | -0.00028                                                       |
| 33   | 7      | 26     | 32    | 7       | 25      | 1549.38660                               | -0.00028                                                       |
| 34   | 6      | 28     | 33    | 6       | 27      | 1549.40420                               | -0.00023                                                       |
| 34   | 7      | 28     | 33    | 7       | 27      | 1549.40420                               | -0.00023                                                       |
| 35   | 6      | 30     | 34    | 6       | 29      | 1549.42182                               | -0.00029                                                       |
| 35   | 5      | 30     | 34    | 5       | 29      | 1549.42182                               | -0.00029                                                       |
| 36   | 4      | 32     | 35    | 4       | 31      | 1549.43980                               | -0.00011                                                       |
| 36   | 5      | 32     | 35    | 5       | 31      | 1549.43980                               | -0.00011                                                       |
